# Supplementary material for: Microbial Diversity Characteristics of Areca Palm Rhizosphere Soil at Different Growth Stages
Source: MDPI journal article supplement (doi:10.3390/plants10122706), 2021-12-09
Supplement: s1 [file s1]

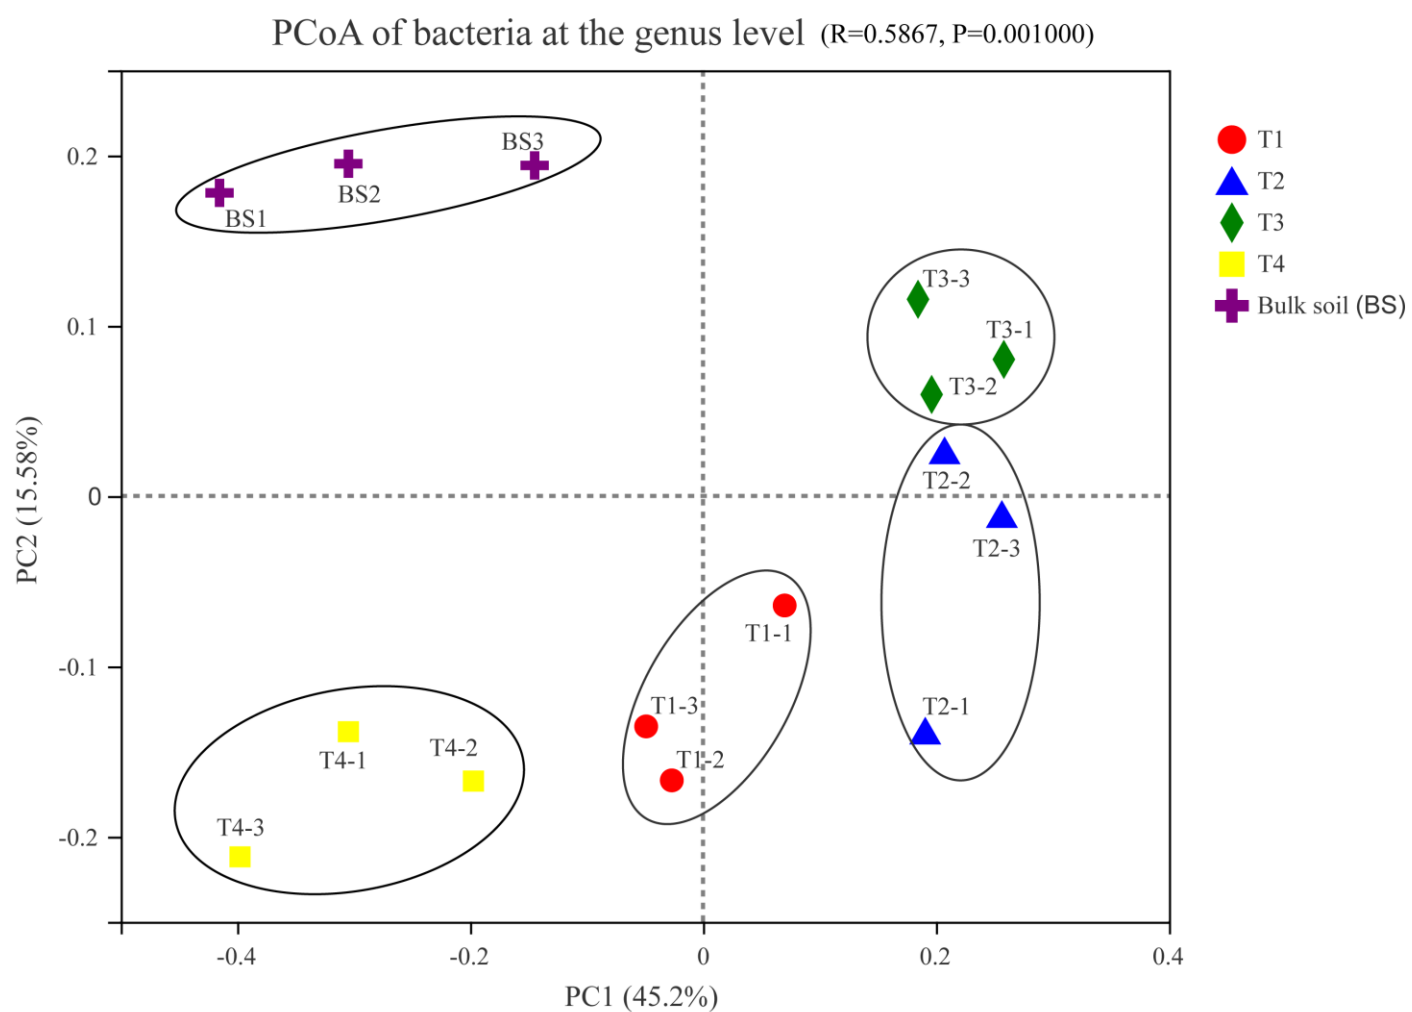

**Figure S1.** PCoA analysis of bacterial communities at the genus level in the soil samples.

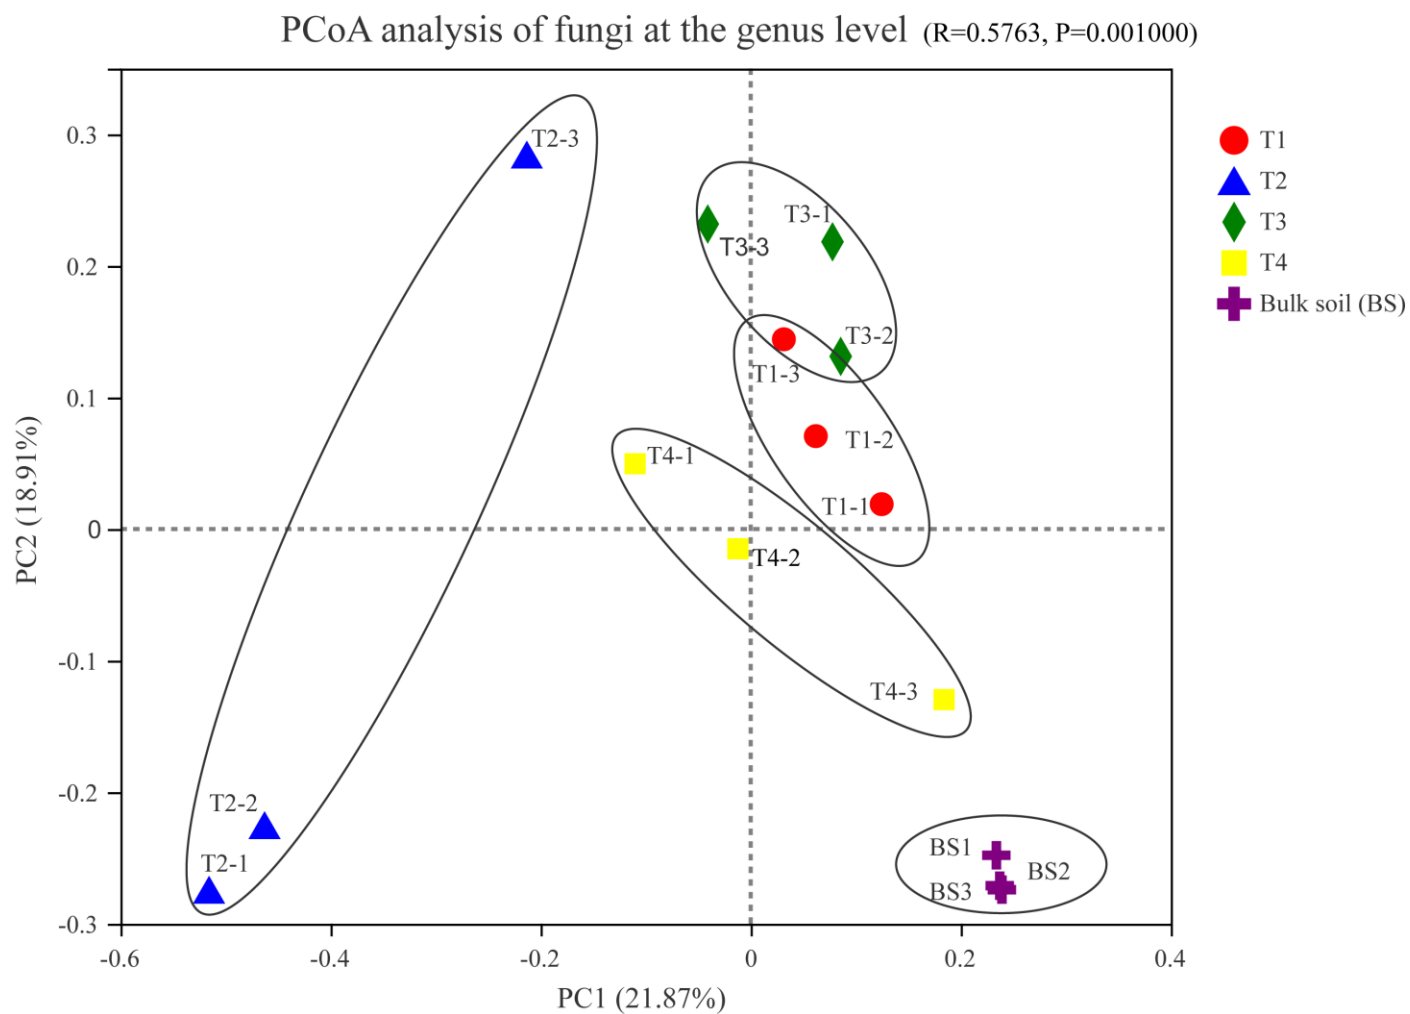

**Figure S2.** PCoA analysis of fungal communities at the genus level in the soil samples.
