# Supplementary material for: Microbial Diversity Characteristics of Areca Palm Rhizosphere Soil at Different Growth Stages
Source: Plants (Basel). 2021 Dec 9;10(12):2706. doi: 10.3390/plants10122706 (PMC8705836; doi:10.3390/plants10122706)
Supplement: Supplementary file 1 [file plants-10-02706-s001.zip › Table S1-bacterial OTUs used in this study.xls]

## Sheet: OTU表
Domain	Kingdom	Phylum	Class	Order	Family	Genus	Species	OTU	1_1	1_2	1_3	2_1	2_2	2_3	3_1	3_3	3_4	BS1	BS2	BS3	BSJ1	BSJ3	BSJ4	SUM
d__Bacteria	k__norank_d__Bacteria	p__Actinobacteriota	c__Acidimicrobiia	o__Microtrichales	f__Ilumatobacteraceae	g__norank_f__Ilumatobacteraceae	s__metagenome_g__norank_f__Ilumatobacteraceae	OTU2935	0	0	1	0	0	0	0	1	0	3	0	0	0	0	3	8
d__Bacteria	k__norank_d__Bacteria	p__Chloroflexi	c__Anaerolineae	o__SBR1031	f__A4b	g__norank_f__A4b	s__unclassified_g__norank_f__A4b	OTU278	0	10	0	0	0	0	0	0	0	0	0	0	0	0	0	10
d__Bacteria	k__norank_d__Bacteria	p__Planctomycetota	c__Phycisphaerae	o__Phycisphaerales	f__Phycisphaeraceae	g__SM1A02	s__uncultured_bacterium_g__SM1A02	OTU504	0	0	4	0	0	0	0	0	0	0	0	0	0	0	0	4
d__Bacteria	k__norank_d__Bacteria	p__Proteobacteria	c__Gammaproteobacteria	o__unclassified_c__Gammaproteobacteria	f__unclassified_c__Gammaproteobacteria	g__unclassified_c__Gammaproteobacteria	s__unclassified_c__Gammaproteobacteria	OTU6363	0	0	3	0	1	1	2	0	0	0	0	0	0	0	0	7
d__Bacteria	k__norank_d__Bacteria	p__Proteobacteria	c__Gammaproteobacteria	o__unclassified_c__Gammaproteobacteria	f__unclassified_c__Gammaproteobacteria	g__unclassified_c__Gammaproteobacteria	s__unclassified_c__Gammaproteobacteria	OTU1407	0	0	0	0	0	3	0	0	0	0	0	0	0	0	0	3
d__Bacteria	k__norank_d__Bacteria	p__Firmicutes	c__Clostridia	o__Lachnospirales	f__Lachnospiraceae	g__Epulopiscium	s__unclassified_g__Epulopiscium	OTU4679	1	2	2	0	0	0	0	0	0	0	0	0	0	0	0	5
d__Bacteria	k__norank_d__Bacteria	p__Proteobacteria	c__Gammaproteobacteria	o__Diplorickettsiales	f__Diplorickettsiaceae	g__Aquicella	s__metagenome_g__Aquicella	OTU677	0	0	3	0	0	0	1	0	3	0	2	0	0	0	0	9
d__Bacteria	k__norank_d__Bacteria	p__Acidobacteriota	c__Subgroup_5	o__norank_c__Subgroup_5	f__norank_o__norank_c__Subgroup_5	g__norank_f__norank_o__norank_c__Subgroup_5	s__unclassified_g__norank_f__norank_o__norank_c__Subgroup_5	OTU4176	1	0	6	0	0	0	1	0	0	3	2	0	0	0	7	20
d__Bacteria	k__norank_d__Bacteria	p__Chloroflexi	c__Ktedonobacteria	o__Ktedonobacterales	f__Ktedonobacteraceae	g__FCPS473	s__uncultured_bacterium_g__FCPS473	OTU3621	0	0	0	0	0	0	0	1	3	0	6	6	0	0	0	16
d__Bacteria	k__norank_d__Bacteria	p__Firmicutes	c__Bacilli	o__Bacillales	f__Bacillaceae	g__Bacillus	s__unclassified_g__Bacillus	OTU3590	0	0	0	0	0	0	0	0	0	9	0	1	0	0	1	11
d__Bacteria	k__norank_d__Bacteria	p__Chloroflexi	c__Ktedonobacteria	o__Ktedonobacterales	f__Ktedonobacteraceae	g__FCPS473	s__uncultured_Thermosporothrix_sp._g__FCPS473	OTU1952	1	2	5	0	7	7	10	6	12	1	12	5	5	1	0	74
d__Bacteria	k__norank_d__Bacteria	p__Myxococcota	c__Polyangia	o__Blfdi19	f__norank_o__Blfdi19	g__norank_f__norank_o__Blfdi19	s__unclassified_g__norank_f__norank_o__Blfdi19	OTU1410	0	0	0	0	0	4	0	1	0	0	0	0	0	0	0	5
d__Bacteria	k__norank_d__Bacteria	p__Bacteroidota	c__Bacteroidia	o__Chitinophagales	f__Chitinophagaceae	g__Sediminibacterium	s__unclassified_g__Sediminibacterium	OTU97	2	0	8	0	0	0	0	0	1	1	0	1	0	0	1	14
d__Bacteria	k__norank_d__Bacteria	p__Verrucomicrobiota	c__Verrucomicrobiae	o__Pedosphaerales	f__Pedosphaeraceae	g__norank_f__Pedosphaeraceae	s__unclassified_g__norank_f__Pedosphaeraceae	OTU6159	0	3	1	11	0	3	1	2	5	0	1	1	3	1	2	34
d__Bacteria	k__norank_d__Bacteria	p__Dependentiae	c__Babeliae	o__Babeliales	f__Vermiphilaceae	g__norank_f__Vermiphilaceae	s__uncultured_bacterium_g__norank_f__Vermiphilaceae	OTU2718	0	2	1	0	0	4	4	3	6	1	8	4	11	0	0	44
d__Bacteria	k__norank_d__Bacteria	p__Chloroflexi	c__Ktedonobacteria	o__Ktedonobacterales	f__Ktedonobacteraceae	g__unclassified_f__Ktedonobacteraceae	s__unclassified_f__Ktedonobacteraceae	OTU4989	0	1	0	0	0	1	1	0	3	0	4	0	3	0	0	13
d__Bacteria	k__norank_d__Bacteria	p__Myxococcota	c__Polyangia	o__Polyangiales	f__Sandaracinaceae	g__norank_f__Sandaracinaceae	s__metagenome_g__norank_f__Sandaracinaceae	OTU3050	0	0	0	0	0	0	0	0	0	4	0	0	0	0	0	4
d__Bacteria	k__norank_d__Bacteria	p__FCPU426	c__norank_p__FCPU426	o__norank_c__norank_p__FCPU426	f__norank_o__norank_c__norank_p__FCPU426	g__norank_f__norank_o__norank_c__norank_p__FCPU426	s__uncultured_bacterium_g__norank_f__norank_o__norank_c__norank_p__FCPU426	OTU2193	0	0	0	0	3	6	0	0	8	0	2	15	0	1	0	35
d__Bacteria	k__norank_d__Bacteria	p__Dependentiae	c__Babeliae	o__Babeliales	f__Vermiphilaceae	g__norank_f__Vermiphilaceae	s__uncultured_bacterium_g__norank_f__Vermiphilaceae	OTU2713	0	0	0	0	0	1	2	1	3	0	0	0	0	0	0	7
d__Bacteria	k__norank_d__Bacteria	p__Actinobacteriota	c__Acidimicrobiia	o__Microtrichales	f__unclassified_o__Microtrichales	g__unclassified_o__Microtrichales	s__unclassified_o__Microtrichales	OTU1018	9	1	2	4	2	2	0	2	0	1	1	1	1	0	1	27
d__Bacteria	k__norank_d__Bacteria	p__Gemmatimonadota	c__Gemmatimonadetes	o__Gemmatimonadales	f__Gemmatimonadaceae	g__norank_f__Gemmatimonadaceae	s__uncultured_bacterium_g__norank_f__Gemmatimonadaceae	OTU3718	0	0	1	3	7	5	1	3	13	5	1	39	7	3	0	88
d__Bacteria	k__norank_d__Bacteria	p__Proteobacteria	c__Alphaproteobacteria	o__Rickettsiales	f__Rickettsiaceae	g__norank_f__Rickettsiaceae	s__uncultured_soil_bacterium_g__norank_f__Rickettsiaceae	OTU5052	0	0	0	0	0	0	1	0	0	0	0	0	2	0	0	3
d__Bacteria	k__norank_d__Bacteria	p__Elusimicrobiota	c__norank_p__Elusimicrobiota	o__norank_c__norank_p__Elusimicrobiota	f__norank_o__norank_c__norank_p__Elusimicrobiota	g__norank_f__norank_o__norank_c__norank_p__Elusimicrobiota	s__uncultured_Acidobacteria_bacterium_g__norank_f__norank_o__norank	OTU1168	0	1	0	0	2	4	0	3	3	0	0	0	2	0	0	15
d__Bacteria	k__norank_d__Bacteria	p__Proteobacteria	c__Gammaproteobacteria	o__Pseudomonadales	f__Moraxellaceae	g__Moraxella	s__Moraxella_atlantae	OTU1020	0	0	2	2	0	0	0	0	0	0	0	0	0	0	0	4
d__Bacteria	k__norank_d__Bacteria	p__Proteobacteria	c__Gammaproteobacteria	o__Xanthomonadales	f__Xanthomonadaceae	g__Stenotrophomonas	s__Stenotrophomonas_acidaminiphila	OTU1508	0	0	0	0	0	1	0	0	0	0	0	0	0	0	1	2
d__Bacteria	k__norank_d__Bacteria	p__Chloroflexi	c__Ktedonobacteria	o__Ktedonobacterales	f__Ktedonobacteraceae	g__unclassified_f__Ktedonobacteraceae	s__unclassified_f__Ktedonobacteraceae	OTU1006	0	2	5	1	0	2	7	4	5	0	0	0	8	0	0	34
d__Bacteria	k__norank_d__Bacteria	p__Myxococcota	c__Myxococcia	o__Myxococcales	f__Anaeromyxobacteraceae	g__Anaeromyxobacter	s__uncultured_bacterium_SJA-5	OTU1773	0	1	1	1	0	4	5	1	3	0	0	1	4	1	0	22
d__Bacteria	k__norank_d__Bacteria	p__Firmicutes	c__Bacilli	o__Erysipelotrichales	f__Erysipelotrichaceae	g__Turicibacter	s__unclassified_g__Turicibacter	OTU931	0	0	2	2	1	0	0	0	1	0	0	0	0	0	0	6
d__Bacteria	k__norank_d__Bacteria	p__Actinobacteriota	c__Actinobacteria	o__Kineosporiales	f__Kineosporiaceae	g__Quadrisphaera	s__Quadrisphaera_granulorum	OTU3468	0	1	0	0	0	0	0	0	0	4	118	0	0	0	0	123
d__Bacteria	k__norank_d__Bacteria	p__Verrucomicrobiota	c__Chlamydiae	o__Chlamydiales	f__Simkaniaceae	g__unclassified_f__Simkaniaceae	s__unclassified_f__Simkaniaceae	OTU1522	0	0	0	0	0	1	0	0	1	0	0	0	0	0	0	2
d__Bacteria	k__norank_d__Bacteria	p__Chloroflexi	c__Anaerolineae	o__SBR1031	f__norank_o__SBR1031	g__norank_f__norank_o__SBR1031	s__uncultured_Gemmatimonadetes_bacterium_g__norank_f__norank	OTU4021	5	6	4	0	0	0	12	0	3	3	2	0	1	54	4	94
d__Bacteria	k__norank_d__Bacteria	p__Proteobacteria	c__Gammaproteobacteria	o__Diplorickettsiales	f__Diplorickettsiaceae	g__Aquicella	s__unclassified_g__Aquicella	OTU1781	0	0	0	0	0	1	1	0	0	0	0	0	0	0	0	2
d__Bacteria	k__norank_d__Bacteria	p__Acidobacteriota	c__Vicinamibacteria	o__Subgroup_17	f__norank_o__Subgroup_17	g__norank_f__norank_o__Subgroup_17	s__uncultured_Acidobacteria_bacterium_g__norank_f__norank_o__Subgroup_17	OTU4718	0	0	0	0	0	0	0	0	0	0	0	0	0	1	0	1
d__Bacteria	k__norank_d__Bacteria	p__Acidobacteriota	c__Acidobacteriae	o__Acidobacteriales	f__norank_o__Acidobacteriales	g__norank_f__norank_o__Acidobacteriales	s__unclassified_g__norank_f__norank_o__Acidobacteriales	OTU2783	0	0	0	2	1	0	2	1	5	0	0	0	3	0	0	14
d__Bacteria	k__norank_d__Bacteria	p__Firmicutes	c__Clostridia	o__Clostridiales	f__Caloramatoraceae	g__Fonticella	s__uncultured_bacterium_g__Fonticella	OTU5264	0	0	0	0	0	0	0	0	0	0	0	0	0	2	0	2
d__Bacteria	k__norank_d__Bacteria	p__Myxococcota	c__Polyangia	o__Haliangiales	f__Haliangiaceae	g__Haliangium	s__unclassified_g__Haliangium	OTU4250	0	0	0	0	0	1	0	0	0	0	0	0	0	1	0	2
d__Bacteria	k__norank_d__Bacteria	p__Gemmatimonadota	c__Gemmatimonadetes	o__Gemmatimonadales	f__Gemmatimonadaceae	g__norank_f__Gemmatimonadaceae	s__uncultured_bacterium_g__norank_f__Gemmatimonadaceae	OTU3172	1	0	0	0	0	0	0	0	0	4	0	0	0	0	0	5
d__Bacteria	k__norank_d__Bacteria	p__Armatimonadota	c__Chthonomonadetes	o__Chthonomonadales	f__norank_o__Chthonomonadales	g__norank_f__norank_o__Chthonomonadales	s__uncultured_bacterium_g__norank_f__norank_o__Chthonomonadales	OTU4371	0	0	0	0	0	0	0	0	2	1	0	0	0	1	0	4
d__Bacteria	k__norank_d__Bacteria	p__Firmicutes	c__Bacilli	o__Lactobacillales	f__Aerococcaceae	g__unclassified_f__Aerococcaceae	s__unclassified_f__Aerococcaceae	OTU5134	0	0	1	0	1	0	1	0	0	0	1	0	0	0	0	4
d__Bacteria	k__norank_d__Bacteria	p__Firmicutes	c__Bacilli	o__Alicyclobacillales	f__Alicyclobacillaceae	g__Tumebacillus	s__uncultured_bacterium_g__Tumebacillus	OTU6196	9	4	7	14	30	14	1	24	19	1	11	7	7	14	2	164
d__Bacteria	k__norank_d__Bacteria	p__Planctomycetota	c__Planctomycetes	o__Isosphaerales	f__Isosphaeraceae	g__norank_f__Isosphaeraceae	s__uncultured_bacterium_g__norank_f__Isosphaeraceae	OTU5735	0	0	0	0	0	0	0	0	0	0	0	0	0	0	1	1
d__Bacteria	k__norank_d__Bacteria	p__Actinobacteriota	c__Actinobacteria	o__Streptosporangiales	f__Thermomonosporaceae	g__Actinomadura	s__Actinomadura_sp._g__Actinomadura	OTU6328	0	0	3	0	0	0	0	0	0	0	1	0	0	1	0	5
d__Bacteria	k__norank_d__Bacteria	p__Proteobacteria	c__Gammaproteobacteria	o__Burkholderiales	f__SC-I-84	g__norank_f__SC-I-84	s__uncultured_beta_proteobacterium_g__norank_f__SC-I-84	OTU6475	31	93	32	30	11	72	18	3	48	82	112	149	17	69	11	778
d__Bacteria	k__norank_d__Bacteria	p__Actinobacteriota	c__Thermoleophilia	o__Solirubrobacterales	f__67-14	g__norank_f__67-14	s__Solirubrobacterales_bacterium_67-14	OTU6485	2	3	1	2	5	1	0	4	0	24	38	2	0	1	6	89
d__Bacteria	k__norank_d__Bacteria	p__Bacteroidota	c__Bacteroidia	o__Chitinophagales	f__Chitinophagaceae	g__Filimonas	s__unclassified_g__Filimonas	OTU382	6	17	61	0	1	1	0	0	0	0	0	0	0	2	3	91
d__Bacteria	k__norank_d__Bacteria	p__unclassified_k__norank_d__Bacteria	c__unclassified_k__norank_d__Bacteria	o__unclassified_k__norank_d__Bacteria	f__unclassified_k__norank_d__Bacteria	g__unclassified_k__norank_d__Bacteria	s__unclassified_k__norank_d__Bacteria	OTU4026	0	0	0	0	0	0	0	0	0	1	0	0	0	0	0	1
d__Bacteria	k__norank_d__Bacteria	p__SAR324_cladeMarine_group_B	c__norank_p__SAR324_cladeMarine_group_B	o__norank_c__norank_p__SAR324_cladeMarine_group_B	f__norank_o__norank_c__norank_p__SAR324_cladeMarine_group_B	g__norank_f__norank_o__norank_c__norank_p__SAR324_cladeMarine_group_B	s__unclassified_g__norank_f__norank_o__norank_c__norank_p__SAR324_cladeMarine_group_B	OTU153	3	0	0	0	0	0	0	0	0	0	0	0	0	0	0	3
d__Bacteria	k__norank_d__Bacteria	p__Actinobacteriota	c__Acidimicrobiia	o__IMCC26256	f__norank_o__IMCC26256	g__norank_f__norank_o__IMCC26256	s__unclassified_g__norank_f__norank_o__IMCC26256	OTU1100	0	0	0	5	0	15	25	23	15	0	0	0	10	0	0	93
d__Bacteria	k__norank_d__Bacteria	p__Verrucomicrobiota	c__Chlamydiae	o__Chlamydiales	f__Parachlamydiaceae	g__Neochlamydia	s__uncultured_bacterium_g__Neochlamydia	OTU5398	0	0	0	0	0	0	0	0	1	0	0	0	0	2	0	3
d__Bacteria	k__norank_d__Bacteria	p__Verrucomicrobiota	c__Chlamydiae	o__Chlamydiales	f__Simkaniaceae	g__norank_f__Simkaniaceae	s__unclassified_g__norank_f__Simkaniaceae	OTU4552	0	0	0	0	0	1	0	0	0	0	0	0	0	0	0	1
d__Bacteria	k__norank_d__Bacteria	p__Verrucomicrobiota	c__Verrucomicrobiae	o__Chthoniobacterales	f__Chthoniobacteraceae	g__Chthoniobacter	s__metagenome_g__Chthoniobacter	OTU3872	0	0	0	1	0	0	0	0	0	0	0	0	0	0	0	1
d__Bacteria	k__norank_d__Bacteria	p__Proteobacteria	c__Gammaproteobacteria	o__Diplorickettsiales	f__Diplorickettsiaceae	g__norank_f__Diplorickettsiaceae	s__uncultured_gamma_proteobacterium_g__norank_f__Diplorickettsiaceae	OTU5356	0	0	0	0	0	0	0	0	7	0	0	0	0	5	0	12
d__Bacteria	k__norank_d__Bacteria	p__Actinobacteriota	c__Actinobacteria	o__Catenulisporales	f__Actinospicaceae	g__Actinospica	s__unclassified_g__Actinospica	OTU5065	0	0	0	4	9	2	24	2	4	0	0	0	4	0	0	49
d__Bacteria	k__norank_d__Bacteria	p__Chloroflexi	c__Anaerolineae	o__SBR1031	f__norank_o__SBR1031	g__norank_f__norank_o__SBR1031	s__unclassified_g__norank_f__norank_o__SBR1031	OTU4819	0	0	0	0	0	0	0	0	0	0	0	0	0	2	0	2
d__Bacteria	k__norank_d__Bacteria	p__Actinobacteriota	c__Actinobacteria	o__Propionibacteriales	f__Nocardioidaceae	g__Nocardioides	s__uncultured_organism_g__Nocardioides	OTU1319	1	0	1	4	3	1	0	1	0	5	0	5	0	3	2	26
d__Bacteria	k__norank_d__Bacteria	p__Bdellovibrionota	c__Oligoflexia	o__0319-6G20	f__norank_o__0319-6G20	g__norank_f__norank_o__0319-6G20	s__unclassified_g__norank_f__norank_o__0319-6G20	OTU4906	0	0	0	1	1	1	1	3	0	0	0	0	9	0	0	16
d__Bacteria	k__norank_d__Bacteria	p__Chloroflexi	c__Ktedonobacteria	o__Ktedonobacterales	f__Ktedonobacteraceae	g__norank_f__Ktedonobacteraceae	s__unclassified_g__norank_f__Ktedonobacteraceae	OTU1533	0	0	0	1	0	4	0	0	5	0	0	0	0	0	0	10
d__Bacteria	k__norank_d__Bacteria	p__Firmicutes	c__Clostridia	o__Lachnospirales	f__Lachnospiraceae	g__Lachnospiraceae_UCG-004	s__uncultured_organism_g__Lachnospiraceae_UCG-004	OTU2007	0	0	0	0	0	0	4	0	0	0	0	0	0	0	0	4
d__Bacteria	k__norank_d__Bacteria	p__Chloroflexi	c__Chloroflexia	o__Chloroflexales	f__Roseiflexaceae	g__norank_f__Roseiflexaceae	s__uncultured_bacterium_g__norank_f__Roseiflexaceae	OTU5445	0	0	0	0	0	0	0	0	0	1	0	0	0	0	4	5
d__Bacteria	k__norank_d__Bacteria	p__Bdellovibrionota	c__Oligoflexia	o__0319-6G20	f__norank_o__0319-6G20	g__norank_f__norank_o__0319-6G20	s__uncultured_Geoalkalibacter_sp._g__norank	OTU4612	0	1	0	0	0	2	0	0	0	0	0	0	0	0	0	3
d__Bacteria	k__norank_d__Bacteria	p__Proteobacteria	c__Gammaproteobacteria	o__Gammaproteobacteria_Incertae_Sedis	f__unclassified_o__Gammaproteobacteria_Incertae_Sedis	g__Candidatus_Berkiella	s__uncultured_bacterium_g__Candidatus_Berkiella	OTU2006	0	0	0	0	0	0	1	1	0	0	0	0	0	0	0	2
d__Bacteria	k__norank_d__Bacteria	p__Proteobacteria	c__Gammaproteobacteria	o__Burkholderiales	f__Methylophilaceae	g__norank_f__Methylophilaceae	s__unclassified_g__norank_f__Methylophilaceae	OTU2319	0	2	13	19	0	5	22	0	2	0	6	1	0	0	1	71
d__Bacteria	k__norank_d__Bacteria	p__Proteobacteria	c__Alphaproteobacteria	o__norank_c__Alphaproteobacteria	f__norank_o__norank_c__Alphaproteobacteria	g__norank_f__norank_o__norank_c__Alphaproteobacteria	s__uncultured_Rhodobacteraceae_bacterium_g__norank	OTU6236	0	0	0	0	0	0	0	1	0	1	0	0	0	0	0	2
d__Bacteria	k__norank_d__Bacteria	p__Bacteroidota	c__Bacteroidia	o__Chitinophagales	f__Chitinophagaceae	g__Ferruginibacter	s__unclassified_g__Ferruginibacter	OTU4087	0	0	4	0	0	0	0	0	0	7	0	0	0	0	3	14
d__Bacteria	k__norank_d__Bacteria	p__Bacteroidota	c__Bacteroidia	o__Chitinophagales	f__Chitinophagaceae	g__norank_f__Chitinophagaceae	s__uncultured_bacterium_g__norank_f__Chitinophagaceae	OTU6292	0	0	0	0	0	0	0	0	0	1	0	0	0	0	0	1
d__Bacteria	k__norank_d__Bacteria	p__Chloroflexi	c__Ktedonobacteria	o__Ktedonobacterales	f__Ktedonobacteraceae	g__HSB_OF53-F07	s__unclassified_g__HSB_OF53-F07	OTU2424	5	3	6	38	2	24	9	33	58	0	0	2	9	1	1	191
d__Bacteria	k__norank_d__Bacteria	p__Chloroflexi	c__Ktedonobacteria	o__B12-WMSP1	f__norank_o__B12-WMSP1	g__norank_f__norank_o__B12-WMSP1	s__uncultured_Chloroflexi_bacterium_g__norank_f__norank_o__B12-WMSP1	OTU2010	0	2	0	1	6	4	16	5	10	0	0	0	2	0	2	48
d__Bacteria	k__norank_d__Bacteria	p__Bdellovibrionota	c__Oligoflexia	o__Oligoflexales	f__norank_o__Oligoflexales	g__norank_f__norank_o__Oligoflexales	s__unclassified_g__norank_f__norank_o__Oligoflexales	OTU4924	0	0	0	0	0	0	0	0	0	0	0	0	3	0	0	3
d__Bacteria	k__norank_d__Bacteria	p__Planctomycetota	c__Planctomycetes	o__Gemmatales	f__Gemmataceae	g__norank_f__Gemmataceae	s__uncultured_planctomycete_g__norank_f__Gemmataceae	OTU1151	1	2	2	3	13	0	2	5	9	0	0	1	3	3	1	45
d__Bacteria	k__norank_d__Bacteria	p__Gemmatimonadota	c__Gemmatimonadetes	o__Gemmatimonadales	f__Gemmatimonadaceae	g__Roseisolibacter	s__unclassified_g__Roseisolibacter	OTU4002	0	0	1	0	1	0	0	0	0	1	0	1	0	1	4	9
d__Bacteria	k__norank_d__Bacteria	p__Gemmatimonadota	c__Gemmatimonadetes	o__Gemmatimonadales	f__Gemmatimonadaceae	g__norank_f__Gemmatimonadaceae	s__Gemmatimonadetes_bacterium_LX87	OTU3204	0	0	0	0	0	0	0	0	0	5	4	0	0	0	0	9
d__Bacteria	k__norank_d__Bacteria	p__Verrucomicrobiota	c__Verrucomicrobiae	o__Pedosphaerales	f__Pedosphaeraceae	g__norank_f__Pedosphaeraceae	s__unclassified_g__norank_f__Pedosphaeraceae	OTU4709	0	0	0	0	2	0	0	0	0	0	0	0	0	0	0	2
d__Bacteria	k__norank_d__Bacteria	p__Proteobacteria	c__Gammaproteobacteria	o__Burkholderiales	f__Nitrosomonadaceae	g__MND1	s__metagenome_g__MND1	OTU3118	0	0	1	0	0	0	0	0	0	6	0	0	0	0	0	7
d__Bacteria	k__norank_d__Bacteria	p__Bdellovibrionota	c__Bdellovibrionia	o__Bdellovibrionales	f__Bdellovibrionaceae	g__Bdellovibrio	s__uncultured_bacterium_g__Bdellovibrio	OTU2038	0	0	0	0	0	1	1	1	5	0	0	0	0	0	0	8
d__Bacteria	k__norank_d__Bacteria	p__Chloroflexi	c__Chloroflexia	o__Chloroflexales	f__Roseiflexaceae	g__norank_f__Roseiflexaceae	s__uncultured_bacterium_g__norank_f__Roseiflexaceae	OTU749	0	2	2	0	0	0	2	0	0	1	0	0	0	0	1	8
d__Bacteria	k__norank_d__Bacteria	p__Chloroflexi	c__Chloroflexia	o__Chloroflexales	f__Roseiflexaceae	g__norank_f__Roseiflexaceae	s__uncultured_bacterium_g__norank_f__Roseiflexaceae	OTU741	27	0	41	2	0	0	0	0	0	21	0	0	0	6	4	101
d__Bacteria	k__norank_d__Bacteria	p__Planctomycetota	c__Phycisphaerae	o__Phycisphaerales	f__Phycisphaeraceae	g__SM1A02	s__metagenome_g__SM1A02	OTU5774	1	0	0	0	0	0	0	0	0	3	0	0	0	0	2	6
d__Bacteria	k__norank_d__Bacteria	p__Gemmatimonadota	c__Gemmatimonadetes	o__Gemmatimonadales	f__Gemmatimonadaceae	g__Gemmatimonas	s__uncultured_bacterium_g__Gemmatimonas	OTU3484	22	46	2	17	25	65	8	6	29	1	13	6	2	14	1	257
d__Bacteria	k__norank_d__Bacteria	p__Proteobacteria	c__Alphaproteobacteria	o__Rhizobiales	f__Hyphomicrobiaceae	g__Pedomicrobium	s__unclassified_g__Pedomicrobium	OTU821	1	0	0	0	3	1	0	1	2	1	4	1	0	0	1	15
d__Bacteria	k__norank_d__Bacteria	p__Proteobacteria	c__Gammaproteobacteria	o__Diplorickettsiales	f__Diplorickettsiaceae	g__Aquicella	s__uncultured_bacterium_g__Aquicella	OTU5243	0	0	0	0	0	0	0	0	0	0	3	0	0	1	0	4
d__Bacteria	k__norank_d__Bacteria	p__Chloroflexi	c__Chloroflexia	o__Chloroflexales	f__Roseiflexaceae	g__norank_f__Roseiflexaceae	s__unclassified_g__norank_f__Roseiflexaceae	OTU5314	0	0	0	0	0	0	0	0	0	10	0	0	0	6	3	19
d__Bacteria	k__norank_d__Bacteria	p__Myxococcota	c__Myxococcia	o__Myxococcales	f__Myxococcaceae	g__Myxococcus	s__Myxococcus_virescens	OTU3596	0	3	5	0	1	1	1	0	3	2	1	23	1	2	4	47
d__Bacteria	k__norank_d__Bacteria	p__Proteobacteria	c__Gammaproteobacteria	o__unclassified_c__Gammaproteobacteria	f__unclassified_c__Gammaproteobacteria	g__unclassified_c__Gammaproteobacteria	s__unclassified_c__Gammaproteobacteria	OTU5188	0	0	0	0	1	0	3	0	0	0	0	2	0	0	0	6
d__Bacteria	k__norank_d__Bacteria	p__Chloroflexi	c__unclassified_p__Chloroflexi	o__unclassified_p__Chloroflexi	f__unclassified_p__Chloroflexi	g__unclassified_p__Chloroflexi	s__unclassified_p__Chloroflexi	OTU2834	0	0	0	1	0	0	0	4	2	0	0	0	0	0	0	7
d__Bacteria	k__norank_d__Bacteria	p__Patescibacteria	c__Saccharimonadia	o__Saccharimonadales	f__LWQ8	g__norank_f__LWQ8	s__uncultured_bacterium_g__norank_f__LWQ8	OTU1082	7	0	5	12	6	22	3	12	16	0	0	0	0	0	1	84
d__Bacteria	k__norank_d__Bacteria	p__Myxococcota	c__Polyangia	o__Polyangiales	f__Sandaracinaceae	g__norank_f__Sandaracinaceae	s__metagenome_g__norank_f__Sandaracinaceae	OTU3271	0	0	2	0	0	0	0	0	0	6	1	0	0	0	0	9
d__Bacteria	k__norank_d__Bacteria	p__Chloroflexi	c__Ktedonobacteria	o__Ktedonobacterales	f__Ktedonobacteraceae	g__HSB_OF53-F07	s__uncultured_bacterium_g__HSB_OF53-F07	OTU4499	3	1	2	2	0	0	0	2	2	0	0	0	1	0	0	13
d__Bacteria	k__norank_d__Bacteria	p__Halanaerobiaeota	c__Halanaerobiia	o__Halanaerobiales	f__Halanaerobiaceae	g__Halocella	s__uncultured_Firmicutes_bacterium_g__Halocella	OTU204	0	1	0	0	0	0	0	0	1	0	0	0	0	0	0	2
d__Bacteria	k__norank_d__Bacteria	p__Acidobacteriota	c__Subgroup_5	o__norank_c__Subgroup_5	f__norank_o__norank_c__Subgroup_5	g__norank_f__norank_o__norank_c__Subgroup_5	s__uncultured_bacterium_g__norank_f__norank_o__norank_c__Subgroup_5	OTU3840	0	1	6	0	3	2	0	0	2	3	1	0	0	2	2	22
d__Bacteria	k__norank_d__Bacteria	p__Patescibacteria	c__Saccharimonadia	o__Saccharimonadales	f__WWH38	g__norank_f__WWH38	s__uncultured_bacterium_g__norank_f__WWH38	OTU2477	0	1	0	0	4	0	1	5	0	0	0	0	0	0	0	11
d__Bacteria	k__norank_d__Bacteria	p__Verrucomicrobiota	c__Chlamydiae	o__Chlamydiales	f__Parachlamydiaceae	g__norank_f__Parachlamydiaceae	s__metagenome_g__norank_f__Parachlamydiaceae	OTU280	2	1	0	2	0	0	0	0	0	0	0	0	0	0	0	5
d__Bacteria	k__norank_d__Bacteria	p__Verrucomicrobiota	c__Chlamydiae	o__Chlamydiales	f__Simkaniaceae	g__unclassified_f__Simkaniaceae	s__unclassified_f__Simkaniaceae	OTU3570	0	0	0	0	0	0	0	0	0	0	0	2	0	0	0	2
d__Bacteria	k__norank_d__Bacteria	p__unclassified_k__norank_d__Bacteria	c__unclassified_k__norank_d__Bacteria	o__unclassified_k__norank_d__Bacteria	f__unclassified_k__norank_d__Bacteria	g__unclassified_k__norank_d__Bacteria	s__unclassified_k__norank_d__Bacteria	OTU6246	0	0	0	0	0	0	0	0	0	1	0	0	0	0	0	1
d__Bacteria	k__norank_d__Bacteria	p__Myxococcota	c__Polyangia	o__Polyangiales	f__Sandaracinaceae	g__norank_f__Sandaracinaceae	s__uncultured_soil_bacterium_g__norank_f__Sandaracinaceae	OTU3145	0	0	1	0	1	0	0	8	0	25	10	1	0	0	0	46
d__Bacteria	k__norank_d__Bacteria	p__Proteobacteria	c__Alphaproteobacteria	o__Reyranellales	f__Reyranellaceae	g__Reyranella	s__uncultured_bacterium_g__Reyranella	OTU137	19	12	47	3	17	3	9	3	3	35	8	5	5	14	26	209
d__Bacteria	k__norank_d__Bacteria	p__Firmicutes	c__Bacilli	o__Paenibacillales	f__Paenibacillaceae	g__Paenibacillus	s__unclassified_g__Paenibacillus	OTU3002	0	0	0	0	0	0	0	0	0	1	0	0	0	0	0	1
d__Bacteria	k__norank_d__Bacteria	p__Chloroflexi	c__Anaerolineae	o__SBR1031	f__norank_o__SBR1031	g__norank_f__norank_o__SBR1031	s__unclassified_g__norank_f__norank_o__SBR1031	OTU6087	7	19	0	8	18	28	4	4	51	1	0	0	1	0	1	142
d__Bacteria	k__norank_d__Bacteria	p__Proteobacteria	c__Gammaproteobacteria	o__Diplorickettsiales	f__Diplorickettsiaceae	g__Aquicella	s__unclassified_g__Aquicella	OTU2344	0	0	3	0	0	3	2	8	0	0	0	0	0	0	0	16
d__Bacteria	k__norank_d__Bacteria	p__Proteobacteria	c__Gammaproteobacteria	o__Diplorickettsiales	f__Diplorickettsiaceae	g__Aquicella	s__unclassified_g__Aquicella	OTU2436	0	1	0	0	3	0	0	1	0	0	2	0	0	2	0	9
d__Bacteria	k__norank_d__Bacteria	p__Chloroflexi	c__Ktedonobacteria	o__Ktedonobacterales	f__Ktedonobacteraceae	g__HSB_OF53-F07	s__uncultured_bacterium_g__HSB_OF53-F07	OTU3386	0	0	0	1	0	0	0	0	0	0	2	0	0	0	0	3
d__Bacteria	k__norank_d__Bacteria	p__Dependentiae	c__Babeliae	o__Babeliales	f__norank_o__Babeliales	g__norank_f__norank_o__Babeliales	s__uncultured_bacterium_g__norank_f__norank_o__Babeliales	OTU2200	0	0	0	3	0	0	0	1	0	0	0	1	0	0	0	5
d__Bacteria	k__norank_d__Bacteria	p__Planctomycetota	c__Planctomycetes	o__Gemmatales	f__Gemmataceae	g__norank_f__Gemmataceae	s__unclassified_g__norank_f__Gemmataceae	OTU6288	0	0	2	0	3	1	0	0	0	0	0	0	0	0	1	7
d__Bacteria	k__norank_d__Bacteria	p__Verrucomicrobiota	c__Verrucomicrobiae	o__Verrucomicrobiales	f__Verrucomicrobiaceae	g__norank_f__Verrucomicrobiaceae	s__uncultured_bacterium_g__norank_f__Verrucomicrobiaceae	OTU5676	0	0	0	0	0	0	0	1	0	0	0	0	0	0	0	1
d__Bacteria	k__norank_d__Bacteria	p__Proteobacteria	c__Gammaproteobacteria	o__Burkholderiales	f__Comamonadaceae	g__unclassified_f__Comamonadaceae	s__unclassified_f__Comamonadaceae	OTU3075	0	0	1	0	0	0	1	0	4	19	0	1	0	2	7	35
d__Bacteria	k__norank_d__Bacteria	p__Planctomycetota	c__Phycisphaerae	o__Phycisphaerales	f__Phycisphaeraceae	g__norank_f__Phycisphaeraceae	s__metagenome_g__norank_f__Phycisphaeraceae	OTU3222	0	0	0	0	0	0	0	0	0	1	0	0	0	0	0	1
d__Bacteria	k__norank_d__Bacteria	p__Verrucomicrobiota	c__Verrucomicrobiae	o__Opitutales	f__Opitutaceae	g__unclassified_f__Opitutaceae	s__unclassified_f__Opitutaceae	OTU1506	0	0	0	0	1	1	0	0	0	0	0	0	0	0	0	2
d__Bacteria	k__norank_d__Bacteria	p__Armatimonadota	c__Armatimonadia	o__Armatimonadales	f__norank_o__Armatimonadales	g__norank_f__norank_o__Armatimonadales	s__uncultured_bacterium_g__norank_f__norank_o__Armatimonadales	OTU6479	6	25	9	9	1	4	2	12	0	1	0	0	1	1	0	71
d__Bacteria	k__norank_d__Bacteria	p__Planctomycetota	c__Planctomycetes	o__Gemmatales	f__Gemmataceae	g__norank_f__Gemmataceae	s__uncultured_bacterium_g__norank_f__Gemmataceae	OTU728	1	0	2	1	0	0	0	2	0	0	0	0	2	0	0	8
d__Bacteria	k__norank_d__Bacteria	p__Gemmatimonadota	c__Gemmatimonadetes	o__Gemmatimonadales	f__Gemmatimonadaceae	g__norank_f__Gemmatimonadaceae	s__uncultured_Gemmatimonas_sp._g__norank_f__Gemmatimonadaceae	OTU5269	0	1	0	2	5	3	0	1	2	0	6	2	7	19	0	48
d__Bacteria	k__norank_d__Bacteria	p__Bdellovibrionota	c__Bdellovibrionia	o__Bdellovibrionales	f__Bdellovibrionaceae	g__OM27_clade	s__metagenome_g__OM27_clade	OTU3160	0	0	0	0	0	0	0	0	0	2	0	0	0	0	0	2
d__Bacteria	k__norank_d__Bacteria	p__Firmicutes	c__Bacilli	o__Paenibacillales	f__Paenibacillaceae	g__Paenibacillus	s__Paenibacillus_sp._32O-W	OTU3634	0	0	0	0	0	0	0	0	0	0	1	1	0	0	0	2
d__Bacteria	k__norank_d__Bacteria	p__Acidobacteriota	c__Acidobacteriae	o__Bryobacterales	f__Bryobacteraceae	g__Bryobacter	s__uncultured_Acidobacteria_bacterium_g__Bryobacter	OTU2216	9	8	11	4	11	8	2	0	10	23	40	49	7	18	5	205
d__Bacteria	k__norank_d__Bacteria	p__Bacteroidota	c__Bacteroidia	o__Sphingobacteriales	f__AKYH767	g__norank_f__AKYH767	s__uncultured_bacterium_g__norank_f__AKYH767	OTU5560	0	0	13	2	0	0	0	0	0	6	3	0	0	0	3	27
d__Bacteria	k__norank_d__Bacteria	p__Planctomycetota	c__Planctomycetes	o__Isosphaerales	f__Isosphaeraceae	g__norank_f__Isosphaeraceae	s__unclassified_g__norank_f__Isosphaeraceae	OTU1642	0	0	0	0	2	2	3	1	4	0	0	0	2	0	0	14
d__Bacteria	k__norank_d__Bacteria	p__Spirochaetota	c__Spirochaetia	o__Spirochaetales	f__Spirochaetaceae	g__Spirochaeta	s__unclassified_g__Spirochaeta	OTU3835	0	0	0	0	0	0	0	0	0	0	0	0	1	0	0	1
d__Bacteria	k__norank_d__Bacteria	p__Chloroflexi	c__Ktedonobacteria	o__Ktedonobacterales	f__Ktedonobacteraceae	g__unclassified_f__Ktedonobacteraceae	s__unclassified_f__Ktedonobacteraceae	OTU59	2	0	0	3	0	0	0	0	0	0	0	0	0	0	0	5
d__Bacteria	k__norank_d__Bacteria	p__Chloroflexi	c__Ktedonobacteria	o__Ktedonobacterales	f__Ktedonobacteraceae	g__1921-3	s__uncultured_bacterium_g__1921-3	OTU4472	0	2	1	0	2	0	0	0	0	0	0	0	0	0	0	5
d__Bacteria	k__norank_d__Bacteria	p__Chloroflexi	c__Ktedonobacteria	o__Ktedonobacterales	f__Ktedonobacteraceae	g__unclassified_f__Ktedonobacteraceae	s__unclassified_f__Ktedonobacteraceae	OTU978	0	0	0	8	0	0	0	0	2	0	0	0	0	0	0	10
d__Bacteria	k__norank_d__Bacteria	p__unclassified_k__norank_d__Bacteria	c__unclassified_k__norank_d__Bacteria	o__unclassified_k__norank_d__Bacteria	f__unclassified_k__norank_d__Bacteria	g__unclassified_k__norank_d__Bacteria	s__unclassified_k__norank_d__Bacteria	OTU1882	0	0	0	0	0	0	9	0	0	0	0	0	0	0	0	9
d__Bacteria	k__norank_d__Bacteria	p__Proteobacteria	c__Alphaproteobacteria	o__Elsterales	f__norank_o__Elsterales	g__norank_f__norank_o__Elsterales	s__unclassified_g__norank_f__norank_o__Elsterales	OTU4980	0	1	2	44	39	60	12	28	49	0	7	0	11	1	0	254
d__Bacteria	k__norank_d__Bacteria	p__Myxococcota	c__Polyangia	o__Polyangiales	f__Polyangiaceae	g__Pajaroellobacter	s__uncultured_bacterium_g__Pajaroellobacter	OTU471	0	6	3	2	4	4	1	6	3	5	3	3	0	8	1	49
d__Bacteria	k__norank_d__Bacteria	p__Chloroflexi	c__Ktedonobacteria	o__Ktedonobacterales	f__Ktedonobacteraceae	g__unclassified_f__Ktedonobacteraceae	s__unclassified_f__Ktedonobacteraceae	OTU972	0	14	3	1	0	1	0	7	30	0	0	0	0	0	0	56
d__Bacteria	k__norank_d__Bacteria	p__Acidobacteriota	c__Acidobacteriae	o__Acidobacteriales	f__Acidobacteriaceae_Subgroup_1	g__Acidipila	s__unclassified_g__Acidipila	OTU1258	0	0	0	1	13	2	2	2	0	0	1	1	0	0	1	23
d__Bacteria	k__norank_d__Bacteria	p__Patescibacteria	c__Saccharimonadia	o__Saccharimonadales	f__LWQ8	g__norank_f__LWQ8	s__unclassified_g__norank_f__LWQ8	OTU3625	0	0	0	0	0	0	0	0	0	0	4	3	0	1	0	8
d__Bacteria	k__norank_d__Bacteria	p__Verrucomicrobiota	c__Verrucomicrobiae	o__Chthoniobacterales	f__Chthoniobacteraceae	g__Chthoniobacter	s__uncultured_bacterium_g__Chthoniobacter	OTU5840	0	0	0	0	0	0	1	0	0	0	0	1	0	0	0	2
d__Bacteria	k__norank_d__Bacteria	p__Chloroflexi	c__Ktedonobacteria	o__Ktedonobacterales	f__Ktedonobacteraceae	g__FCPS473	s__unclassified_g__FCPS473	OTU3664	0	0	0	0	0	0	1	0	1	0	0	10	0	1	0	13
d__Bacteria	k__norank_d__Bacteria	p__Myxococcota	c__Polyangia	o__Haliangiales	f__Haliangiaceae	g__Haliangium	s__uncultured_Kofleriaceae_bacterium_g__Haliangium	OTU3752	0	0	2	0	1	0	1	0	0	4	0	2	2	2	0	14
d__Bacteria	k__norank_d__Bacteria	p__Acidobacteriota	c__Acidobacteriae	o__Acidobacteriales	f__Acidobacteriaceae_Subgroup_1	g__unclassified_f__Acidobacteriaceae_Subgroup_1	s__unclassified_f__Acidobacteriaceae_Subgroup_1	OTU4934	0	0	0	0	1	0	0	0	0	0	0	0	2	0	0	3
d__Bacteria	k__norank_d__Bacteria	p__Myxococcota	c__Myxococcia	o__Myxococcales	f__Anaeromyxobacteraceae	g__Anaeromyxobacter	s__metagenome_g__Anaeromyxobacter	OTU3321	0	0	1	0	2	2	3	1	6	0	3	1	0	0	0	19
d__Bacteria	k__norank_d__Bacteria	p__Bdellovibrionota	c__Oligoflexia	o__0319-6G20	f__norank_o__0319-6G20	g__norank_f__norank_o__0319-6G20	s__unclassified_g__norank_f__norank_o__0319-6G20	OTU510	0	0	13	0	0	0	0	0	0	0	0	0	0	0	0	13
d__Bacteria	k__norank_d__Bacteria	p__Patescibacteria	c__Saccharimonadia	o__Saccharimonadales	f__norank_o__Saccharimonadales	g__norank_f__norank_o__Saccharimonadales	s__unclassified_g__norank_f__norank_o__Saccharimonadales	OTU5736	1	0	1	0	0	0	0	0	2	1	4	5	1	0	0	15
d__Bacteria	k__norank_d__Bacteria	p__Myxococcota	c__Myxococcia	o__Myxococcales	f__Myxococcaceae	g__P3OB-42	s__uncultured_bacterium_g__P3OB-42	OTU2796	0	0	0	0	0	0	0	0	2	0	0	0	0	0	0	2
d__Bacteria	k__norank_d__Bacteria	p__Actinobacteriota	c__Actinobacteria	o__unclassified_c__Actinobacteria	f__unclassified_c__Actinobacteria	g__unclassified_c__Actinobacteria	s__unclassified_c__Actinobacteria	OTU1673	0	7	11	6	1	6	4	50	2	0	0	1	3	0	0	91
d__Bacteria	k__norank_d__Bacteria	p__Proteobacteria	c__Gammaproteobacteria	o__Diplorickettsiales	f__Diplorickettsiaceae	g__norank_f__Diplorickettsiaceae	s__uncultured_Coxiellaceae_bacterium_g__norank_f__Diplorickettsiaceae	OTU1514	0	0	0	0	0	2	0	0	0	0	0	0	0	0	0	2
d__Bacteria	k__norank_d__Bacteria	p__Bacteroidota	c__Bacteroidia	o__Chitinophagales	f__Chitinophagaceae	g__norank_f__Chitinophagaceae	s__uncultured_Sphingobacteriales_bacterium_g__norank_f__Chitinophagaceae	OTU6211	0	0	0	0	0	0	0	0	0	16	10	20	0	1	0	47
d__Bacteria	k__norank_d__Bacteria	p__Proteobacteria	c__Gammaproteobacteria	o__unclassified_c__Gammaproteobacteria	f__unclassified_c__Gammaproteobacteria	g__unclassified_c__Gammaproteobacteria	s__unclassified_c__Gammaproteobacteria	OTU3057	0	0	0	0	0	0	0	0	0	2	0	0	0	0	0	2
d__Bacteria	k__norank_d__Bacteria	p__Firmicutes	c__Desulfitobacteriia	o__Desulfitobacteriales	f__Heliobacteriaceae	g__norank_f__Heliobacteriaceae	s__uncultured_bacterium_g__norank_f__Heliobacteriaceae	OTU603	0	0	3	0	0	0	0	0	0	0	0	0	0	0	0	3
d__Bacteria	k__norank_d__Bacteria	p__Proteobacteria	c__Alphaproteobacteria	o__Rhizobiales	f__Rhizobiales_Incertae_Sedis	g__Bauldia	s__uncultured_bacterium_g__Bauldia	OTU4941	7	3	10	0	10	1	0	0	0	24	9	3	7	3	20	97
d__Bacteria	k__norank_d__Bacteria	p__Actinobacteriota	c__Actinobacteria	o__Corynebacteriales	f__Corynebacteriaceae	g__Lawsonella	s__unclassified_g__Lawsonella	OTU5145	4	3	22	3	28	2	5	2	3	0	86	0	6	3	1	168
d__Bacteria	k__norank_d__Bacteria	p__Actinobacteriota	c__Thermoleophilia	o__Gaiellales	f__norank_o__Gaiellales	g__norank_f__norank_o__Gaiellales	s__bacterium_Ellin6515	OTU5525	20	15	4	3	3	2	1	0	0	13	3	10	0	17	2	93
d__Bacteria	k__norank_d__Bacteria	p__Firmicutes	c__Clostridia	o__Lachnospirales	f__Lachnospiraceae	g__Catonella	s__uncultured_bacterium_g__Catonella	OTU3445	0	0	0	0	0	0	0	0	0	0	6	0	0	0	0	6
d__Bacteria	k__norank_d__Bacteria	p__Myxococcota	c__Myxococcia	o__Myxococcales	f__Myxococcaceae	g__unclassified_f__Myxococcaceae	s__unclassified_f__Myxococcaceae	OTU5885	0	1	1	2	0	0	0	1	2	1	0	1	0	0	2	11
d__Bacteria	k__norank_d__Bacteria	p__Proteobacteria	c__Gammaproteobacteria	o__Burkholderiales	f__Oxalobacteraceae	g__Massilia	s__Massilia_albidiflava	OTU3545	0	0	1	0	0	0	0	0	1	1	267	2	0	0	0	272
d__Bacteria	k__norank_d__Bacteria	p__Chloroflexi	c__Ktedonobacteria	o__Ktedonobacterales	f__JG30-KF-AS9	g__norank_f__JG30-KF-AS9	s__uncultured_bacterium_g__norank_f__JG30-KF-AS9	OTU4869	0	2	0	0	0	0	0	0	1	0	25	2	3	0	0	33
d__Bacteria	k__norank_d__Bacteria	p__Bacteroidota	c__Bacteroidia	o__Bacteroidales	f__Porphyromonadaceae	g__Porphyromonas	s__Porphyromonas_uenonis	OTU5106	0	0	1	0	0	0	0	0	0	0	1	0	0	0	0	2
d__Bacteria	k__norank_d__Bacteria	p__Actinobacteriota	c__Actinobacteria	o__Corynebacteriales	f__Mycobacteriaceae	g__Mycobacterium	s__unclassified_g__Mycobacterium	OTU1584	60	57	41	51	39	118	112	137	66	2	5	9	42	8	2	749
d__Bacteria	k__norank_d__Bacteria	p__Acidobacteriota	c__Acidobacteriae	o__Bryobacterales	f__Bryobacteraceae	g__Bryobacter	s__unclassified_g__Bryobacter	OTU5032	178	181	131	316	171	383	406	257	371	38	43	127	269	79	12	2962
d__Bacteria	k__norank_d__Bacteria	p__Proteobacteria	c__Alphaproteobacteria	o__Paracaedibacterales	f__Paracaedibacteraceae	g__Candidatus_Paracaedibacter	s__unclassified_g__Candidatus_Paracaedibacter	OTU5329	0	0	0	0	1	1	0	3	0	0	0	0	1	2	0	8
d__Bacteria	k__norank_d__Bacteria	p__Firmicutes	c__Bacilli	o__Entomoplasmatales	f__type_III	g__norank_f__type_III	s__uncultured_Mollicutes_bacterium_g__norank	OTU3485	0	0	0	0	0	0	0	0	0	0	5	0	0	0	0	5
d__Bacteria	k__norank_d__Bacteria	p__Patescibacteria	c__Parcubacteria	o__Candidatus_Jorgensenbacteria	f__norank_o__Candidatus_Jorgensenbacteria	g__norank_f__norank_o__Candidatus_Jorgensenbacteria	s__Candidatus_Adlerbacteria_bacterium_GW2011_GWC1_50_9	OTU4806	0	0	0	0	0	0	0	0	0	0	0	0	0	1	0	1
d__Bacteria	k__norank_d__Bacteria	p__Elusimicrobiota	c__Elusimicrobia	o__Lineage_IV	f__norank_o__Lineage_IV	g__norank_f__norank_o__Lineage_IV	s__unclassified_g__norank_f__norank_o__Lineage_IV	OTU2811	0	6	0	0	1	2	2	0	8	0	0	2	1	0	0	22
d__Bacteria	k__norank_d__Bacteria	p__Actinobacteriota	c__Acidimicrobiia	o__norank_c__Acidimicrobiia	f__norank_o__norank_c__Acidimicrobiia	g__norank_f__norank_o__norank_c__Acidimicrobiia	s__uncultured_bacterium_g__norank_f__norank_o__norank_c__Acidimicrobiia	OTU4187	0	0	0	0	0	0	0	0	0	8	0	0	0	0	1	9
d__Bacteria	k__norank_d__Bacteria	p__Bdellovibrionota	c__Bdellovibrionia	o__Bdellovibrionales	f__Bdellovibrionaceae	g__Bdellovibrio	s__unclassified_g__Bdellovibrio	OTU592	0	3	7	0	0	5	0	1	0	0	0	1	0	0	0	17
d__Bacteria	k__norank_d__Bacteria	p__Chloroflexi	c__Chloroflexia	o__Thermomicrobiales	f__JG30-KF-CM45	g__norank_f__JG30-KF-CM45	s__uncultured_Thermomicrobium_sp._g__norank_f__JG30-KF-CM45	OTU239	0	10	0	0	0	0	0	0	0	1	0	0	0	1	0	12
d__Bacteria	k__norank_d__Bacteria	p__Proteobacteria	c__Alphaproteobacteria	o__Rhizobiales	f__Beijerinckiaceae	g__Camelimonas	s__uncultured_bacterium_g__Camelimonas	OTU350	0	1	2	0	0	0	0	0	0	1	0	0	0	0	0	4
d__Bacteria	k__norank_d__Bacteria	p__Bacteroidota	c__Bacteroidia	o__Sphingobacteriales	f__Sphingobacteriaceae	g__Olivibacter	s__unclassified_g__Olivibacter	OTU5377	0	0	0	0	0	1	1	0	0	0	0	0	0	10	0	12
d__Bacteria	k__norank_d__Bacteria	p__Chloroflexi	c__Ktedonobacteria	o__Ktedonobacterales	f__Ktedonobacteraceae	g__1921-3	s__uncultured_Ktedonobacter_sp._g__1921-3	OTU1108	0	3	2	26	0	0	0	3	2	0	0	0	0	0	0	36
d__Bacteria	k__norank_d__Bacteria	p__Actinobacteriota	c__Actinobacteria	o__Corynebacteriales	f__Nocardiaceae	g__Rhodococcus	s__Rhodococcus_hoagii	OTU895	9	38	263	3	13	3	9	4	2	13	9	9	6	5	30	416
d__Bacteria	k__norank_d__Bacteria	p__Chloroflexi	c__OLB14	o__norank_c__OLB14	f__norank_o__norank_c__OLB14	g__norank_f__norank_o__norank_c__OLB14	s__unclassified_g__norank_f__norank_o__norank_c__OLB14	OTU3898	7	0	0	0	0	0	0	0	0	0	3	0	0	0	0	10
d__Bacteria	k__norank_d__Bacteria	p__Proteobacteria	c__Alphaproteobacteria	o__Rhizobiales	f__Beijerinckiaceae	g__Methylobacterium-Methylorubrum	s__Methylobacterium_brachiatum	OTU5004	1	24	6	5	17	5	5	23	2	8	19	4	9	16	8	152
d__Bacteria	k__norank_d__Bacteria	p__unclassified_k__norank_d__Bacteria	c__unclassified_k__norank_d__Bacteria	o__unclassified_k__norank_d__Bacteria	f__unclassified_k__norank_d__Bacteria	g__unclassified_k__norank_d__Bacteria	s__unclassified_k__norank_d__Bacteria	OTU5371	0	0	0	0	0	0	0	0	0	0	0	0	0	2	0	2
d__Bacteria	k__norank_d__Bacteria	p__Proteobacteria	c__Alphaproteobacteria	o__Rickettsiales	f__SM2D12	g__norank_f__SM2D12	s__unclassified_g__norank_f__SM2D12	OTU5794	0	0	0	0	0	0	0	0	0	1	0	0	0	0	0	1
d__Bacteria	k__norank_d__Bacteria	p__Patescibacteria	c__Saccharimonadia	o__Saccharimonadales	f__unclassified_o__Saccharimonadales	g__unclassified_o__Saccharimonadales	s__unclassified_o__Saccharimonadales	OTU129	3	0	0	0	0	0	0	0	0	0	0	0	0	0	0	3
d__Bacteria	k__norank_d__Bacteria	p__Actinobacteriota	c__Acidimicrobiia	o__Microtrichales	f__norank_o__Microtrichales	g__norank_f__norank_o__Microtrichales	s__metagenome_g__norank_f__norank_o__Microtrichales	OTU275	0	2	0	0	0	0	0	0	0	0	0	0	0	0	0	2
d__Bacteria	k__norank_d__Bacteria	p__Planctomycetota	c__Planctomycetes	o__Gemmatales	f__Gemmataceae	g__norank_f__Gemmataceae	s__uncultured_bacterium_g__norank_f__Gemmataceae	OTU6469	3	1	0	0	0	1	0	0	0	0	0	0	0	0	0	5
d__Bacteria	k__norank_d__Bacteria	p__Proteobacteria	c__Gammaproteobacteria	o__Burkholderiales	f__Sutterellaceae	g__AAP99	s__metagenome_g__AAP99	OTU1784	20	0	3	0	0	0	0	0	0	0	0	0	0	0	4	27
d__Bacteria	k__norank_d__Bacteria	p__Acidobacteriota	c__Acidobacteriae	o__PAUC26f	f__norank_o__PAUC26f	g__norank_f__norank_o__PAUC26f	s__uncultured_bacterium_g__norank_f__norank_o__PAUC26f	OTU4728	0	0	0	0	0	0	1	1	0	0	2	0	0	0	0	4
d__Bacteria	k__norank_d__Bacteria	p__Planctomycetota	c__OM190	o__norank_c__OM190	f__norank_o__norank_c__OM190	g__norank_f__norank_o__norank_c__OM190	s__uncultured_bacterium_g__norank_f__norank_o__norank_c__OM190	OTU3119	0	0	0	0	0	0	0	0	0	6	0	0	0	0	0	6
d__Bacteria	k__norank_d__Bacteria	p__Bacteroidota	c__Bacteroidia	o__Sphingobacteriales	f__Sphingobacteriaceae	g__unclassified_f__Sphingobacteriaceae	s__unclassified_f__Sphingobacteriaceae	OTU5262	0	2	0	0	0	3	0	0	2	0	0	0	0	2	0	9
d__Bacteria	k__norank_d__Bacteria	p__Firmicutes	c__Bacilli	o__Bacillales	f__Bacillaceae	g__Bacillus	s__Bacillus_cellulasensis	OTU5360	2	7	3	1	1	13	6	0	3	10	0	1	1	66	62	176
d__Bacteria	k__norank_d__Bacteria	p__Proteobacteria	c__Gammaproteobacteria	o__Salinisphaerales	f__Solimonadaceae	g__Nevskia	s__Nevskia_terrae	OTU1839	53	119	16	94	42	40	61	13	6	1	0	10	8	4	1	468
d__Bacteria	k__norank_d__Bacteria	p__Proteobacteria	c__Alphaproteobacteria	o__Elsterales	f__norank_o__Elsterales	g__norank_f__norank_o__Elsterales	s__uncultured_Alphaproteobacteria_bacterium_g__norank_f__norank_o__Elsterales	OTU1829	4	1	2	0	33	22	38	26	12	0	0	0	48	5	2	193
d__Bacteria	k__norank_d__Bacteria	p__Gemmatimonadota	c__Gemmatimonadetes	o__Gemmatimonadales	f__Gemmatimonadaceae	g__unclassified_f__Gemmatimonadaceae	s__unclassified_f__Gemmatimonadaceae	OTU6368	16	55	16	10	12	33	4	4	45	7	1	16	2	31	2	254
d__Bacteria	k__norank_d__Bacteria	p__Actinobacteriota	c__Actinobacteria	o__Micromonosporales	f__Micromonosporaceae	g__unclassified_f__Micromonosporaceae	s__unclassified_f__Micromonosporaceae	OTU396	36	65	71	3	10	3	3	1	7	30	65	18	11	24	21	368
d__Bacteria	k__norank_d__Bacteria	p__Bacteroidota	c__Bacteroidia	o__Sphingobacteriales	f__Sphingobacteriaceae	g__Pedobacter	s__unclassified_g__Pedobacter	OTU4350	0	0	0	0	0	0	0	0	1	9	0	0	0	1	0	11
d__Bacteria	k__norank_d__Bacteria	p__Actinobacteriota	c__Thermoleophilia	o__Solirubrobacterales	f__Solirubrobacteraceae	g__Conexibacter	s__uncultured_bacterium_g__Conexibacter	OTU3136	29	2	3	3	6	3	9	3	4	16	12	6	2	4	2	104
d__Bacteria	k__norank_d__Bacteria	p__Planctomycetota	c__OM190	o__norank_c__OM190	f__norank_o__norank_c__OM190	g__norank_f__norank_o__norank_c__OM190	s__uncultured_bacterium_g__norank_f__norank_o__norank_c__OM190	OTU6093	2	1	0	0	1	0	0	0	0	0	1	0	0	0	1	6
d__Bacteria	k__norank_d__Bacteria	p__Firmicutes	c__Clostridia	o__Lachnospirales	f__Lachnospiraceae	g__Epulopiscium	s__uncultured_bacterium_g__Epulopiscium	OTU956	2	9	0	1	0	2	1	0	5	0	0	0	0	0	0	20
d__Bacteria	k__norank_d__Bacteria	p__Myxococcota	c__Polyangia	o__Blfdi19	f__norank_o__Blfdi19	g__norank_f__norank_o__Blfdi19	s__unclassified_g__norank_f__norank_o__Blfdi19	OTU364	0	0	2	0	0	0	0	0	0	0	0	0	0	0	1	3
d__Bacteria	k__norank_d__Bacteria	p__Proteobacteria	c__Gammaproteobacteria	o__unclassified_c__Gammaproteobacteria	f__unclassified_c__Gammaproteobacteria	g__unclassified_c__Gammaproteobacteria	s__unclassified_c__Gammaproteobacteria	OTU1612	0	0	2	0	0	0	1	0	0	0	0	0	0	0	0	3
d__Bacteria	k__norank_d__Bacteria	p__Proteobacteria	c__Gammaproteobacteria	o__Ectothiorhodospirales	f__Thioalkalispiraceae	g__norank_f__Thioalkalispiraceae	s__unclassified_g__norank_f__Thioalkalispiraceae	OTU3102	0	0	0	0	0	0	0	0	0	3	0	0	0	0	0	3
d__Bacteria	k__norank_d__Bacteria	p__Chloroflexi	c__Anaerolineae	o__SBR1031	f__A4b	g__norank_f__A4b	s__uncultured_bacterium_g__norank_f__A4b	OTU3166	0	0	1	0	0	0	0	0	0	2	0	0	1	1	0	5
d__Bacteria	k__norank_d__Bacteria	p__Planctomycetota	c__Planctomycetes	o__Gemmatales	f__Gemmataceae	g__norank_f__Gemmataceae	s__unclassified_g__norank_f__Gemmataceae	OTU1709	0	0	1	0	0	0	0	0	0	0	0	0	0	0	0	1
d__Bacteria	k__norank_d__Bacteria	p__Verrucomicrobiota	c__Chlamydiae	o__Chlamydiales	f__Simkaniaceae	g__norank_f__Simkaniaceae	s__unclassified_g__norank_f__Simkaniaceae	OTU2124	0	0	0	0	0	0	0	0	2	0	2	0	0	0	0	4
d__Bacteria	k__norank_d__Bacteria	p__Chloroflexi	c__Ktedonobacteria	o__Ktedonobacterales	f__Ktedonobacteraceae	g__HSB_OF53-F07	s__uncultured_bacterium_g__HSB_OF53-F07	OTU246	0	7	2	0	2	2	0	0	1	1	0	1	0	0	0	16
d__Bacteria	k__norank_d__Bacteria	p__Dependentiae	c__Babeliae	o__Babeliales	f__Vermiphilaceae	g__norank_f__Vermiphilaceae	s__uncultured_bacterium_g__norank_f__Vermiphilaceae	OTU2369	0	0	2	0	0	1	3	12	2	0	0	0	0	0	0	20
d__Bacteria	k__norank_d__Bacteria	p__Chloroflexi	c__Chloroflexia	o__Thermomicrobiales	f__AKYG1722	g__norank_f__AKYG1722	s__unclassified_g__norank_f__AKYG1722	OTU5896	0	0	0	0	0	0	0	0	0	1	0	0	0	0	0	1
d__Bacteria	k__norank_d__Bacteria	p__Proteobacteria	c__Alphaproteobacteria	o__Elsterales	f__norank_o__Elsterales	g__norank_f__norank_o__Elsterales	s__unclassified_g__norank_f__norank_o__Elsterales	OTU2110	27	102	10	39	73	52	47	13	94	12	47	28	12	46	2	604
d__Bacteria	k__norank_d__Bacteria	p__Bacteroidota	c__Bacteroidia	o__Sphingobacteriales	f__CWT_CU03-E12	g__norank_f__CWT_CU03-E12	s__uncultured_soil_bacterium_g__norank_f__CWT_CU03-E12	OTU4524	0	0	0	0	0	2	0	0	1	0	0	0	0	0	0	3
d__Bacteria	k__norank_d__Bacteria	p__Acidobacteriota	c__Blastocatellia	o__Blastocatellales	f__Blastocatellaceae	g__Blastocatella	s__uncultured_bacterium_g__Blastocatella	OTU1111	0	1	0	3	0	0	0	0	0	1	0	0	0	5	0	10
d__Bacteria	k__norank_d__Bacteria	p__Chloroflexi	c__Ktedonobacteria	o__Ktedonobacterales	f__Ktedonobacteraceae	g__1921-2	s__uncultured_bacterium_g__1921-2	OTU1205	0	0	0	0	6	0	0	0	0	0	0	0	0	0	0	6
d__Bacteria	k__norank_d__Bacteria	p__Chloroflexi	c__Ktedonobacteria	o__Ktedonobacterales	f__Ktedonobacteraceae	g__HSB_OF53-F07	s__uncultured_bacterium_g__HSB_OF53-F07	OTU1030	5	6	1	18	5	14	5	12	23	0	1	0	2	0	0	92
d__Bacteria	k__norank_d__Bacteria	p__Acidobacteriota	c__Acidobacteriae	o__Bryobacterales	f__Bryobacteraceae	g__Bryobacter	s__unclassified_g__Bryobacter	OTU5382	5	0	1	1	0	0	0	0	0	0	0	0	0	4	4	15
d__Bacteria	k__norank_d__Bacteria	p__Chloroflexi	c__Ktedonobacteria	o__Ktedonobacterales	f__Ktedonobacteraceae	g__unclassified_f__Ktedonobacteraceae	s__unclassified_f__Ktedonobacteraceae	OTU4848	1	4	5	2	15	10	34	5	9	0	13	2	4	3	0	107
d__Bacteria	k__norank_d__Bacteria	p__Armatimonadota	c__Chthonomonadetes	o__Chthonomonadales	f__Chthonomonadaceae	g__Chthonomonas	s__unclassified_g__Chthonomonas	OTU864	0	1	0	0	0	0	0	1	0	0	0	0	0	0	0	2
d__Bacteria	k__norank_d__Bacteria	p__Bdellovibrionota	c__Oligoflexia	o__Silvanigrellales	f__Silvanigrellaceae	g__Silvanigrella	s__metagenome_g__Silvanigrella	OTU2105	0	0	0	0	0	0	4	0	0	0	0	0	0	0	0	4
d__Bacteria	k__norank_d__Bacteria	p__Chloroflexi	c__Anaerolineae	o__SBR1031	f__norank_o__SBR1031	g__norank_f__norank_o__SBR1031	s__uncultured_Gemmatimonadetes_bacterium_g__norank_f__norank	OTU4009	0	0	0	0	0	0	0	0	4	0	0	0	0	7	0	11
d__Bacteria	k__norank_d__Bacteria	p__Proteobacteria	c__Alphaproteobacteria	o__Elsterales	f__norank_o__Elsterales	g__norank_f__norank_o__Elsterales	s__unclassified_g__norank_f__norank_o__Elsterales	OTU825	3	2	1	0	0	1	1	0	0	1	0	0	0	0	0	9
d__Bacteria	k__norank_d__Bacteria	p__Proteobacteria	c__Gammaproteobacteria	o__Diplorickettsiales	f__Diplorickettsiaceae	g__Aquicella	s__unclassified_g__Aquicella	OTU3750	0	0	0	0	0	0	0	0	3	0	0	5	4	0	0	12
d__Bacteria	k__norank_d__Bacteria	p__Bacteroidota	c__Bacteroidia	o__Sphingobacteriales	f__env.OPS_17	g__norank_f__env.OPS_17	s__unclassified_g__norank_f__env.OPS_17	OTU3505	0	0	2	0	0	0	0	0	0	1	4	0	0	0	3	10
d__Bacteria	k__norank_d__Bacteria	p__Verrucomicrobiota	c__Chlamydiae	o__Chlamydiales	f__Simkaniaceae	g__norank_f__Simkaniaceae	s__uncultured_bacterium_g__norank_f__Simkaniaceae	OTU6491	0	0	0	0	0	0	0	0	0	0	0	0	2	0	0	2
d__Bacteria	k__norank_d__Bacteria	p__Chloroflexi	c__Chloroflexia	o__Chloroflexales	f__Herpetosiphonaceae	g__Herpetosiphon	s__uncultured_Chloroflexi_bacterium_g__Herpetosiphon	OTU91	5	0	0	0	0	0	0	0	0	1	0	0	0	0	0	6
d__Bacteria	k__norank_d__Bacteria	p__Actinobacteriota	c__Actinobacteria	o__Micromonosporales	f__Micromonosporaceae	g__Actinoplanes	s__uncultured_bacterium_g__Actinoplanes	OTU3366	14	29	2	0	2	1	2	1	1	12	968	6	0	2	1	1041
d__Bacteria	k__norank_d__Bacteria	p__Proteobacteria	c__Gammaproteobacteria	o__Pseudomonadales	f__Moraxellaceae	g__Enhydrobacter	s__Moraxella_osloensis_g__Enhydrobacter	OTU468	13	27	55	8	42	3	28	11	18	0	27	0	66	2	6	306
d__Bacteria	k__norank_d__Bacteria	p__Cyanobacteria	c__Cyanobacteriia	o__Chloroplast	f__norank_o__Chloroplast	g__norank_f__norank_o__Chloroplast	s__Tetradesmus_obliquus	OTU892	1	0	0	0	0	2	9	7	1	0	0	0	2	0	0	22
d__Bacteria	k__norank_d__Bacteria	p__Planctomycetota	c__Planctomycetes	o__Isosphaerales	f__Isosphaeraceae	g__unclassified_f__Isosphaeraceae	s__unclassified_f__Isosphaeraceae	OTU6029	0	0	0	2	13	1	1	6	6	0	0	2	1	2	1	35
d__Bacteria	k__norank_d__Bacteria	p__Dependentiae	c__Babeliae	o__Babeliales	f__UBA12411	g__norank_f__UBA12411	s__unclassified_g__norank_f__UBA12411	OTU5813	0	0	1	0	0	0	0	0	0	0	0	0	0	0	0	1
d__Bacteria	k__norank_d__Bacteria	p__Dependentiae	c__Babeliae	o__Babeliales	f__Vermiphilaceae	g__norank_f__Vermiphilaceae	s__metagenome_g__norank_f__Vermiphilaceae	OTU482	0	5	10	0	0	0	2	0	2	1	9	0	2	0	1	32
d__Bacteria	k__norank_d__Bacteria	p__Actinobacteriota	c__Thermoleophilia	o__Solirubrobacterales	f__Solirubrobacteraceae	g__norank_f__Solirubrobacteraceae	s__unclassified_g__norank_f__Solirubrobacteraceae	OTU1974	0	0	0	0	2	4	31	0	1	0	0	0	0	0	0	38
d__Bacteria	k__norank_d__Bacteria	p__Proteobacteria	c__Alphaproteobacteria	o__Acetobacterales	f__Acetobacteraceae	g__unclassified_f__Acetobacteraceae	s__unclassified_f__Acetobacteraceae	OTU2023	30	74	27	133	42	88	76	99	74	5	8	5	72	10	2	745
d__Bacteria	k__norank_d__Bacteria	p__Verrucomicrobiota	c__Verrucomicrobiae	o__Chthoniobacterales	f__Chthoniobacteraceae	g__Chthoniobacter	s__unclassified_g__Chthoniobacter	OTU5869	11	13	3	6	0	2	0	2	0	0	0	0	0	0	0	37
d__Bacteria	k__norank_d__Bacteria	p__Dependentiae	c__Babeliae	o__Babeliales	f__Vermiphilaceae	g__norank_f__Vermiphilaceae	s__unclassified_g__norank_f__Vermiphilaceae	OTU3998	0	0	0	0	0	0	0	0	0	1	0	0	0	0	0	1
d__Bacteria	k__norank_d__Bacteria	p__Proteobacteria	c__Gammaproteobacteria	o__Salinisphaerales	f__Solimonadaceae	g__Polycyclovorans	s__uncultured_bacterium_g__Polycyclovorans	OTU3843	0	0	0	0	0	0	0	0	0	5	0	0	0	1	0	6
d__Bacteria	k__norank_d__Bacteria	p__unclassified_k__norank_d__Bacteria	c__unclassified_k__norank_d__Bacteria	o__unclassified_k__norank_d__Bacteria	f__unclassified_k__norank_d__Bacteria	g__unclassified_k__norank_d__Bacteria	s__unclassified_k__norank_d__Bacteria	OTU6265	1	1	0	2	6	3	6	2	11	0	0	0	3	0	0	35
d__Bacteria	k__norank_d__Bacteria	p__Proteobacteria	c__Gammaproteobacteria	o__Diplorickettsiales	f__Diplorickettsiaceae	g__Aquicella	s__unclassified_g__Aquicella	OTU2085	0	0	0	0	1	0	1	0	0	0	0	0	0	0	0	2
d__Bacteria	k__norank_d__Bacteria	p__Chloroflexi	c__Anaerolineae	o__SBR1031	f__norank_o__SBR1031	g__norank_f__norank_o__SBR1031	s__uncultured_Gemmatimonadetes_bacterium_g__norank_f__norank	OTU3541	0	0	0	0	0	0	0	0	0	0	1	0	0	0	0	1
d__Bacteria	k__norank_d__Bacteria	p__Proteobacteria	c__Gammaproteobacteria	o__Gammaproteobacteria_Incertae_Sedis	f__unclassified_o__Gammaproteobacteria_Incertae_Sedis	g__Acidibacter	s__uncultured_gamma_proteobacterium_g__Acidibacter	OTU2785	11	24	12	18	32	17	15	11	26	8	25	14	19	34	12	278
d__Bacteria	k__norank_d__Bacteria	p__Armatimonadota	c__Chthonomonadetes	o__Chthonomonadales	f__Chthonomonadaceae	g__Chthonomonas	s__uncultured_bacterium_g__Chthonomonas	OTU4062	1	0	2	0	0	0	0	0	0	0	1	0	0	0	0	4
d__Bacteria	k__norank_d__Bacteria	p__Firmicutes	c__Bacilli	o__Entomoplasmatales	f__type_III	g__norank_f__type_III	s__uncultured_Mollicutes_bacterium_g__norank	OTU6219	9	0	0	0	0	5	0	1	0	1	0	0	0	0	1	17
d__Bacteria	k__norank_d__Bacteria	p__Actinobacteriota	c__Acidimicrobiia	o__Microtrichales	f__Ilumatobacteraceae	g__CL500-29_marine_group	s__metagenome_g__CL500-29_marine_group	OTU3131	5	1	4	0	0	0	0	1	0	11	3	3	0	1	5	34
d__Bacteria	k__norank_d__Bacteria	p__Proteobacteria	c__Alphaproteobacteria	o__Caulobacterales	f__Hyphomonadaceae	g__norank_f__Hyphomonadaceae	s__uncultured_bacterium_g__norank_f__Hyphomonadaceae	OTU6016	0	0	0	0	1	0	0	0	0	1	0	1	0	0	2	5
d__Bacteria	k__norank_d__Bacteria	p__Verrucomicrobiota	c__Chlamydiae	o__Chlamydiales	f__Simkaniaceae	g__norank_f__Simkaniaceae	s__unclassified_g__norank_f__Simkaniaceae	OTU1789	0	0	2	0	0	0	19	2	0	0	0	0	0	0	0	23
d__Bacteria	k__norank_d__Bacteria	p__Actinobacteriota	c__MB-A2-108	o__norank_c__MB-A2-108	f__norank_o__norank_c__MB-A2-108	g__norank_f__norank_o__norank_c__MB-A2-108	s__unclassified_g__norank_f__norank_o__norank_c__MB-A2-108	OTU2934	10	0	0	0	0	0	0	0	0	6	1	0	2	8	1	28
d__Bacteria	k__norank_d__Bacteria	p__Acidobacteriota	c__Acidobacteriae	o__Acidobacteriales	f__norank_o__Acidobacteriales	g__norank_f__norank_o__Acidobacteriales	s__unclassified_g__norank_f__norank_o__Acidobacteriales	OTU5843	14	67	17	30	323	47	46	46	56	2	33	32	11	25	16	765
d__Bacteria	k__norank_d__Bacteria	p__Actinobacteriota	c__Actinobacteria	o__Corynebacteriales	f__Nocardiaceae	g__Williamsia	s__unclassified_g__Williamsia	OTU3116	3	0	0	0	0	0	1	3	0	1	0	0	0	0	0	8
d__Bacteria	k__norank_d__Bacteria	p__Actinobacteriota	c__Actinobacteria	o__PeM15	f__norank_o__PeM15	g__norank_f__norank_o__PeM15	s__uncultured_bacterium_g__norank_f__norank_o__PeM15	OTU4005	0	0	0	0	0	0	0	0	0	6	4	0	0	0	0	10
d__Bacteria	k__norank_d__Bacteria	p__Bdellovibrionota	c__Oligoflexia	o__0319-6G20	f__norank_o__0319-6G20	g__norank_f__norank_o__0319-6G20	s__unclassified_g__norank_f__norank_o__0319-6G20	OTU5388	0	1	0	0	2	0	0	0	0	1	0	0	0	1	0	5
d__Bacteria	k__norank_d__Bacteria	p__Chloroflexi	c__Ktedonobacteria	o__Ktedonobacterales	f__Ktedonobacteraceae	g__norank_f__Ktedonobacteraceae	s__bacterium_SOSP1-63	OTU828	0	0	0	0	0	0	1	0	0	0	0	0	0	0	0	1
d__Bacteria	k__norank_d__Bacteria	p__Proteobacteria	c__Alphaproteobacteria	o__Sphingomonadales	f__Sphingomonadaceae	g__Novosphingobium	s__unclassified_g__Novosphingobium	OTU6059	9	19	5	7	13	8	12	11	19	26	13	11	2	20	63	238
d__Bacteria	k__norank_d__Bacteria	p__Verrucomicrobiota	c__Verrucomicrobiae	o__Chthoniobacterales	f__Chthoniobacteraceae	g__Candidatus_Udaeobacter	s__uncultured_Verrucomicrobia_bacterium_g__Candidatus_Udaeobacter	OTU3112	1	0	0	0	3	0	0	1	0	2	0	2	0	0	0	9
d__Bacteria	k__norank_d__Bacteria	p__Proteobacteria	c__Gammaproteobacteria	o__Xanthomonadales	f__Rhodanobacteraceae	g__Dyella	s__unclassified_g__Dyella	OTU5772	162	617	228	711	190	1419	366	161	155	17	29	33	426	61	16	4591
d__Bacteria	k__norank_d__Bacteria	p__Chloroflexi	c__Ktedonobacteria	o__Ktedonobacterales	f__JG30-KF-AS9	g__norank_f__JG30-KF-AS9	s__uncultured_bacterium_g__norank_f__JG30-KF-AS9	OTU920	6	4	0	8	1	6	4	9	7	3	5	2	2	19	0	76
d__Bacteria	k__norank_d__Bacteria	p__Bacteroidota	c__Kapabacteria	o__Kapabacteriales	f__norank_o__Kapabacteriales	g__norank_f__norank_o__Kapabacteriales	s__uncultured_bacterium_g__norank_f__norank_o__Kapabacteriales	OTU401	0	0	2	0	0	0	0	0	0	0	0	0	0	0	0	2
d__Bacteria	k__norank_d__Bacteria	p__Patescibacteria	c__Saccharimonadia	o__Saccharimonadales	f__norank_o__Saccharimonadales	g__norank_f__norank_o__Saccharimonadales	s__unclassified_g__norank_f__norank_o__Saccharimonadales	OTU2881	0	0	0	0	0	0	0	0	0	5	0	0	0	0	0	5
d__Bacteria	k__norank_d__Bacteria	p__Actinobacteriota	c__Actinobacteria	o__Frankiales	f__norank_o__Frankiales	g__norank_f__norank_o__Frankiales	s__unclassified_g__norank_f__norank_o__Frankiales	OTU3827	23	27	19	5	17	15	30	30	12	46	33	63	40	22	9	391
d__Bacteria	k__norank_d__Bacteria	p__Chloroflexi	c__Chloroflexia	o__Thermomicrobiales	f__JG30-KF-CM45	g__norank_f__JG30-KF-CM45	s__metagenome_g__norank_f__JG30-KF-CM45	OTU5659	1	0	2	0	0	0	0	0	0	0	0	0	0	0	2	5
d__Bacteria	k__norank_d__Bacteria	p__Planctomycetota	c__Planctomycetes	o__Isosphaerales	f__Isosphaeraceae	g__norank_f__Isosphaeraceae	s__unclassified_g__norank_f__Isosphaeraceae	OTU5827	0	0	0	1	0	0	0	0	1	0	0	0	0	0	0	2
d__Bacteria	k__norank_d__Bacteria	p__Acidobacteriota	c__Acidobacteriae	o__Solibacterales	f__Solibacteraceae	g__Candidatus_Solibacter	s__unclassified_g__Candidatus_Solibacter	OTU5307	1	11	16	15	59	57	19	22	27	1	7	4	9	13	0	261
d__Bacteria	k__norank_d__Bacteria	p__Acidobacteriota	c__Blastocatellia	o__Blastocatellales	f__Blastocatellaceae	g__norank_f__Blastocatellaceae	s__uncultured_Acidobacteria_bacterium_g__norank_f__Blastocatellaceae	OTU5714	4	1	46	0	1	0	1	0	0	35	7	0	0	2	28	125
d__Bacteria	k__norank_d__Bacteria	p__Bacteroidota	c__Bacteroidia	o__Bacteroidales	f__Prevotellaceae	g__Prevotella	s__Prevotella_colorans	OTU5118	0	0	10	3	2	0	0	0	0	0	1	0	3	0	0	19
d__Bacteria	k__norank_d__Bacteria	p__Verrucomicrobiota	c__Verrucomicrobiae	o__Chthoniobacterales	f__Chthoniobacteraceae	g__Chthoniobacter	s__unclassified_g__Chthoniobacter	OTU3428	0	0	0	0	0	0	0	0	0	0	7	0	0	0	0	7
d__Bacteria	k__norank_d__Bacteria	p__Proteobacteria	c__Gammaproteobacteria	o__Burkholderiales	f__Nitrosomonadaceae	g__MND1	s__unclassified_g__MND1	OTU2318	33	25	22	0	11	8	6	1	10	118	64	12	6	78	15	409
d__Bacteria	k__norank_d__Bacteria	p__Proteobacteria	c__Gammaproteobacteria	o__Burkholderiales	f__SC-I-84	g__norank_f__SC-I-84	s__uncultured_bacterium_g__norank_f__SC-I-84	OTU5266	0	0	0	0	0	0	0	0	0	0	0	0	0	1	1	2
d__Bacteria	k__norank_d__Bacteria	p__Desulfobacterota	c__Desulfuromonadia	o__Geobacterales	f__Geobacteraceae	g__Citrifermentans	s__unclassified_g__Citrifermentans	OTU465	0	0	3	0	0	0	0	0	0	0	0	0	0	0	0	3
d__Bacteria	k__norank_d__Bacteria	p__Chloroflexi	c__JG30-KF-CM66	o__norank_c__JG30-KF-CM66	f__norank_o__norank_c__JG30-KF-CM66	g__norank_f__norank_o__norank_c__JG30-KF-CM66	s__unclassified_g__norank_f__norank_o__norank_c__JG30-KF-CM66	OTU2821	0	0	0	0	0	0	0	0	1	0	0	0	0	1	1	3
d__Bacteria	k__norank_d__Bacteria	p__Acidobacteriota	c__Acidobacteriae	o__Subgroup_15	f__norank_o__Subgroup_15	g__norank_f__norank_o__Subgroup_15	s__uncultured_bacterium_g__norank_f__norank_o__Subgroup_15	OTU2782	3	0	1	2	1	2	3	0	7	0	0	0	0	0	0	19
d__Bacteria	k__norank_d__Bacteria	p__Bacteroidota	c__Bacteroidia	o__Chitinophagales	f__Chitinophagaceae	g__Edaphobaculum	s__unclassified_g__Edaphobaculum	OTU3687	0	0	0	0	6	1	3	1	0	0	0	1	0	0	0	12
d__Bacteria	k__norank_d__Bacteria	p__Proteobacteria	c__Gammaproteobacteria	o__Xanthomonadales	f__Rhodanobacteraceae	g__Rhodanobacter	s__uncultured_Rhodanobacter_sp._g__Rhodanobacter	OTU4487	0	1	0	0	0	0	2	0	4	181	4	119	0	10	29	350
d__Bacteria	k__norank_d__Bacteria	p__Verrucomicrobiota	c__Chlamydiae	o__Chlamydiales	f__cvE6	g__norank_f__cvE6	s__unclassified_g__norank_f__cvE6	OTU2292	0	0	1	0	0	0	4	2	0	0	0	0	0	0	0	7
d__Bacteria	k__norank_d__Bacteria	p__Proteobacteria	c__Gammaproteobacteria	o__Diplorickettsiales	f__Diplorickettsiaceae	g__norank_f__Diplorickettsiaceae	s__uncultured_Coxiellaceae_bacterium_g__norank_f__Diplorickettsiaceae	OTU1437	0	0	0	0	0	2	0	0	0	0	0	0	0	0	0	2
d__Bacteria	k__norank_d__Bacteria	p__Verrucomicrobiota	c__Chlamydiae	o__Chlamydiales	f__Parachlamydiaceae	g__Candidatus_Protochlamydia	s__Candidatus_Protochlamydia_naegleriophila	OTU664	0	0	7	0	0	0	0	0	0	0	0	0	0	0	0	7
d__Bacteria	k__norank_d__Bacteria	p__Bdellovibrionota	c__Oligoflexia	o__Oligoflexales	f__norank_o__Oligoflexales	g__norank_f__norank_o__Oligoflexales	s__unclassified_g__norank_f__norank_o__Oligoflexales	OTU802	0	0	0	1	0	0	0	0	0	0	0	0	0	0	0	1
d__Bacteria	k__norank_d__Bacteria	p__Actinobacteriota	c__Actinobacteria	o__Propionibacteriales	f__Propionibacteriaceae	g__Microlunatus	s__unclassified_g__Microlunatus	OTU2039	0	0	0	0	0	1	10	3	3	1	0	1	0	0	0	19
d__Bacteria	k__norank_d__Bacteria	p__Dependentiae	c__Babeliae	o__Babeliales	f__UBA12409	g__norank_f__UBA12409	s__unclassified_g__norank_f__UBA12409	OTU3406	0	0	0	0	0	0	0	0	0	0	4	0	0	0	0	4
d__Bacteria	k__norank_d__Bacteria	p__Myxococcota	c__bacteriap25	o__norank_c__bacteriap25	f__norank_o__norank_c__bacteriap25	g__norank_f__norank_o__norank_c__bacteriap25	s__unclassified_g__norank_f__norank_o__norank_c__bacteriap25	OTU5561	2	0	13	0	1	1	2	0	0	37	33	0	0	3	7	99
d__Bacteria	k__norank_d__Bacteria	p__Myxococcota	c__Myxococcia	o__Myxococcales	f__27F-1492R	g__norank_f__27F-1492R	s__uncultured_bacterium_g__norank_f__27F-1492R	OTU3768	0	0	0	0	0	2	0	0	0	0	4	0	0	0	0	6
d__Bacteria	k__norank_d__Bacteria	p__Verrucomicrobiota	c__Verrucomicrobiae	o__Chthoniobacterales	f__Chthoniobacteraceae	g__LD29	s__uncultured_Xiphinematobacteriaceae_bacterium_g__LD29	OTU770	0	0	0	0	0	0	0	0	0	0	0	2	0	1	0	3
d__Bacteria	k__norank_d__Bacteria	p__Patescibacteria	c__Saccharimonadia	o__Saccharimonadales	f__LWQ8	g__norank_f__LWQ8	s__uncultured_bacterium_g__norank_f__LWQ8	OTU5768	4	19	176	146	13	113	31	21	108	1	4	12	59	0	10	717
d__Bacteria	k__norank_d__Bacteria	p__Acidobacteriota	c__Acidobacteriae	o__Subgroup_15	f__norank_o__Subgroup_15	g__norank_f__norank_o__Subgroup_15	s__unclassified_g__norank_f__norank_o__Subgroup_15	OTU3991	0	0	0	0	0	0	0	0	0	0	4	0	0	0	0	4
d__Bacteria	k__norank_d__Bacteria	p__Verrucomicrobiota	c__Chlamydiae	o__Chlamydiales	f__Parachlamydiaceae	g__unclassified_f__Parachlamydiaceae	s__unclassified_f__Parachlamydiaceae	OTU1942	0	0	0	0	0	0	2	0	0	0	0	0	0	0	0	2
d__Bacteria	k__norank_d__Bacteria	p__Proteobacteria	c__Alphaproteobacteria	o__Defluviicoccales	f__norank_o__Defluviicoccales	g__norank_f__norank_o__Defluviicoccales	s__metagenome_g__norank_f__norank_o__Defluviicoccales	OTU2557	1	0	2	0	0	0	0	2	0	2	0	0	0	0	0	7
d__Bacteria	k__norank_d__Bacteria	p__Actinobacteriota	c__Actinobacteria	o__Actinomycetales	f__Actinomycetaceae	g__Actinomyces	s__Schaalia_radingae	OTU3318	0	0	2	0	0	0	0	0	0	0	2	0	0	0	0	4
d__Bacteria	k__norank_d__Bacteria	p__Bacteroidota	c__Bacteroidia	o__Chitinophagales	f__Chitinophagaceae	g__Edaphobaculum	s__unclassified_g__Edaphobaculum	OTU1807	0	0	0	1	0	0	0	0	0	0	0	0	0	0	0	1
d__Bacteria	k__norank_d__Bacteria	p__Armatimonadota	c__Fimbriimonadia	o__Fimbriimonadales	f__Fimbriimonadaceae	g__norank_f__Fimbriimonadaceae	s__uncultured_bacterium_g__norank_f__Fimbriimonadaceae	OTU2921	0	0	0	0	0	0	0	0	0	1	0	0	0	0	0	1
d__Bacteria	k__norank_d__Bacteria	p__Proteobacteria	c__Gammaproteobacteria	o__KF-JG30-C25	f__norank_o__KF-JG30-C25	g__norank_f__norank_o__KF-JG30-C25	s__unclassified_g__norank_f__norank_o__KF-JG30-C25	OTU3770	0	2	0	0	0	0	0	0	0	1	0	0	58	0	0	61
d__Bacteria	k__norank_d__Bacteria	p__FCPU426	c__norank_p__FCPU426	o__norank_c__norank_p__FCPU426	f__norank_o__norank_c__norank_p__FCPU426	g__norank_f__norank_o__norank_c__norank_p__FCPU426	s__uncultured_bacterium_g__norank_f__norank_o__norank_c__norank_p__FCPU426	OTU3831	0	0	0	0	1	0	0	3	0	1	0	3	1	3	0	12
d__Bacteria	k__norank_d__Bacteria	p__Proteobacteria	c__Alphaproteobacteria	o__Elsterales	f__URHD0088	g__norank_f__URHD0088	s__unclassified_g__norank_f__URHD0088	OTU5291	11	34	3	19	15	38	12	24	21	17	6	18	11	24	1	254
d__Bacteria	k__norank_d__Bacteria	p__Acidobacteriota	c__Holophagae	o__Subgroup_7	f__norank_o__Subgroup_7	g__norank_f__norank_o__Subgroup_7	s__uncultured_bacterium_g__norank_f__norank_o__Subgroup_7	OTU5290	4	1	29	0	1	0	2	0	0	18	0	0	0	3	2	60
d__Bacteria	k__norank_d__Bacteria	p__Acidobacteriota	c__Acidobacteriae	o__Bryobacterales	f__Bryobacteraceae	g__Bryobacter	s__uncultured_soil_bacterium_g__Bryobacter	OTU1915	9	4	9	3	11	12	12	57	11	1	0	2	26	1	1	159
d__Bacteria	k__norank_d__Bacteria	p__Acidobacteriota	c__Acidobacteriae	o__Subgroup_13	f__norank_o__Subgroup_13	g__norank_f__norank_o__Subgroup_13	s__uncultured_bacterium_g__norank_f__norank_o__Subgroup_13	OTU2703	0	1	0	0	5	6	20	6	23	0	1	1	7	0	0	70
d__Bacteria	k__norank_d__Bacteria	p__unclassified_k__norank_d__Bacteria	c__unclassified_k__norank_d__Bacteria	o__unclassified_k__norank_d__Bacteria	f__unclassified_k__norank_d__Bacteria	g__unclassified_k__norank_d__Bacteria	s__unclassified_k__norank_d__Bacteria	OTU2507	0	0	0	0	0	1	0	2	0	0	0	0	0	0	0	3
d__Bacteria	k__norank_d__Bacteria	p__Proteobacteria	c__Gammaproteobacteria	o__unclassified_c__Gammaproteobacteria	f__unclassified_c__Gammaproteobacteria	g__unclassified_c__Gammaproteobacteria	s__unclassified_c__Gammaproteobacteria	OTU6435	0	0	0	0	1	0	1	0	0	0	0	0	0	0	0	2
d__Bacteria	k__norank_d__Bacteria	p__Proteobacteria	c__Alphaproteobacteria	o__Tistrellales	f__Geminicoccaceae	g__Candidatus_Alysiosphaera	s__uncultured_bacterium_g__Candidatus_Alysiosphaera	OTU5758	1	1	0	0	0	0	0	0	0	0	0	0	0	1	0	3
d__Bacteria	k__norank_d__Bacteria	p__Bacteroidota	c__Kryptonia	o__Kryptoniales	f__BSV26	g__norank_f__BSV26	s__uncultured_bacterium_g__norank_f__BSV26	OTU4346	0	0	0	0	0	0	0	0	0	0	0	0	0	1	0	1
d__Bacteria	k__norank_d__Bacteria	p__Proteobacteria	c__Gammaproteobacteria	o__Pseudomonadales	f__Moraxellaceae	g__Acinetobacter	s__Acinetobacter_lwoffii	OTU6215	0	0	1	4	9	0	2	0	2	0	2	0	0	0	0	20
d__Bacteria	k__norank_d__Bacteria	p__Proteobacteria	c__Gammaproteobacteria	o__Burkholderiales	f__Burkholderiaceae	g__Burkholderia-Caballeronia-Paraburkholderia	s__unclassified_g__Burkholderia-Caballeronia-Paraburkholderia	OTU1452	2363	749	617	561	684	2625	25	77	55	95	58	98	118	857	615	9597
d__Bacteria	k__norank_d__Bacteria	p__Acidobacteriota	c__Subgroup_22	o__norank_c__Subgroup_22	f__norank_o__norank_c__Subgroup_22	g__norank_f__norank_o__norank_c__Subgroup_22	s__uncultured_Holophaga_sp._g__norank_f__norank_o__norank	OTU5415	0	0	0	0	0	0	0	0	1	0	0	0	0	1	0	2
d__Bacteria	k__norank_d__Bacteria	p__Chloroflexi	c__Anaerolineae	o__SBR1031	f__norank_o__SBR1031	g__norank_f__norank_o__SBR1031	s__uncultured_Gemmatimonadetes_bacterium_g__norank_f__norank	OTU3960	0	0	8	0	0	0	0	0	0	0	0	0	0	1	1	10
d__Bacteria	k__norank_d__Bacteria	p__Acidobacteriota	c__Acidobacteriae	o__Solibacterales	f__Solibacteraceae	g__Candidatus_Solibacter	s__metagenome_g__Candidatus_Solibacter	OTU1333	23	28	38	28	66	45	88	53	36	42	40	66	52	26	17	648
d__Bacteria	k__norank_d__Bacteria	p__Chloroflexi	c__Anaerolineae	o__Caldilineales	f__Caldilineaceae	g__norank_f__Caldilineaceae	s__unclassified_g__norank_f__Caldilineaceae	OTU1053	0	0	0	5	0	0	0	0	0	0	0	0	0	0	0	5
d__Bacteria	k__norank_d__Bacteria	p__Proteobacteria	c__Gammaproteobacteria	o__Diplorickettsiales	f__Diplorickettsiaceae	g__norank_f__Diplorickettsiaceae	s__unclassified_g__norank_f__Diplorickettsiaceae	OTU2049	0	0	0	0	0	1	8	3	0	0	0	0	0	0	0	12
d__Bacteria	k__norank_d__Bacteria	p__Proteobacteria	c__Gammaproteobacteria	o__Diplorickettsiales	f__Diplorickettsiaceae	g__norank_f__Diplorickettsiaceae	s__unclassified_g__norank_f__Diplorickettsiaceae	OTU2043	0	0	0	0	0	0	2	0	0	0	0	0	0	0	0	2
d__Bacteria	k__norank_d__Bacteria	p__Chloroflexi	c__Chloroflexia	o__Thermomicrobiales	f__AKYG1722	g__norank_f__AKYG1722	s__uncultured_bacterium_g__norank_f__AKYG1722	OTU6119	0	0	0	0	0	0	0	0	0	6	0	0	0	0	7	13
d__Bacteria	k__norank_d__Bacteria	p__Planctomycetota	c__Planctomycetes	o__Gemmatales	f__Gemmataceae	g__norank_f__Gemmataceae	s__unclassified_g__norank_f__Gemmataceae	OTU394	1	0	2	1	0	0	0	3	1	0	0	0	0	0	0	8
d__Bacteria	k__norank_d__Bacteria	p__Actinobacteriota	c__Thermoleophilia	o__Solirubrobacterales	f__Solirubrobacteraceae	g__Conexibacter	s__unclassified_g__Conexibacter	OTU2296	0	0	1	2	13	51	68	10	2	0	0	1	11	0	0	159
d__Bacteria	k__norank_d__Bacteria	p__Firmicutes	c__Clostridia	o__Clostridiales	f__Caloramatoraceae	g__Fonticella	s__uncultured_bacterium_g__Fonticella	OTU310	0	2	3	0	0	0	0	0	0	0	0	0	0	0	0	5
d__Bacteria	k__norank_d__Bacteria	p__Patescibacteria	c__Saccharimonadia	o__Saccharimonadales	f__norank_o__Saccharimonadales	g__norank_f__norank_o__Saccharimonadales	s__unclassified_g__norank_f__norank_o__Saccharimonadales	OTU5501	0	0	0	0	0	0	0	0	0	0	0	0	0	0	3	3
d__Bacteria	k__norank_d__Bacteria	p__Proteobacteria	c__Gammaproteobacteria	o__Diplorickettsiales	f__Diplorickettsiaceae	g__Aquicella	s__unclassified_g__Aquicella	OTU593	0	0	2	0	0	0	0	0	0	0	0	0	0	0	0	2
d__Bacteria	k__norank_d__Bacteria	p__Bdellovibrionota	c__Bdellovibrionia	o__Bdellovibrionales	f__Bdellovibrionaceae	g__Bdellovibrio	s__uncultured_bacterium_g__Bdellovibrio	OTU5802	0	0	5	1	0	0	0	0	4	1	0	0	0	0	0	11
d__Bacteria	k__norank_d__Bacteria	p__Proteobacteria	c__Gammaproteobacteria	o__Diplorickettsiales	f__Diplorickettsiaceae	g__norank_f__Diplorickettsiaceae	s__unclassified_g__norank_f__Diplorickettsiaceae	OTU2101	0	0	0	0	0	0	5	0	0	0	0	1	0	0	0	6
d__Bacteria	k__norank_d__Bacteria	p__Verrucomicrobiota	c__Chlamydiae	o__Chlamydiales	f__Parachlamydiaceae	g__Neochlamydia	s__uncultured_Chlamydiales_bacterium_g__Neochlamydia	OTU1438	1	0	0	0	0	1	0	0	0	0	0	0	0	0	0	2
d__Bacteria	k__norank_d__Bacteria	p__Acidobacteriota	c__Acidobacteriae	o__norank_c__Acidobacteriae	f__norank_o__norank_c__Acidobacteriae	g__Paludibaculum	s__uncultured_soil_bacterium_g__Paludibaculum	OTU389	0	0	1	0	0	0	0	0	0	2	0	0	0	0	1	4
d__Bacteria	k__norank_d__Bacteria	p__Proteobacteria	c__Alphaproteobacteria	o__Acetobacterales	f__Acetobacteraceae	g__unclassified_f__Acetobacteraceae	s__unclassified_f__Acetobacteraceae	OTU4973	4	13	3	0	11	8	16	5	5	1	9	2	10	5	0	92
d__Bacteria	k__norank_d__Bacteria	p__Acidobacteriota	c__Blastocatellia	o__Blastocatellales	f__Blastocatellaceae	g__unclassified_f__Blastocatellaceae	s__unclassified_f__Blastocatellaceae	OTU5715	0	0	1	0	1	0	0	0	0	22	3	0	0	0	9	36
d__Bacteria	k__norank_d__Bacteria	p__Acidobacteriota	c__Blastocatellia	o__11-24	f__norank_o__11-24	g__norank_f__norank_o__11-24	s__uncultured_Acidobacteriales_bacterium_g__norank	OTU2936	0	0	35	0	0	0	0	0	0	2	0	0	0	1	2	40
d__Bacteria	k__norank_d__Bacteria	p__Proteobacteria	c__Alphaproteobacteria	o__Paracaedibacterales	f__Paracaedibacteraceae	g__Candidatus_Paracaedibacter	s__metagenome_g__Candidatus_Paracaedibacter	OTU1975	1	0	0	2	5	3	2	2	0	1	0	1	0	0	0	17
d__Bacteria	k__norank_d__Bacteria	p__Chloroflexi	c__Ktedonobacteria	o__Ktedonobacterales	f__Ktedonobacteraceae	g__1959-1	s__uncultured_bacterium_g__1959-1	OTU6559	6	10	2	42	2	12	19	7	27	0	0	4	16	3	0	150
d__Bacteria	k__norank_d__Bacteria	p__Proteobacteria	c__Gammaproteobacteria	o__Pseudomonadales	f__Moraxellaceae	g__norank_f__Moraxellaceae	s__metagenome_g__norank_f__Moraxellaceae	OTU5729	4	0	2	0	2	0	0	0	0	1	0	0	0	0	1	10
d__Bacteria	k__norank_d__Bacteria	p__Patescibacteria	c__Saccharimonadia	o__Saccharimonadales	f__WWH38	g__norank_f__WWH38	s__uncultured_bacterium_g__norank_f__WWH38	OTU1099	0	4	0	4	25	0	1	1	1	0	0	2	0	2	2	42
d__Bacteria	k__norank_d__Bacteria	p__Bacteroidota	c__Bacteroidia	o__Sphingobacteriales	f__unclassified_o__Sphingobacteriales	g__unclassified_o__Sphingobacteriales	s__unclassified_o__Sphingobacteriales	OTU5305	0	0	0	0	0	0	0	0	0	0	0	0	0	1	0	1
d__Bacteria	k__norank_d__Bacteria	p__Bacteroidota	c__Bacteroidia	o__Chitinophagales	f__Chitinophagaceae	g__Terrimonas	s__uncultured_bacterium_g__Terrimonas	OTU179	3	1	2	0	0	0	0	0	0	0	0	0	0	0	3	9
d__Bacteria	k__norank_d__Bacteria	p__Proteobacteria	c__Gammaproteobacteria	o__Burkholderiales	f__A21b	g__norank_f__A21b	s__uncultured_bacterium_g__norank_f__A21b	OTU2798	0	0	2	0	0	0	0	0	3	1	0	0	0	0	1	7
d__Bacteria	k__norank_d__Bacteria	p__Firmicutes	c__Bacilli	o__unclassified_c__Bacilli	f__unclassified_c__Bacilli	g__unclassified_c__Bacilli	s__unclassified_c__Bacilli	OTU5281	0	0	0	0	0	0	0	0	0	0	0	0	0	5	0	5
d__Bacteria	k__norank_d__Bacteria	p__Chloroflexi	c__Anaerolineae	o__SBR1031	f__norank_o__SBR1031	g__norank_f__norank_o__SBR1031	s__uncultured_Gemmatimonadetes_bacterium_g__norank_f__norank	OTU1203	0	0	0	0	5	0	0	0	0	0	0	0	0	0	0	5
d__Bacteria	k__norank_d__Bacteria	p__Planctomycetota	c__Phycisphaerae	o__Tepidisphaerales	f__WD2101_soil_group	g__norank_f__WD2101_soil_group	s__uncultured_planctomycete_g__norank_f__WD2101_soil_group	OTU808	0	0	0	0	0	0	0	2	1	0	0	1	0	0	0	4
d__Bacteria	k__norank_d__Bacteria	p__Acidobacteriota	c__Vicinamibacteria	o__Vicinamibacterales	f__norank_o__Vicinamibacterales	g__norank_f__norank_o__Vicinamibacterales	s__uncultured_Acidobacteria_bacterium_g__norank_f__norank_o__Vicinamibacterales	OTU3419	10	2	17	0	1	0	5	0	0	59	275	5	0	0	57	431
d__Bacteria	k__norank_d__Bacteria	p__Chloroflexi	c__Dehalococcoidia	o__S085	f__norank_o__S085	g__norank_f__norank_o__S085	s__metagenome_g__norank_f__norank_o__S085	OTU6028	7	5	19	1	6	1	6	1	3	15	13	10	4	4	19	114
d__Bacteria	k__norank_d__Bacteria	p__Proteobacteria	c__Alphaproteobacteria	o__Acetobacterales	f__Acetobacteraceae	g__Craurococcus-Caldovatus	s__uncultured_bacterium_g__Craurococcus-Caldovatus	OTU3301	0	0	0	0	0	0	0	0	0	0	4	0	0	0	0	4
d__Bacteria	k__norank_d__Bacteria	p__Actinobacteriota	c__Thermoleophilia	o__Gaiellales	f__norank_o__Gaiellales	g__norank_f__norank_o__Gaiellales	s__bacterium_Ellin6515	OTU3414	3	21	10	4	23	13	13	14	23	1	7	4	3	8	0	147
d__Bacteria	k__norank_d__Bacteria	p__Verrucomicrobiota	c__Verrucomicrobiae	o__Chthoniobacterales	f__Chthoniobacteraceae	g__Chthoniobacter	s__metagenome_g__Chthoniobacter	OTU3423	0	0	1	0	0	0	0	0	0	0	4	0	0	0	0	5
d__Bacteria	k__norank_d__Bacteria	p__Patescibacteria	c__Saccharimonadia	o__Saccharimonadales	f__LWQ8	g__norank_f__LWQ8	s__uncultured_bacterium_g__norank_f__LWQ8	OTU4003	1	0	0	0	0	0	0	0	0	3	0	0	0	0	0	4
d__Bacteria	k__norank_d__Bacteria	p__Proteobacteria	c__Gammaproteobacteria	o__Diplorickettsiales	f__Diplorickettsiaceae	g__norank_f__Diplorickettsiaceae	s__uncultured_bacterium_g__norank_f__Diplorickettsiaceae	OTU4977	1	3	0	0	0	0	2	0	1	0	0	0	5	1	0	13
d__Bacteria	k__norank_d__Bacteria	p__Elusimicrobiota	c__Lineage_IIa	o__norank_c__Lineage_IIa	f__norank_o__norank_c__Lineage_IIa	g__norank_f__norank_o__norank_c__Lineage_IIa	s__unclassified_g__norank_f__norank_o__norank_c__Lineage_IIa	OTU6401	3	0	1	0	0	0	0	0	0	1	0	0	0	0	0	5
d__Bacteria	k__norank_d__Bacteria	p__Acidobacteriota	c__Acidobacteriae	o__Solibacterales	f__Solibacteraceae	g__Candidatus_Solibacter	s__metagenome_g__Candidatus_Solibacter	OTU6576	6	12	14	28	55	36	49	46	123	41	16	68	31	18	8	551
d__Bacteria	k__norank_d__Bacteria	p__Myxococcota	c__Polyangia	o__Polyangiales	f__BIrii41	g__norank_f__BIrii41	s__unclassified_g__norank_f__BIrii41	OTU5530	2	6	13	0	2	0	0	5	1	10	0	1	0	7	7	54
d__Bacteria	k__norank_d__Bacteria	p__Acidobacteriota	c__Acidobacteriae	o__Subgroup_2	f__norank_o__Subgroup_2	g__norank_f__norank_o__Subgroup_2	s__uncultured_forest_soil_bacterium_g__norank_f__norank_o__Subgroup_2	OTU1734	3	18	19	27	90	32	122	33	56	1	15	16	50	7	6	495
d__Bacteria	k__norank_d__Bacteria	p__Planctomycetota	c__OM190	o__norank_c__OM190	f__norank_o__norank_c__OM190	g__norank_f__norank_o__norank_c__OM190	s__uncultured_Planctomyces_sp._g__norank	OTU5639	0	0	0	0	0	0	0	0	0	0	0	0	0	0	3	3
d__Bacteria	k__norank_d__Bacteria	p__Proteobacteria	c__Gammaproteobacteria	o__Pseudomonadales	f__Moraxellaceae	g__Acinetobacter	s__Acinetobacter_schindleri	OTU5943	2	0	5	0	2	1	1	1	3	0	4	0	5	0	0	24
d__Bacteria	k__norank_d__Bacteria	p__Patescibacteria	c__Saccharimonadia	o__Saccharimonadales	f__norank_o__Saccharimonadales	g__norank_f__norank_o__Saccharimonadales	s__uncultured_bacterium_g__norank_f__norank_o__Saccharimonadales	OTU5879	0	1	0	0	0	0	0	0	1	0	0	0	1	33	1	37
d__Bacteria	k__norank_d__Bacteria	p__Firmicutes	c__Bacilli	o__Entomoplasmatales	f__type_III	g__norank_f__type_III	s__uncultured_Mollicutes_bacterium_g__norank	OTU1745	0	0	0	0	0	0	0	0	0	0	0	0	0	1	0	1
d__Bacteria	k__norank_d__Bacteria	p__Actinobacteriota	c__Acidimicrobiia	o__IMCC26256	f__norank_o__IMCC26256	g__norank_f__norank_o__IMCC26256	s__unclassified_g__norank_f__norank_o__IMCC26256	OTU4334	5	1	1	0	3	5	0	0	0	0	0	1	0	3	0	19
d__Bacteria	k__norank_d__Bacteria	p__Bacteroidota	c__Bacteroidia	o__Chitinophagales	f__Chitinophagaceae	g__unclassified_f__Chitinophagaceae	s__unclassified_f__Chitinophagaceae	OTU963	0	0	1	1	0	0	0	0	0	0	0	0	0	0	0	2
d__Bacteria	k__norank_d__Bacteria	p__Bacteroidota	c__Bacteroidia	o__Chitinophagales	f__Chitinophagaceae	g__Edaphobaculum	s__unclassified_g__Edaphobaculum	OTU6580	0	0	2	0	0	0	0	0	0	2	0	0	0	0	2	6
d__Bacteria	k__norank_d__Bacteria	p__Myxococcota	c__Polyangia	o__mle1-27	f__norank_o__mle1-27	g__norank_f__norank_o__mle1-27	s__uncultured_delta_proteobacterium_g__norank_f__norank_o__mle1-27	OTU1281	0	0	0	0	4	3	2	4	0	0	0	0	1	2	0	16
d__Bacteria	k__norank_d__Bacteria	p__Actinobacteriota	c__Thermoleophilia	o__Solirubrobacterales	f__Solirubrobacteraceae	g__Conexibacter	s__unclassified_g__Conexibacter	OTU5711	102	157	133	265	368	292	446	316	237	13	26	32	291	50	29	2757
d__Bacteria	k__norank_d__Bacteria	p__Proteobacteria	c__Gammaproteobacteria	o__Burkholderiales	f__Chromobacteriaceae	g__unclassified_f__Chromobacteriaceae	s__unclassified_f__Chromobacteriaceae	OTU6130	2	3	26	0	2	0	1	0	1	15	6	20	2	3	0	81
d__Bacteria	k__norank_d__Bacteria	p__Chloroflexi	c__Ktedonobacteria	o__Ktedonobacterales	f__Ktedonobacteraceae	g__JG30a-KF-32	s__unclassified_g__JG30a-KF-32	OTU1046	0	0	0	10	1	7	3	2	0	0	2	0	1	0	0	26
d__Bacteria	k__norank_d__Bacteria	p__Planctomycetota	c__Planctomycetes	o__Gemmatales	f__Gemmataceae	g__norank_f__Gemmataceae	s__unclassified_g__norank_f__Gemmataceae	OTU5010	0	0	0	0	0	0	0	0	0	0	0	0	3	0	0	3
d__Bacteria	k__norank_d__Bacteria	p__Firmicutes	c__Bacilli	o__unclassified_c__Bacilli	f__unclassified_c__Bacilli	g__unclassified_c__Bacilli	s__unclassified_c__Bacilli	OTU1379	0	2	0	0	0	3	0	0	0	2	0	0	0	2	1	10
d__Bacteria	k__norank_d__Bacteria	p__Gemmatimonadota	c__Gemmatimonadetes	o__Gemmatimonadales	f__Gemmatimonadaceae	g__norank_f__Gemmatimonadaceae	s__uncultured_bacterium_g__norank_f__Gemmatimonadaceae	OTU4617	0	0	0	0	0	0	0	0	1	0	0	0	0	1	0	2
d__Bacteria	k__norank_d__Bacteria	p__Bacteroidota	c__Kapabacteria	o__Kapabacteriales	f__norank_o__Kapabacteriales	g__norank_f__norank_o__Kapabacteriales	s__uncultured_bacterium_KF-JG30-B11	OTU4535	0	0	0	0	0	0	0	0	0	0	0	0	0	1	0	1
d__Bacteria	k__norank_d__Bacteria	p__Acidobacteriota	c__Acidobacteriae	o__Acidobacteriales	f__norank_o__Acidobacteriales	g__norank_f__norank_o__Acidobacteriales	s__uncultured_Acidobacteriaceae_bacterium_g__norank_f__norank	OTU150	1	3	3	0	2	8	0	0	0	0	0	0	1	1	3	22
d__Bacteria	k__norank_d__Bacteria	p__Acidobacteriota	c__Acidobacteriae	o__Subgroup_2	f__norank_o__Subgroup_2	g__norank_f__norank_o__Subgroup_2	s__uncultured_Holophaga_sp._g__norank_f__norank_o__Subgroup_2	OTU1179	17	26	22	38	96	96	134	47	180	3	20	41	36	12	5	773
d__Bacteria	k__norank_d__Bacteria	p__Armatimonadota	c__Armatimonadia	o__Armatimonadales	f__norank_o__Armatimonadales	g__norank_f__norank_o__Armatimonadales	s__unclassified_g__norank_f__norank_o__Armatimonadales	OTU3735	0	0	0	0	0	0	0	0	0	0	0	1	0	0	0	1
d__Bacteria	k__norank_d__Bacteria	p__Acidobacteriota	c__Vicinamibacteria	o__Vicinamibacterales	f__norank_o__Vicinamibacterales	g__norank_f__norank_o__Vicinamibacterales	s__uncultured_Acidobacteriales_bacterium_g__norank_f__norank_o__Vicinamibacterales	OTU493	21	1	83	4	6	2	4	0	0	19	64	0	0	0	27	231
d__Bacteria	k__norank_d__Bacteria	p__Proteobacteria	c__Alphaproteobacteria	o__Elsterales	f__norank_o__Elsterales	g__norank_f__norank_o__Elsterales	s__unclassified_g__norank_f__norank_o__Elsterales	OTU101	9	10	1	4	1	4	7	2	6	1	1	0	5	0	0	51
d__Bacteria	k__norank_d__Bacteria	p__Proteobacteria	c__Gammaproteobacteria	o__Gammaproteobacteria_Incertae_Sedis	f__unclassified_o__Gammaproteobacteria_Incertae_Sedis	g__norank_f__unclassified	s__unclassified_g__norank_f__unclassified	OTU2257	0	1	0	0	0	0	0	0	1	0	0	0	0	0	0	2
d__Bacteria	k__norank_d__Bacteria	p__Bdellovibrionota	c__Bdellovibrionia	o__Bdellovibrionales	f__Bdellovibrionaceae	g__Bdellovibrio	s__Bdellovibrio_bacteriovorus	OTU3694	0	0	0	0	0	0	0	0	0	2	0	2	0	0	1	5
d__Bacteria	k__norank_d__Bacteria	p__Armatimonadota	c__Chthonomonadetes	o__Chthonomonadales	f__Chthonomonadaceae	g__Chthonomonas	s__uncultured_Armatimonadetes_bacterium_g__Chthonomonas	OTU641	1	0	2	0	3	4	2	0	3	0	0	0	1	0	0	16
d__Bacteria	k__norank_d__Bacteria	p__Cyanobacteria	c__Cyanobacteriia	o__Chloroplast	f__norank_o__Chloroplast	g__norank_f__norank_o__Chloroplast	s__unclassified_g__norank_f__norank_o__Chloroplast	OTU700	0	0	1	0	0	0	0	0	0	0	0	0	0	1	0	2
d__Bacteria	k__norank_d__Bacteria	p__Cyanobacteria	c__Sericytochromatia	o__norank_c__Sericytochromatia	f__norank_o__norank_c__Sericytochromatia	g__norank_f__norank_o__norank_c__Sericytochromatia	s__uncultured_bacterium_g__norank_f__norank_o__norank_c__Sericytochromatia	OTU596	0	0	6	1	0	0	2	0	0	0	0	1	2	0	0	12
d__Bacteria	k__norank_d__Bacteria	p__Verrucomicrobiota	c__Chlamydiae	o__Chlamydiales	f__Simkaniaceae	g__norank_f__Simkaniaceae	s__unclassified_g__norank_f__Simkaniaceae	OTU1649	0	0	1	0	1	0	3	3	0	0	2	0	0	0	0	10
d__Bacteria	k__norank_d__Bacteria	p__Verrucomicrobiota	c__Chlamydiae	o__Chlamydiales	f__Simkaniaceae	g__norank_f__Simkaniaceae	s__unclassified_g__norank_f__Simkaniaceae	OTU1647	0	0	0	0	0	0	1	0	0	0	0	1	0	0	0	2
d__Bacteria	k__norank_d__Bacteria	p__Chloroflexi	c__unclassified_p__Chloroflexi	o__unclassified_p__Chloroflexi	f__unclassified_p__Chloroflexi	g__unclassified_p__Chloroflexi	s__unclassified_p__Chloroflexi	OTU2765	0	0	0	0	0	0	0	0	2	0	0	0	0	0	0	2
d__Bacteria	k__norank_d__Bacteria	p__Actinobacteriota	c__Acidimicrobiia	o__Microtrichales	f__Ilumatobacteraceae	g__norank_f__Ilumatobacteraceae	s__uncultured_bacterium_g__norank_f__Ilumatobacteraceae	OTU3564	0	3	3	0	0	6	0	0	2	1	0	2	0	1	0	18
d__Bacteria	k__norank_d__Bacteria	p__Proteobacteria	c__Alphaproteobacteria	o__Rhizobiales	f__A0839	g__norank_f__A0839	s__unclassified_g__norank_f__A0839	OTU5480	0	0	1	0	0	0	0	0	0	3	1	0	0	0	6	11
d__Bacteria	k__norank_d__Bacteria	p__Proteobacteria	c__Gammaproteobacteria	o__Diplorickettsiales	f__Diplorickettsiaceae	g__unclassified_f__Diplorickettsiaceae	s__unclassified_f__Diplorickettsiaceae	OTU2852	11	0	0	0	0	0	0	0	0	1	0	0	0	0	0	12
d__Bacteria	k__norank_d__Bacteria	p__Planctomycetota	c__Planctomycetes	o__Isosphaerales	f__Isosphaeraceae	g__unclassified_f__Isosphaeraceae	s__unclassified_f__Isosphaeraceae	OTU6584	0	0	0	4	8	5	11	23	6	0	0	3	4	0	0	64
d__Bacteria	k__norank_d__Bacteria	p__Firmicutes	c__Bacilli	o__Paenibacillales	f__Paenibacillaceae	g__unclassified_f__Paenibacillaceae	s__unclassified_f__Paenibacillaceae	OTU6047	0	0	0	0	0	0	0	0	0	0	2	0	0	0	0	2
d__Bacteria	k__norank_d__Bacteria	p__Actinobacteriota	c__Actinobacteria	o__Propionibacteriales	f__Nocardioidaceae	g__Nocardioides	s__unclassified_g__Nocardioides	OTU1232	0	1	3	0	4	0	0	0	0	1	0	0	0	0	0	9
d__Bacteria	k__norank_d__Bacteria	p__WPS-2	c__norank_p__WPS-2	o__norank_c__norank_p__WPS-2	f__norank_o__norank_c__norank_p__WPS-2	g__norank_f__norank_o__norank_c__norank_p__WPS-2	s__uncultured_bacterium_g__norank_f__norank_o__norank_c__norank_p__WPS-2	OTU3622	0	0	10	11	0	36	0	0	3	0	0	19	0	1	3	83
d__Bacteria	k__norank_d__Bacteria	p__Bacteroidota	c__Bacteroidia	o__Sphingobacteriales	f__env.OPS_17	g__norank_f__env.OPS_17	s__uncultured_bacterium_g__norank_f__env.OPS_17	OTU4229	0	0	0	0	0	0	0	0	0	1	3	0	0	0	0	4
d__Bacteria	k__norank_d__Bacteria	p__Bacteroidota	c__Bacteroidia	o__Sphingobacteriales	f__Sphingobacteriaceae	g__Mucilaginibacter	s__uncultured_bacterium_g__Mucilaginibacter	OTU3918	3	20	13	5	0	12	3	6	0	0	0	0	0	0	0	62
d__Bacteria	k__norank_d__Bacteria	p__Verrucomicrobiota	c__Chlamydiae	o__Chlamydiales	f__Parachlamydiaceae	g__Neochlamydia	s__uncultured_bacterium_g__Neochlamydia	OTU6581	2	0	0	0	0	0	0	0	0	2	0	0	0	0	0	4
d__Bacteria	k__norank_d__Bacteria	p__Proteobacteria	c__Gammaproteobacteria	o__Diplorickettsiales	f__Diplorickettsiaceae	g__norank_f__Diplorickettsiaceae	s__unclassified_g__norank_f__Diplorickettsiaceae	OTU5312	0	0	0	0	0	0	0	0	1	0	0	0	0	3	0	4
d__Bacteria	k__norank_d__Bacteria	p__Actinobacteriota	c__Actinobacteria	o__Frankiales	f__Acidothermaceae	g__Acidothermus	s__uncultured_actinobacterium_g__Acidothermus	OTU3888	35	50	33	12	22	30	18	30	46	4	12	29	168	23	6	518
d__Bacteria	k__norank_d__Bacteria	p__Proteobacteria	c__Gammaproteobacteria	o__Diplorickettsiales	f__Diplorickettsiaceae	g__Aquicella	s__uncultured_bacterium_g__Aquicella	OTU2015	0	0	0	0	0	0	2	0	0	0	0	0	0	0	0	2
d__Bacteria	k__norank_d__Bacteria	p__Proteobacteria	c__Alphaproteobacteria	o__Defluviicoccales	f__Defluviicoccaceae	g__Defluviicoccus	s__metagenome_g__Defluviicoccus	OTU3058	0	0	0	0	0	0	0	0	0	2	0	0	0	0	0	2
d__Bacteria	k__norank_d__Bacteria	p__Firmicutes	c__Bacilli	o__Alicyclobacillales	f__Alicyclobacillaceae	g__Tumebacillus	s__uncultured_bacterium_g__Tumebacillus	OTU467	1	0	71	0	0	0	0	6	0	0	0	2	0	16	1	97
d__Bacteria	k__norank_d__Bacteria	p__Chloroflexi	c__Ktedonobacteria	o__Ktedonobacterales	f__JG30-KF-AS9	g__norank_f__JG30-KF-AS9	s__Chloroflexi_bacterium_Ellin7237	OTU339	3	2	0	0	0	1	0	0	0	0	0	0	0	0	0	6
d__Bacteria	k__norank_d__Bacteria	p__Bacteroidota	c__Bacteroidia	o__Bacteroidales	f__Prevotellaceae	g__Prevotella	s__Prevotella_intermedia	OTU422	0	0	2	0	0	0	0	0	0	0	2	0	0	0	0	4
d__Bacteria	k__norank_d__Bacteria	p__Gemmatimonadota	c__Gemmatimonadetes	o__Gemmatimonadales	f__Gemmatimonadaceae	g__unclassified_f__Gemmatimonadaceae	s__unclassified_f__Gemmatimonadaceae	OTU6008	0	2	0	0	0	0	0	0	0	0	0	0	0	0	0	2
d__Bacteria	k__norank_d__Bacteria	p__Verrucomicrobiota	c__Chlamydiae	o__Chlamydiales	f__Simkaniaceae	g__norank_f__Simkaniaceae	s__uncultured_bacterium_g__norank_f__Simkaniaceae	OTU667	1	0	38	0	1	0	0	0	2	0	0	0	0	0	0	42
d__Bacteria	k__norank_d__Bacteria	p__Acidobacteriota	c__Acidobacteriae	o__Subgroup_15	f__norank_o__Subgroup_15	g__norank_f__norank_o__Subgroup_15	s__uncultured_bacterium_g__norank_f__norank_o__Subgroup_15	OTU2565	0	0	0	0	0	0	0	2	0	0	0	0	0	0	0	2
d__Bacteria	k__norank_d__Bacteria	p__Proteobacteria	c__Gammaproteobacteria	o__Burkholderiales	f__unclassified_o__Burkholderiales	g__unclassified_o__Burkholderiales	s__unclassified_o__Burkholderiales	OTU6120	0	0	0	1	0	0	0	0	0	0	0	1	0	0	0	2
d__Bacteria	k__norank_d__Bacteria	p__Myxococcota	c__Polyangia	o__Haliangiales	f__Haliangiaceae	g__Haliangium	s__uncultured_bacterium_g__Haliangium	OTU376	0	0	2	0	0	0	0	0	0	2	0	0	0	0	0	4
d__Bacteria	k__norank_d__Bacteria	p__Myxococcota	c__Polyangia	o__Haliangiales	f__Haliangiaceae	g__Haliangium	s__metagenome_g__Haliangium	OTU3847	0	0	0	0	0	0	0	0	0	1	0	0	0	0	0	1
d__Bacteria	k__norank_d__Bacteria	p__Planctomycetota	c__Planctomycetes	o__Isosphaerales	f__Isosphaeraceae	g__Singulisphaera	s__unclassified_g__Singulisphaera	OTU6470	0	0	0	0	0	0	0	2	1	2	11	20	1	0	6	43
d__Bacteria	k__norank_d__Bacteria	p__Acidobacteriota	c__Acidobacteriae	o__Solibacterales	f__Solibacteraceae	g__Candidatus_Solibacter	s__unclassified_g__Candidatus_Solibacter	OTU3213	3	14	7	8	53	16	179	20	40	5	12	7	7	16	2	389
d__Bacteria	k__norank_d__Bacteria	p__Proteobacteria	c__Gammaproteobacteria	o__Diplorickettsiales	f__Diplorickettsiaceae	g__Aquicella	s__unclassified_g__Aquicella	OTU2416	0	0	0	0	0	0	0	4	0	0	0	0	4	0	0	8
d__Bacteria	k__norank_d__Bacteria	p__Chloroflexi	c__Chloroflexia	o__Thermomicrobiales	f__AKYG1722	g__norank_f__AKYG1722	s__uncultured_Chloroflexi_bacterium_g__norank_f__AKYG1722	OTU3130	0	1	0	0	0	0	0	0	0	15	0	0	0	0	0	16
d__Bacteria	k__norank_d__Bacteria	p__Chloroflexi	c__Ktedonobacteria	o__Ktedonobacterales	f__Ktedonobacteraceae	g__1921-3	s__uncultured_bacterium_g__1921-3	OTU4670	0	0	1	0	0	5	0	1	3	0	0	0	0	0	1	11
d__Bacteria	k__norank_d__Bacteria	p__Verrucomicrobiota	c__Verrucomicrobiae	o__Pedosphaerales	f__Pedosphaeraceae	g__norank_f__Pedosphaeraceae	s__uncultured_bacterium_g__norank_f__Pedosphaeraceae	OTU1851	0	0	2	1	3	5	9	10	7	0	0	0	8	1	2	48
d__Bacteria	k__norank_d__Bacteria	p__Verrucomicrobiota	c__Verrucomicrobiae	o__Pedosphaerales	f__Pedosphaeraceae	g__norank_f__Pedosphaeraceae	s__unclassified_g__norank_f__Pedosphaeraceae	OTU6589	3	1	8	3	0	3	0	0	1	0	0	1	0	1	0	21
d__Bacteria	k__norank_d__Bacteria	p__Acidobacteriota	c__Acidobacteriae	o__norank_c__Acidobacteriae	f__norank_o__norank_c__Acidobacteriae	g__Paludibaculum	s__unclassified_g__Paludibaculum	OTU2954	0	0	0	0	0	0	0	0	0	4	0	0	0	0	0	4
d__Bacteria	k__norank_d__Bacteria	p__Chloroflexi	c__Ktedonobacteria	o__Ktedonobacterales	f__Ktedonobacteraceae	g__JG30a-KF-32	s__uncultured_Ktedobacteria_bacterium_g__JG30a-KF-32	OTU856	0	11	8	1	0	8	4	4	20	0	0	0	4	1	0	61
d__Bacteria	k__norank_d__Bacteria	p__Actinobacteriota	c__Actinobacteria	o__Corynebacteriales	f__Nocardiaceae	g__Smaragdicoccus	s__unclassified_g__Smaragdicoccus	OTU4577	2	3	3	2	0	1	0	2	1	1	0	0	0	0	0	15
d__Bacteria	k__norank_d__Bacteria	p__Acidobacteriota	c__Acidobacteriae	o__Acidobacteriales	f__Acidobacteriaceae_Subgroup_1	g__norank_f__Acidobacteriaceae_Subgroup_1	s__uncultured_forest_soil_bacterium_g__norank_f__Acidobacteriaceae_Subgroup_1	OTU3808	0	0	0	0	0	0	0	0	0	0	0	3	7	0	0	10
d__Bacteria	k__norank_d__Bacteria	p__Bacteroidota	c__Bacteroidia	o__Sphingobacteriales	f__Sphingobacteriaceae	g__Mucilaginibacter	s__uncultured_bacterium_g__Mucilaginibacter	OTU4943	3	12	9	12	11	16	5	9	10	8	2	62	11	5	5	180
d__Bacteria	k__norank_d__Bacteria	p__Proteobacteria	c__Gammaproteobacteria	o__Burkholderiales	f__Oxalobacteraceae	g__unclassified_f__Oxalobacteraceae	s__unclassified_f__Oxalobacteraceae	OTU3347	0	0	0	0	0	0	0	0	0	0	6	0	0	0	0	6
d__Bacteria	k__norank_d__Bacteria	p__Proteobacteria	c__Alphaproteobacteria	o__Elsterales	f__Elsteraceae	g__norank_f__Elsteraceae	s__uncultured_bacterium_g__norank_f__Elsteraceae	OTU1929	0	1	0	0	0	4	2	4	0	0	0	1	2	0	0	14
d__Bacteria	k__norank_d__Bacteria	p__Acidobacteriota	c__Subgroup_22	o__norank_c__Subgroup_22	f__norank_o__norank_c__Subgroup_22	g__norank_f__norank_o__norank_c__Subgroup_22	s__unclassified_g__norank_f__norank_o__norank_c__Subgroup_22	OTU3775	0	0	0	0	0	0	0	0	0	2	0	0	0	1	0	3
d__Bacteria	k__norank_d__Bacteria	p__Proteobacteria	c__Gammaproteobacteria	o__Diplorickettsiales	f__Diplorickettsiaceae	g__norank_f__Diplorickettsiaceae	s__uncultured_bacterium_g__norank_f__Diplorickettsiaceae	OTU2037	0	0	2	0	1	2	7	46	0	0	0	0	0	0	1	59
d__Bacteria	k__norank_d__Bacteria	p__Actinobacteriota	c__Thermoleophilia	o__Gaiellales	f__norank_o__Gaiellales	g__norank_f__norank_o__Gaiellales	s__unclassified_g__norank_f__norank_o__Gaiellales	OTU4100	12	9	6	3	5	4	4	2	7	13	29	23	6	6	2	131
d__Bacteria	k__norank_d__Bacteria	p__Actinobacteriota	c__Acidimicrobiia	o__unclassified_c__Acidimicrobiia	f__unclassified_c__Acidimicrobiia	g__unclassified_c__Acidimicrobiia	s__unclassified_c__Acidimicrobiia	OTU1054	0	5	0	4	3	0	0	0	5	0	4	1	1	4	0	27
d__Bacteria	k__norank_d__Bacteria	p__Verrucomicrobiota	c__Verrucomicrobiae	o__Pedosphaerales	f__Pedosphaeraceae	g__norank_f__Pedosphaeraceae	s__unclassified_g__norank_f__Pedosphaeraceae	OTU1854	0	1	0	0	5	0	18	3	5	0	0	0	6	1	0	39
d__Bacteria	k__norank_d__Bacteria	p__Verrucomicrobiota	c__Chlamydiae	o__Chlamydiales	f__Simkaniaceae	g__norank_f__Simkaniaceae	s__unclassified_g__norank_f__Simkaniaceae	OTU2505	0	0	0	0	0	0	1	2	0	0	0	0	0	0	0	3
d__Bacteria	k__norank_d__Bacteria	p__Proteobacteria	c__Gammaproteobacteria	o__Diplorickettsiales	f__Diplorickettsiaceae	g__norank_f__Diplorickettsiaceae	s__unclassified_g__norank_f__Diplorickettsiaceae	OTU1768	0	0	0	3	0	0	0	0	0	0	0	0	1	0	0	4
d__Bacteria	k__norank_d__Bacteria	p__Bacteroidota	c__Bacteroidia	o__Chitinophagales	f__Chitinophagaceae	g__Parafilimonas	s__uncultured_bacterium_g__Parafilimonas	OTU5819	0	2	0	0	0	0	0	1	0	8	12	2	0	0	2	27
d__Bacteria	k__norank_d__Bacteria	p__Proteobacteria	c__Alphaproteobacteria	o__Sphingomonadales	f__Sphingomonadaceae	g__Porphyrobacter	s__unclassified_g__Porphyrobacter	OTU2514	6	1	5	2	16	0	0	6	0	27	4	8	0	10	10	95
d__Bacteria	k__norank_d__Bacteria	p__Chloroflexi	c__Ktedonobacteria	o__Ktedonobacterales	f__Ktedonobacteraceae	g__1921-2	s__uncultured_bacterium_g__1921-2	OTU6465	0	10	1	0	0	2	18	0	1	0	0	5	6	7	0	50
d__Bacteria	k__norank_d__Bacteria	p__Chloroflexi	c__TK10	o__norank_c__TK10	f__norank_o__norank_c__TK10	g__norank_f__norank_o__norank_c__TK10	s__uncultured_Chloroflexi_bacterium_g__norank_f__norank_o__norank_c__TK10	OTU5591	1	0	1	0	0	0	0	0	0	3	0	1	0	2	3	11
d__Bacteria	k__norank_d__Bacteria	p__Chloroflexi	c__Chloroflexia	o__Chloroflexales	f__Roseiflexaceae	g__norank_f__Roseiflexaceae	s__uncultured_bacterium_g__norank_f__Roseiflexaceae	OTU2992	0	0	0	0	0	0	0	0	0	3	0	0	0	0	0	3
d__Bacteria	k__norank_d__Bacteria	p__Bdellovibrionota	c__Oligoflexia	o__0319-6G20	f__norank_o__0319-6G20	g__norank_f__norank_o__0319-6G20	s__uncultured_Syntrophobacteraceae_bacterium_g__norank	OTU1294	0	2	1	1	5	1	4	2	0	0	0	0	1	2	0	19
d__Bacteria	k__norank_d__Bacteria	p__Cyanobacteria	c__Cyanobacteriia	o__Chloroplast	f__norank_o__Chloroplast	g__norank_f__norank_o__Chloroplast	s__Tetradesmus_obliquus	OTU522	1	0	3	2	4	0	0	0	0	0	0	1	1	0	0	12
d__Bacteria	k__norank_d__Bacteria	p__Planctomycetota	c__Phycisphaerae	o__Phycisphaerales	f__Phycisphaeraceae	g__SM1A02	s__metagenome_g__SM1A02	OTU5635	0	0	0	0	0	0	0	0	0	0	0	0	0	0	3	3
d__Bacteria	k__norank_d__Bacteria	p__Chloroflexi	c__Ktedonobacteria	o__B12-WMSP1	f__norank_o__B12-WMSP1	g__norank_f__norank_o__B12-WMSP1	s__uncultured_Chloroflexi_bacterium_g__norank_f__norank_o__B12-WMSP1	OTU6568	0	0	0	0	0	1	1	0	0	0	0	0	0	0	0	2
d__Bacteria	k__norank_d__Bacteria	p__Verrucomicrobiota	c__Verrucomicrobiae	o__Chthoniobacterales	f__Chthoniobacteraceae	g__Chthoniobacter	s__uncultured_bacterium_g__Chthoniobacter	OTU6205	0	1	0	2	1	0	0	3	1	0	0	0	0	0	0	8
d__Bacteria	k__norank_d__Bacteria	p__Verrucomicrobiota	c__Verrucomicrobiae	o__Pedosphaerales	f__Pedosphaeraceae	g__norank_f__Pedosphaeraceae	s__unclassified_g__norank_f__Pedosphaeraceae	OTU4374	0	1	1	0	0	0	0	0	0	0	0	0	1	1	1	5
d__Bacteria	k__norank_d__Bacteria	p__Firmicutes	c__Bacilli	o__Paenibacillales	f__Paenibacillaceae	g__Paenibacillus	s__unclassified_g__Paenibacillus	OTU5426	0	0	3	1	0	11	1	0	1	1	0	0	1	13	7	39
d__Bacteria	k__norank_d__Bacteria	p__Proteobacteria	c__Alphaproteobacteria	o__Paracaedibacterales	f__Paracaedibacteraceae	g__norank_f__Paracaedibacteraceae	s__uncultured_bacterium_g__norank_f__Paracaedibacteraceae	OTU5926	0	0	0	1	0	0	0	0	0	0	0	0	0	0	0	1
d__Bacteria	k__norank_d__Bacteria	p__Chloroflexi	c__Ktedonobacteria	o__B10-SB3A	f__norank_o__B10-SB3A	g__norank_f__norank_o__B10-SB3A	s__uncultured_bacterium_g__norank_f__norank_o__B10-SB3A	OTU3592	0	0	0	0	0	0	2	0	0	2	0	3	0	0	0	7
d__Bacteria	k__norank_d__Bacteria	p__Myxococcota	c__Polyangia	o__Polyangiales	f__Polyangiaceae	g__Polyangium	s__uncultured_bacterium_g__Polyangium	OTU4776	2	1	0	2	0	2	1	13	0	0	0	0	0	7	0	28
d__Bacteria	k__norank_d__Bacteria	p__Actinobacteriota	c__unclassified_p__Actinobacteriota	o__unclassified_p__Actinobacteriota	f__unclassified_p__Actinobacteriota	g__unclassified_p__Actinobacteriota	s__unclassified_p__Actinobacteriota	OTU1192	0	0	0	0	2	0	0	0	0	0	0	0	0	0	0	2
d__Bacteria	k__norank_d__Bacteria	p__Proteobacteria	c__Alphaproteobacteria	o__Tistrellales	f__Geminicoccaceae	g__Candidatus_Alysiosphaera	s__unclassified_g__Candidatus_Alysiosphaera	OTU5673	0	0	2	0	1	0	0	0	0	1	3	0	0	0	1	8
d__Bacteria	k__norank_d__Bacteria	p__Proteobacteria	c__Alphaproteobacteria	o__Caedibacterales	f__Caedibacteraceae	g__Caedibacter	s__Caedimonas_varicaedens	OTU415	0	0	3	0	0	0	0	0	2	0	0	0	0	0	0	5
d__Bacteria	k__norank_d__Bacteria	p__Chloroflexi	c__Anaerolineae	o__SBR1031	f__A4b	g__norank_f__A4b	s__uncultured_sludge_bacterium_H8	OTU4008	0	0	1	0	1	0	0	0	0	0	0	0	0	0	9	11
d__Bacteria	k__norank_d__Bacteria	p__Acidobacteriota	c__Blastocatellia	o__Pyrinomonadales	f__Pyrinomonadaceae	g__RB41	s__unclassified_g__RB41	OTU5944	0	1	4	0	0	0	0	1	0	2	0	0	0	0	1	9
d__Bacteria	k__norank_d__Bacteria	p__Chloroflexi	c__Chloroflexia	o__Elev-1554	f__norank_o__Elev-1554	g__norank_f__norank_o__Elev-1554	s__uncultured_bacterium_g__norank_f__norank_o__Elev-1554	OTU3673	0	0	0	0	0	0	0	0	0	0	1	1	0	0	0	2
d__Bacteria	k__norank_d__Bacteria	p__Firmicutes	c__Bacilli	o__Paenibacillales	f__Paenibacillaceae	g__Paenibacillus	s__unclassified_g__Paenibacillus	OTU643	0	2	1	1	2	0	0	1	0	1	0	0	3	0	1	12
d__Bacteria	k__norank_d__Bacteria	p__Actinobacteriota	c__Actinobacteria	o__Micrococcales	f__Dermabacteraceae	g__Dermabacter	s__unclassified_g__Dermabacter	OTU5199	0	0	6	1	2	0	0	1	0	0	0	0	0	0	0	10
d__Bacteria	k__norank_d__Bacteria	p__Proteobacteria	c__Alphaproteobacteria	o__Elsterales	f__norank_o__Elsterales	g__norank_f__norank_o__Elsterales	s__uncultured_bacterium_g__norank_f__norank_o__Elsterales	OTU2579	1	0	0	0	0	3	1	1	4	0	3	0	1	0	0	14
d__Bacteria	k__norank_d__Bacteria	p__Acidobacteriota	c__Blastocatellia	o__11-24	f__norank_o__11-24	g__norank_f__norank_o__11-24	s__unclassified_g__norank_f__norank_o__11-24	OTU1401	0	0	0	0	0	2	1	0	0	0	0	0	0	0	0	3
d__Bacteria	k__norank_d__Bacteria	p__Proteobacteria	c__Gammaproteobacteria	o__Diplorickettsiales	f__Diplorickettsiaceae	g__norank_f__Diplorickettsiaceae	s__unclassified_g__norank_f__Diplorickettsiaceae	OTU2908	0	0	0	0	0	0	0	0	0	2	2	0	0	0	1	5
d__Bacteria	k__norank_d__Bacteria	p__Proteobacteria	c__Alphaproteobacteria	o__Rickettsiales	f__unclassified_o__Rickettsiales	g__unclassified_o__Rickettsiales	s__unclassified_o__Rickettsiales	OTU5762	0	0	0	0	0	1	0	0	0	0	0	0	0	0	0	1
d__Bacteria	k__norank_d__Bacteria	p__Verrucomicrobiota	c__Verrucomicrobiae	o__Chthoniobacterales	f__Chthoniobacteraceae	g__Chthoniobacter	s__metagenome_g__Chthoniobacter	OTU505	0	0	10	0	0	0	0	0	0	1	0	0	0	0	0	11
d__Bacteria	k__norank_d__Bacteria	p__Elusimicrobiota	c__Elusimicrobia	o__Lineage_IV	f__norank_o__Lineage_IV	g__norank_f__norank_o__Lineage_IV	s__uncultured_soil_bacterium_g__norank_f__norank_o__Lineage_IV	OTU3784	0	0	0	0	0	1	0	0	1	0	0	0	0	0	0	2
d__Bacteria	k__norank_d__Bacteria	p__Chloroflexi	c__Ktedonobacteria	o__Ktedonobacterales	f__Ktedonobacteraceae	g__HSB_OF53-F07	s__unclassified_g__HSB_OF53-F07	OTU3629	0	0	0	0	0	0	0	0	0	1	28	4	0	0	1	34
d__Bacteria	k__norank_d__Bacteria	p__Actinobacteriota	c__Acidimicrobiia	o__Microtrichales	f__Ilumatobacteraceae	g__norank_f__Ilumatobacteraceae	s__unclassified_g__norank_f__Ilumatobacteraceae	OTU3018	2	0	0	0	0	0	0	0	0	7	1	0	0	0	1	11
d__Bacteria	k__norank_d__Bacteria	p__Proteobacteria	c__Gammaproteobacteria	o__Gammaproteobacteria_Incertae_Sedis	f__unclassified_o__Gammaproteobacteria_Incertae_Sedis	g__Candidatus_Berkiella	s__uncultured_bacterium_g__Candidatus_Berkiella	OTU5089	0	0	0	0	0	0	0	0	0	0	0	1	0	0	0	1
d__Bacteria	k__norank_d__Bacteria	p__Planctomycetota	c__Planctomycetes	o__Gemmatales	f__Gemmataceae	g__norank_f__Gemmataceae	s__uncultured_planctomycete_g__norank_f__Gemmataceae	OTU6397	0	0	0	0	1	0	3	4	0	0	0	0	3	3	0	14
d__Bacteria	k__norank_d__Bacteria	p__Proteobacteria	c__Alphaproteobacteria	o__Acetobacterales	f__Acetobacteraceae	g__norank_f__Acetobacteraceae	s__uncultured_Acetobacteraceae_bacterium_g__norank_f__Acetobacteraceae	OTU5012	0	0	0	1	0	0	0	1	0	0	0	1	6	0	0	9
d__Bacteria	k__norank_d__Bacteria	p__Proteobacteria	c__Gammaproteobacteria	o__Diplorickettsiales	f__Diplorickettsiaceae	g__norank_f__Diplorickettsiaceae	s__unclassified_g__norank_f__Diplorickettsiaceae	OTU2028	0	0	0	0	0	0	1	0	0	0	0	0	0	0	0	1
d__Bacteria	k__norank_d__Bacteria	p__Actinobacteriota	c__Acidimicrobiia	o__Microtrichales	f__norank_o__Microtrichales	g__norank_f__norank_o__Microtrichales	s__unclassified_g__norank_f__norank_o__Microtrichales	OTU3612	0	10	1	0	1	1	0	3	1	5	0	3	0	0	0	25
d__Bacteria	k__norank_d__Bacteria	p__Planctomycetota	c__Planctomycetes	o__Isosphaerales	f__Isosphaeraceae	g__Singulisphaera	s__uncultured_bacterium_g__Singulisphaera	OTU5043	15	12	18	14	21	21	52	71	33	1	6	33	67	3	4	371
d__Bacteria	k__norank_d__Bacteria	p__Patescibacteria	c__Saccharimonadia	o__Saccharimonadales	f__LWQ8	g__norank_f__LWQ8	s__uncultured_bacterium_g__norank_f__LWQ8	OTU4945	3	0	0	1	16	3	0	1	3	0	0	2	5	0	0	34
d__Bacteria	k__norank_d__Bacteria	p__Actinobacteriota	c__Actinobacteria	o__unclassified_c__Actinobacteria	f__unclassified_c__Actinobacteria	g__unclassified_c__Actinobacteria	s__unclassified_c__Actinobacteria	OTU206	0	4	2	0	0	0	0	0	0	0	0	0	0	0	0	6
d__Bacteria	k__norank_d__Bacteria	p__Elusimicrobiota	c__Elusimicrobia	o__Lineage_IV	f__norank_o__Lineage_IV	g__norank_f__norank_o__Lineage_IV	s__uncultured_bacterium_g__norank_f__norank_o__Lineage_IV	OTU4816	0	0	0	0	1	0	0	0	0	0	0	0	0	0	0	1
d__Bacteria	k__norank_d__Bacteria	p__Planctomycetota	c__Phycisphaerae	o__Phycisphaerales	f__Phycisphaeraceae	g__norank_f__Phycisphaeraceae	s__unclassified_g__norank_f__Phycisphaeraceae	OTU4953	0	1	0	0	1	2	2	0	0	1	0	1	4	0	0	12
d__Bacteria	k__norank_d__Bacteria	p__Proteobacteria	c__Alphaproteobacteria	o__Elsterales	f__norank_o__Elsterales	g__norank_f__norank_o__Elsterales	s__unclassified_g__norank_f__norank_o__Elsterales	OTU3475	8	12	1	14	27	10	54	8	25	3	46	10	2	8	4	232
d__Bacteria	k__norank_d__Bacteria	p__Chloroflexi	c__Ktedonobacteria	o__Ktedonobacterales	f__unclassified_o__Ktedonobacterales	g__unclassified_o__Ktedonobacterales	s__unclassified_o__Ktedonobacterales	OTU4450	0	0	0	0	0	0	0	0	0	0	0	0	0	6	0	6
d__Bacteria	k__norank_d__Bacteria	p__Proteobacteria	c__Gammaproteobacteria	o__Burkholderiales	f__Burkholderiaceae	g__Burkholderia-Caballeronia-Paraburkholderia	s__unclassified_g__Burkholderia-Caballeronia-Paraburkholderia	OTU1476	19	21	5	127	15	22	6	26	5	4	3	5	1	10	9	278
d__Bacteria	k__norank_d__Bacteria	p__Proteobacteria	c__Alphaproteobacteria	o__Kiloniellales	f__Fodinicurvataceae	g__norank_f__Fodinicurvataceae	s__unclassified_g__norank_f__Fodinicurvataceae	OTU3054	0	0	0	0	0	0	0	0	0	7	0	0	0	0	0	7
d__Bacteria	k__norank_d__Bacteria	p__Actinobacteriota	c__Acidimicrobiia	o__unclassified_c__Acidimicrobiia	f__unclassified_c__Acidimicrobiia	g__unclassified_c__Acidimicrobiia	s__unclassified_c__Acidimicrobiia	OTU4406	4	0	0	0	0	0	0	0	0	1	0	0	0	0	0	5
d__Bacteria	k__norank_d__Bacteria	p__Chloroflexi	c__Anaerolineae	o__SBR1031	f__norank_o__SBR1031	g__norank_f__norank_o__SBR1031	s__uncultured_Gemmatimonadetes_bacterium_g__norank_f__norank	OTU3941	2	9	7	0	0	1	0	0	1	1	3	7	0	6	0	37
d__Bacteria	k__norank_d__Bacteria	p__Acidobacteriota	c__Acidobacteriae	o__Acidobacteriales	f__Koribacteraceae	g__Candidatus_Koribacter	s__uncultured_bacterium_g__Candidatus_Koribacter	OTU1878	79	130	186	255	216	186	359	151	385	7	53	125	106	73	27	2338
d__Bacteria	k__norank_d__Bacteria	p__Cyanobacteria	c__Vampirivibrionia	o__Vampirovibrionales	f__norank_o__Vampirovibrionales	g__norank_f__norank_o__Vampirovibrionales	s__uncultured_bacterium_g__norank_f__norank_o__Vampirovibrionales	OTU2422	0	0	0	0	0	0	1	3	4	0	0	0	1	0	0	9
d__Bacteria	k__norank_d__Bacteria	p__Planctomycetota	c__Phycisphaerae	o__Phycisphaerales	f__Phycisphaeraceae	g__SM1A02	s__metagenome_g__SM1A02	OTU3856	0	0	0	0	2	1	0	0	0	0	0	0	0	1	0	4
d__Bacteria	k__norank_d__Bacteria	p__Myxococcota	c__Polyangia	o__Polyangiales	f__Polyangiaceae	g__Pajaroellobacter	s__uncultured_Polyangiaceae_bacterium_g__Pajaroellobacter	OTU3833	18	32	27	23	72	94	84	72	82	24	27	75	61	49	18	758
d__Bacteria	k__norank_d__Bacteria	p__Patescibacteria	c__Saccharimonadia	o__Saccharimonadales	f__norank_o__Saccharimonadales	g__norank_f__norank_o__Saccharimonadales	s__unclassified_g__norank_f__norank_o__Saccharimonadales	OTU5564	0	0	0	0	0	0	0	0	0	0	0	0	0	0	2	2
d__Bacteria	k__norank_d__Bacteria	p__Planctomycetota	c__Planctomycetes	o__Gemmatales	f__Gemmataceae	g__norank_f__Gemmataceae	s__uncultured_planctomycete_g__norank_f__Gemmataceae	OTU890	8	1	5	1	17	8	29	12	13	1	0	1	6	1	0	103
d__Bacteria	k__norank_d__Bacteria	p__Proteobacteria	c__Alphaproteobacteria	o__Elsterales	f__norank_o__Elsterales	g__norank_f__norank_o__Elsterales	s__uncultured_bacterium_g__norank_f__norank_o__Elsterales	OTU1120	0	0	1	4	0	0	0	0	0	0	0	2	0	0	0	7
d__Bacteria	k__norank_d__Bacteria	p__Patescibacteria	c__Saccharimonadia	o__Saccharimonadales	f__unclassified_o__Saccharimonadales	g__unclassified_o__Saccharimonadales	s__unclassified_o__Saccharimonadales	OTU2415	0	0	0	0	0	0	2	2	0	0	0	1	2	0	0	7
d__Bacteria	k__norank_d__Bacteria	p__Bacteroidota	c__Bacteroidia	o__Sphingobacteriales	f__Sphingobacteriaceae	g__Solitalea	s__Solitalea_canadensis	OTU2918	0	0	0	0	0	0	0	0	0	12	2	0	0	0	0	14
d__Bacteria	k__norank_d__Bacteria	p__Verrucomicrobiota	c__Verrucomicrobiae	o__S-BQ2-57_soil_group	f__norank_o__S-BQ2-57_soil_group	g__norank_f__norank_o__S-BQ2-57_soil_group	s__uncultured_bacterium_g__norank_f__norank_o__S-BQ2-57_soil_group	OTU1906	0	0	2	3	0	1	6	2	1	0	0	1	1	0	0	17
d__Bacteria	k__norank_d__Bacteria	p__Armatimonadota	c__Chthonomonadetes	o__Chthonomonadales	f__Chthonomonadaceae	g__Chthonomonas	s__uncultured_bacterium_g__Chthonomonas	OTU5354	0	0	0	0	1	0	0	2	1	0	2	2	0	7	0	15
d__Bacteria	k__norank_d__Bacteria	p__Chloroflexi	c__Ktedonobacteria	o__Ktedonobacterales	f__Ktedonobacteraceae	g__unclassified_f__Ktedonobacteraceae	s__unclassified_f__Ktedonobacteraceae	OTU525	0	0	2	0	0	0	0	0	0	0	0	0	0	0	0	2
d__Bacteria	k__norank_d__Bacteria	p__Proteobacteria	c__Alphaproteobacteria	o__norank_c__Alphaproteobacteria	f__norank_o__norank_c__Alphaproteobacteria	g__norank_f__norank_o__norank_c__Alphaproteobacteria	s__unclassified_g__norank_f__norank_o__norank_c__Alphaproteobacteria	OTU3005	0	0	1	0	2	0	0	0	0	5	5	2	2	28	3	48
d__Bacteria	k__norank_d__Bacteria	p__Chloroflexi	c__Ktedonobacteria	o__Ktedonobacterales	f__Ktedonobacteraceae	g__FCPS473	s__uncultured_Ktedobacteria_bacterium_g__FCPS473	OTU260	0	3	1	0	0	0	1	0	0	0	0	0	0	0	0	5
d__Bacteria	k__norank_d__Bacteria	p__Bacteroidota	c__Bacteroidia	o__Chitinophagales	f__Chitinophagaceae	g__Puia	s__uncultured_bacterium_g__Puia	OTU5979	22	43	27	25	29	56	70	39	19	11	10	82	63	19	20	535
d__Bacteria	k__norank_d__Bacteria	p__Bacteroidota	c__Bacteroidia	o__Chitinophagales	f__Chitinophagaceae	g__Aurantisolimonas	s__unclassified_g__Aurantisolimonas	OTU5611	0	0	0	0	0	0	1	0	0	41	48	1	0	0	6	97
d__Bacteria	k__norank_d__Bacteria	p__NB1-j	c__norank_p__NB1-j	o__norank_c__norank_p__NB1-j	f__norank_o__norank_c__norank_p__NB1-j	g__norank_f__norank_o__norank_c__norank_p__NB1-j	s__uncultured_bacterium_g__norank_f__norank_o__norank_c__norank_p__NB1-j	OTU4675	0	0	0	0	0	0	0	0	0	5	0	0	0	0	0	5
d__Bacteria	k__norank_d__Bacteria	p__Chloroflexi	c__JG30-KF-CM66	o__norank_c__JG30-KF-CM66	f__norank_o__norank_c__JG30-KF-CM66	g__norank_f__norank_o__norank_c__JG30-KF-CM66	s__unclassified_g__norank_f__norank_o__norank_c__JG30-KF-CM66	OTU2267	0	1	0	0	0	0	0	1	0	0	0	0	0	0	0	2
d__Bacteria	k__norank_d__Bacteria	p__Actinobacteriota	c__Actinobacteria	o__Micromonosporales	f__Micromonosporaceae	g__Luedemannella	s__unclassified_g__Luedemannella	OTU3385	0	0	1	1	2	0	0	0	1	5	8	3	0	25	1	47
d__Bacteria	k__norank_d__Bacteria	p__Actinobacteriota	c__Actinobacteria	o__Streptomycetales	f__Streptomycetaceae	g__Streptomyces	s__unclassified_g__Streptomyces	OTU3607	10	100	150	31	2	9	13	10	41	221	138	57	2	8	11	803
d__Bacteria	k__norank_d__Bacteria	p__Chloroflexi	c__TK10	o__norank_c__TK10	f__norank_o__norank_c__TK10	g__norank_f__norank_o__norank_c__TK10	s__unclassified_g__norank_f__norank_o__norank_c__TK10	OTU5211	0	0	2	0	0	0	0	0	0	0	0	0	0	0	0	2
d__Bacteria	k__norank_d__Bacteria	p__Proteobacteria	c__Gammaproteobacteria	o__EC3	f__norank_o__EC3	g__norank_f__norank_o__EC3	s__uncultured_bacterium_g__norank_f__norank_o__EC3	OTU1793	0	0	0	0	0	0	0	0	1	0	0	0	0	0	0	1
d__Bacteria	k__norank_d__Bacteria	p__Acidobacteriota	c__Blastocatellia	o__11-24	f__norank_o__11-24	g__norank_f__norank_o__11-24	s__Acidobacteria_bacterium_Ellin7246	OTU5493	0	0	0	0	0	0	0	0	0	0	0	0	0	0	1	1
d__Bacteria	k__norank_d__Bacteria	p__Chloroflexi	c__Ktedonobacteria	o__Ktedonobacterales	f__Ktedonobacteraceae	g__JG30a-KF-32	s__unclassified_g__JG30a-KF-32	OTU2760	0	0	0	0	0	0	0	0	4	0	0	0	0	0	0	4
d__Bacteria	k__norank_d__Bacteria	p__Bdellovibrionota	c__Bdellovibrionia	o__Bdellovibrionales	f__Bdellovibrionaceae	g__Bdellovibrio	s__uncultured_bacterium_g__Bdellovibrio	OTU5446	0	5	2	0	2	2	1	2	2	2	0	2	2	2	8	32
d__Bacteria	k__norank_d__Bacteria	p__Actinobacteriota	c__Actinobacteria	o__Corynebacteriales	f__Mycobacteriaceae	g__Mycobacterium	s__unclassified_g__Mycobacterium	OTU874	76	40	63	31	112	57	76	88	53	17	17	75	83	18	9	815
d__Bacteria	k__norank_d__Bacteria	p__Chloroflexi	c__Chloroflexia	o__Thermomicrobiales	f__JG30-KF-CM45	g__norank_f__JG30-KF-CM45	s__unclassified_g__norank_f__JG30-KF-CM45	OTU3275	0	0	0	0	0	0	0	1	1	0	6	0	0	0	0	8
d__Bacteria	k__norank_d__Bacteria	p__Bacteroidota	c__Bacteroidia	o__Chitinophagales	f__norank_o__Chitinophagales	g__norank_f__norank_o__Chitinophagales	s__unclassified_g__norank_f__norank_o__Chitinophagales	OTU4823	0	0	0	0	0	0	0	0	0	0	0	0	1	0	0	1
d__Bacteria	k__norank_d__Bacteria	p__Bacteroidota	c__Bacteroidia	o__Chitinophagales	f__Chitinophagaceae	g__norank_f__Chitinophagaceae	s__uncultured_Sphingobacteriales_bacterium_g__norank_f__Chitinophagaceae	OTU3555	0	0	0	0	1	0	0	0	0	57	8	43	0	1	1	111
d__Bacteria	k__norank_d__Bacteria	p__Patescibacteria	c__Saccharimonadia	o__Saccharimonadales	f__WWH38	g__norank_f__WWH38	s__uncultured_bacterium_g__norank_f__WWH38	OTU1378	0	0	0	0	2	0	0	0	0	0	0	0	0	0	0	2
d__Bacteria	k__norank_d__Bacteria	p__Chloroflexi	c__AD3	o__norank_c__AD3	f__norank_o__norank_c__AD3	g__norank_f__norank_o__norank_c__AD3	s__unclassified_g__norank_f__norank_o__norank_c__AD3	OTU4747	0	0	0	0	1	0	3	0	0	0	4	2	0	0	4	14
d__Bacteria	k__norank_d__Bacteria	p__Actinobacteriota	c__Acidimicrobiia	o__IMCC26256	f__norank_o__IMCC26256	g__norank_f__norank_o__IMCC26256	s__unclassified_g__norank_f__norank_o__IMCC26256	OTU1141	17	39	10	20	27	18	9	8	29	4	15	9	6	20	7	238
d__Bacteria	k__norank_d__Bacteria	p__Verrucomicrobiota	c__Verrucomicrobiae	o__S-BQ2-57_soil_group	f__norank_o__S-BQ2-57_soil_group	g__norank_f__norank_o__S-BQ2-57_soil_group	s__uncultured_bacterium_g__norank_f__norank_o__S-BQ2-57_soil_group	OTU6596	0	0	0	1	0	0	0	5	3	0	0	0	0	0	0	9
d__Bacteria	k__norank_d__Bacteria	p__Actinobacteriota	c__Thermoleophilia	o__Solirubrobacterales	f__67-14	g__norank_f__67-14	s__Solirubrobacterales_bacterium_67-14	OTU2856	0	1	0	0	0	0	0	0	0	2	0	0	0	0	0	3
d__Bacteria	k__norank_d__Bacteria	p__Acidobacteriota	c__Acidobacteriae	o__Subgroup_12	f__norank_o__Subgroup_12	g__norank_f__norank_o__Subgroup_12	s__uncultured_bacterium_g__norank_f__norank_o__Subgroup_12	OTU1961	0	3	0	0	1	4	5	0	0	0	0	0	0	1	0	14
d__Bacteria	k__norank_d__Bacteria	p__Firmicutes	c__Bacilli	o__Thermoactinomycetales	f__Thermoactinomycetaceae	g__Risungbinella	s__unclassified_g__Risungbinella	OTU5740	0	0	0	0	0	0	0	0	0	0	0	0	1	0	0	1
d__Bacteria	k__norank_d__Bacteria	p__Verrucomicrobiota	c__Verrucomicrobiae	o__Chthoniobacterales	f__Chthoniobacteraceae	g__Candidatus_Udaeobacter	s__uncultured_Spartobacteria_bacterium_g__Candidatus_Udaeobacter	OTU1853	0	0	11	12	73	16	94	50	24	0	1	3	0	5	0	289
d__Bacteria	k__norank_d__Bacteria	p__Actinobacteriota	c__Actinobacteria	o__Catenulisporales	f__Actinospicaceae	g__Actinospica	s__Actinospica_sp.	OTU5694	0	0	0	0	31	0	36	5	0	0	0	0	0	0	0	72
d__Bacteria	k__norank_d__Bacteria	p__Gemmatimonadota	c__Gemmatimonadetes	o__Gemmatimonadales	f__Gemmatimonadaceae	g__Roseisolibacter	s__uncultured_Gemmatimonadetes_bacterium_g__Roseisolibacter	OTU6232	0	0	0	0	0	1	0	0	0	2	0	0	0	0	0	3
d__Bacteria	k__norank_d__Bacteria	p__Patescibacteria	c__Saccharimonadia	o__Saccharimonadales	f__unclassified_o__Saccharimonadales	g__unclassified_o__Saccharimonadales	s__unclassified_o__Saccharimonadales	OTU719	0	0	8	0	0	1	0	0	0	0	0	0	0	0	0	9
d__Bacteria	k__norank_d__Bacteria	p__Acidobacteriota	c__Acidobacteriae	o__Solibacterales	f__Solibacteraceae	g__Candidatus_Solibacter	s__uncultured_bacterium_g__Candidatus_Solibacter	OTU5296	2	4	6	7	0	8	1	0	1	6	4	0	3	19	3	64
d__Bacteria	k__norank_d__Bacteria	p__Actinobacteriota	c__Acidimicrobiia	o__unclassified_c__Acidimicrobiia	f__unclassified_c__Acidimicrobiia	g__unclassified_c__Acidimicrobiia	s__unclassified_c__Acidimicrobiia	OTU2930	0	0	0	0	0	0	0	0	0	3	2	0	0	0	0	5
d__Bacteria	k__norank_d__Bacteria	p__Verrucomicrobiota	c__Chlamydiae	o__Chlamydiales	f__Parachlamydiaceae	g__Neochlamydia	s__unclassified_g__Neochlamydia	OTU1291	0	0	0	0	2	0	0	0	0	0	0	0	0	0	0	2
d__Bacteria	k__norank_d__Bacteria	p__Myxococcota	c__Myxococcia	o__Myxococcales	f__Myxococcaceae	g__P3OB-42	s__uncultured_Archangiaceae_bacterium_g__P3OB-42	OTU5142	0	2	1	0	4	1	0	2	2	1	0	2	2	0	1	18
d__Bacteria	k__norank_d__Bacteria	p__Firmicutes	c__Bacilli	o__Paenibacillales	f__Paenibacillaceae	g__Cohnella	s__unclassified_g__Cohnella	OTU3655	0	3	0	0	0	1	0	1	1	1	3	5	0	0	3	18
d__Bacteria	k__norank_d__Bacteria	p__Myxococcota	c__Myxococcia	o__Myxococcales	f__Myxococcaceae	g__KD3-10	s__uncultured_bacterium_g__KD3-10	OTU6432	0	0	1	0	0	0	0	0	0	0	0	0	1	0	0	2
d__Bacteria	k__norank_d__Bacteria	p__Chloroflexi	c__Ktedonobacteria	o__Ktedonobacterales	f__Ktedonobacteraceae	g__Thermosporothrix	s__uncultured_bacterium_g__Thermosporothrix	OTU854	1	0	3	2	0	0	1	0	1	0	0	0	0	1	0	9
d__Bacteria	k__norank_d__Bacteria	p__Chloroflexi	c__Ktedonobacteria	o__Ktedonobacterales	f__Ktedonobacteraceae	g__1921-2	s__uncultured_bacterium_g__1921-2	OTU4294	0	0	0	0	0	0	1	0	0	0	0	0	0	1	0	2
d__Bacteria	k__norank_d__Bacteria	p__Chloroflexi	c__Ktedonobacteria	o__Ktedonobacterales	f__Ktedonobacteraceae	g__1921-2	s__uncultured_bacterium_g__1921-2	OTU4567	0	0	0	0	0	0	2	1	0	0	7	0	0	0	0	10
d__Bacteria	k__norank_d__Bacteria	p__Actinobacteriota	c__Actinobacteria	o__Micromonosporales	f__Micromonosporaceae	g__norank_f__Micromonosporaceae	s__uncultured_bacterium_g__norank_f__Micromonosporaceae	OTU6556	0	0	0	0	0	1	0	0	3	2	1	0	0	0	1	8
d__Bacteria	k__norank_d__Bacteria	p__unclassified_k__norank_d__Bacteria	c__unclassified_k__norank_d__Bacteria	o__unclassified_k__norank_d__Bacteria	f__unclassified_k__norank_d__Bacteria	g__unclassified_k__norank_d__Bacteria	s__unclassified_k__norank_d__Bacteria	OTU5158	2	0	0	1	0	0	0	0	1	0	0	1	0	0	0	5
d__Bacteria	k__norank_d__Bacteria	p__Acidobacteriota	c__Acidobacteriae	o__Acidobacteriales	f__norank_o__Acidobacteriales	g__norank_f__norank_o__Acidobacteriales	s__unclassified_g__norank_f__norank_o__Acidobacteriales	OTU5366	0	0	0	0	5	2	1	0	0	0	0	0	2	4	0	14
d__Bacteria	k__norank_d__Bacteria	p__Acidobacteriota	c__Holophagae	o__Subgroup_7	f__norank_o__Subgroup_7	g__norank_f__norank_o__Subgroup_7	s__uncultured_delta_proteobacterium_g__norank_f__norank_o__Subgroup_7	OTU3157	0	0	0	0	0	0	0	0	0	7	0	0	0	0	0	7
d__Bacteria	k__norank_d__Bacteria	p__Acidobacteriota	c__Acidobacteriae	o__Acidobacteriales	f__norank_o__Acidobacteriales	g__norank_f__norank_o__Acidobacteriales	s__unclassified_g__norank_f__norank_o__Acidobacteriales	OTU169	13	2	38	3	9	2	2	6	0	3	0	3	1	0	2	84
d__Bacteria	k__norank_d__Bacteria	p__Planctomycetota	c__Phycisphaerae	o__Phycisphaerales	f__Phycisphaeraceae	g__SM1A02	s__unclassified_g__SM1A02	OTU3500	0	0	0	0	0	0	0	0	0	0	10	0	0	0	0	10
d__Bacteria	k__norank_d__Bacteria	p__Myxococcota	c__Myxococcia	o__Myxococcales	f__Myxococcaceae	g__norank_f__Myxococcaceae	s__unclassified_g__norank_f__Myxococcaceae	OTU513	0	5	5	0	0	0	0	0	0	6	0	4	0	0	5	25
d__Bacteria	k__norank_d__Bacteria	p__Verrucomicrobiota	c__Chlamydiae	o__Chlamydiales	f__Parachlamydiaceae	g__Candidatus_Protochlamydia	s__metagenome_g__Candidatus_Protochlamydia	OTU2062	0	0	0	1	1	0	5	0	0	0	0	0	0	0	0	7
d__Bacteria	k__norank_d__Bacteria	p__Chloroflexi	c__Anaerolineae	o__SBR1031	f__norank_o__SBR1031	g__norank_f__norank_o__SBR1031	s__uncultured_Gemmatimonadetes_bacterium_g__norank_f__norank	OTU5817	1	0	13	0	0	0	0	0	0	0	0	0	0	0	0	14
d__Bacteria	k__norank_d__Bacteria	p__Acidobacteriota	c__Acidobacteriae	o__Subgroup_13	f__norank_o__Subgroup_13	g__norank_f__norank_o__Subgroup_13	s__unclassified_g__norank_f__norank_o__Subgroup_13	OTU3781	0	3	0	4	5	1	30	11	8	1	9	4	64	0	3	143
d__Bacteria	k__norank_d__Bacteria	p__Firmicutes	c__Bacilli	o__Lactobacillales	f__Streptococcaceae	g__Streptococcus	s__unclassified_g__Streptococcus	OTU5120	0	0	3	0	0	1	1	1	0	0	0	0	0	0	0	6
d__Bacteria	k__norank_d__Bacteria	p__Proteobacteria	c__Gammaproteobacteria	o__unclassified_c__Gammaproteobacteria	f__unclassified_c__Gammaproteobacteria	g__unclassified_c__Gammaproteobacteria	s__unclassified_c__Gammaproteobacteria	OTU1005	0	0	1	56	3	85	54	54	2	0	0	2	2	4	0	263
d__Bacteria	k__norank_d__Bacteria	p__Chloroflexi	c__Ktedonobacteria	o__Ktedonobacterales	f__JG30-KF-AS9	g__norank_f__JG30-KF-AS9	s__uncultured_bacterium_g__norank_f__JG30-KF-AS9	OTU6309	0	0	0	2	4	1	2	0	5	0	0	0	1	0	0	15
d__Bacteria	k__norank_d__Bacteria	p__Acidobacteriota	c__Vicinamibacteria	o__Vicinamibacterales	f__norank_o__Vicinamibacterales	g__norank_f__norank_o__Vicinamibacterales	s__unclassified_g__norank_f__norank_o__Vicinamibacterales	OTU6208	0	0	0	0	1	0	0	0	0	2	0	0	1	2	0	6
d__Bacteria	k__norank_d__Bacteria	p__Dependentiae	c__Babeliae	o__Babeliales	f__Vermiphilaceae	g__norank_f__Vermiphilaceae	s__uncultured_bacterium_g__norank_f__Vermiphilaceae	OTU5400	0	0	0	0	0	0	0	0	0	0	0	0	0	1	0	1
d__Bacteria	k__norank_d__Bacteria	p__Verrucomicrobiota	c__Chlamydiae	o__Chlamydiales	f__cvE6	g__norank_f__cvE6	s__uncultured_bacterium_g__norank_f__cvE6	OTU680	0	0	4	0	0	0	3	1	0	0	0	0	0	0	0	8
d__Bacteria	k__norank_d__Bacteria	p__Myxococcota	c__Myxococcia	o__Myxococcales	f__Myxococcaceae	g__P3OB-42	s__unclassified_g__P3OB-42	OTU1426	0	0	0	0	3	2	2	4	1	1	0	2	3	1	0	19
d__Bacteria	k__norank_d__Bacteria	p__Chloroflexi	c__unclassified_p__Chloroflexi	o__unclassified_p__Chloroflexi	f__unclassified_p__Chloroflexi	g__unclassified_p__Chloroflexi	s__unclassified_p__Chloroflexi	OTU3789	0	0	0	0	0	0	1	0	0	0	0	0	0	0	0	1
d__Bacteria	k__norank_d__Bacteria	p__Myxococcota	c__Myxococcia	o__Myxococcales	f__Myxococcaceae	g__norank_f__Myxococcaceae	s__uncultured_bacterium_g__norank_f__Myxococcaceae	OTU6158	12	8	0	2	7	5	2	1	1	2	2	0	0	3	1	46
d__Bacteria	k__norank_d__Bacteria	p__Myxococcota	c__Polyangia	o__Blfdi19	f__norank_o__Blfdi19	g__norank_f__norank_o__Blfdi19	s__metagenome_g__norank_f__norank_o__Blfdi19	OTU2982	0	0	0	0	0	0	0	0	0	1	0	0	0	0	0	1
d__Bacteria	k__norank_d__Bacteria	p__Verrucomicrobiota	c__Verrucomicrobiae	o__Pedosphaerales	f__Pedosphaeraceae	g__Ellin516	s__uncultured_bacterium_g__Ellin516	OTU5927	3	10	4	3	3	7	4	2	10	0	3	4	2	2	2	59
d__Bacteria	k__norank_d__Bacteria	p__Chloroflexi	c__Ktedonobacteria	o__Ktedonobacterales	f__Ktedonobacteraceae	g__unclassified_f__Ktedonobacteraceae	s__unclassified_f__Ktedonobacteraceae	OTU2093	0	0	1	0	0	0	4	0	0	0	0	1	0	0	0	6
d__Bacteria	k__norank_d__Bacteria	p__Proteobacteria	c__Gammaproteobacteria	o__Diplorickettsiales	f__Diplorickettsiaceae	g__norank_f__Diplorickettsiaceae	s__unclassified_g__norank_f__Diplorickettsiaceae	OTU1229	0	0	0	1	4	0	1	0	0	0	0	0	0	0	0	6
d__Bacteria	k__norank_d__Bacteria	p__Proteobacteria	c__Alphaproteobacteria	o__Rhodospirillales	f__norank_o__Rhodospirillales	g__norank_f__norank_o__Rhodospirillales	s__uncultured_soil_bacterium_g__norank_f__norank_o__Rhodospirillales	OTU3700	0	0	0	0	0	0	0	0	0	0	1	1	1	0	0	3
d__Bacteria	k__norank_d__Bacteria	p__Actinobacteriota	c__Actinobacteria	o__0319-7L14	f__norank_o__0319-7L14	g__norank_f__norank_o__0319-7L14	s__uncultured_bacterium_g__norank_f__norank_o__0319-7L14	OTU1564	4	0	5	6	18	9	95	18	4	0	0	2	20	0	0	181
d__Bacteria	k__norank_d__Bacteria	p__Chloroflexi	c__Ktedonobacteria	o__Ktedonobacterales	f__JG30-KF-AS9	g__norank_f__JG30-KF-AS9	s__unclassified_g__norank_f__JG30-KF-AS9	OTU1927	0	0	0	0	0	0	5	0	0	0	0	0	0	0	0	5
d__Bacteria	k__norank_d__Bacteria	p__Acidobacteriota	c__Vicinamibacteria	o__Vicinamibacterales	f__norank_o__Vicinamibacterales	g__norank_f__norank_o__Vicinamibacterales	s__uncultured_Acidobacteriales_bacterium_g__norank_f__norank_o__Vicinamibacterales	OTU5509	37	8	27	0	10	0	4	5	5	10	55	28	2	7	35	233
d__Bacteria	k__norank_d__Bacteria	p__Bacteroidota	c__Bacteroidia	o__Chitinophagales	f__Chitinophagaceae	g__Puia	s__uncultured_bacterium_g__Puia	OTU380	17	15	9	0	0	11	1	0	5	4	4	0	0	2	0	68
d__Bacteria	k__norank_d__Bacteria	p__Acidobacteriota	c__Acidobacteriae	o__Acidobacteriales	f__Acidobacteriaceae_Subgroup_1	g__Edaphobacter	s__uncultured_Acidobacteria_bacterium_g__Edaphobacter	OTU2553	32	54	50	72	107	66	158	142	121	0	15	61	275	6	1	1160
d__Bacteria	k__norank_d__Bacteria	p__Acidobacteriota	c__Acidobacteriae	o__Bryobacterales	f__Bryobacteraceae	g__Bryobacter	s__metagenome_g__Bryobacter	OTU4108	0	0	0	0	0	0	0	0	0	25	41	30	0	0	0	96
d__Bacteria	k__norank_d__Bacteria	p__Chloroflexi	c__Ktedonobacteria	o__Ktedonobacterales	f__Ktedonobacteraceae	g__1921-2	s__unclassified_g__1921-2	OTU6367	0	0	0	0	0	1	0	0	0	0	0	0	0	0	0	1
d__Bacteria	k__norank_d__Bacteria	p__Chloroflexi	c__AD3	o__norank_c__AD3	f__norank_o__norank_c__AD3	g__norank_f__norank_o__norank_c__AD3	s__uncultured_bacterium_g__norank_f__norank_o__norank_c__AD3	OTU3609	4	0	0	0	3	0	3	2	2	0	3	5	0	0	0	22
d__Bacteria	k__norank_d__Bacteria	p__Myxococcota	c__Myxococcia	o__Myxococcales	f__Myxococcaceae	g__P3OB-42	s__uncultured_bacterium_g__P3OB-42	OTU3087	0	0	0	0	0	0	0	0	0	2	0	0	0	0	0	2
d__Bacteria	k__norank_d__Bacteria	p__Myxococcota	c__Polyangia	o__Polyangiales	f__Polyangiaceae	g__Labilithrix	s__Labilithrix_luteola	OTU6109	1	0	0	1	2	2	0	0	0	0	0	0	0	1	0	7
d__Bacteria	k__norank_d__Bacteria	p__Bacteroidota	c__Bacteroidia	o__Sphingobacteriales	f__AKYH767	g__norank_f__AKYH767	s__uncultured_bacterium_g__norank_f__AKYH767	OTU3167	6	0	0	0	0	0	0	0	0	5	0	0	0	0	0	11
d__Bacteria	k__norank_d__Bacteria	p__Patescibacteria	c__Parcubacteria	o__norank_c__Parcubacteria	f__norank_o__norank_c__Parcubacteria	g__norank_f__norank_o__norank_c__Parcubacteria	s__uncultured_bacterium_g__norank_f__norank_o__norank_c__Parcubacteria	OTU5040	0	0	0	0	0	0	0	0	0	0	0	0	3	0	0	3
d__Bacteria	k__norank_d__Bacteria	p__Firmicutes	c__Clostridia	o__Peptococcales	f__Peptococcaceae	g__Peptococcus	s__unclassified_g__Peptococcus	OTU3469	0	0	0	0	0	0	0	0	0	0	3	0	0	0	0	3
d__Bacteria	k__norank_d__Bacteria	p__Dependentiae	c__Babeliae	o__Babeliales	f__norank_o__Babeliales	g__norank_f__norank_o__Babeliales	s__uncultured_bacterium_g__norank_f__norank_o__Babeliales	OTU3358	0	0	0	0	0	0	0	0	0	0	3	0	0	0	0	3
d__Bacteria	k__norank_d__Bacteria	p__Firmicutes	c__Clostridia	o__norank_c__Clostridia	f__Hungateiclostridiaceae	g__norank_f__Hungateiclostridiaceae	s__unclassified_g__norank_f__Hungateiclostridiaceae	OTU4916	0	0	0	0	0	0	0	0	0	0	0	0	3	0	0	3
d__Bacteria	k__norank_d__Bacteria	p__Chloroflexi	c__Anaerolineae	o__Caldilineales	f__Caldilineaceae	g__norank_f__Caldilineaceae	s__uncultured_bacterium_g__norank_f__Caldilineaceae	OTU2993	5	0	0	0	2	0	0	0	0	2	0	0	0	0	5	14
d__Bacteria	k__norank_d__Bacteria	p__Actinobacteriota	c__Actinobacteria	o__PeM15	f__norank_o__PeM15	g__norank_f__norank_o__PeM15	s__metagenome_g__norank_f__norank_o__PeM15	OTU6135	0	0	0	0	0	0	0	0	0	2	0	0	0	0	1	3
d__Bacteria	k__norank_d__Bacteria	p__Verrucomicrobiota	c__Verrucomicrobiae	o__Chthoniobacterales	f__Chthoniobacteraceae	g__Chthoniobacter	s__uncultured_bacterium_g__Chthoniobacter	OTU6410	2	0	12	0	0	0	3	0	1	0	1	1	1	1	0	22
d__Bacteria	k__norank_d__Bacteria	p__Actinobacteriota	c__Acidimicrobiia	o__Microtrichales	f__Iamiaceae	g__Iamia	s__metagenome_g__Iamia	OTU1186	2	0	0	0	4	0	0	0	0	0	0	0	0	0	0	6
d__Bacteria	k__norank_d__Bacteria	p__Bacteroidota	c__Bacteroidia	o__Flavobacteriales	f__unclassified_o__Flavobacteriales	g__unclassified_o__Flavobacteriales	s__unclassified_o__Flavobacteriales	OTU6242	0	0	0	0	0	0	0	0	0	1	0	0	0	0	0	1
d__Bacteria	k__norank_d__Bacteria	p__Bacteroidota	c__Bacteroidia	o__Chitinophagales	f__Chitinophagaceae	g__Taibaiella	s__uncultured_bacterium_g__Taibaiella	OTU1658	2	1	14	0	2	0	0	0	0	0	0	0	0	1	0	20
d__Bacteria	k__norank_d__Bacteria	p__Chloroflexi	c__Anaerolineae	o__SBR1031	f__norank_o__SBR1031	g__norank_f__norank_o__SBR1031	s__unclassified_g__norank_f__norank_o__SBR1031	OTU3631	0	0	2	0	2	5	1	0	0	0	0	4	0	0	0	14
d__Bacteria	k__norank_d__Bacteria	p__Verrucomicrobiota	c__Verrucomicrobiae	o__Chthoniobacterales	f__Xiphinematobacteraceae	g__Candidatus_Xiphinematobacter	s__metagenome_g__Candidatus_Xiphinematobacter	OTU400	0	0	5	0	0	0	0	0	0	0	0	0	0	0	0	5
d__Bacteria	k__norank_d__Bacteria	p__Acidobacteriota	c__Blastocatellia	o__Blastocatellales	f__Blastocatellaceae	g__norank_f__Blastocatellaceae	s__unclassified_g__norank_f__Blastocatellaceae	OTU71	20	5	10	0	4	0	4	1	0	18	7	12	8	1	21	111
d__Bacteria	k__norank_d__Bacteria	p__Armatimonadota	c__Fimbriimonadia	o__Fimbriimonadales	f__Fimbriimonadaceae	g__norank_f__Fimbriimonadaceae	s__unclassified_g__norank_f__Fimbriimonadaceae	OTU1064	0	0	1	4	7	2	11	1	8	0	0	1	1	0	1	37
d__Bacteria	k__norank_d__Bacteria	p__Acidobacteriota	c__Vicinamibacteria	o__Vicinamibacterales	f__norank_o__Vicinamibacterales	g__norank_f__norank_o__Vicinamibacterales	s__uncultured_Acidobacteria_bacterium_g__norank_f__norank_o__Vicinamibacterales	OTU4127	0	1	0	0	0	0	0	0	0	15	27	0	0	0	1	44
d__Bacteria	k__norank_d__Bacteria	p__Actinobacteriota	c__Actinobacteria	o__Micrococcales	f__Microbacteriaceae	g__unclassified_f__Microbacteriaceae	s__unclassified_f__Microbacteriaceae	OTU1714	0	1	1	2	0	0	0	3	0	7	9	0	0	1	8	32
d__Bacteria	k__norank_d__Bacteria	p__Bdellovibrionota	c__Oligoflexia	o__0319-6G20	f__norank_o__0319-6G20	g__norank_f__norank_o__0319-6G20	s__unclassified_g__norank_f__norank_o__0319-6G20	OTU3777	0	0	0	0	0	0	1	1	3	0	0	0	2	0	0	7
d__Bacteria	k__norank_d__Bacteria	p__Proteobacteria	c__Alphaproteobacteria	o__norank_c__Alphaproteobacteria	f__norank_o__norank_c__Alphaproteobacteria	g__norank_f__norank_o__norank_c__Alphaproteobacteria	s__uncultured_bacterium_g__norank_f__norank_o__norank_c__Alphaproteobacteria	OTU5324	0	0	0	0	0	0	0	0	0	2	0	0	0	4	3	9
d__Bacteria	k__norank_d__Bacteria	p__Acidobacteriota	c__Acidobacteriae	o__Acidobacteriales	f__norank_o__Acidobacteriales	g__norank_f__norank_o__Acidobacteriales	s__uncultured_Acidobacteria_bacterium_g__norank_f__norank_o__Acidobacteriales	OTU1220	1	2	0	0	14	1	0	0	11	1	14	4	0	27	0	75
d__Bacteria	k__norank_d__Bacteria	p__Verrucomicrobiota	c__Verrucomicrobiae	o__Pedosphaerales	f__Pedosphaeraceae	g__norank_f__Pedosphaeraceae	s__uncultured_bacterium_g__norank_f__Pedosphaeraceae	OTU3377	11	5	13	19	5	6	3	10	63	2	8	12	8	5	1	171
d__Bacteria	k__norank_d__Bacteria	p__Acidobacteriota	c__Acidobacteriae	o__Acidobacteriales	f__Koribacteraceae	g__Candidatus_Koribacter	s__uncultured_bacterium_g__Candidatus_Koribacter	OTU4896	27	22	44	73	107	63	31	41	121	5	4	9	44	14	4	609
d__Bacteria	k__norank_d__Bacteria	p__Acidobacteriota	c__Acidobacteriae	o__Subgroup_2	f__norank_o__Subgroup_2	g__norank_f__norank_o__Subgroup_2	s__uncultured_forest_soil_bacterium_g__norank_f__norank_o__Subgroup_2	OTU1869	8	2	4	3	32	14	401	15	44	0	3	5	27	0	1	559
d__Bacteria	k__norank_d__Bacteria	p__Proteobacteria	c__Alphaproteobacteria	o__Caulobacterales	f__Caulobacteraceae	g__norank_f__Caulobacteraceae	s__uncultured_Caulobacteraceae_bacterium_g__norank	OTU4861	10	28	6	6	15	27	26	12	42	6	11	25	8	21	3	246
d__Bacteria	k__norank_d__Bacteria	p__Proteobacteria	c__Alphaproteobacteria	o__Rhizobiales	f__Beijerinckiaceae	g__Bosea	s__uncultured_bacterium_g__Bosea	OTU5841	4	11	23	1	1	2	0	1	8	11	9	1	1	3	7	83
d__Bacteria	k__norank_d__Bacteria	p__Proteobacteria	c__Gammaproteobacteria	o__unclassified_c__Gammaproteobacteria	f__unclassified_c__Gammaproteobacteria	g__unclassified_c__Gammaproteobacteria	s__unclassified_c__Gammaproteobacteria	OTU2264	0	0	0	4	0	0	1	0	4	0	0	0	0	0	0	9
d__Bacteria	k__norank_d__Bacteria	p__Proteobacteria	c__Alphaproteobacteria	o__Tistrellales	f__Geminicoccaceae	g__Candidatus_Alysiosphaera	s__metagenome_g__Candidatus_Alysiosphaera	OTU5668	0	0	0	0	0	0	0	0	0	4	0	0	0	0	1	5
d__Bacteria	k__norank_d__Bacteria	p__Proteobacteria	c__Gammaproteobacteria	o__Xanthomonadales	f__Xanthomonadaceae	g__Stenotrophomonas	s__uncultured_organism_g__Stenotrophomonas	OTU1785	0	0	0	3	2	1	0	0	0	5	0	0	0	0	5	16
d__Bacteria	k__norank_d__Bacteria	p__Proteobacteria	c__Alphaproteobacteria	o__Rhizobiales	f__Beijerinckiaceae	g__Roseiarcus	s__uncultured_bacterium_g__Roseiarcus	OTU1135	79	130	54	210	192	234	204	230	249	6	17	37	64	43	14	1763
d__Bacteria	k__norank_d__Bacteria	p__unclassified_k__norank_d__Bacteria	c__unclassified_k__norank_d__Bacteria	o__unclassified_k__norank_d__Bacteria	f__unclassified_k__norank_d__Bacteria	g__unclassified_k__norank_d__Bacteria	s__unclassified_k__norank_d__Bacteria	OTU1925	0	0	0	0	0	0	2	0	0	0	0	0	0	0	0	2
d__Bacteria	k__norank_d__Bacteria	p__unclassified_k__norank_d__Bacteria	c__unclassified_k__norank_d__Bacteria	o__unclassified_k__norank_d__Bacteria	f__unclassified_k__norank_d__Bacteria	g__unclassified_k__norank_d__Bacteria	s__unclassified_k__norank_d__Bacteria	OTU4202	0	0	0	0	0	0	0	0	0	0	2	0	0	0	0	2
d__Bacteria	k__norank_d__Bacteria	p__Bacteroidota	c__Bacteroidia	o__Chitinophagales	f__Chitinophagaceae	g__Puia	s__metagenome_g__Puia	OTU1527	32	83	31	14	22	38	17	12	19	1	16	26	19	3	17	350
d__Bacteria	k__norank_d__Bacteria	p__Proteobacteria	c__Gammaproteobacteria	o__Burkholderiales	f__Nitrosomonadaceae	g__MND1	s__unclassified_g__MND1	OTU3109	0	0	0	0	0	1	0	0	0	3	0	2	0	0	1	7
d__Bacteria	k__norank_d__Bacteria	p__Chloroflexi	c__Ktedonobacteria	o__Ktedonobacterales	f__Ktedonobacteraceae	g__norank_f__Ktedonobacteraceae	s__unclassified_g__norank_f__Ktedonobacteraceae	OTU5082	0	0	0	5	0	0	0	1	4	0	0	0	3	0	0	13
d__Bacteria	k__norank_d__Bacteria	p__Chloroflexi	c__JG30-KF-CM66	o__norank_c__JG30-KF-CM66	f__norank_o__norank_c__JG30-KF-CM66	g__norank_f__norank_o__norank_c__JG30-KF-CM66	s__unclassified_g__norank_f__norank_o__norank_c__JG30-KF-CM66	OTU2180	1	4	0	2	9	10	10	1	3	1	0	2	1	4	0	48
d__Bacteria	k__norank_d__Bacteria	p__Bdellovibrionota	c__Oligoflexia	o__0319-6G20	f__norank_o__0319-6G20	g__norank_f__norank_o__0319-6G20	s__unclassified_g__norank_f__norank_o__0319-6G20	OTU5225	0	0	0	0	0	0	0	0	0	0	0	0	0	2	0	2
d__Bacteria	k__norank_d__Bacteria	p__Bdellovibrionota	c__Oligoflexia	o__0319-6G20	f__norank_o__0319-6G20	g__norank_f__norank_o__0319-6G20	s__unclassified_g__norank_f__norank_o__0319-6G20	OTU5221	0	0	0	0	0	0	0	0	0	0	0	0	0	2	0	2
d__Bacteria	k__norank_d__Bacteria	p__Chloroflexi	c__Dehalococcoidia	o__S085	f__norank_o__S085	g__norank_f__norank_o__S085	s__metagenome_g__norank_f__norank_o__S085	OTU3490	0	0	1	0	0	1	0	0	0	0	2	0	0	0	0	4
d__Bacteria	k__norank_d__Bacteria	p__Proteobacteria	c__Gammaproteobacteria	o__Xanthomonadales	f__Xanthomonadaceae	g__Stenotrophomonas	s__unclassified_g__Stenotrophomonas	OTU1661	0	28	0	2	0	0	0	0	0	4	0	0	0	5	1	40
d__Bacteria	k__norank_d__Bacteria	p__Firmicutes	c__Bacilli	o__Erysipelotrichales	f__Erysipelotrichaceae	g__ZOR0006	s__uncultured_organism_g__ZOR0006	OTU2574	0	0	0	0	0	0	0	2	0	0	0	0	1	0	0	3
d__Bacteria	k__norank_d__Bacteria	p__Chloroflexi	c__Ktedonobacteria	o__Ktedonobacterales	f__Ktedonobacteraceae	g__unclassified_f__Ktedonobacteraceae	s__unclassified_f__Ktedonobacteraceae	OTU5389	0	0	0	0	0	0	0	0	0	0	0	3	0	2	0	5
d__Bacteria	k__norank_d__Bacteria	p__Proteobacteria	c__Gammaproteobacteria	o__Burkholderiales	f__Nitrosomonadaceae	g__Nitrosomonas	s__bacterium_enrichment_culture_clone_SRAO_14	OTU2907	0	0	0	0	0	0	0	0	0	2	0	0	0	0	0	2
d__Bacteria	k__norank_d__Bacteria	p__Bdellovibrionota	c__Bdellovibrionia	o__Bdellovibrionales	f__Bdellovibrionaceae	g__Bdellovibrio	s__uncultured_bacterium_g__Bdellovibrio	OTU4902	0	0	0	0	3	1	0	0	2	0	0	0	7	0	0	13
d__Bacteria	k__norank_d__Bacteria	p__Acidobacteriota	c__Acidobacteriae	o__Acidobacteriales	f__norank_o__Acidobacteriales	g__norank_f__norank_o__Acidobacteriales	s__uncultured_bacterium_g__norank_f__norank_o__Acidobacteriales	OTU168	51	96	16	78	78	68	40	46	238	2	45	29	35	90	16	928
d__Bacteria	k__norank_d__Bacteria	p__Proteobacteria	c__Alphaproteobacteria	o__unclassified_c__Alphaproteobacteria	f__unclassified_c__Alphaproteobacteria	g__unclassified_c__Alphaproteobacteria	s__unclassified_c__Alphaproteobacteria	OTU5276	0	0	0	0	0	0	0	0	0	8	0	0	0	3	0	11
d__Bacteria	k__norank_d__Bacteria	p__Proteobacteria	c__Gammaproteobacteria	o__Burkholderiales	f__Comamonadaceae	g__unclassified_f__Comamonadaceae	s__unclassified_f__Comamonadaceae	OTU6088	0	0	0	0	0	0	0	0	0	0	0	3	1	0	0	4
d__Bacteria	k__norank_d__Bacteria	p__Bdellovibrionota	c__Bdellovibrionia	o__Bdellovibrionales	f__Bdellovibrionaceae	g__Bdellovibrio	s__uncultured_deep-sea_bacterium_g__Bdellovibrio	OTU6359	0	0	2	0	0	0	0	0	1	0	0	0	0	0	0	3
d__Bacteria	k__norank_d__Bacteria	p__Planctomycetota	c__Planctomycetes	o__Gemmatales	f__Gemmataceae	g__norank_f__Gemmataceae	s__uncultured_bacterium_g__norank_f__Gemmataceae	OTU4151	0	0	0	0	1	0	0	0	0	0	1	0	0	0	0	2
d__Bacteria	k__norank_d__Bacteria	p__Acidobacteriota	c__Holophagae	o__Holophagales	f__Holophagaceae	g__Geothrix	s__unclassified_g__Geothrix	OTU4425	0	0	2	0	0	0	0	0	0	0	0	0	0	0	0	2
d__Bacteria	k__norank_d__Bacteria	p__Patescibacteria	c__Saccharimonadia	o__Saccharimonadales	f__norank_o__Saccharimonadales	g__norank_f__norank_o__Saccharimonadales	s__uncultured_bacterium_g__norank_f__norank_o__Saccharimonadales	OTU558	0	0	3	0	0	0	0	0	0	0	0	0	0	0	0	3
d__Bacteria	k__norank_d__Bacteria	p__Bacteroidota	c__Bacteroidia	o__Cytophagales	f__Microscillaceae	g__norank_f__Microscillaceae	s__metagenome_g__norank_f__Microscillaceae	OTU6502	1	0	2	0	0	0	0	0	0	6	2	0	0	0	9	20
d__Bacteria	k__norank_d__Bacteria	p__Proteobacteria	c__Gammaproteobacteria	o__Diplorickettsiales	f__Diplorickettsiaceae	g__Aquicella	s__uncultured_bacterium_g__Aquicella	OTU4097	0	1	0	0	0	0	0	0	1	0	0	0	0	0	0	2
d__Bacteria	k__norank_d__Bacteria	p__Gemmatimonadota	c__Gemmatimonadetes	o__Gemmatimonadales	f__Gemmatimonadaceae	g__norank_f__Gemmatimonadaceae	s__Gemmatimonadetes_bacterium_WY71	OTU5708	2	0	1	0	0	0	0	0	1	12	0	4	1	1	1	23
d__Bacteria	k__norank_d__Bacteria	p__Chloroflexi	c__Anaerolineae	o__SBR1031	f__A4b	g__norank_f__A4b	s__uncultured_soil_bacterium_g__norank_f__A4b	OTU6539	28	3	22	0	1	0	1	0	0	27	23	2	2	11	13	133
d__Bacteria	k__norank_d__Bacteria	p__Proteobacteria	c__Gammaproteobacteria	o__Diplorickettsiales	f__Diplorickettsiaceae	g__Aquicella	s__uncultured_bacterium_g__Aquicella	OTU1253	0	0	0	0	3	0	0	0	0	0	0	0	0	0	0	3
d__Bacteria	k__norank_d__Bacteria	p__Verrucomicrobiota	c__Chlamydiae	o__Chlamydiales	f__Simkaniaceae	g__norank_f__Simkaniaceae	s__unclassified_g__norank_f__Simkaniaceae	OTU1439	0	0	0	0	0	1	2	1	1	0	0	0	0	0	0	5
d__Bacteria	k__norank_d__Bacteria	p__Proteobacteria	c__Gammaproteobacteria	o__Pseudomonadales	f__Moraxellaceae	g__Acinetobacter	s__Acinetobacter_johnsonii	OTU477	1	6	29	3	17	1	1	0	2	0	1	0	3	1	1	66
d__Bacteria	k__norank_d__Bacteria	p__Bdellovibrionota	c__Oligoflexia	o__0319-6G20	f__norank_o__0319-6G20	g__norank_f__norank_o__0319-6G20	s__bacterium_enrichment_culture_clone_auto112_4W	OTU1195	0	0	0	2	1	1	0	0	0	0	2	0	0	0	0	6
d__Bacteria	k__norank_d__Bacteria	p__Actinobacteriota	c__Actinobacteria	o__Propionibacteriales	f__Nocardioidaceae	g__Nocardioides	s__unclassified_g__Nocardioides	OTU524	1	1	3	0	1	0	0	0	0	0	0	0	0	0	0	6
d__Bacteria	k__norank_d__Bacteria	p__Proteobacteria	c__Alphaproteobacteria	o__Elsterales	f__norank_o__Elsterales	g__norank_f__norank_o__Elsterales	s__unclassified_g__norank_f__norank_o__Elsterales	OTU6529	0	0	0	0	0	2	0	2	1	0	0	0	0	0	0	5
d__Bacteria	k__norank_d__Bacteria	p__Chloroflexi	c__unclassified_p__Chloroflexi	o__unclassified_p__Chloroflexi	f__unclassified_p__Chloroflexi	g__unclassified_p__Chloroflexi	s__unclassified_p__Chloroflexi	OTU301	0	1	0	0	0	0	0	0	1	0	0	0	1	0	0	3
d__Bacteria	k__norank_d__Bacteria	p__Dependentiae	c__Babeliae	o__Babeliales	f__Vermiphilaceae	g__norank_f__Vermiphilaceae	s__uncultured_bacterium_g__norank_f__Vermiphilaceae	OTU1891	0	0	0	0	0	1	1	0	0	0	4	0	0	0	0	6
d__Bacteria	k__norank_d__Bacteria	p__Actinobacteriota	c__Actinobacteria	o__Frankiales	f__Frankiaceae	g__Jatrophihabitans	s__Jatrophihabitans_sp.	OTU4557	6	6	7	7	2	10	6	8	3	4	2	9	26	5	6	107
d__Bacteria	k__norank_d__Bacteria	p__Actinobacteriota	c__Actinobacteria	o__Micrococcales	f__Micrococcaceae	g__Arthrobacter	s__Arthrobacter_crystallopoietes	OTU3483	0	0	0	0	3	0	1	0	0	1	22	2	1	1	11	42
d__Bacteria	k__norank_d__Bacteria	p__Firmicutes	c__Bacilli	o__Bacillales	f__Bacillaceae	g__Bacillus	s__Bacillus_firmus_g__Bacillus	OTU4911	0	10	8	5	1	9	6	13	7	12	8	18	17	5	33	152
d__Bacteria	k__norank_d__Bacteria	p__Myxococcota	c__Polyangia	o__unclassified_c__Polyangia	f__unclassified_c__Polyangia	g__unclassified_c__Polyangia	s__unclassified_c__Polyangia	OTU6441	0	0	0	0	0	0	0	0	0	0	0	0	0	0	2	2
d__Bacteria	k__norank_d__Bacteria	p__Patescibacteria	c__Saccharimonadia	o__Saccharimonadales	f__unclassified_o__Saccharimonadales	g__unclassified_o__Saccharimonadales	s__unclassified_o__Saccharimonadales	OTU1609	0	0	0	0	0	0	12	0	0	0	0	0	0	0	0	12
d__Bacteria	k__norank_d__Bacteria	p__Chloroflexi	c__Ktedonobacteria	o__Ktedonobacterales	f__Ktedonobacteraceae	g__HSB_OF53-F07	s__uncultured_bacterium_g__HSB_OF53-F07	OTU938	0	0	0	8	0	0	0	0	0	0	0	0	0	0	0	8
d__Bacteria	k__norank_d__Bacteria	p__Actinobacteriota	c__Thermoleophilia	o__Gaiellales	f__Gaiellaceae	g__Gaiella	s__uncultured_bacterium_g__Gaiella	OTU3123	11	0	0	0	1	0	0	0	0	11	1	0	0	2	6	32
d__Bacteria	k__norank_d__Bacteria	p__Bacteroidota	c__Bacteroidia	o__Bacteroidetes_VC2.1_Bac22	f__norank_o__Bacteroidetes_VC2.1_Bac22	g__norank_f__norank_o__Bacteroidetes_VC2.1_Bac22	s__metagenome_g__norank_f__norank_o__Bacteroidetes_VC2.1_Bac22	OTU405	0	0	8	0	0	0	0	0	0	0	0	0	0	0	0	8
d__Bacteria	k__norank_d__Bacteria	p__Proteobacteria	c__Gammaproteobacteria	o__Burkholderiales	f__Burkholderiaceae	g__Burkholderia-Caballeronia-Paraburkholderia	s__unclassified_g__Burkholderia-Caballeronia-Paraburkholderia	OTU1395	1	15	0	303	45	1055	23	21	19	3	11	2	7	52	6	1563
d__Bacteria	k__norank_d__Bacteria	p__Cyanobacteria	c__Cyanobacteriia	o__Cyanobacteriales	f__unclassified_o__Cyanobacteriales	g__unclassified_o__Cyanobacteriales	s__unclassified_o__Cyanobacteriales	OTU399	0	1	8	0	0	0	0	0	0	0	0	0	0	0	0	9
d__Bacteria	k__norank_d__Bacteria	p__Verrucomicrobiota	c__Verrucomicrobiae	o__Pedosphaerales	f__Pedosphaeraceae	g__norank_f__Pedosphaeraceae	s__unclassified_g__norank_f__Pedosphaeraceae	OTU6305	32	30	128	2	22	22	85	15	42	0	14	44	12	22	19	489
d__Bacteria	k__norank_d__Bacteria	p__Actinobacteriota	c__Thermoleophilia	o__Gaiellales	f__norank_o__Gaiellales	g__norank_f__norank_o__Gaiellales	s__unclassified_g__norank_f__norank_o__Gaiellales	OTU2945	13	9	9	1	9	2	3	7	2	40	8	8	5	26	1	143
d__Bacteria	k__norank_d__Bacteria	p__Actinobacteriota	c__Actinobacteria	o__Frankiales	f__Acidothermaceae	g__Acidothermus	s__uncultured_actinobacterium_g__Acidothermus	OTU6386	24	63	26	32	115	162	291	130	114	2	9	7	108	20	15	1118
d__Bacteria	k__norank_d__Bacteria	p__Acidobacteriota	c__Acidobacteriae	o__Subgroup_15	f__norank_o__Subgroup_15	g__norank_f__norank_o__Subgroup_15	s__unclassified_g__norank_f__norank_o__Subgroup_15	OTU3549	2	0	11	0	0	0	0	0	0	5	13	0	0	0	0	31
d__Bacteria	k__norank_d__Bacteria	p__Actinobacteriota	c__Acidimicrobiia	o__norank_c__Acidimicrobiia	f__norank_o__norank_c__Acidimicrobiia	g__norank_f__norank_o__norank_c__Acidimicrobiia	s__uncultured_bacterium_g__norank_f__norank_o__norank_c__Acidimicrobiia	OTU1037	2	5	3	10	29	27	13	30	32	7	11	74	29	5	1	278
d__Bacteria	k__norank_d__Bacteria	p__Proteobacteria	c__Alphaproteobacteria	o__Rhodobacterales	f__Rhodobacteraceae	g__Amaricoccus	s__uncultured_bacterium_g__Amaricoccus	OTU3142	0	0	0	0	0	0	0	0	0	2	0	0	0	0	0	2
d__Bacteria	k__norank_d__Bacteria	p__Acidobacteriota	c__Vicinamibacteria	o__Vicinamibacterales	f__norank_o__Vicinamibacterales	g__norank_f__norank_o__Vicinamibacterales	s__uncultured_Acidobacteriaceae_bacterium_g__norank_f__norank_o__Vicinamibacterales	OTU4664	0	0	3	0	0	0	0	1	0	0	2	0	0	0	0	6
d__Bacteria	k__norank_d__Bacteria	p__WPS-2	c__norank_p__WPS-2	o__norank_c__norank_p__WPS-2	f__norank_o__norank_c__norank_p__WPS-2	g__norank_f__norank_o__norank_c__norank_p__WPS-2	s__metagenome_g__norank_f__norank_o__norank_c__norank_p__WPS-2	OTU587	0	0	5	0	0	0	0	0	0	0	0	0	0	0	0	5
d__Bacteria	k__norank_d__Bacteria	p__Actinobacteriota	c__Actinobacteria	o__Propionibacteriales	f__Propionibacteriaceae	g__Friedmanniella	s__Friedmanniella_endophytica	OTU218	0	3	1	0	0	0	0	1	0	0	0	0	2	0	0	7
d__Bacteria	k__norank_d__Bacteria	p__Proteobacteria	c__Gammaproteobacteria	o__unclassified_c__Gammaproteobacteria	f__unclassified_c__Gammaproteobacteria	g__unclassified_c__Gammaproteobacteria	s__unclassified_c__Gammaproteobacteria	OTU2382	0	0	0	0	0	0	0	0	3	0	0	0	0	0	0	3
d__Bacteria	k__norank_d__Bacteria	p__Proteobacteria	c__Gammaproteobacteria	o__unclassified_c__Gammaproteobacteria	f__unclassified_c__Gammaproteobacteria	g__unclassified_c__Gammaproteobacteria	s__unclassified_c__Gammaproteobacteria	OTU2387	0	1	0	0	1	2	0	1	1	0	0	0	1	0	0	7
d__Bacteria	k__norank_d__Bacteria	p__Myxococcota	c__Polyangia	o__Haliangiales	f__Haliangiaceae	g__Haliangium	s__unclassified_g__Haliangium	OTU479	10	6	6	2	0	8	4	1	8	12	16	19	3	7	2	104
d__Bacteria	k__norank_d__Bacteria	p__Planctomycetota	c__Phycisphaerae	o__Phycisphaerales	f__Phycisphaeraceae	g__SM1A02	s__uncultured_bacterium_g__SM1A02	OTU2	1	0	1	0	0	0	0	0	0	0	0	0	0	0	0	2
d__Bacteria	k__norank_d__Bacteria	p__Dependentiae	c__Babeliae	o__Babeliales	f__Vermiphilaceae	g__norank_f__Vermiphilaceae	s__uncultured_bacterium_g__norank_f__Vermiphilaceae	OTU2320	0	1	0	0	41	0	1	4	0	0	0	0	0	0	0	47
d__Bacteria	k__norank_d__Bacteria	p__Chloroflexi	c__Ktedonobacteria	o__Ktedonobacterales	f__Ktedonobacteraceae	g__HSB_OF53-F07	s__uncultured_bacterium_g__HSB_OF53-F07	OTU1071	2	0	1	1	0	2	4	0	0	0	0	0	1	0	0	11
d__Bacteria	k__norank_d__Bacteria	p__Gemmatimonadota	c__Gemmatimonadetes	o__Gemmatimonadales	f__Gemmatimonadaceae	g__norank_f__Gemmatimonadaceae	s__uncultured_Gemmatimonadales_bacterium_g__norank_f__Gemmatimonadaceae	OTU1225	0	0	0	0	2	0	0	0	1	2	0	0	0	4	3	12
d__Bacteria	k__norank_d__Bacteria	p__Acidobacteriota	c__Acidobacteriae	o__Subgroup_2	f__norank_o__Subgroup_2	g__norank_f__norank_o__Subgroup_2	s__uncultured_forest_soil_bacterium_g__norank_f__norank_o__Subgroup_2	OTU1316	1	11	0	13	21	7	7	3	30	2	10	1	3	3	0	112
d__Bacteria	k__norank_d__Bacteria	p__Acidobacteriota	c__Acidobacteriae	o__Acidobacteriales	f__Acidobacteriaceae_Subgroup_1	g__unclassified_f__Acidobacteriaceae_Subgroup_1	s__unclassified_f__Acidobacteriaceae_Subgroup_1	OTU4894	425	515	725	391	397	620	1166	425	965	32	101	795	652	82	224	7515
d__Bacteria	k__norank_d__Bacteria	p__Verrucomicrobiota	c__Verrucomicrobiae	o__Chthoniobacterales	f__Chthoniobacteraceae	g__Chthoniobacter	s__uncultured_bacterium_g__Chthoniobacter	OTU1444	1	1	6	0	2	4	3	1	0	0	0	1	0	0	0	19
d__Bacteria	k__norank_d__Bacteria	p__Proteobacteria	c__Gammaproteobacteria	o__Burkholderiales	f__Chromobacteriaceae	g__unclassified_f__Chromobacteriaceae	s__unclassified_f__Chromobacteriaceae	OTU448	1	14	27	4	3	11	0	0	0	9	6	4	0	1	0	80
d__Bacteria	k__norank_d__Bacteria	p__Hydrogenedentes	c__Hydrogenedentia	o__Hydrogenedentiales	f__Hydrogenedensaceae	g__norank_f__Hydrogenedensaceae	s__uncultured_bacterium_g__norank_f__Hydrogenedensaceae	OTU3098	0	0	0	0	0	0	0	0	0	1	0	0	0	0	1	2
d__Bacteria	k__norank_d__Bacteria	p__Dependentiae	c__Babeliae	o__Babeliales	f__Vermiphilaceae	g__norank_f__Vermiphilaceae	s__unclassified_g__norank_f__Vermiphilaceae	OTU5038	0	32	0	0	0	0	0	5	0	0	1	0	1	0	1	40
d__Bacteria	k__norank_d__Bacteria	p__Patescibacteria	c__Gracilibacteria	o__Candidatus_Peregrinibacteria	f__norank_o__Candidatus_Peregrinibacteria	g__norank_f__norank_o__Candidatus_Peregrinibacteria	s__uncultured_bacterium_g__norank_f__norank_o__Candidatus_Peregrinibacteria	OTU1556	0	0	0	0	0	14	0	0	0	0	0	0	0	0	0	14
d__Bacteria	k__norank_d__Bacteria	p__Myxococcota	c__Myxococcia	o__Myxococcales	f__Myxococcaceae	g__P3OB-42	s__uncultured_bacterium_g__P3OB-42	OTU5267	0	0	0	0	0	0	0	0	0	5	1	0	0	2	1	9
d__Bacteria	k__norank_d__Bacteria	p__Planctomycetota	c__Planctomycetes	o__Gemmatales	f__Gemmataceae	g__norank_f__Gemmataceae	s__unclassified_g__norank_f__Gemmataceae	OTU2357	0	0	0	1	0	0	0	0	0	0	0	0	0	0	0	1
d__Bacteria	k__norank_d__Bacteria	p__Bdellovibrionota	c__Bdellovibrionia	o__Bdellovibrionales	f__Bdellovibrionaceae	g__Bdellovibrio	s__metagenome_g__Bdellovibrio	OTU2976	0	0	0	0	0	0	0	0	0	2	0	0	0	0	0	2
d__Bacteria	k__norank_d__Bacteria	p__Myxococcota	c__Myxococcia	o__Myxococcales	f__Myxococcaceae	g__norank_f__Myxococcaceae	s__uncultured_delta_proteobacterium_g__norank_f__Myxococcaceae	OTU4001	0	0	0	0	0	0	0	0	0	1	0	0	0	0	0	1
d__Bacteria	k__norank_d__Bacteria	p__Chloroflexi	c__Ktedonobacteria	o__Ktedonobacterales	f__JG30-KF-AS9	g__norank_f__JG30-KF-AS9	s__unclassified_g__norank_f__JG30-KF-AS9	OTU4319	0	1	0	0	0	0	0	0	0	0	7	0	0	0	0	8
d__Bacteria	k__norank_d__Bacteria	p__Firmicutes	c__Bacilli	o__Thermoactinomycetales	f__Thermoactinomycetaceae	g__Pasteuria	s__uncultured_bacterium_g__Pasteuria	OTU879	0	0	0	0	0	0	0	0	0	0	0	1	0	0	0	1
d__Bacteria	k__norank_d__Bacteria	p__Firmicutes	c__Bacilli	o__Alicyclobacillales	f__Alicyclobacillaceae	g__Alicyclobacillus	s__Alicyclobacillus_acidoterrestris	OTU1604	0	0	0	0	0	0	0	2	0	0	0	0	0	0	0	2
d__Bacteria	k__norank_d__Bacteria	p__Bacteroidota	c__Bacteroidia	o__Chitinophagales	f__norank_o__Chitinophagales	g__norank_f__norank_o__Chitinophagales	s__uncultured_delta_proteobacterium_g__norank_f__norank_o__Chitinophagales	OTU4090	1	0	0	1	0	0	0	0	0	0	0	0	0	0	0	2
d__Bacteria	k__norank_d__Bacteria	p__Proteobacteria	c__Gammaproteobacteria	o__Pseudomonadales	f__Moraxellaceae	g__norank_f__Moraxellaceae	s__unclassified_g__norank_f__Moraxellaceae	OTU5327	0	0	0	0	2	0	0	0	0	12	10	21	10	16	115	186
d__Bacteria	k__norank_d__Bacteria	p__Firmicutes	c__Bacilli	o__Paenibacillales	f__Paenibacillaceae	g__Paenibacillus	s__Paenibacillus_kribbensis	OTU5529	0	0	0	3	0	1	0	1	1	0	0	0	2	1	3	12
d__Bacteria	k__norank_d__Bacteria	p__Bacteroidota	c__Bacteroidia	o__Cytophagales	f__Microscillaceae	g__norank_f__Microscillaceae	s__uncultured_soil_bacterium_g__norank_f__Microscillaceae	OTU2376	0	0	4	0	0	0	0	0	0	2	0	0	0	0	0	6
d__Bacteria	k__norank_d__Bacteria	p__Armatimonadota	c__Chthonomonadetes	o__Chthonomonadales	f__Chthonomonadaceae	g__Chthonomonas	s__uncultured_bacterium_g__Chthonomonas	OTU5990	0	0	1	0	0	0	0	0	0	1	1	0	0	1	0	4
d__Bacteria	k__norank_d__Bacteria	p__Actinobacteriota	c__Actinobacteria	o__Streptosporangiales	f__Thermomonosporaceae	g__unclassified_f__Thermomonosporaceae	s__unclassified_f__Thermomonosporaceae	OTU6301	0	0	1	0	0	0	0	0	0	3	0	4	1	0	1	10
d__Bacteria	k__norank_d__Bacteria	p__Firmicutes	c__Bacilli	o__Entomoplasmatales	f__type_III	g__norank_f__type_III	s__uncultured_Mollicutes_bacterium_g__norank	OTU6250	0	0	0	0	0	0	0	0	0	1	0	0	0	1	1	3
d__Bacteria	k__norank_d__Bacteria	p__Proteobacteria	c__Gammaproteobacteria	o__unclassified_c__Gammaproteobacteria	f__unclassified_c__Gammaproteobacteria	g__unclassified_c__Gammaproteobacteria	s__unclassified_c__Gammaproteobacteria	OTU617	0	0	3	0	0	0	0	0	0	0	0	0	0	0	0	3
d__Bacteria	k__norank_d__Bacteria	p__Proteobacteria	c__Alphaproteobacteria	o__Rickettsiales	f__SM2D12	g__norank_f__SM2D12	s__uncultured_Phyllobacteriaceae_bacterium_g__norank	OTU3512	0	0	0	0	0	0	0	0	0	0	167	0	0	0	0	167
d__Bacteria	k__norank_d__Bacteria	p__Proteobacteria	c__Gammaproteobacteria	o__Diplorickettsiales	f__Diplorickettsiaceae	g__Aquicella	s__unclassified_g__Aquicella	OTU2005	0	1	0	0	0	0	1	0	0	0	0	1	1	1	0	5
d__Bacteria	k__norank_d__Bacteria	p__Bacteroidota	c__Bacteroidia	o__Cytophagales	f__Microscillaceae	g__Ohtaekwangia	s__unclassified_g__Ohtaekwangia	OTU3062	2	0	0	0	0	0	0	0	0	105	44	0	0	0	31	182
d__Bacteria	k__norank_d__Bacteria	p__Proteobacteria	c__Gammaproteobacteria	o__Coxiellales	f__Coxiellaceae	g__Coxiella	s__uncultured_bacterium_g__Coxiella	OTU1441	0	0	0	0	0	1	0	4	0	0	0	0	0	0	0	5
d__Bacteria	k__norank_d__Bacteria	p__Firmicutes	c__Bacilli	o__unclassified_c__Bacilli	f__unclassified_c__Bacilli	g__unclassified_c__Bacilli	s__unclassified_c__Bacilli	OTU3656	0	0	0	0	0	0	0	0	0	0	0	5	0	0	0	5
d__Bacteria	k__norank_d__Bacteria	p__Chloroflexi	c__AD3	o__norank_c__AD3	f__norank_o__norank_c__AD3	g__norank_f__norank_o__norank_c__AD3	s__unclassified_g__norank_f__norank_o__norank_c__AD3	OTU2761	0	2	10	0	5	10	91	10	22	0	8	1	11	1	0	171
d__Bacteria	k__norank_d__Bacteria	p__Actinobacteriota	c__Thermoleophilia	o__Gaiellales	f__norank_o__Gaiellales	g__norank_f__norank_o__Gaiellales	s__metagenome_g__norank_f__norank_o__Gaiellales	OTU721	0	0	6	2	0	1	1	0	0	2	0	0	1	1	1	15
d__Bacteria	k__norank_d__Bacteria	p__Myxococcota	c__Polyangia	o__unclassified_c__Polyangia	f__unclassified_c__Polyangia	g__unclassified_c__Polyangia	s__unclassified_c__Polyangia	OTU221	0	1	0	0	0	0	0	0	0	2	0	0	0	0	0	3
d__Bacteria	k__norank_d__Bacteria	p__Acidobacteriota	c__Acidobacteriae	o__Acidobacteriales	f__norank_o__Acidobacteriales	g__norank_f__norank_o__Acidobacteriales	s__uncultured_forest_soil_bacterium_g__norank_f__norank_o__Acidobacteriales	OTU688	161	322	233	474	775	548	839	398	1161	17	180	340	261	145	67	5921
d__Bacteria	k__norank_d__Bacteria	p__Bacteroidota	c__Bacteroidia	o__Chitinophagales	f__norank_o__Chitinophagales	g__norank_f__norank_o__Chitinophagales	s__unclassified_g__norank_f__norank_o__Chitinophagales	OTU3765	0	2	3	1	0	0	3	0	0	0	0	1	0	0	1	11
d__Bacteria	k__norank_d__Bacteria	p__Bdellovibrionota	c__Oligoflexia	o__0319-6G20	f__norank_o__0319-6G20	g__norank_f__norank_o__0319-6G20	s__unclassified_g__norank_f__norank_o__0319-6G20	OTU5031	0	0	0	0	0	0	0	0	0	0	0	0	4	0	0	4
d__Bacteria	k__norank_d__Bacteria	p__Bdellovibrionota	c__Oligoflexia	o__0319-6G20	f__norank_o__0319-6G20	g__norank_f__norank_o__0319-6G20	s__unclassified_g__norank_f__norank_o__0319-6G20	OTU5033	0	0	0	0	0	0	0	0	0	0	0	0	7	0	0	7
d__Bacteria	k__norank_d__Bacteria	p__Bacteroidota	c__Kapabacteria	o__Kapabacteriales	f__norank_o__Kapabacteriales	g__norank_f__norank_o__Kapabacteriales	s__uncultured_bacterium_g__norank_f__norank_o__Kapabacteriales	OTU3408	0	1	1	0	0	0	1	0	0	0	3	0	0	1	1	8
d__Bacteria	k__norank_d__Bacteria	p__Chloroflexi	c__Anaerolineae	o__SBR1031	f__A4b	g__norank_f__A4b	s__unclassified_g__norank_f__A4b	OTU5811	0	0	1	0	0	0	0	0	0	5	0	0	0	1	2	9
d__Bacteria	k__norank_d__Bacteria	p__Verrucomicrobiota	c__Verrucomicrobiae	o__Pedosphaerales	f__Pedosphaeraceae	g__norank_f__Pedosphaeraceae	s__unclassified_g__norank_f__Pedosphaeraceae	OTU4357	0	0	0	0	0	0	0	0	1	0	0	0	0	2	0	3
d__Bacteria	k__norank_d__Bacteria	p__Proteobacteria	c__Gammaproteobacteria	o__Burkholderiales	f__Oxalobacteraceae	g__Massilia	s__Massilia_timonae	OTU5182	1	1	11	8	4	3	1	3	3	1	10	0	0	2	7	55
d__Bacteria	k__norank_d__Bacteria	p__Cyanobacteria	c__Sericytochromatia	o__norank_c__Sericytochromatia	f__norank_o__norank_c__Sericytochromatia	g__norank_f__norank_o__norank_c__Sericytochromatia	s__unclassified_g__norank_f__norank_o__norank_c__Sericytochromatia	OTU5060	0	0	0	1	0	0	0	4	0	0	0	0	4	0	0	9
d__Bacteria	k__norank_d__Bacteria	p__Actinobacteriota	c__Actinobacteria	o__Micromonosporales	f__Micromonosporaceae	g__Actinoplanes	s__Actinoplanes_missouriensis_431	OTU19	9	0	0	0	0	0	1	2	0	5	461	0	0	0	0	478
d__Bacteria	k__norank_d__Bacteria	p__Chloroflexi	c__KD4-96	o__norank_c__KD4-96	f__norank_o__norank_c__KD4-96	g__norank_f__norank_o__norank_c__KD4-96	s__uncultured_bacterium_g__norank_f__norank_o__norank_c__KD4-96	OTU4221	10	6	14	0	7	0	2	0	1	19	13	15	5	6	19	117
d__Bacteria	k__norank_d__Bacteria	p__Dependentiae	c__Babeliae	o__Babeliales	f__UBA12409	g__norank_f__UBA12409	s__unclassified_g__norank_f__UBA12409	OTU2540	0	0	0	0	0	1	0	2	0	0	0	0	0	0	0	3
d__Bacteria	k__norank_d__Bacteria	p__Proteobacteria	c__Gammaproteobacteria	o__Burkholderiales	f__Nitrosomonadaceae	g__Ellin6067	s__uncultured_bacterium_g__Ellin6067	OTU5884	11	17	16	3	6	5	1	1	15	82	23	37	9	69	4	299
d__Bacteria	k__norank_d__Bacteria	p__Verrucomicrobiota	c__Verrucomicrobiae	o__Chthoniobacterales	f__Chthoniobacteraceae	g__unclassified_f__Chthoniobacteraceae	s__unclassified_f__Chthoniobacteraceae	OTU6062	3	0	0	0	1	1	0	0	0	0	0	2	0	0	0	7
d__Bacteria	k__norank_d__Bacteria	p__Verrucomicrobiota	c__Verrucomicrobiae	o__Chthoniobacterales	f__Chthoniobacteraceae	g__Chthoniobacter	s__unclassified_g__Chthoniobacter	OTU3958	4	1	11	0	0	0	0	0	0	1	7	0	1	1	1	27
d__Bacteria	k__norank_d__Bacteria	p__unclassified_k__norank_d__Bacteria	c__unclassified_k__norank_d__Bacteria	o__unclassified_k__norank_d__Bacteria	f__unclassified_k__norank_d__Bacteria	g__unclassified_k__norank_d__Bacteria	s__unclassified_k__norank_d__Bacteria	OTU4883	3	0	0	1	1	1	5	0	6	0	0	1	4	0	0	22
d__Bacteria	k__norank_d__Bacteria	p__Myxococcota	c__Myxococcia	o__Myxococcales	f__Myxococcaceae	g__unclassified_f__Myxococcaceae	s__unclassified_f__Myxococcaceae	OTU799	0	0	0	0	0	0	1	0	0	0	0	1	0	0	1	3
d__Bacteria	k__norank_d__Bacteria	p__Chloroflexi	c__Ktedonobacteria	o__Ktedonobacterales	f__JG30-KF-AS9	g__norank_f__JG30-KF-AS9	s__uncultured_bacterium_g__norank_f__JG30-KF-AS9	OTU2607	4	6	0	5	2	10	4	6	23	1	5	0	1	3	0	70
d__Bacteria	k__norank_d__Bacteria	p__Myxococcota	c__Polyangia	o__mle1-27	f__norank_o__mle1-27	g__norank_f__norank_o__mle1-27	s__uncultured_Polyangiaceae_bacterium_g__norank_f__norank	OTU4000	1	0	0	0	0	0	0	0	0	0	0	0	0	0	0	1
d__Bacteria	k__norank_d__Bacteria	p__Actinobacteriota	c__Acidimicrobiia	o__Microtrichales	f__norank_o__Microtrichales	g__norank_f__norank_o__Microtrichales	s__unclassified_g__norank_f__norank_o__Microtrichales	OTU2932	0	0	0	0	0	0	0	0	0	8	7	0	0	0	0	15
d__Bacteria	k__norank_d__Bacteria	p__Proteobacteria	c__Gammaproteobacteria	o__unclassified_c__Gammaproteobacteria	f__unclassified_c__Gammaproteobacteria	g__unclassified_c__Gammaproteobacteria	s__unclassified_c__Gammaproteobacteria	OTU5923	5	1	1	0	0	0	0	0	0	1	0	0	0	0	0	8
d__Bacteria	k__norank_d__Bacteria	p__Cyanobacteria	c__Cyanobacteriia	o__Chloroplast	f__norank_o__Chloroplast	g__norank_f__norank_o__Chloroplast	s__unclassified_g__norank_f__norank_o__Chloroplast	OTU6108	0	0	0	0	0	1	1	0	0	0	0	0	0	0	0	2
d__Bacteria	k__norank_d__Bacteria	p__Proteobacteria	c__Alphaproteobacteria	o__Rhizobiales	f__Beijerinckiaceae	g__Roseiarcus	s__unclassified_g__Roseiarcus	OTU4921	11	37	37	45	69	77	152	122	24	4	2	18	170	9	4	781
d__Bacteria	k__norank_d__Bacteria	p__Proteobacteria	c__Alphaproteobacteria	o__Rhizobiales	f__Rhizobiales_Incertae_Sedis	g__Bauldia	s__uncultured_bacterium_g__Bauldia	OTU5675	0	2	3	0	0	0	0	0	0	9	2	5	1	1	6	29
d__Bacteria	k__norank_d__Bacteria	p__Proteobacteria	c__Gammaproteobacteria	o__Diplorickettsiales	f__Diplorickettsiaceae	g__Aquicella	s__unclassified_g__Aquicella	OTU1029	0	0	4	51	0	0	0	0	4	0	0	0	0	0	0	59
d__Bacteria	k__norank_d__Bacteria	p__Proteobacteria	c__Gammaproteobacteria	o__Diplorickettsiales	f__Diplorickettsiaceae	g__norank_f__Diplorickettsiaceae	s__unclassified_g__norank_f__Diplorickettsiaceae	OTU6270	0	0	0	1	0	0	0	0	0	0	0	0	0	0	0	1
d__Bacteria	k__norank_d__Bacteria	p__Nitrospirota	c__Nitrospiria	o__Nitrospirales	f__Nitrospiraceae	g__Nitrospira	s__unclassified_g__Nitrospira	OTU4531	1	0	0	0	0	0	0	0	1	1	0	0	0	0	0	3
d__Bacteria	k__norank_d__Bacteria	p__Firmicutes	c__Bacilli	o__Paenibacillales	f__Paenibacillaceae	g__Paenibacillus	s__Paenibacillus_sp._BIHB4019	OTU1392	0	0	0	0	0	7	0	0	0	0	0	0	0	0	0	7
d__Bacteria	k__norank_d__Bacteria	p__Chloroflexi	c__unclassified_p__Chloroflexi	o__unclassified_p__Chloroflexi	f__unclassified_p__Chloroflexi	g__unclassified_p__Chloroflexi	s__unclassified_p__Chloroflexi	OTU843	0	0	0	0	3	0	0	3	3	0	0	0	0	0	0	9
d__Bacteria	k__norank_d__Bacteria	p__Actinobacteriota	c__Acidimicrobiia	o__unclassified_c__Acidimicrobiia	f__unclassified_c__Acidimicrobiia	g__unclassified_c__Acidimicrobiia	s__unclassified_c__Acidimicrobiia	OTU905	0	0	1	2	9	5	53	6	4	2	3	6	29	0	0	120
d__Bacteria	k__norank_d__Bacteria	p__Dependentiae	c__Babeliae	o__Babeliales	f__Vermiphilaceae	g__norank_f__Vermiphilaceae	s__unclassified_g__norank_f__Vermiphilaceae	OTU5632	0	0	0	0	0	0	0	0	0	0	0	0	0	0	2	2
d__Bacteria	k__norank_d__Bacteria	p__Proteobacteria	c__Alphaproteobacteria	o__Elsterales	f__norank_o__Elsterales	g__norank_f__norank_o__Elsterales	s__uncultured_Alphaproteobacteria_bacterium_g__norank_f__norank_o__Elsterales	OTU5847	0	8	2	0	6	1	19	6	6	15	1	3	5	3	3	78
d__Bacteria	k__norank_d__Bacteria	p__Bacteroidota	c__Bacteroidia	o__Chitinophagales	f__Chitinophagaceae	g__Edaphobaculum	s__uncultured_bacterium_g__Edaphobaculum	OTU5535	0	0	0	0	0	0	0	0	0	0	0	0	0	0	9	9
d__Bacteria	k__norank_d__Bacteria	p__Proteobacteria	c__Gammaproteobacteria	o__Burkholderiales	f__A21b	g__norank_f__A21b	s__uncultured_bacterium_g__norank_f__A21b	OTU326	8	8	0	0	0	0	0	0	0	0	0	0	0	3	0	19
d__Bacteria	k__norank_d__Bacteria	p__Bacteroidota	c__Bacteroidia	o__Chitinophagales	f__Chitinophagaceae	g__Niastella	s__Niastella_koreensis_GR20-10	OTU5236	4	4	4	0	0	2	0	0	0	6	6	3	0	4	5	38
d__Bacteria	k__norank_d__Bacteria	p__Firmicutes	c__Clostridia	o__norank_c__Clostridia	f__Hungateiclostridiaceae	g__norank_f__Hungateiclostridiaceae	s__uncultured_bacterium_g__norank_f__Hungateiclostridiaceae	OTU443	0	0	4	0	0	0	0	0	0	0	0	0	0	2	0	6
d__Bacteria	k__norank_d__Bacteria	p__Firmicutes	c__Bacilli	o__Bacillales	f__Bacillaceae	g__Pseudogracilibacillus	s__unclassified_g__Pseudogracilibacillus	OTU5011	0	0	1	0	0	0	0	0	0	0	0	0	2	0	0	3
d__Bacteria	k__norank_d__Bacteria	p__Proteobacteria	c__Gammaproteobacteria	o__Diplorickettsiales	f__Diplorickettsiaceae	g__norank_f__Diplorickettsiaceae	s__unclassified_g__norank_f__Diplorickettsiaceae	OTU6496	0	1	1	1	5	0	0	0	0	0	0	2	1	0	0	11
d__Bacteria	k__norank_d__Bacteria	p__Proteobacteria	c__Gammaproteobacteria	o__unclassified_c__Gammaproteobacteria	f__unclassified_c__Gammaproteobacteria	g__unclassified_c__Gammaproteobacteria	s__unclassified_c__Gammaproteobacteria	OTU2598	0	0	0	1	0	0	0	1	0	0	0	0	0	0	0	2
d__Bacteria	k__norank_d__Bacteria	p__Bacteroidota	c__Bacteroidia	o__Flavobacteriales	f__Crocinitomicaceae	g__Fluviicola	s__uncultured_bacterium_g__Fluviicola	OTU723	0	0	13	0	0	0	0	0	0	0	0	0	0	0	0	13
d__Bacteria	k__norank_d__Bacteria	p__Bacteroidota	c__SJA-28	o__norank_c__SJA-28	f__norank_o__norank_c__SJA-28	g__norank_f__norank_o__norank_c__SJA-28	s__Chlorobi_bacterium_OLB5	OTU3064	0	0	0	0	0	0	0	0	0	7	3	0	0	0	2	12
d__Bacteria	k__norank_d__Bacteria	p__Chloroflexi	c__Ktedonobacteria	o__Ktedonobacterales	f__Ktedonobacteraceae	g__HSB_OF53-F07	s__unclassified_g__HSB_OF53-F07	OTU838	18	10	6	76	6	33	15	49	62	0	7	1	10	1	4	298
d__Bacteria	k__norank_d__Bacteria	p__Proteobacteria	c__Gammaproteobacteria	o__Diplorickettsiales	f__Diplorickettsiaceae	g__norank_f__Diplorickettsiaceae	s__uncultured_bacterium_g__norank_f__Diplorickettsiaceae	OTU186	0	3	0	0	0	0	0	0	1	0	0	0	0	0	0	4
d__Bacteria	k__norank_d__Bacteria	p__Proteobacteria	c__Gammaproteobacteria	o__Diplorickettsiales	f__Diplorickettsiaceae	g__norank_f__Diplorickettsiaceae	s__unclassified_g__norank_f__Diplorickettsiaceae	OTU2009	0	0	0	0	0	0	3	9	0	0	0	0	0	0	0	12
d__Bacteria	k__norank_d__Bacteria	p__Armatimonadota	c__Fimbriimonadia	o__Fimbriimonadales	f__Fimbriimonadaceae	g__norank_f__Fimbriimonadaceae	s__unclassified_g__norank_f__Fimbriimonadaceae	OTU3779	1	0	9	0	1	1	0	2	0	0	0	3	2	2	1	22
d__Bacteria	k__norank_d__Bacteria	p__Myxococcota	c__Polyangia	o__Polyangiales	f__Sandaracinaceae	g__norank_f__Sandaracinaceae	s__uncultured_bacterium_g__norank_f__Sandaracinaceae	OTU4613	0	0	0	1	0	0	1	6	0	4	0	2	0	0	1	15
d__Bacteria	k__norank_d__Bacteria	p__Firmicutes	c__Clostridia	o__norank_c__Clostridia	f__Hungateiclostridiaceae	g__unclassified_f__Hungateiclostridiaceae	s__unclassified_f__Hungateiclostridiaceae	OTU846	0	0	1	0	0	0	0	0	2	0	0	0	0	0	0	3
d__Bacteria	k__norank_d__Bacteria	p__Proteobacteria	c__Alphaproteobacteria	o__Sphingomonadales	f__Sphingomonadaceae	g__Sphingomonas	s__unclassified_g__Sphingomonas	OTU5699	122	54	23	28	10	20	10	26	67	25	28	2	2	27	26	470
d__Bacteria	k__norank_d__Bacteria	p__Dependentiae	c__Babeliae	o__Babeliales	f__norank_o__Babeliales	g__norank_f__norank_o__Babeliales	s__uncultured_bacterium_g__norank_f__norank_o__Babeliales	OTU6463	1	0	0	0	3	0	1	0	0	0	0	0	0	0	0	5
d__Bacteria	k__norank_d__Bacteria	p__Acidobacteriota	c__Acidobacteriae	o__Acidobacteriales	f__Acidobacteriaceae_Subgroup_1	g__Acidipila	s__uncultured_bacterium_g__Acidipila	OTU3767	1	8	1	0	4	5	13	8	34	6	22	59	103	0	3	267
d__Bacteria	k__norank_d__Bacteria	p__Proteobacteria	c__Alphaproteobacteria	o__Rhizobiales	f__Beijerinckiaceae	g__alphaI_cluster	s__uncultured_bacterium_g__alphaI_cluster	OTU1820	39	93	42	218	22	176	241	39	37	4	35	21	20	11	2	1000
d__Bacteria	k__norank_d__Bacteria	p__Dependentiae	c__Babeliae	o__Babeliales	f__Vermiphilaceae	g__norank_f__Vermiphilaceae	s__uncultured_bacterium_g__norank_f__Vermiphilaceae	OTU1301	0	0	0	0	13	0	0	0	1	0	0	0	0	0	0	14
d__Bacteria	k__norank_d__Bacteria	p__Gemmatimonadota	c__S0134_terrestrial_group	o__norank_c__S0134_terrestrial_group	f__norank_o__norank_c__S0134_terrestrial_group	g__norank_f__norank_o__norank_c__S0134_terrestrial_group	s__uncultured_soil_bacterium_g__norank_f__norank_o__norank_c__S0134_terrestrial_group	OTU3171	0	0	0	0	0	0	0	0	0	1	0	0	0	0	0	1
d__Bacteria	k__norank_d__Bacteria	p__Chloroflexi	c__TK10	o__norank_c__TK10	f__norank_o__norank_c__TK10	g__norank_f__norank_o__norank_c__TK10	s__unclassified_g__norank_f__norank_o__norank_c__TK10	OTU6527	0	0	0	0	0	0	0	0	0	2	0	0	0	0	0	2
d__Bacteria	k__norank_d__Bacteria	p__Acidobacteriota	c__AT-s3-28	o__norank_c__AT-s3-28	f__norank_o__norank_c__AT-s3-28	g__norank_f__norank_o__norank_c__AT-s3-28	s__uncultured_bacterium_g__norank_f__norank_o__norank_c__AT-s3-28	OTU5952	0	0	0	0	0	0	0	0	0	0	0	0	1	0	1	2
d__Bacteria	k__norank_d__Bacteria	p__Proteobacteria	c__Alphaproteobacteria	o__Rickettsiales	f__SM2D12	g__norank_f__SM2D12	s__unclassified_g__norank_f__SM2D12	OTU4663	0	0	0	1	0	2	2	0	6	0	0	1	0	1	0	13
d__Bacteria	k__norank_d__Bacteria	p__Bacteroidota	c__Bacteroidia	o__Cytophagales	f__Microscillaceae	g__norank_f__Microscillaceae	s__unclassified_g__norank_f__Microscillaceae	OTU5691	0	0	0	0	0	0	0	0	0	3	1	21	1	2	0	28
d__Bacteria	k__norank_d__Bacteria	p__Verrucomicrobiota	c__Chlamydiae	o__Chlamydiales	f__Parachlamydiaceae	g__unclassified_f__Parachlamydiaceae	s__unclassified_f__Parachlamydiaceae	OTU648	0	0	6	1	0	0	0	0	1	0	0	0	0	0	0	8
d__Bacteria	k__norank_d__Bacteria	p__Proteobacteria	c__Gammaproteobacteria	o__Gammaproteobacteria_Incertae_Sedis	f__unclassified_o__Gammaproteobacteria_Incertae_Sedis	g__Acidibacter	s__uncultured_bacterium_g__Acidibacter	OTU2275	224	228	87	284	237	354	477	303	543	29	93	144	141	164	38	3346
d__Bacteria	k__norank_d__Bacteria	p__Latescibacterota	c__Latescibacteria	o__Latescibacterales	f__Latescibacteraceae	g__norank_f__Latescibacteraceae	s__metagenome_g__norank_f__Latescibacteraceae	OTU5573	1	1	0	0	0	0	0	0	0	5	3	0	1	1	4	16
d__Bacteria	k__norank_d__Bacteria	p__Acidobacteriota	c__Vicinamibacteria	o__Vicinamibacterales	f__norank_o__Vicinamibacterales	g__norank_f__norank_o__Vicinamibacterales	s__unclassified_g__norank_f__norank_o__Vicinamibacterales	OTU2411	10	10	5	1	12	6	9	5	12	1	5	3	1	6	2	88
d__Bacteria	k__norank_d__Bacteria	p__Chloroflexi	c__Ktedonobacteria	o__Ktedonobacterales	f__Ktedonobacteraceae	g__norank_f__Ktedonobacteraceae	s__uncultured_bacterium_g__norank_f__Ktedonobacteraceae	OTU1075	0	0	0	2	0	0	0	0	21	0	0	0	0	0	0	23
d__Bacteria	k__norank_d__Bacteria	p__Proteobacteria	c__Gammaproteobacteria	o__Diplorickettsiales	f__Diplorickettsiaceae	g__norank_f__Diplorickettsiaceae	s__uncultured_Coxiellaceae_bacterium_g__norank_f__Diplorickettsiaceae	OTU5311	0	0	0	0	0	0	1	0	0	0	4	1	0	2	0	8
d__Bacteria	k__norank_d__Bacteria	p__Actinobacteriota	c__Actinobacteria	o__Streptosporangiales	f__Thermomonosporaceae	g__Actinomadura	s__unclassified_g__Actinomadura	OTU2543	1	73	2	214	11	1408	36	987	5	0	0	1	30	4	4	2776
d__Bacteria	k__norank_d__Bacteria	p__Chloroflexi	c__Ktedonobacteria	o__Ktedonobacterales	f__Ktedonobacteraceae	g__unclassified_f__Ktedonobacteraceae	s__unclassified_f__Ktedonobacteraceae	OTU1062	0	0	0	3	0	0	0	0	0	0	0	0	0	0	0	3
d__Bacteria	k__norank_d__Bacteria	p__Firmicutes	c__Bacilli	o__Paenibacillales	f__Paenibacillaceae	g__Paenibacillus	s__unclassified_g__Paenibacillus	OTU3653	0	0	0	0	0	0	0	1	0	0	0	1	0	0	0	2
d__Bacteria	k__norank_d__Bacteria	p__Chloroflexi	c__Anaerolineae	o__Anaerolineales	f__Anaerolineaceae	g__norank_f__Anaerolineaceae	s__uncultured_prokaryote_g__norank_f__Anaerolineaceae	OTU4419	5	0	0	0	0	0	0	0	0	0	0	0	0	0	0	5
d__Bacteria	k__norank_d__Bacteria	p__Actinobacteriota	c__Thermoleophilia	o__Solirubrobacterales	f__Solirubrobacteraceae	g__Conexibacter	s__uncultured_bacterium_g__Conexibacter	OTU5337	101	150	70	126	167	163	196	170	163	5	35	10	132	42	9	1539
d__Bacteria	k__norank_d__Bacteria	p__Proteobacteria	c__Alphaproteobacteria	o__Rickettsiales	f__Mitochondria	g__norank_f__Mitochondria	s__Triticum_aestivum_bread_wheat_g__norank	OTU6144	0	0	0	0	0	0	0	2	0	0	0	0	0	0	0	2
d__Bacteria	k__norank_d__Bacteria	p__Bacteroidota	c__Bacteroidia	o__Cytophagales	f__Amoebophilaceae	g__Candidatus_Amoebophilus	s__unclassified_g__Candidatus_Amoebophilus	OTU5550	0	0	1	0	1	0	0	0	2	0	3	0	1	3	2	13
d__Bacteria	k__norank_d__Bacteria	p__Chloroflexi	c__Ktedonobacteria	o__Ktedonobacterales	f__JG30-KF-AS9	g__norank_f__JG30-KF-AS9	s__unclassified_g__norank_f__JG30-KF-AS9	OTU823	1	1	0	2	0	4	2	1	3	0	1	0	0	1	0	16
d__Bacteria	k__norank_d__Bacteria	p__Planctomycetota	c__Planctomycetes	o__Gemmatales	f__Gemmataceae	g__norank_f__Gemmataceae	s__unclassified_g__norank_f__Gemmataceae	OTU2501	0	0	0	3	0	2	0	3	4	0	0	0	0	0	0	12
d__Bacteria	k__norank_d__Bacteria	p__Dependentiae	c__Babeliae	o__Babeliales	f__unclassified_o__Babeliales	g__unclassified_o__Babeliales	s__unclassified_o__Babeliales	OTU6582	0	0	0	3	0	0	1	0	0	3	4	5	1	0	3	20
d__Bacteria	k__norank_d__Bacteria	p__Myxococcota	c__Polyangia	o__Polyangiales	f__Phaselicystidaceae	g__Phaselicystis	s__uncultured_Polyangiaceae_bacterium_g__Phaselicystis	OTU440	27	7	3	0	1	2	1	0	1	49	2	1	2	9	7	112
d__Bacteria	k__norank_d__Bacteria	p__Myxococcota	c__Myxococcia	o__Myxococcales	f__Myxococcaceae	g__P3OB-42	s__unclassified_g__P3OB-42	OTU3164	0	0	0	0	0	0	0	0	0	4	0	0	0	0	0	4
d__Bacteria	k__norank_d__Bacteria	p__Actinobacteriota	c__Acidimicrobiia	o__IMCC26256	f__norank_o__IMCC26256	g__norank_f__norank_o__IMCC26256	s__Aciditerrimonas_sp.	OTU1625	0	0	0	0	0	0	4	0	0	0	0	4	0	0	0	8
d__Bacteria	k__norank_d__Bacteria	p__Acidobacteriota	c__Blastocatellia	o__11-24	f__norank_o__11-24	g__norank_f__norank_o__11-24	s__Acidobacteria_bacterium_Ellin7246	OTU4435	0	0	0	0	0	0	0	0	0	0	0	0	0	1	0	1
d__Bacteria	k__norank_d__Bacteria	p__Actinobacteriota	c__Thermoleophilia	o__Solirubrobacterales	f__Solirubrobacteraceae	g__JCM_18997	s__Conexibacter_sp._JCM_18997	OTU3066	1	5	3	1	5	0	0	2	0	30	1	6	0	0	15	69
d__Bacteria	k__norank_d__Bacteria	p__Gemmatimonadota	c__Gemmatimonadetes	o__Gemmatimonadales	f__Gemmatimonadaceae	g__Gemmatimonas	s__uncultured_bacterium_g__Gemmatimonas	OTU997	0	0	0	2	0	0	0	0	0	0	0	0	0	0	0	2
d__Bacteria	k__norank_d__Bacteria	p__Bacteroidota	c__Bacteroidia	o__Chitinophagales	f__Chitinophagaceae	g__Filimonas	s__unclassified_g__Filimonas	OTU5822	0	0	0	0	0	0	0	0	0	2	0	0	0	0	1	3
d__Bacteria	k__norank_d__Bacteria	p__Actinobacteriota	c__Acidimicrobiia	o__IMCC26256	f__norank_o__IMCC26256	g__norank_f__norank_o__IMCC26256	s__Aciditerrimonas_sp.	OTU1628	0	0	0	0	0	0	5	1	1	0	0	0	0	0	0	7
d__Bacteria	k__norank_d__Bacteria	p__Dependentiae	c__Babeliae	o__Babeliales	f__Vermiphilaceae	g__norank_f__Vermiphilaceae	s__metagenome_g__norank_f__Vermiphilaceae	OTU2469	0	0	1	0	0	0	6	12	1	0	0	1	0	0	0	21
d__Bacteria	k__norank_d__Bacteria	p__Proteobacteria	c__Gammaproteobacteria	o__Steroidobacterales	f__Steroidobacteraceae	g__Steroidobacter	s__uncultured_bacterium_g__Steroidobacter	OTU4550	0	0	0	0	0	0	0	0	0	9	0	4	1	5	53	72
d__Bacteria	k__norank_d__Bacteria	p__Myxococcota	c__Myxococcia	o__Myxococcales	f__Anaeromyxobacteraceae	g__Anaeromyxobacter	s__unclassified_g__Anaeromyxobacter	OTU1293	0	0	0	0	4	2	0	2	2	0	0	2	1	1	0	14
d__Bacteria	k__norank_d__Bacteria	p__Myxococcota	c__Polyangia	o__Polyangiales	f__Polyangiaceae	g__Sorangium	s__unclassified_g__Sorangium	OTU2448	0	4	3	0	0	0	0	3	1	0	0	0	0	3	0	14
d__Bacteria	k__norank_d__Bacteria	p__Myxococcota	c__Polyangia	o__unclassified_c__Polyangia	f__unclassified_c__Polyangia	g__unclassified_c__Polyangia	s__unclassified_c__Polyangia	OTU414	0	0	2	0	0	0	0	0	0	0	0	0	0	0	0	2
d__Bacteria	k__norank_d__Bacteria	p__Planctomycetota	c__Planctomycetes	o__Isosphaerales	f__Isosphaeraceae	g__unclassified_f__Isosphaeraceae	s__unclassified_f__Isosphaeraceae	OTU2047	0	0	0	1	1	3	3	4	5	0	0	0	5	0	0	22
d__Bacteria	k__norank_d__Bacteria	p__Planctomycetota	c__Planctomycetes	o__Gemmatales	f__Gemmataceae	g__norank_f__Gemmataceae	s__unclassified_g__norank_f__Gemmataceae	OTU423	10	7	36	10	40	7	26	33	33	0	2	9	10	9	2	234
d__Bacteria	k__norank_d__Bacteria	p__Elusimicrobiota	c__Elusimicrobia	o__Lineage_IV	f__norank_o__Lineage_IV	g__norank_f__norank_o__Lineage_IV	s__uncultured_bacterium_g__norank_f__norank_o__Lineage_IV	OTU1217	0	0	0	0	4	1	0	0	8	0	0	2	0	2	0	17
d__Bacteria	k__norank_d__Bacteria	p__Verrucomicrobiota	c__Chlamydiae	o__Chlamydiales	f__unclassified_o__Chlamydiales	g__unclassified_o__Chlamydiales	s__unclassified_o__Chlamydiales	OTU5086	0	0	1	1	0	0	1	0	0	0	0	0	8	0	0	11
d__Bacteria	k__norank_d__Bacteria	p__Chloroflexi	c__Ktedonobacteria	o__Ktedonobacterales	f__Ktedonobacteraceae	g__FCPS473	s__uncultured_Ktedobacteria_bacterium_g__FCPS473	OTU6366	0	0	0	0	0	1	0	0	0	0	0	0	0	0	0	1
d__Bacteria	k__norank_d__Bacteria	p__Myxococcota	c__Polyangia	o__Haliangiales	f__Haliangiaceae	g__Haliangium	s__uncultured_bacterium_g__Haliangium	OTU3270	0	0	0	0	0	0	0	0	0	2	1	0	0	0	1	4
d__Bacteria	k__norank_d__Bacteria	p__Gemmatimonadota	c__Gemmatimonadetes	o__Gemmatimonadales	f__Gemmatimonadaceae	g__norank_f__Gemmatimonadaceae	s__unclassified_g__norank_f__Gemmatimonadaceae	OTU3931	2	2	0	0	0	0	0	0	1	1	2	0	0	2	4	14
d__Bacteria	k__norank_d__Bacteria	p__Chloroflexi	c__Ktedonobacteria	o__Ktedonobacterales	f__Ktedonobacteraceae	g__Thermosporothrix	s__uncultured_bacterium_g__Thermosporothrix	OTU837	139	798	330	214	28	337	241	717	603	0	5	43	114	35	89	3693
d__Bacteria	k__norank_d__Bacteria	p__Bdellovibrionota	c__Oligoflexia	o__Oligoflexales	f__norank_o__Oligoflexales	g__norank_f__norank_o__Oligoflexales	s__unclassified_g__norank_f__norank_o__Oligoflexales	OTU775	0	5	1	0	0	0	0	0	0	0	0	1	0	0	0	7
d__Bacteria	k__norank_d__Bacteria	p__unclassified_k__norank_d__Bacteria	c__unclassified_k__norank_d__Bacteria	o__unclassified_k__norank_d__Bacteria	f__unclassified_k__norank_d__Bacteria	g__unclassified_k__norank_d__Bacteria	s__unclassified_k__norank_d__Bacteria	OTU2103	0	0	0	1	0	0	2	2	0	0	0	0	0	0	0	5
d__Bacteria	k__norank_d__Bacteria	p__Chloroflexi	c__Ktedonobacteria	o__Ktedonobacterales	f__unclassified_o__Ktedonobacterales	g__unclassified_o__Ktedonobacterales	s__unclassified_o__Ktedonobacterales	OTU6303	0	0	0	0	0	0	0	0	0	0	0	0	0	1	0	1
d__Bacteria	k__norank_d__Bacteria	p__Verrucomicrobiota	c__Verrucomicrobiae	o__Pedosphaerales	f__Pedosphaeraceae	g__norank_f__Pedosphaeraceae	s__unclassified_g__norank_f__Pedosphaeraceae	OTU3144	0	0	0	0	0	0	0	0	0	2	3	0	0	0	3	8
d__Bacteria	k__norank_d__Bacteria	p__Proteobacteria	c__Alphaproteobacteria	o__Caulobacterales	f__Hyphomonadaceae	g__Hirschia	s__uncultured_bacterium_g__Hirschia	OTU5146	6	3	4	1	0	1	2	0	1	30	2	0	0	1	49	100
d__Bacteria	k__norank_d__Bacteria	p__Planctomycetota	c__Phycisphaerae	o__Phycisphaerales	f__Phycisphaeraceae	g__SM1A02	s__unclassified_g__SM1A02	OTU3521	0	0	0	0	0	0	0	0	0	0	6	0	0	0	0	6
d__Bacteria	k__norank_d__Bacteria	p__Actinobacteriota	c__Actinobacteria	o__Micrococcales	f__Dermacoccaceae	g__Flexivirga	s__uncultured_bacterium_g__Flexivirga	OTU6229	0	3	0	0	2	0	0	0	0	0	3	8	5	0	0	21
d__Bacteria	k__norank_d__Bacteria	p__Acidobacteriota	c__Thermoanaerobaculia	o__Thermoanaerobaculales	f__Thermoanaerobaculaceae	g__Subgroup_10	s__unclassified_g__Subgroup_10	OTU1540	0	0	19	20	0	2	0	1	0	3	0	0	0	0	0	45
d__Bacteria	k__norank_d__Bacteria	p__Elusimicrobiota	c__Elusimicrobia	o__Lineage_IV	f__norank_o__Lineage_IV	g__norank_f__norank_o__Lineage_IV	s__uncultured_soil_bacterium_g__norank_f__norank_o__Lineage_IV	OTU3760	0	0	0	1	3	0	1	0	0	0	0	0	0	0	0	5
d__Bacteria	k__norank_d__Bacteria	p__Acidobacteriota	c__Vicinamibacteria	o__Vicinamibacterales	f__Vicinamibacteraceae	g__norank_f__Vicinamibacteraceae	s__unclassified_g__norank_f__Vicinamibacteraceae	OTU495	0	0	8	0	1	0	0	0	0	1	11	0	0	0	5	26
d__Bacteria	k__norank_d__Bacteria	p__Proteobacteria	c__Gammaproteobacteria	o__Acidiferrobacterales	f__Acidiferrobacteraceae	g__Sulfurifustis	s__unclassified_g__Sulfurifustis	OTU3178	0	0	0	0	0	0	0	0	0	3	4	0	0	3	1	11
d__Bacteria	k__norank_d__Bacteria	p__Proteobacteria	c__Alphaproteobacteria	o__Rhizobiales	f__Beijerinckiaceae	g__1174-901-12	s__uncultured_bacterium_g__1174-901-12	OTU1867	0	0	0	1	1	0	2	0	0	0	0	0	0	0	0	4
d__Bacteria	k__norank_d__Bacteria	p__Bdellovibrionota	c__Oligoflexia	o__Oligoflexales	f__norank_o__Oligoflexales	g__Oligoflexus	s__unclassified_g__Oligoflexus	OTU4615	2	0	0	0	0	0	0	0	2	1	2	0	0	0	3	10
d__Bacteria	k__norank_d__Bacteria	p__Armatimonadota	c__Fimbriimonadia	o__Fimbriimonadales	f__Fimbriimonadaceae	g__norank_f__Fimbriimonadaceae	s__uncultured_bacterium_g__norank_f__Fimbriimonadaceae	OTU3613	0	0	1	0	0	0	0	0	0	0	0	4	1	0	1	7
d__Bacteria	k__norank_d__Bacteria	p__Verrucomicrobiota	c__Chlamydiae	o__Chlamydiales	f__Simkaniaceae	g__norank_f__Simkaniaceae	s__unclassified_g__norank_f__Simkaniaceae	OTU3756	0	0	0	0	2	0	3	0	1	0	0	1	0	0	0	7
d__Bacteria	k__norank_d__Bacteria	p__Planctomycetota	c__Planctomycetes	o__Isosphaerales	f__Isosphaeraceae	g__Candidatus_Nostocoida	s__uncultured_soil_bacterium_g__Candidatus_Nostocoida	OTU601	0	0	5	0	0	0	3	0	1	0	0	0	0	0	0	9
d__Bacteria	k__norank_d__Bacteria	p__Armatimonadota	c__Chthonomonadetes	o__Chthonomonadales	f__norank_o__Chthonomonadales	g__norank_f__norank_o__Chthonomonadales	s__uncultured_bacterium_g__norank_f__norank_o__Chthonomonadales	OTU5235	0	0	0	0	0	0	0	0	3	0	1	1	0	2	0	7
d__Bacteria	k__norank_d__Bacteria	p__RCP2-54	c__norank_p__RCP2-54	o__norank_c__norank_p__RCP2-54	f__norank_o__norank_c__norank_p__RCP2-54	g__norank_f__norank_o__norank_c__norank_p__RCP2-54	s__uncultured_bacterium_g__norank_f__norank_o__norank_c__norank_p__RCP2-54	OTU2046	2	2	6	0	9	5	22	5	2	0	0	1	3	1	0	58
d__Bacteria	k__norank_d__Bacteria	p__Gemmatimonadota	c__Gemmatimonadetes	o__Gemmatimonadales	f__Gemmatimonadaceae	g__Gemmatimonas	s__unclassified_g__Gemmatimonas	OTU2183	1	3	4	2	1	0	4	0	0	8	0	2	5	0	3	33
d__Bacteria	k__norank_d__Bacteria	p__Acidobacteriota	c__Blastocatellia	o__11-24	f__norank_o__11-24	g__norank_f__norank_o__11-24	s__unclassified_g__norank_f__norank_o__11-24	OTU3969	0	0	0	0	0	0	0	0	0	0	0	0	0	0	2	2
d__Bacteria	k__norank_d__Bacteria	p__Proteobacteria	c__Gammaproteobacteria	o__Diplorickettsiales	f__Diplorickettsiaceae	g__Aquicella	s__unclassified_g__Aquicella	OTU1905	3	1	0	0	1	2	27	1	0	0	0	0	0	0	0	35
d__Bacteria	k__norank_d__Bacteria	p__Patescibacteria	c__Saccharimonadia	o__Saccharimonadales	f__norank_o__Saccharimonadales	g__norank_f__norank_o__Saccharimonadales	s__unclassified_g__norank_f__norank_o__Saccharimonadales	OTU4971	0	5	0	0	0	0	0	2	0	0	0	2	5	6	2	22
d__Bacteria	k__norank_d__Bacteria	p__Bacteroidota	c__Bacteroidia	o__Flavobacteriales	f__Flavobacteriaceae	g__Flavobacterium	s__unclassified_g__Flavobacterium	OTU4533	11	2	24	3	1	3	0	0	6	148	59	9	0	32	34	332
d__Bacteria	k__norank_d__Bacteria	p__Myxococcota	c__Myxococcia	o__Myxococcales	f__Myxococcaceae	g__P3OB-42	s__uncultured_bacterium_g__P3OB-42	OTU1831	0	0	0	0	0	0	1	1	0	0	0	0	0	0	0	2
d__Bacteria	k__norank_d__Bacteria	p__Bacteroidota	c__Kryptonia	o__Kryptoniales	f__BSV26	g__norank_f__BSV26	s__unclassified_g__norank_f__BSV26	OTU18	2	0	0	0	0	0	0	0	0	0	0	0	0	0	0	2
d__Bacteria	k__norank_d__Bacteria	p__Myxococcota	c__Myxococcia	o__Myxococcales	f__Myxococcaceae	g__P3OB-42	s__unclassified_g__P3OB-42	OTU962	0	0	0	2	0	0	0	0	0	1	0	0	0	0	0	3
d__Bacteria	k__norank_d__Bacteria	p__Armatimonadota	c__norank_p__Armatimonadota	o__norank_c__norank_p__Armatimonadota	f__norank_o__norank_c__norank_p__Armatimonadota	g__norank_f__norank_o__norank_c__norank_p__Armatimonadota	s__unclassified_g__norank_f__norank_o__norank_c__norank_p__Armatimonadota	OTU3684	0	0	0	0	0	0	0	0	0	0	5	2	0	0	0	7
d__Bacteria	k__norank_d__Bacteria	p__Chloroflexi	c__JG30-KF-CM66	o__norank_c__JG30-KF-CM66	f__norank_o__norank_c__JG30-KF-CM66	g__norank_f__norank_o__norank_c__JG30-KF-CM66	s__uncultured_bacterium_g__norank_f__norank_o__norank_c__JG30-KF-CM66	OTU4601	0	0	0	0	0	0	0	0	0	0	0	0	0	1	0	1
d__Bacteria	k__norank_d__Bacteria	p__Bacteroidota	c__Bacteroidia	o__Chitinophagales	f__Chitinophagaceae	g__Edaphobaculum	s__uncultured_bacterium_g__Edaphobaculum	OTU5706	0	0	0	0	0	0	0	0	0	1	0	0	0	0	0	1
d__Bacteria	k__norank_d__Bacteria	p__Proteobacteria	c__Alphaproteobacteria	o__Rhodobacterales	f__Rhodobacteraceae	g__unclassified_f__Rhodobacteraceae	s__unclassified_f__Rhodobacteraceae	OTU2157	0	0	1	0	0	1	0	1	2	0	0	0	0	0	0	5
d__Bacteria	k__norank_d__Bacteria	p__Proteobacteria	c__Gammaproteobacteria	o__Burkholderiales	f__unclassified_o__Burkholderiales	g__unclassified_o__Burkholderiales	s__unclassified_o__Burkholderiales	OTU5657	0	0	0	0	0	0	0	0	0	0	0	0	0	0	4	4
d__Bacteria	k__norank_d__Bacteria	p__Proteobacteria	c__Gammaproteobacteria	o__Legionellales	f__Legionellaceae	g__Legionella	s__unclassified_g__Legionella	OTU3297	0	0	0	0	0	0	0	0	0	0	5	0	0	0	0	5
d__Bacteria	k__norank_d__Bacteria	p__Actinobacteriota	c__Acidimicrobiia	o__Microtrichales	f__Iamiaceae	g__Iamia	s__uncultured_bacterium_g__Iamia	OTU3230	22	0	17	1	7	1	1	0	0	57	21	0	0	1	13	141
d__Bacteria	k__norank_d__Bacteria	p__Acidobacteriota	c__Vicinamibacteria	o__Vicinamibacterales	f__norank_o__Vicinamibacterales	g__norank_f__norank_o__Vicinamibacterales	s__unclassified_g__norank_f__norank_o__Vicinamibacterales	OTU3427	0	0	0	0	2	2	1	1	0	0	2	0	0	1	0	9
d__Bacteria	k__norank_d__Bacteria	p__Bdellovibrionota	c__Bdellovibrionia	o__Bdellovibrionales	f__Bdellovibrionaceae	g__Bdellovibrio	s__uncultured_bacterium_g__Bdellovibrio	OTU5981	0	0	4	0	1	0	0	1	5	1	0	1	1	0	1	15
d__Bacteria	k__norank_d__Bacteria	p__Proteobacteria	c__Gammaproteobacteria	o__Gammaproteobacteria_Incertae_Sedis	f__unclassified_o__Gammaproteobacteria_Incertae_Sedis	g__Candidatus_Berkiella	s__uncultured_bacterium_g__Candidatus_Berkiella	OTU918	0	0	0	2	0	1	0	1	0	0	0	0	0	0	0	4
d__Bacteria	k__norank_d__Bacteria	p__Proteobacteria	c__Alphaproteobacteria	o__Rhizobiales	f__unclassified_o__Rhizobiales	g__unclassified_o__Rhizobiales	s__unclassified_o__Rhizobiales	OTU2399	1	0	0	0	2	3	0	1	3	2	0	1	0	2	0	15
d__Bacteria	k__norank_d__Bacteria	p__Chloroflexi	c__Ktedonobacteria	o__Ktedonobacterales	f__Ktedonobacteraceae	g__BacC-u-018	s__unclassified_g__BacC-u-018	OTU2246	0	0	1	4	0	0	0	0	10	0	2	0	0	0	0	17
d__Bacteria	k__norank_d__Bacteria	p__Proteobacteria	c__Alphaproteobacteria	o__Azospirillales	f__norank_o__Azospirillales	g__norank_f__norank_o__Azospirillales	s__unclassified_g__norank_f__norank_o__Azospirillales	OTU1472	0	0	0	0	0	2	0	0	0	0	0	0	0	0	0	2
d__Bacteria	k__norank_d__Bacteria	p__Actinobacteriota	c__Acidimicrobiia	o__norank_c__Acidimicrobiia	f__norank_o__norank_c__Acidimicrobiia	g__norank_f__norank_o__norank_c__Acidimicrobiia	s__uncultured_bacterium_g__norank_f__norank_o__norank_c__Acidimicrobiia	OTU3903	19	26	8	42	74	60	74	92	79	1	19	29	22	7	2	554
d__Bacteria	k__norank_d__Bacteria	p__Acidobacteriota	c__Acidobacteriae	o__Subgroup_2	f__norank_o__Subgroup_2	g__norank_f__norank_o__Subgroup_2	s__uncultured_Acidobacteria_bacterium_g__norank_f__norank_o__Subgroup_2	OTU4599	26	19	3	7	28	17	9	8	162	0	25	18	6	12	3	343
d__Bacteria	k__norank_d__Bacteria	p__Proteobacteria	c__Gammaproteobacteria	o__Burkholderiales	f__Burkholderiaceae	g__unclassified_f__Burkholderiaceae	s__unclassified_f__Burkholderiaceae	OTU1491	0	0	0	0	0	3	0	0	0	0	0	0	0	0	0	3
d__Bacteria	k__norank_d__Bacteria	p__Proteobacteria	c__Gammaproteobacteria	o__unclassified_c__Gammaproteobacteria	f__unclassified_c__Gammaproteobacteria	g__unclassified_c__Gammaproteobacteria	s__unclassified_c__Gammaproteobacteria	OTU2312	0	0	2	27	1	5	3	2	8	0	4	0	0	0	0	52
d__Bacteria	k__norank_d__Bacteria	p__Proteobacteria	c__Alphaproteobacteria	o__Caulobacterales	f__Caulobacteraceae	g__Asticcacaulis	s__uncultured_bacterium_g__Asticcacaulis	OTU3514	5	18	8	7	11	1	0	8	1	2	68	0	4	4	1	138
d__Bacteria	k__norank_d__Bacteria	p__Actinobacteriota	c__Acidimicrobiia	o__Microtrichales	f__norank_o__Microtrichales	g__norank_f__norank_o__Microtrichales	s__wastewater_metagenome_g__norank_f__norank_o__Microtrichales	OTU5462	0	0	0	0	0	0	0	0	0	5	5	0	0	0	5	15
d__Bacteria	k__norank_d__Bacteria	p__Acidobacteriota	c__Acidobacteriae	o__Subgroup_2	f__norank_o__Subgroup_2	g__norank_f__norank_o__Subgroup_2	s__unclassified_g__norank_f__norank_o__Subgroup_2	OTU1486	3	12	3	1	29	18	11	8	37	1	8	7	10	12	4	164
d__Bacteria	k__norank_d__Bacteria	p__Actinobacteriota	c__Actinobacteria	o__Pseudonocardiales	f__Pseudonocardiaceae	g__unclassified_f__Pseudonocardiaceae	s__unclassified_f__Pseudonocardiaceae	OTU256	29	596	21	1083	20	192	63	46	22	2	4	3	47	9	4	2141
d__Bacteria	k__norank_d__Bacteria	p__Actinobacteriota	c__Acidimicrobiia	o__IMCC26256	f__norank_o__IMCC26256	g__norank_f__norank_o__IMCC26256	s__uncultured_Ferrimicrobium_sp._g__norank	OTU2963	20	42	13	4	12	5	0	4	8	51	41	20	1	27	37	285
d__Bacteria	k__norank_d__Bacteria	p__Dependentiae	c__Babeliae	o__Babeliales	f__Vermiphilaceae	g__norank_f__Vermiphilaceae	s__unclassified_g__norank_f__Vermiphilaceae	OTU2418	0	0	0	0	0	1	2	1	0	0	0	0	0	0	0	4
d__Bacteria	k__norank_d__Bacteria	p__Proteobacteria	c__Gammaproteobacteria	o__Xanthomonadales	f__Xanthomonadaceae	g__Lysobacter	s__unclassified_g__Lysobacter	OTU935	0	0	0	3	0	0	0	0	0	0	0	0	0	0	0	3
d__Bacteria	k__norank_d__Bacteria	p__Nitrospirota	c__Nitrospiria	o__Nitrospirales	f__Nitrospiraceae	g__Nitrospira	s__unclassified_g__Nitrospira	OTU1207	0	0	0	0	6	0	0	0	0	0	0	0	0	0	0	6
d__Bacteria	k__norank_d__Bacteria	p__Firmicutes	c__Bacilli	o__Thermoactinomycetales	f__Thermoactinomycetaceae	g__Novibacillus	s__Novibacillus_thermophilus	OTU3663	0	0	0	0	0	0	0	0	0	0	0	2	0	0	0	2
d__Bacteria	k__norank_d__Bacteria	p__unclassified_k__norank_d__Bacteria	c__unclassified_k__norank_d__Bacteria	o__unclassified_k__norank_d__Bacteria	f__unclassified_k__norank_d__Bacteria	g__unclassified_k__norank_d__Bacteria	s__unclassified_k__norank_d__Bacteria	OTU4433	0	0	0	0	0	0	0	0	0	4	3	0	0	0	3	10
d__Bacteria	k__norank_d__Bacteria	p__Verrucomicrobiota	c__Chlamydiae	o__Chlamydiales	f__Simkaniaceae	g__norank_f__Simkaniaceae	s__unclassified_g__norank_f__Simkaniaceae	OTU4651	0	0	1	0	2	0	1	0	0	0	0	0	0	0	0	4
d__Bacteria	k__norank_d__Bacteria	p__Acidobacteriota	c__Holophagae	o__Holophagales	f__Holophagaceae	g__Geothrix	s__unclassified_g__Geothrix	OTU2630	0	0	0	0	0	0	1	0	1	1	2	3	0	0	1	9
d__Bacteria	k__norank_d__Bacteria	p__Planctomycetota	c__Planctomycetes	o__Gemmatales	f__Gemmataceae	g__norank_f__Gemmataceae	s__uncultured_bacterium_g__norank_f__Gemmataceae	OTU5723	0	0	3	0	1	0	0	0	0	0	0	0	0	3	0	7
d__Bacteria	k__norank_d__Bacteria	p__Actinobacteriota	c__Actinobacteria	o__Micrococcales	f__Microbacteriaceae	g__unclassified_f__Microbacteriaceae	s__unclassified_f__Microbacteriaceae	OTU1733	3	0	0	0	0	0	0	0	0	0	0	0	0	0	0	3
d__Bacteria	k__norank_d__Bacteria	p__Chloroflexi	c__Chloroflexia	o__Chloroflexales	f__Roseiflexaceae	g__unclassified_f__Roseiflexaceae	s__unclassified_f__Roseiflexaceae	OTU365	0	0	2	0	0	0	0	0	0	0	0	0	0	0	1	3
d__Bacteria	k__norank_d__Bacteria	p__Proteobacteria	c__Gammaproteobacteria	o__Burkholderiales	f__Burkholderiaceae	g__Ralstonia	s__Ralstonia_pickettii	OTU2229	25	4	415	3	9	0	3	0	0	12	40	5	5	6	16	543
d__Bacteria	k__norank_d__Bacteria	p__Actinobacteriota	c__Actinobacteria	o__Catenulisporales	f__Actinospicaceae	g__Actinospica	s__uncultured_bacterium_g__Actinospica	OTU316	33	104	103	15	41	51	50	26	14	3	78	85	17	3	7	630
d__Bacteria	k__norank_d__Bacteria	p__Proteobacteria	c__Gammaproteobacteria	o__Steroidobacterales	f__Steroidobacteraceae	g__norank_f__Steroidobacteraceae	s__uncultured_soil_bacterium_g__norank_f__Steroidobacteraceae	OTU5347	2	0	0	0	0	0	0	0	0	5	11	0	0	2	0	20
d__Bacteria	k__norank_d__Bacteria	p__Bacteroidota	c__Bacteroidia	o__Chitinophagales	f__Saprospiraceae	g__norank_f__Saprospiraceae	s__unclassified_g__norank_f__Saprospiraceae	OTU3089	0	0	0	0	0	0	0	0	0	5	0	0	0	0	0	5
d__Bacteria	k__norank_d__Bacteria	p__Actinobacteriota	c__Actinobacteria	o__Streptosporangiales	f__Streptosporangiaceae	g__Nonomuraea	s__unclassified_g__Nonomuraea	OTU2188	0	2	2	0	0	0	0	0	3	1	0	1	0	0	0	9
d__Bacteria	k__norank_d__Bacteria	p__Proteobacteria	c__Gammaproteobacteria	o__Burkholderiales	f__Burkholderiaceae	g__Limnobacter	s__metagenome_g__Limnobacter	OTU3212	0	0	0	2	0	0	0	0	1	1	0	0	0	0	0	4
d__Bacteria	k__norank_d__Bacteria	p__Elusimicrobiota	c__Lineage_IIa	o__norank_c__Lineage_IIa	f__norank_o__norank_c__Lineage_IIa	g__norank_f__norank_o__norank_c__Lineage_IIa	s__uncultured_bacterium_g__norank_f__norank_o__norank_c__Lineage_IIa	OTU2715	2	1	4	22	7	4	8	3	26	1	2	1	3	0	0	84
d__Bacteria	k__norank_d__Bacteria	p__Proteobacteria	c__Gammaproteobacteria	o__Xanthomonadales	f__Rhodanobacteraceae	g__Mizugakiibacter	s__uncultured_gamma_proteobacterium_g__Mizugakiibacter	OTU2071	0	2	0	0	0	0	5	0	0	0	1	0	0	0	0	8
d__Bacteria	k__norank_d__Bacteria	p__Planctomycetota	c__Planctomycetes	o__Gemmatales	f__Gemmataceae	g__norank_f__Gemmataceae	s__unclassified_g__norank_f__Gemmataceae	OTU1326	1	2	2	2	10	3	7	2	2	0	1	0	0	0	0	32
d__Bacteria	k__norank_d__Bacteria	p__Proteobacteria	c__Gammaproteobacteria	o__Burkholderiales	f__Nitrosomonadaceae	g__MND1	s__unclassified_g__MND1	OTU4809	1	1	3	0	2	0	0	0	0	47	11	4	0	4	13	86
d__Bacteria	k__norank_d__Bacteria	p__Acidobacteriota	c__Vicinamibacteria	o__Vicinamibacterales	f__Vicinamibacteraceae	g__norank_f__Vicinamibacteraceae	s__unclassified_g__norank_f__Vicinamibacteraceae	OTU687	8	3	7	0	0	0	0	0	0	0	0	0	3	1	1	23
d__Bacteria	k__norank_d__Bacteria	p__Chloroflexi	c__Ktedonobacteria	o__Ktedonobacterales	f__JG30-KF-AS9	g__norank_f__JG30-KF-AS9	s__uncultured_bacterium_g__norank_f__JG30-KF-AS9	OTU3940	3	27	10	6	9	11	2	14	8	41	33	110	3	47	2	326
d__Bacteria	k__norank_d__Bacteria	p__unclassified_k__norank_d__Bacteria	c__unclassified_k__norank_d__Bacteria	o__unclassified_k__norank_d__Bacteria	f__unclassified_k__norank_d__Bacteria	g__unclassified_k__norank_d__Bacteria	s__unclassified_k__norank_d__Bacteria	OTU4620	0	2	3	0	2	0	0	1	1	1	6	2	0	2	2	22
d__Bacteria	k__norank_d__Bacteria	p__Fusobacteriota	c__Fusobacteriia	o__Fusobacteriales	f__Leptotrichiaceae	g__Leptotrichia	s__Leptotrichia_sp._oral_taxon_498	OTU1665	0	0	0	0	0	0	0	0	0	0	3	0	0	0	0	3
d__Bacteria	k__norank_d__Bacteria	p__Proteobacteria	c__Gammaproteobacteria	o__Gammaproteobacteria_Incertae_Sedis	f__unclassified_o__Gammaproteobacteria_Incertae_Sedis	g__Candidatus_Ovatusbacter	s__uncultured_bacterium_g__Candidatus_Ovatusbacter	OTU1933	0	0	0	0	0	0	3	0	0	0	0	0	0	0	0	3
d__Bacteria	k__norank_d__Bacteria	p__Spirochaetota	c__Leptospirae	o__Leptospirales	f__Leptospiraceae	g__Leptospira	s__unclassified_g__Leptospira	OTU1045	0	0	0	1	0	1	0	0	0	0	0	0	0	0	0	2
d__Bacteria	k__norank_d__Bacteria	p__Verrucomicrobiota	c__Verrucomicrobiae	o__Verrucomicrobiales	f__Verrucomicrobiaceae	g__unclassified_f__Verrucomicrobiaceae	s__unclassified_f__Verrucomicrobiaceae	OTU2498	1	2	12	9	3	1	6	4	8	0	0	0	6	0	0	52
d__Bacteria	k__norank_d__Bacteria	p__Gemmatimonadota	c__Gemmatimonadetes	o__Gemmatimonadales	f__Gemmatimonadaceae	g__unclassified_f__Gemmatimonadaceae	s__unclassified_f__Gemmatimonadaceae	OTU1329	0	0	0	0	3	1	0	0	0	1	0	1	0	3	0	9
d__Bacteria	k__norank_d__Bacteria	p__Chloroflexi	c__Ktedonobacteria	o__Ktedonobacterales	f__JG30-KF-AS9	g__norank_f__JG30-KF-AS9	s__unclassified_g__norank_f__JG30-KF-AS9	OTU3680	1	2	3	8	3	13	5	5	7	0	1	2	1	0	0	51
d__Bacteria	k__norank_d__Bacteria	p__Proteobacteria	c__Alphaproteobacteria	o__Acetobacterales	f__Acetobacteraceae	g__norank_f__Acetobacteraceae	s__uncultured_bacterium_g__norank_f__Acetobacteraceae	OTU2029	38	67	17	70	39	136	85	80	110	2	7	8	36	25	0	720
d__Bacteria	k__norank_d__Bacteria	p__Dependentiae	c__Babeliae	o__Babeliales	f__UBA12411	g__norank_f__UBA12411	s__unclassified_g__norank_f__UBA12411	OTU1352	0	0	0	0	13	0	0	0	0	0	0	0	0	0	0	13
d__Bacteria	k__norank_d__Bacteria	p__Bacteroidota	c__Bacteroidia	o__Chitinophagales	f__Chitinophagaceae	g__Puia	s__unclassified_g__Puia	OTU5652	0	0	0	0	0	0	0	0	0	0	0	0	0	0	4	4
d__Bacteria	k__norank_d__Bacteria	p__Actinobacteriota	c__Acidimicrobiia	o__Microtrichales	f__norank_o__Microtrichales	g__norank_f__norank_o__Microtrichales	s__uncultured_bacterium_g__norank_f__norank_o__Microtrichales	OTU3194	0	0	0	0	0	0	0	0	0	4	0	0	0	0	0	4
d__Bacteria	k__norank_d__Bacteria	p__Verrucomicrobiota	c__Verrucomicrobiae	o__Chthoniobacterales	f__Chthoniobacteraceae	g__unclassified_f__Chthoniobacteraceae	s__unclassified_f__Chthoniobacteraceae	OTU6048	0	0	0	0	0	0	0	0	0	0	1	0	0	0	0	1
d__Bacteria	k__norank_d__Bacteria	p__Verrucomicrobiota	c__Verrucomicrobiae	o__Pedosphaerales	f__Pedosphaeraceae	g__unclassified_f__Pedosphaeraceae	s__unclassified_f__Pedosphaeraceae	OTU1897	0	0	1	1	4	0	19	1	21	0	0	0	3	0	0	50
d__Bacteria	k__norank_d__Bacteria	p__WPS-2	c__norank_p__WPS-2	o__norank_c__norank_p__WPS-2	f__norank_o__norank_c__norank_p__WPS-2	g__norank_f__norank_o__norank_c__norank_p__WPS-2	s__unclassified_g__norank_f__norank_o__norank_c__norank_p__WPS-2	OTU6202	20	25	49	217	133	45	184	186	203	1	1	9	81	2	6	1162
d__Bacteria	k__norank_d__Bacteria	p__Proteobacteria	c__Alphaproteobacteria	o__Rhizobiales	f__Beijerinckiaceae	g__Roseiarcus	s__unclassified_g__Roseiarcus	OTU1892	41	96	47	116	347	222	474	212	161	7	25	57	102	36	32	1975
d__Bacteria	k__norank_d__Bacteria	p__Proteobacteria	c__Gammaproteobacteria	o__Xanthomonadales	f__Rhodanobacteraceae	g__Rhodanobacter	s__uncultured_Xanthomonadaceae_bacterium_g__Rhodanobacter	OTU1552	45	47	40	23	12	52	2	19	23	12	18	108	4	52	7	464
d__Bacteria	k__norank_d__Bacteria	p__Bacteroidota	c__Bacteroidia	o__Chitinophagales	f__37-13	g__norank_f__37-13	s__unclassified_g__norank_f__37-13	OTU3425	0	0	0	0	0	0	0	0	0	3	3	0	0	0	1	7
d__Bacteria	k__norank_d__Bacteria	p__Firmicutes	c__Clostridia	o__Clostridia_UCG-014	f__norank_o__Clostridia_UCG-014	g__norank_f__norank_o__Clostridia_UCG-014	s__unclassified_g__norank_f__norank_o__Clostridia_UCG-014	OTU39	2	0	0	0	4	0	2	0	0	0	0	0	0	0	0	8
d__Bacteria	k__norank_d__Bacteria	p__Armatimonadota	c__Fimbriimonadia	o__Fimbriimonadales	f__Fimbriimonadaceae	g__norank_f__Fimbriimonadaceae	s__unclassified_g__norank_f__Fimbriimonadaceae	OTU5803	0	1	1	2	4	2	2	7	4	2	0	0	1	2	0	28
d__Bacteria	k__norank_d__Bacteria	p__Patescibacteria	c__Saccharimonadia	o__Saccharimonadales	f__S32	g__TM7	s__uncultured_Candidatus_Saccharibacteria_bacterium_g__TM7	OTU2181	1	3	0	0	1	0	29	1	8	0	0	0	1	0	1	45
d__Bacteria	k__norank_d__Bacteria	p__Chloroflexi	c__KD4-96	o__norank_c__KD4-96	f__norank_o__norank_c__KD4-96	g__norank_f__norank_o__norank_c__KD4-96	s__uncultured_bacterium_g__norank_f__norank_o__norank_c__KD4-96	OTU149	20	11	10	1	6	0	3	0	5	35	27	12	2	8	91	231
d__Bacteria	k__norank_d__Bacteria	p__Planctomycetota	c__Phycisphaerae	o__Tepidisphaerales	f__WD2101_soil_group	g__norank_f__WD2101_soil_group	s__uncultured_bacterium_g__norank_f__WD2101_soil_group	OTU3712	0	0	0	1	0	0	0	0	0	0	0	0	0	0	0	1
d__Bacteria	k__norank_d__Bacteria	p__Bacteroidota	c__Bacteroidia	o__Cytophagales	f__Microscillaceae	g__norank_f__Microscillaceae	s__unclassified_g__norank_f__Microscillaceae	OTU3431	1	1	2	0	0	0	2	0	0	18	13	0	0	0	4	41
d__Bacteria	k__norank_d__Bacteria	p__Bdellovibrionota	c__Bdellovibrionia	o__Bdellovibrionales	f__Bdellovibrionaceae	g__Bdellovibrio	s__uncultured_bacterium_g__Bdellovibrio	OTU3667	0	0	0	0	0	0	0	0	0	1	0	2	0	0	0	3
d__Bacteria	k__norank_d__Bacteria	p__Bdellovibrionota	c__Oligoflexia	o__0319-6G20	f__norank_o__0319-6G20	g__norank_f__norank_o__0319-6G20	s__unclassified_g__norank_f__norank_o__0319-6G20	OTU1864	0	0	0	2	0	0	1	0	0	0	0	0	0	0	0	3
d__Bacteria	k__norank_d__Bacteria	p__Elusimicrobiota	c__Lineage_IIa	o__norank_c__Lineage_IIa	f__norank_o__norank_c__Lineage_IIa	g__norank_f__norank_o__norank_c__Lineage_IIa	s__unclassified_g__norank_f__norank_o__norank_c__Lineage_IIa	OTU6324	0	2	0	1	1	1	1	0	1	0	0	0	0	1	0	8
d__Bacteria	k__norank_d__Bacteria	p__Proteobacteria	c__Gammaproteobacteria	o__Steroidobacterales	f__Steroidobacteraceae	g__Steroidobacter	s__unclassified_g__Steroidobacter	OTU3258	0	0	0	0	0	0	0	0	0	3	2	0	0	0	1	6
d__Bacteria	k__norank_d__Bacteria	p__Planctomycetota	c__Planctomycetes	o__Isosphaerales	f__Isosphaeraceae	g__unclassified_f__Isosphaeraceae	s__unclassified_f__Isosphaeraceae	OTU3605	0	2	1	1	3	0	4	2	1	0	0	3	0	0	0	17
d__Bacteria	k__norank_d__Bacteria	p__Verrucomicrobiota	c__Chlamydiae	o__Chlamydiales	f__cvE6	g__norank_f__cvE6	s__unclassified_g__norank_f__cvE6	OTU6554	0	0	0	0	0	0	0	0	2	0	0	0	0	0	0	2
d__Bacteria	k__norank_d__Bacteria	p__Proteobacteria	c__Gammaproteobacteria	o__Diplorickettsiales	f__Diplorickettsiaceae	g__norank_f__Diplorickettsiaceae	s__unclassified_g__norank_f__Diplorickettsiaceae	OTU5083	0	0	0	0	0	0	0	0	0	0	0	0	9	0	0	9
d__Bacteria	k__norank_d__Bacteria	p__Actinobacteriota	c__Actinobacteria	o__Corynebacteriales	f__Nocardiaceae	g__Nocardia	s__Nocardia_niigatensis	OTU4284	0	0	2	1	1	5	0	3	2	7	7	6	0	0	2	36
d__Bacteria	k__norank_d__Bacteria	p__Firmicutes	c__Bacilli	o__Paenibacillales	f__Paenibacillaceae	g__Paenibacillus	s__unclassified_g__Paenibacillus	OTU352	0	0	3	0	0	0	0	0	1	1	2	3	0	0	0	10
d__Bacteria	k__norank_d__Bacteria	p__Acidobacteriota	c__Acidobacteriae	o__Subgroup_2	f__norank_o__Subgroup_2	g__norank_f__norank_o__Subgroup_2	s__uncultured_bacterium_g__norank_f__norank_o__Subgroup_2	OTU3964	0	0	0	0	0	0	5	0	0	0	0	1	0	0	0	6
d__Bacteria	k__norank_d__Bacteria	p__Proteobacteria	c__Alphaproteobacteria	o__Rhizobiales	f__unclassified_o__Rhizobiales	g__unclassified_o__Rhizobiales	s__unclassified_o__Rhizobiales	OTU4498	4	1	2	0	1	1	0	9	1	24	11	1	2	8	17	82
d__Bacteria	k__norank_d__Bacteria	p__Actinobacteriota	c__Thermoleophilia	o__Gaiellales	f__norank_o__Gaiellales	g__norank_f__norank_o__Gaiellales	s__uncultured_soil_bacterium_g__norank_f__norank_o__Gaiellales	OTU5712	0	0	1	0	0	0	0	0	0	4	0	2	0	2	1	10
d__Bacteria	k__norank_d__Bacteria	p__Verrucomicrobiota	c__Chlamydiae	o__Chlamydiales	f__Parachlamydiaceae	g__Neochlamydia	s__endosymbiont_of_Naegleria_clarki	OTU1799	0	0	0	0	1	0	0	0	0	0	0	0	0	0	0	1
d__Bacteria	k__norank_d__Bacteria	p__Bacteroidota	c__Bacteroidia	o__Cytophagales	f__Amoebophilaceae	g__Candidatus_Amoebophilus	s__uncultured_bacterium_g__Candidatus_Amoebophilus	OTU6195	0	0	1	1	0	3	0	0	0	0	0	0	1	0	0	6
d__Bacteria	k__norank_d__Bacteria	p__Bdellovibrionota	c__Oligoflexia	o__0319-6G20	f__norank_o__0319-6G20	g__norank_f__norank_o__0319-6G20	s__unclassified_g__norank_f__norank_o__0319-6G20	OTU6124	0	0	0	0	0	0	0	0	0	0	0	0	0	1	1	2
d__Bacteria	k__norank_d__Bacteria	p__Acidobacteriota	c__Vicinamibacteria	o__Vicinamibacterales	f__norank_o__Vicinamibacterales	g__norank_f__norank_o__Vicinamibacterales	s__uncultured_Acidobacteria_bacterium_g__norank_f__norank_o__Vicinamibacterales	OTU483	10	0	24	0	4	0	0	0	2	11	13	1	0	2	4	71
d__Bacteria	k__norank_d__Bacteria	p__Patescibacteria	c__Saccharimonadia	o__Saccharimonadales	f__unclassified_o__Saccharimonadales	g__unclassified_o__Saccharimonadales	s__unclassified_o__Saccharimonadales	OTU1667	0	0	1	0	0	0	0	0	0	0	0	0	0	0	0	1
d__Bacteria	k__norank_d__Bacteria	p__Proteobacteria	c__Gammaproteobacteria	o__Burkholderiales	f__Rhodocyclaceae	g__unclassified_f__Rhodocyclaceae	s__unclassified_f__Rhodocyclaceae	OTU6308	0	0	2	0	0	0	0	0	1	0	0	0	0	0	0	3
d__Bacteria	k__norank_d__Bacteria	p__Myxococcota	c__Polyangia	o__mle1-27	f__norank_o__mle1-27	g__norank_f__norank_o__mle1-27	s__unclassified_g__norank_f__norank_o__mle1-27	OTU69	5	0	0	0	0	0	0	0	0	0	0	0	0	0	0	5
d__Bacteria	k__norank_d__Bacteria	p__Bacteroidota	c__Bacteroidia	o__Cytophagales	f__Amoebophilaceae	g__Candidatus_Amoebophilus	s__uncultured_Bacteroidetes_bacterium_g__Candidatus_Amoebophilus	OTU5014	4	1	0	0	5	0	0	0	0	0	0	0	7	0	0	17
d__Bacteria	k__norank_d__Bacteria	p__Bacteroidota	c__Bacteroidia	o__Chitinophagales	f__Chitinophagaceae	g__Flavisolibacter	s__uncultured_bacterium_g__Flavisolibacter	OTU707	3	0	6	0	0	0	0	0	0	6	0	1	0	0	5	21
d__Bacteria	k__norank_d__Bacteria	p__Proteobacteria	c__Gammaproteobacteria	o__Xanthomonadales	f__Xanthomonadaceae	g__Lysobacter	s__unclassified_g__Lysobacter	OTU2915	0	0	10	0	0	0	0	0	0	41	10	1	0	1	9	72
d__Bacteria	k__norank_d__Bacteria	p__Chloroflexi	c__Anaerolineae	o__SBR1031	f__norank_o__SBR1031	g__norank_f__norank_o__SBR1031	s__unclassified_g__norank_f__norank_o__SBR1031	OTU3266	0	0	0	0	0	0	0	0	0	0	3	0	0	0	0	3
d__Bacteria	k__norank_d__Bacteria	p__Dependentiae	c__Babeliae	o__Babeliales	f__Vermiphilaceae	g__norank_f__Vermiphilaceae	s__uncultured_bacterium_g__norank_f__Vermiphilaceae	OTU1320	0	0	0	0	5	0	0	0	1	0	0	0	0	0	0	6
d__Bacteria	k__norank_d__Bacteria	p__Bacteroidota	c__Bacteroidia	o__Chitinophagales	f__Chitinophagaceae	g__unclassified_f__Chitinophagaceae	s__unclassified_f__Chitinophagaceae	OTU793	0	0	3	0	0	0	0	2	0	0	0	0	0	0	0	5
d__Bacteria	k__norank_d__Bacteria	p__Chloroflexi	c__Ktedonobacteria	o__Ktedonobacterales	f__Ktedonobacteraceae	g__HSB_OF53-F07	s__uncultured_bacterium_g__HSB_OF53-F07	OTU4484	0	0	1	0	0	2	1	3	0	0	0	0	0	1	0	8
d__Bacteria	k__norank_d__Bacteria	p__Proteobacteria	c__Gammaproteobacteria	o__Burkholderiales	f__Comamonadaceae	g__Ramlibacter	s__unclassified_g__Ramlibacter	OTU6183	9	2	24	4	0	1	1	5	1	50	30	21	6	1	18	173
d__Bacteria	k__norank_d__Bacteria	p__Chloroflexi	c__TK10	o__norank_c__TK10	f__norank_o__norank_c__TK10	g__norank_f__norank_o__norank_c__TK10	s__uncultured_bacterium_g__norank_f__norank_o__norank_c__TK10	OTU112	19	8	7	13	7	30	6	29	35	0	0	2	2	2	1	161
d__Bacteria	k__norank_d__Bacteria	p__Verrucomicrobiota	c__Verrucomicrobiae	o__Chthoniobacterales	f__Chthoniobacteraceae	g__Chthoniobacter	s__uncultured_bacterium_g__Chthoniobacter	OTU1841	1	1	5	5	0	2	47	5	6	0	5	4	12	0	0	93
d__Bacteria	k__norank_d__Bacteria	p__Bdellovibrionota	c__Oligoflexia	o__0319-6G20	f__norank_o__0319-6G20	g__norank_f__norank_o__0319-6G20	s__unclassified_g__norank_f__norank_o__0319-6G20	OTU345	0	0	6	0	0	0	0	0	0	0	0	0	0	0	0	6
d__Bacteria	k__norank_d__Bacteria	p__Firmicutes	c__Bacilli	o__Alicyclobacillales	f__Alicyclobacillaceae	g__Alicyclobacillus	s__uncultured_bacterium_g__Alicyclobacillus	OTU2659	0	1	1	0	0	1	2	1	1	0	0	0	3	0	0	10
d__Bacteria	k__norank_d__Bacteria	p__Actinobacteriota	c__Actinobacteria	o__Actinomycetales	f__Actinomycetaceae	g__Actinomyces	s__Actinomyces_sp._oral_taxon_414	OTU3527	0	0	0	0	0	0	0	0	0	0	24	0	0	0	0	24
d__Bacteria	k__norank_d__Bacteria	p__Acidobacteriota	c__Acidobacteriae	o__Acidobacteriales	f__norank_o__Acidobacteriales	g__norank_f__norank_o__Acidobacteriales	s__unclassified_g__norank_f__norank_o__Acidobacteriales	OTU4667	0	0	0	2	0	4	6	2	1	0	5	0	2	5	0	27
d__Bacteria	k__norank_d__Bacteria	p__Planctomycetota	c__Planctomycetes	o__Gemmatales	f__Gemmataceae	g__norank_f__Gemmataceae	s__unclassified_g__norank_f__Gemmataceae	OTU6526	0	0	0	0	1	2	0	0	0	0	0	0	1	0	0	4
d__Bacteria	k__norank_d__Bacteria	p__unclassified_k__norank_d__Bacteria	c__unclassified_k__norank_d__Bacteria	o__unclassified_k__norank_d__Bacteria	f__unclassified_k__norank_d__Bacteria	g__unclassified_k__norank_d__Bacteria	s__unclassified_k__norank_d__Bacteria	OTU3184	0	0	0	0	0	0	0	0	0	2	0	0	0	0	0	2
d__Bacteria	k__norank_d__Bacteria	p__Chloroflexi	c__TK10	o__norank_c__TK10	f__norank_o__norank_c__TK10	g__norank_f__norank_o__norank_c__TK10	s__uncultured_Chloroflexi_bacterium_g__norank_f__norank_o__norank_c__TK10	OTU813	0	2	1	0	0	0	0	0	0	4	3	1	0	1	2	14
d__Bacteria	k__norank_d__Bacteria	p__Planctomycetota	c__Planctomycetes	o__Gemmatales	f__Gemmataceae	g__norank_f__Gemmataceae	s__unclassified_g__norank_f__Gemmataceae	OTU952	0	0	0	2	0	0	0	0	0	0	0	0	0	0	0	2
d__Bacteria	k__norank_d__Bacteria	p__Planctomycetota	c__Planctomycetes	o__Gemmatales	f__Gemmataceae	g__norank_f__Gemmataceae	s__unclassified_g__norank_f__Gemmataceae	OTU955	0	0	0	5	0	0	0	1	0	0	0	0	0	0	0	6
d__Bacteria	k__norank_d__Bacteria	p__Acidobacteriota	c__Blastocatellia	o__11-24	f__norank_o__11-24	g__norank_f__norank_o__11-24	s__Acidobacteria_bacterium_Ellin7246	OTU4417	0	1	0	0	2	5	2	3	2	0	0	0	3	5	1	24
d__Bacteria	k__norank_d__Bacteria	p__Acidobacteriota	c__Thermoanaerobaculia	o__Thermoanaerobaculales	f__Thermoanaerobaculaceae	g__Subgroup_10	s__unclassified_g__Subgroup_10	OTU5872	3	0	0	0	0	0	0	0	0	0	0	0	0	0	0	3
d__Bacteria	k__norank_d__Bacteria	p__Verrucomicrobiota	c__Chlamydiae	o__Chlamydiales	f__Simkaniaceae	g__norank_f__Simkaniaceae	s__unclassified_g__norank_f__Simkaniaceae	OTU3716	0	0	0	0	0	0	0	1	0	0	0	0	0	0	0	1
d__Bacteria	k__norank_d__Bacteria	p__Planctomycetota	c__Planctomycetes	o__Gemmatales	f__Gemmataceae	g__norank_f__Gemmataceae	s__unclassified_g__norank_f__Gemmataceae	OTU2673	2	0	0	5	1	3	10	10	11	0	0	0	1	2	0	45
d__Bacteria	k__norank_d__Bacteria	p__Patescibacteria	c__Microgenomatia	o__Candidatus_Levybacteria	f__norank_o__Candidatus_Levybacteria	g__norank_f__norank_o__Candidatus_Levybacteria	s__unclassified_g__norank_f__norank_o__Candidatus_Levybacteria	OTU928	0	0	0	2	0	0	0	0	0	0	0	1	0	0	0	3
d__Bacteria	k__norank_d__Bacteria	p__Dependentiae	c__Babeliae	o__Babeliales	f__Vermiphilaceae	g__norank_f__Vermiphilaceae	s__unclassified_g__norank_f__Vermiphilaceae	OTU4830	3	0	0	0	0	0	0	0	0	1	0	0	10	0	0	14
d__Bacteria	k__norank_d__Bacteria	p__Planctomycetota	c__Planctomycetes	o__Gemmatales	f__Gemmataceae	g__norank_f__Gemmataceae	s__uncultured_bacterium_g__norank_f__Gemmataceae	OTU532	0	0	2	0	0	0	0	0	0	0	0	0	0	0	0	2
d__Bacteria	k__norank_d__Bacteria	p__Verrucomicrobiota	c__Verrucomicrobiae	o__Chthoniobacterales	f__Chthoniobacteraceae	g__Chthoniobacter	s__uncultured_bacterium_g__Chthoniobacter	OTU1424	0	2	0	0	0	4	5	0	0	0	0	0	0	0	0	11
d__Bacteria	k__norank_d__Bacteria	p__Fusobacteriota	c__Fusobacteriia	o__Fusobacteriales	f__Leptotrichiaceae	g__Leptotrichia	s__uncultured_bacterium_g__Leptotrichia	OTU3460	0	0	0	1	1	0	0	0	0	0	12	0	0	0	0	14
d__Bacteria	k__norank_d__Bacteria	p__Verrucomicrobiota	c__Verrucomicrobiae	o__Methylacidiphilales	f__Methylacidiphilaceae	g__norank_f__Methylacidiphilaceae	s__uncultured_bacterium_g__norank_f__Methylacidiphilaceae	OTU5027	0	0	0	0	0	0	0	1	0	0	0	0	4	1	0	6
d__Bacteria	k__norank_d__Bacteria	p__Acidobacteriota	c__Acidobacteriae	o__Acidobacteriales	f__Acidobacteriaceae_Subgroup_1	g__Acidipila	s__uncultured_Acidobacteria_bacterium_g__Acidipila	OTU6528	19	21	19	87	95	61	174	110	62	3	7	47	95	4	13	817
d__Bacteria	k__norank_d__Bacteria	p__Proteobacteria	c__Gammaproteobacteria	o__Diplorickettsiales	f__Diplorickettsiaceae	g__Aquicella	s__unclassified_g__Aquicella	OTU3264	0	0	0	0	0	0	0	0	0	0	4	0	0	0	0	4
d__Bacteria	k__norank_d__Bacteria	p__unclassified_k__norank_d__Bacteria	c__unclassified_k__norank_d__Bacteria	o__unclassified_k__norank_d__Bacteria	f__unclassified_k__norank_d__Bacteria	g__unclassified_k__norank_d__Bacteria	s__unclassified_k__norank_d__Bacteria	OTU3236	0	0	0	0	0	0	0	0	0	1	0	0	0	0	0	1
d__Bacteria	k__norank_d__Bacteria	p__Bdellovibrionota	c__Oligoflexia	o__0319-6G20	f__norank_o__0319-6G20	g__norank_f__norank_o__0319-6G20	s__unclassified_g__norank_f__norank_o__0319-6G20	OTU4095	0	2	0	0	2	0	1	1	0	0	0	1	0	0	0	7
d__Bacteria	k__norank_d__Bacteria	p__Patescibacteria	c__Parcubacteria	o__unclassified_c__Parcubacteria	f__unclassified_c__Parcubacteria	g__unclassified_c__Parcubacteria	s__unclassified_c__Parcubacteria	OTU1201	0	0	0	0	3	0	0	0	0	0	0	0	0	0	0	3
d__Bacteria	k__norank_d__Bacteria	p__Acidobacteriota	c__Acidobacteriae	o__Solibacterales	f__Solibacteraceae	g__Candidatus_Solibacter	s__unclassified_g__Candidatus_Solibacter	OTU4904	2	11	1	0	30	23	12	8	29	25	57	17	7	32	2	256
d__Bacteria	k__norank_d__Bacteria	p__Myxococcota	c__Polyangia	o__Polyangiales	f__Polyangiaceae	g__Labilithrix	s__Labilithrix_luteola	OTU1394	1	1	1	2	0	2	1	0	2	2	0	0	2	1	1	16
d__Bacteria	k__norank_d__Bacteria	p__Verrucomicrobiota	c__Chlamydiae	o__Chlamydiales	f__Simkaniaceae	g__unclassified_f__Simkaniaceae	s__unclassified_f__Simkaniaceae	OTU4643	0	0	0	0	0	0	0	0	2	0	0	0	0	0	0	2
d__Bacteria	k__norank_d__Bacteria	p__Bacteroidota	c__Bacteroidia	o__Cytophagales	f__Hymenobacteraceae	g__Adhaeribacter	s__uncultured_soil_bacterium_g__Adhaeribacter	OTU2871	0	0	0	0	0	0	0	0	0	7	6	0	0	0	0	13
d__Bacteria	k__norank_d__Bacteria	p__Bacteroidota	c__Bacteroidia	o__Cytophagales	f__Microscillaceae	g__norank_f__Microscillaceae	s__unclassified_g__norank_f__Microscillaceae	OTU4165	0	1	0	1	0	0	0	0	1	2	3	0	0	0	0	8
d__Bacteria	k__norank_d__Bacteria	p__Proteobacteria	c__Gammaproteobacteria	o__Xanthomonadales	f__Rhodanobacteraceae	g__Dokdonella	s__unclassified_g__Dokdonella	OTU3691	0	0	0	0	0	0	0	0	0	0	0	1	0	0	0	1
d__Bacteria	k__norank_d__Bacteria	p__Dependentiae	c__Babeliae	o__Babeliales	f__UBA12409	g__norank_f__UBA12409	s__uncultured_bacterium_g__norank_f__UBA12409	OTU2541	0	0	0	1	0	0	0	2	0	0	0	0	0	0	0	3
d__Bacteria	k__norank_d__Bacteria	p__Firmicutes	c__Bacilli	o__Bacillales	f__unclassified_o__Bacillales	g__unclassified_o__Bacillales	s__unclassified_o__Bacillales	OTU4982	0	0	0	0	0	0	0	0	0	0	0	0	2	0	0	2
d__Bacteria	k__norank_d__Bacteria	p__Firmicutes	c__Clostridia	o__Lachnospirales	f__Lachnospiraceae	g__Anaerostipes	s__Anaerostipes_hadrus_g__Anaerostipes	OTU5133	0	0	1	0	0	0	0	0	0	0	0	0	0	0	0	1
d__Bacteria	k__norank_d__Bacteria	p__Cyanobacteria	c__Vampirivibrionia	o__Vampirovibrionales	f__Vampirovibrionaceae	g__Vampirovibrio	s__uncultured_bacterium_g__Vampirovibrio	OTU372	0	0	9	0	0	0	0	1	1	0	0	12	0	1	0	24
d__Bacteria	k__norank_d__Bacteria	p__Myxococcota	c__Polyangia	o__Polyangiales	f__Polyangiaceae	g__Sorangium	s__uncultured_bacterium_g__Sorangium	OTU3210	0	0	0	0	0	0	0	0	0	6	0	0	0	2	1	9
d__Bacteria	k__norank_d__Bacteria	p__Armatimonadota	c__Chthonomonadetes	o__Chthonomonadales	f__Chthonomonadaceae	g__Chthonomonas	s__unclassified_g__Chthonomonas	OTU4507	0	0	0	6	0	2	1	0	9	0	0	0	0	0	0	18
d__Bacteria	k__norank_d__Bacteria	p__Proteobacteria	c__Alphaproteobacteria	o__unclassified_c__Alphaproteobacteria	f__unclassified_c__Alphaproteobacteria	g__unclassified_c__Alphaproteobacteria	s__unclassified_c__Alphaproteobacteria	OTU5624	0	0	0	0	0	0	0	0	0	2	4	0	0	0	1	7
d__Bacteria	k__norank_d__Bacteria	p__Sumerlaeota	c__Sumerlaeia	o__Sumerlaeales	f__Sumerlaeaceae	g__Sumerlaea	s__unclassified_g__Sumerlaea	OTU544	0	0	3	0	0	0	0	0	0	0	0	0	0	0	0	3
d__Bacteria	k__norank_d__Bacteria	p__Bacteroidota	c__Bacteroidia	o__Cytophagales	f__Microscillaceae	g__norank_f__Microscillaceae	s__uncultured_bacterium_g__norank_f__Microscillaceae	OTU5492	0	0	0	0	0	0	1	0	1	0	0	0	0	3	2	7
d__Bacteria	k__norank_d__Bacteria	p__Gemmatimonadota	c__Gemmatimonadetes	o__Gemmatimonadales	f__Gemmatimonadaceae	g__Roseisolibacter	s__uncultured_Gemmatimonadetes_bacterium_g__Roseisolibacter	OTU2265	2	0	1	4	1	6	6	21	12	0	0	0	5	4	0	62
d__Bacteria	k__norank_d__Bacteria	p__WPS-2	c__norank_p__WPS-2	o__norank_c__norank_p__WPS-2	f__norank_o__norank_c__norank_p__WPS-2	g__norank_f__norank_o__norank_c__norank_p__WPS-2	s__uncultured_bacterium_g__norank_f__norank_o__norank_c__norank_p__WPS-2	OTU732	0	0	4	0	0	0	0	1	0	0	0	0	0	0	0	5
d__Bacteria	k__norank_d__Bacteria	p__Proteobacteria	c__Alphaproteobacteria	o__unclassified_c__Alphaproteobacteria	f__unclassified_c__Alphaproteobacteria	g__unclassified_c__Alphaproteobacteria	s__unclassified_c__Alphaproteobacteria	OTU765	0	0	0	0	0	0	0	0	0	0	5	0	0	0	0	5
d__Bacteria	k__norank_d__Bacteria	p__Acidobacteriota	c__Blastocatellia	o__11-24	f__norank_o__11-24	g__norank_f__norank_o__11-24	s__unclassified_g__norank_f__norank_o__11-24	OTU3754	0	0	0	0	0	0	0	0	0	0	0	0	0	1	0	1
d__Bacteria	k__norank_d__Bacteria	p__Cyanobacteria	c__Vampirivibrionia	o__Obscuribacterales	f__Obscuribacteraceae	g__norank_f__Obscuribacteraceae	s__uncultured_bacterium_g__norank_f__Obscuribacteraceae	OTU2081	0	3	0	0	1	1	4	0	0	0	0	0	0	0	0	9
d__Bacteria	k__norank_d__Bacteria	p__Fusobacteriota	c__Fusobacteriia	o__Fusobacteriales	f__Leptotrichiaceae	g__norank_f__Leptotrichiaceae	s__unclassified_g__norank_f__Leptotrichiaceae	OTU37	2	0	0	0	0	0	0	0	0	0	0	0	0	0	0	2
d__Bacteria	k__norank_d__Bacteria	p__unclassified_k__norank_d__Bacteria	c__unclassified_k__norank_d__Bacteria	o__unclassified_k__norank_d__Bacteria	f__unclassified_k__norank_d__Bacteria	g__unclassified_k__norank_d__Bacteria	s__unclassified_k__norank_d__Bacteria	OTU25	2	0	0	0	0	0	0	0	1	0	0	0	0	1	0	4
d__Bacteria	k__norank_d__Bacteria	p__Bacteroidota	c__Bacteroidia	o__Sphingobacteriales	f__AKYH767	g__norank_f__AKYH767	s__metagenome_g__norank_f__AKYH767	OTU4760	0	0	0	0	3	0	0	0	0	0	0	0	0	0	0	3
d__Bacteria	k__norank_d__Bacteria	p__Acidobacteriota	c__Vicinamibacteria	o__Vicinamibacterales	f__norank_o__Vicinamibacterales	g__norank_f__norank_o__Vicinamibacterales	s__uncultured_bacterium_92	OTU6151	43	0	1	0	5	0	0	0	4	3	0	4	0	4	2	66
d__Bacteria	k__norank_d__Bacteria	p__Bdellovibrionota	c__Bdellovibrionia	o__Bdellovibrionales	f__Bdellovibrionaceae	g__Bdellovibrio	s__uncultured_bacterium_g__Bdellovibrio	OTU4050	0	0	2	0	0	0	0	0	0	0	0	0	2	0	0	4
d__Bacteria	k__norank_d__Bacteria	p__Proteobacteria	c__Alphaproteobacteria	o__Acetobacterales	f__Acetobacteraceae	g__norank_f__Acetobacteraceae	s__uncultured_bacterium_g__norank_f__Acetobacteraceae	OTU6049	0	1	0	0	0	0	0	0	0	8	7	0	0	0	0	16
d__Bacteria	k__norank_d__Bacteria	p__Firmicutes	c__Negativicutes	o__Veillonellales-Selenomonadales	f__Veillonellaceae	g__Dialister	s__Dialister_invisus_DSM_15470	OTU1180	0	1	2	0	1	0	0	0	0	0	0	0	0	0	0	4
d__Bacteria	k__norank_d__Bacteria	p__Patescibacteria	c__Saccharimonadia	o__Saccharimonadales	f__norank_o__Saccharimonadales	g__norank_f__norank_o__Saccharimonadales	s__uncultured_bacterium_g__norank_f__norank_o__Saccharimonadales	OTU514	0	0	16	0	0	0	1	0	0	0	0	0	0	0	0	17
d__Bacteria	k__norank_d__Bacteria	p__Patescibacteria	c__Saccharimonadia	o__Saccharimonadales	f__norank_o__Saccharimonadales	g__norank_f__norank_o__Saccharimonadales	s__unclassified_g__norank_f__norank_o__Saccharimonadales	OTU5858	0	0	0	0	0	0	0	0	0	0	0	0	0	0	6	6
d__Bacteria	k__norank_d__Bacteria	p__Myxococcota	c__Polyangia	o__Blfdi19	f__norank_o__Blfdi19	g__norank_f__norank_o__Blfdi19	s__unclassified_g__norank_f__norank_o__Blfdi19	OTU3234	2	1	0	0	0	0	0	0	0	3	0	0	0	0	0	6
d__Bacteria	k__norank_d__Bacteria	p__Proteobacteria	c__Alphaproteobacteria	o__Rhizobiales	f__Xanthobacteraceae	g__Bradyrhizobium	s__unclassified_g__Bradyrhizobium	OTU1140	161	172	296	73	41	114	26	99	25	58	56	50	24	82	112	1389
d__Bacteria	k__norank_d__Bacteria	p__Firmicutes	c__Bacilli	o__Thermoactinomycetales	f__Thermoactinomycetaceae	g__unclassified_f__Thermoactinomycetaceae	s__unclassified_f__Thermoactinomycetaceae	OTU177	2	0	0	0	0	0	0	0	0	0	0	0	0	0	0	2
d__Bacteria	k__norank_d__Bacteria	p__Deinococcota	c__Deinococci	o__Deinococcales	f__Deinococcaceae	g__Deinococcus	s__unclassified_g__Deinococcus	OTU276	0	1	0	0	0	0	0	0	0	0	0	0	0	0	0	1
d__Bacteria	k__norank_d__Bacteria	p__Latescibacterota	c__norank_p__Latescibacterota	o__norank_c__norank_p__Latescibacterota	f__norank_o__norank_c__norank_p__Latescibacterota	g__norank_f__norank_o__norank_c__norank_p__Latescibacterota	s__unclassified_g__norank_f__norank_o__norank_c__norank_p__Latescibacterota	OTU5441	0	0	0	0	0	0	0	0	1	0	0	0	0	0	1	2
d__Bacteria	k__norank_d__Bacteria	p__Chloroflexi	c__Ktedonobacteria	o__Ktedonobacterales	f__Ktedonobacteraceae	g__1921-2	s__unclassified_g__1921-2	OTU3714	0	0	0	0	3	0	0	0	0	0	0	0	0	0	0	3
d__Bacteria	k__norank_d__Bacteria	p__Proteobacteria	c__Gammaproteobacteria	o__Gammaproteobacteria_Incertae_Sedis	f__unclassified_o__Gammaproteobacteria_Incertae_Sedis	g__Acidibacter	s__uncultured_gamma_proteobacterium_g__Acidibacter	OTU6452	28	162	19	38	317	169	812	228	155	20	36	119	1043	48	6	3200
d__Bacteria	k__norank_d__Bacteria	p__Acidobacteriota	c__Acidobacteriae	o__Subgroup_2	f__norank_o__Subgroup_2	g__norank_f__norank_o__Subgroup_2	s__unclassified_g__norank_f__norank_o__Subgroup_2	OTU1363	0	4	1	2	16	1	0	0	6	1	1	4	1	1	3	41
d__Bacteria	k__norank_d__Bacteria	p__Bacteroidota	c__Bacteroidia	o__Chitinophagales	f__Chitinophagaceae	g__norank_f__Chitinophagaceae	s__uncultured_Chitinophagaceae_bacterium_g__norank_f__Chitinophagaceae	OTU5618	22	9	19	1	1	0	3	0	4	37	25	5	0	59	31	216
d__Bacteria	k__norank_d__Bacteria	p__Dependentiae	c__Babeliae	o__Babeliales	f__Vermiphilaceae	g__norank_f__Vermiphilaceae	s__uncultured_bacterium_g__norank_f__Vermiphilaceae	OTU6492	0	1	0	0	1	0	2	0	0	0	0	0	11	0	0	15
d__Bacteria	k__norank_d__Bacteria	p__Chloroflexi	c__Ktedonobacteria	o__Ktedonobacterales	f__Ktedonobacteraceae	g__FCPS473	s__unclassified_g__FCPS473	OTU4867	0	3	0	0	0	0	0	0	0	0	0	0	5	0	0	8
d__Bacteria	k__norank_d__Bacteria	p__Proteobacteria	c__Alphaproteobacteria	o__Caulobacterales	f__Hyphomonadaceae	g__SWB02	s__uncultured_bacterium_g__SWB02	OTU5528	0	3	1	0	1	0	0	0	0	5	0	0	0	1	26	37
d__Bacteria	k__norank_d__Bacteria	p__Proteobacteria	c__Gammaproteobacteria	o__Gammaproteobacteria_Incertae_Sedis	f__unclassified_o__Gammaproteobacteria_Incertae_Sedis	g__Candidatus_Berkiella	s__uncultured_bacterium_g__Candidatus_Berkiella	OTU2375	0	0	0	0	0	1	0	0	0	0	0	0	0	0	0	1
d__Bacteria	k__norank_d__Bacteria	p__Bdellovibrionota	c__Oligoflexia	o__Oligoflexales	f__norank_o__Oligoflexales	g__Oligoflexus	s__unclassified_g__Oligoflexus	OTU1008	0	0	1	2	0	0	0	0	0	0	0	0	0	0	0	3
d__Bacteria	k__norank_d__Bacteria	p__Proteobacteria	c__Gammaproteobacteria	o__Legionellales	f__Legionellaceae	g__Legionella	s__unclassified_g__Legionella	OTU2268	1	2	0	3	8	0	1	1	4	0	0	0	6	0	1	27
d__Bacteria	k__norank_d__Bacteria	p__Patescibacteria	c__unclassified_p__Patescibacteria	o__unclassified_p__Patescibacteria	f__unclassified_p__Patescibacteria	g__unclassified_p__Patescibacteria	s__unclassified_p__Patescibacteria	OTU2746	0	0	0	0	1	0	0	0	4	0	0	0	0	0	0	5
d__Bacteria	k__norank_d__Bacteria	p__Acidobacteriota	c__Acidobacteriae	o__Acidobacteriales	f__norank_o__Acidobacteriales	g__norank_f__norank_o__Acidobacteriales	s__unclassified_g__norank_f__norank_o__Acidobacteriales	OTU1939	27	60	20	11	147	177	106	35	60	0	54	12	52	47	6	814
d__Bacteria	k__norank_d__Bacteria	p__Bdellovibrionota	c__Oligoflexia	o__0319-6G20	f__norank_o__0319-6G20	g__norank_f__norank_o__0319-6G20	s__unclassified_g__norank_f__norank_o__0319-6G20	OTU1674	0	0	0	3	0	0	1	1	2	0	0	1	0	0	0	8
d__Bacteria	k__norank_d__Bacteria	p__Actinobacteriota	c__Actinobacteria	o__Streptosporangiales	f__Nocardiopsaceae	g__Nocardiopsis	s__Nocardiopsis_flavescens	OTU5601	0	0	0	0	1	0	0	0	0	0	0	0	0	0	2	3
d__Bacteria	k__norank_d__Bacteria	p__Firmicutes	c__Bacilli	o__Erysipelotrichales	f__Erysipelatoclostridiaceae	g__Coprobacillus	s__Coprobacillus_cateniformis	OTU3434	0	0	0	0	0	0	0	0	0	0	2	0	0	0	0	2
d__Bacteria	k__norank_d__Bacteria	p__Bacteroidota	c__Bacteroidia	o__Chitinophagales	f__Chitinophagaceae	g__Edaphobaculum	s__unclassified_g__Edaphobaculum	OTU107	2	0	0	0	0	0	0	1	0	0	0	0	0	0	0	3
d__Bacteria	k__norank_d__Bacteria	p__Proteobacteria	c__Gammaproteobacteria	o__Gammaproteobacteria_Incertae_Sedis	f__unclassified_o__Gammaproteobacteria_Incertae_Sedis	g__Candidatus_Ovatusbacter	s__uncultured_bacterium_g__Candidatus_Ovatusbacter	OTU1162	0	0	0	0	2	0	0	0	0	0	0	0	0	0	0	2
d__Bacteria	k__norank_d__Bacteria	p__Patescibacteria	c__Saccharimonadia	o__Saccharimonadales	f__LWQ8	g__norank_f__LWQ8	s__uncultured_bacterium_g__norank_f__LWQ8	OTU1802	0	0	0	4	4	0	1	1	6	0	0	0	0	0	0	16
d__Bacteria	k__norank_d__Bacteria	p__Firmicutes	c__Bacilli	o__Entomoplasmatales	f__type_III	g__norank_f__type_III	s__uncultured_Mollicutes_bacterium_g__norank	OTU5234	0	0	0	0	0	0	0	0	0	0	0	0	0	2	0	2
d__Bacteria	k__norank_d__Bacteria	p__Firmicutes	c__Bacilli	o__Exiguobacterales	f__Exiguobacteraceae	g__Exiguobacterium	s__Exiguobacterium_indicum	OTU5122	0	0	1	0	0	0	0	0	0	0	0	0	0	0	0	1
d__Bacteria	k__norank_d__Bacteria	p__Bacteroidota	c__Bacteroidia	o__SM1A07	f__norank_o__SM1A07	g__norank_f__norank_o__SM1A07	s__uncultured_bacterium_g__norank_f__norank_o__SM1A07	OTU594	8	12	7	0	2	2	4	3	18	0	0	0	9	9	2	76
d__Bacteria	k__norank_d__Bacteria	p__Proteobacteria	c__Gammaproteobacteria	o__Diplorickettsiales	f__Diplorickettsiaceae	g__Aquicella	s__uncultured_bacterium_g__Aquicella	OTU2423	0	0	0	0	0	0	0	4	1	0	0	0	0	0	0	5
d__Bacteria	k__norank_d__Bacteria	p__Acidobacteriota	c__Acidobacteriae	o__norank_c__Acidobacteriae	f__norank_o__norank_c__Acidobacteriae	g__Paludibaculum	s__uncultured_Acidobacterium_sp._g__Paludibaculum	OTU2222	0	0	0	0	0	0	0	0	1	0	0	0	0	0	0	1
d__Bacteria	k__norank_d__Bacteria	p__Planctomycetota	c__Planctomycetes	o__Isosphaerales	f__Isosphaeraceae	g__norank_f__Isosphaeraceae	s__uncultured_bacterium_g__norank_f__Isosphaeraceae	OTU1729	0	0	2	2	0	4	0	1	2	0	0	1	1	0	0	13
d__Bacteria	k__norank_d__Bacteria	p__Myxococcota	c__Myxococcia	o__Myxococcales	f__Anaeromyxobacteraceae	g__Anaeromyxobacter	s__unclassified_g__Anaeromyxobacter	OTU6034	0	2	0	0	0	0	0	0	1	0	0	0	0	3	0	6
d__Bacteria	k__norank_d__Bacteria	p__Deinococcota	c__Deinococci	o__Deinococcales	f__Trueperaceae	g__Truepera	s__uncultured_bacterium_g__Truepera	OTU54	3	0	0	0	0	0	0	0	0	0	0	0	0	0	0	3
d__Bacteria	k__norank_d__Bacteria	p__Proteobacteria	c__Gammaproteobacteria	o__Burkholderiales	f__Methylophilaceae	g__Methylobacillus	s__uncultured_bacterium_g__Methylobacillus	OTU6460	14	10	16	23	12	24	70	0	1	2	7	2	7	0	4	192
d__Bacteria	k__norank_d__Bacteria	p__Armatimonadota	c__Armatimonadia	o__Armatimonadales	f__norank_o__Armatimonadales	g__norank_f__norank_o__Armatimonadales	s__uncultured_Armatimonadetes_bacterium_g__norank_f__norank_o__Armatimonadales	OTU5645	1	1	0	0	0	0	0	0	0	3	4	2	1	2	2	16
d__Bacteria	k__norank_d__Bacteria	p__Actinobacteriota	c__Thermoleophilia	o__Gaiellales	f__norank_o__Gaiellales	g__norank_f__norank_o__Gaiellales	s__unclassified_g__norank_f__norank_o__Gaiellales	OTU4446	171	149	79	119	372	213	203	171	241	137	90	219	122	101	35	2422
d__Bacteria	k__norank_d__Bacteria	p__Verrucomicrobiota	c__Verrucomicrobiae	o__Opitutales	f__Opitutaceae	g__Opitutus	s__metagenome_g__Opitutus	OTU1101	2	4	17	3	0	0	3	2	0	14	18	1	0	6	4	74
d__Bacteria	k__norank_d__Bacteria	p__Proteobacteria	c__Gammaproteobacteria	o__Xanthomonadales	f__Rhodanobacteraceae	g__Ahniella	s__unclassified_g__Ahniella	OTU3106	0	0	7	0	0	0	0	0	0	2	0	0	0	0	0	9
d__Bacteria	k__norank_d__Bacteria	p__Proteobacteria	c__Gammaproteobacteria	o__Xanthomonadales	f__Xanthomonadaceae	g__Luteimonas	s__Luteimonas_sp.	OTU3463	0	0	0	0	0	0	0	0	0	0	7	0	0	0	0	7
d__Bacteria	k__norank_d__Bacteria	p__Dependentiae	c__Babeliae	o__Babeliales	f__unclassified_o__Babeliales	g__unclassified_o__Babeliales	s__unclassified_o__Babeliales	OTU21	4	0	0	0	0	0	0	0	0	0	0	0	0	0	0	4
d__Bacteria	k__norank_d__Bacteria	p__Chloroflexi	c__JG30-KF-CM66	o__norank_c__JG30-KF-CM66	f__norank_o__norank_c__JG30-KF-CM66	g__norank_f__norank_o__norank_c__JG30-KF-CM66	s__unclassified_g__norank_f__norank_o__norank_c__JG30-KF-CM66	OTU2517	0	3	1	1	0	1	3	2	4	0	0	0	0	0	0	15
d__Bacteria	k__norank_d__Bacteria	p__Actinobacteriota	c__Thermoleophilia	o__Gaiellales	f__norank_o__Gaiellales	g__norank_f__norank_o__Gaiellales	s__bacterium_Ellin6515	OTU6148	5	17	6	0	5	0	2	1	0	5	0	2	4	8	0	55
d__Bacteria	k__norank_d__Bacteria	p__Chloroflexi	c__Ktedonobacteria	o__Ktedonobacterales	f__JG30-KF-AS9	g__norank_f__JG30-KF-AS9	s__uncultured_bacterium_g__norank_f__JG30-KF-AS9	OTU4280	3	0	0	0	0	0	0	0	12	0	4	2	0	0	1	22
d__Bacteria	k__norank_d__Bacteria	p__Proteobacteria	c__Gammaproteobacteria	o__Coxiellales	f__Coxiellaceae	g__Coxiella	s__unclassified_g__Coxiella	OTU2806	0	0	0	0	0	0	0	0	2	0	0	0	0	0	0	2
d__Bacteria	k__norank_d__Bacteria	p__Proteobacteria	c__Gammaproteobacteria	o__Diplorickettsiales	f__Diplorickettsiaceae	g__Rickettsiella	s__uncultured_Rickettsiella_sp._g__Rickettsiella	OTU2136	5	0	9	1	0	2	0	0	0	0	0	0	2	0	0	19
d__Bacteria	k__norank_d__Bacteria	p__Chloroflexi	c__Ktedonobacteria	o__Ktedonobacterales	f__JG30-KF-AS9	g__norank_f__JG30-KF-AS9	s__unclassified_g__norank_f__JG30-KF-AS9	OTU4297	0	0	0	0	2	0	0	0	0	0	0	0	0	0	0	2
d__Bacteria	k__norank_d__Bacteria	p__Proteobacteria	c__Gammaproteobacteria	o__Burkholderiales	f__Burkholderiaceae	g__Burkholderia-Caballeronia-Paraburkholderia	s__unclassified_g__Burkholderia-Caballeronia-Paraburkholderia	OTU2488	11	13	185	190	85	83	316	138	155	20	10	22	122	35	2	1387
d__Bacteria	k__norank_d__Bacteria	p__Proteobacteria	c__Gammaproteobacteria	o__Diplorickettsiales	f__Diplorickettsiaceae	g__Aquicella	s__unclassified_g__Aquicella	OTU3039	0	0	0	0	0	0	0	0	0	1	0	0	0	0	0	1
d__Bacteria	k__norank_d__Bacteria	p__Dependentiae	c__Babeliae	o__Babeliales	f__Vermiphilaceae	g__norank_f__Vermiphilaceae	s__uncultured_Candidatus_Dependentiae_bacterium_g__norank_f__Vermiphilaceae	OTU1173	1	3	0	0	1	0	0	0	0	0	0	0	0	0	0	5
d__Bacteria	k__norank_d__Bacteria	p__Cyanobacteria	c__Sericytochromatia	o__norank_c__Sericytochromatia	f__norank_o__norank_c__Sericytochromatia	g__norank_f__norank_o__norank_c__Sericytochromatia	s__uncultured_soil_bacterium_g__norank_f__norank_o__norank_c__Sericytochromatia	OTU547	0	0	1	1	0	0	0	0	1	0	0	0	0	0	0	3
d__Bacteria	k__norank_d__Bacteria	p__Proteobacteria	c__Gammaproteobacteria	o__Burkholderiales	f__Nitrosomonadaceae	g__norank_f__Nitrosomonadaceae	s__metagenome_g__norank_f__Nitrosomonadaceae	OTU2980	0	1	2	0	2	0	0	0	0	4	0	2	0	1	2	14
d__Bacteria	k__norank_d__Bacteria	p__Proteobacteria	c__Alphaproteobacteria	o__Rhizobiales	f__norank_o__Rhizobiales	g__norank_f__norank_o__Rhizobiales	s__metagenome_g__norank_f__norank_o__Rhizobiales	OTU5867	1	0	0	0	0	0	0	0	0	0	0	0	0	0	1	2
d__Bacteria	k__norank_d__Bacteria	p__Cyanobacteria	c__Cyanobacteriia	o__Chloroplast	f__norank_o__Chloroplast	g__norank_f__norank_o__Chloroplast	s__unclassified_g__norank_f__norank_o__Chloroplast	OTU781	551	4	32	1	3	1	4	6	2	6	4	89	1	4	0	708
d__Bacteria	k__norank_d__Bacteria	p__Gemmatimonadota	c__Longimicrobia	o__Longimicrobiales	f__Longimicrobiaceae	g__norank_f__Longimicrobiaceae	s__uncultured_bacterium_g__norank_f__Longimicrobiaceae	OTU6516	0	0	0	0	0	0	0	0	0	1	0	0	0	0	0	1
d__Bacteria	k__norank_d__Bacteria	p__Firmicutes	c__Bacilli	o__Entomoplasmatales	f__unclassified_o__Entomoplasmatales	g__unclassified_o__Entomoplasmatales	s__unclassified_o__Entomoplasmatales	OTU2294	0	0	0	0	1	0	0	0	0	0	0	0	0	0	0	1
d__Bacteria	k__norank_d__Bacteria	p__Actinobacteriota	c__Thermoleophilia	o__Solirubrobacterales	f__Solirubrobacteraceae	g__norank_f__Solirubrobacteraceae	s__unclassified_g__norank_f__Solirubrobacteraceae	OTU5346	63	85	53	168	147	133	99	122	148	3	6	16	47	72	12	1174
d__Bacteria	k__norank_d__Bacteria	p__Bdellovibrionota	c__Bdellovibrionia	o__Bdellovibrionales	f__Bdellovibrionaceae	g__Bdellovibrio	s__uncultured_bacterium_g__Bdellovibrio	OTU6546	0	0	0	0	0	1	0	0	6	0	0	0	0	0	0	7
d__Bacteria	k__norank_d__Bacteria	p__Chloroflexi	c__AD3	o__norank_c__AD3	f__norank_o__norank_c__AD3	g__norank_f__norank_o__norank_c__AD3	s__unclassified_g__norank_f__norank_o__norank_c__AD3	OTU1995	6	9	11	8	24	8	30	8	12	1	15	7	1	4	1	145
d__Bacteria	k__norank_d__Bacteria	p__Bacteroidota	c__Bacteroidia	o__Chitinophagales	f__Chitinophagaceae	g__norank_f__Chitinophagaceae	s__unclassified_g__norank_f__Chitinophagaceae	OTU706	0	0	2	0	0	0	0	0	0	2	0	0	0	0	0	4
d__Bacteria	k__norank_d__Bacteria	p__WPS-2	c__norank_p__WPS-2	o__norank_c__norank_p__WPS-2	f__norank_o__norank_c__norank_p__WPS-2	g__norank_f__norank_o__norank_c__norank_p__WPS-2	s__unclassified_g__norank_f__norank_o__norank_c__norank_p__WPS-2	OTU1880	0	0	2	1	0	2	10	0	0	0	4	0	0	0	0	19
d__Bacteria	k__norank_d__Bacteria	p__Verrucomicrobiota	c__Verrucomicrobiae	o__Verrucomicrobiales	f__Verrucomicrobiaceae	g__unclassified_f__Verrucomicrobiaceae	s__unclassified_f__Verrucomicrobiaceae	OTU5586	0	0	3	0	0	0	0	0	0	1	0	0	0	0	1	5
d__Bacteria	k__norank_d__Bacteria	p__Planctomycetota	c__Planctomycetes	o__Isosphaerales	f__Isosphaeraceae	g__norank_f__Isosphaeraceae	s__uncultured_bacterium_g__norank_f__Isosphaeraceae	OTU2497	0	0	0	0	1	0	7	2	7	0	0	0	0	0	0	17
d__Bacteria	k__norank_d__Bacteria	p__Bacteroidota	c__Bacteroidia	o__Cytophagales	f__Spirosomaceae	g__norank_f__Spirosomaceae	s__metagenome_g__norank_f__Spirosomaceae	OTU3147	0	0	0	0	0	0	0	0	0	2	0	0	0	0	0	2
d__Bacteria	k__norank_d__Bacteria	p__Proteobacteria	c__Alphaproteobacteria	o__Rhizobiales	f__Beijerinckiaceae	g__Methylobacterium-Methylorubrum	s__Methylorubrum_extorquens	OTU2571	0	6	0	1	13	0	3	10	5	0	15	0	0	8	0	61
d__Bacteria	k__norank_d__Bacteria	p__Actinobacteriota	c__Actinobacteria	o__Micrococcales	f__Microbacteriaceae	g__Leifsonia	s__Leifsonia_shinshuensis	OTU2920	8	82	42	25	6	17	23	48	4	65	26	8	10	23	28	415
d__Bacteria	k__norank_d__Bacteria	p__Proteobacteria	c__Alphaproteobacteria	o__Rhizobiales	f__Pleomorphomonadaceae	g__norank_f__Pleomorphomonadaceae	s__uncultured_Rhizobiales_bacterium_g__norank_f__Pleomorphomonadaceae	OTU2025	0	6	1	8	0	10	32	22	0	0	0	0	0	0	0	79
d__Bacteria	k__norank_d__Bacteria	p__Chloroflexi	c__Ktedonobacteria	o__Ktedonobacterales	f__Ktedonobacteraceae	g__norank_f__Ktedonobacteraceae	s__unclassified_g__norank_f__Ktedonobacteraceae	OTU2645	0	0	0	12	0	10	0	64	17	0	0	0	0	0	0	103
d__Bacteria	k__norank_d__Bacteria	p__Myxococcota	c__Polyangia	o__Polyangiales	f__Polyangiaceae	g__Pajaroellobacter	s__unclassified_g__Pajaroellobacter	OTU450	0	8	12	3	6	26	7	39	3	1	2	1	2	6	1	117
d__Bacteria	k__norank_d__Bacteria	p__Bacteroidota	c__Bacteroidia	o__Chitinophagales	f__Chitinophagaceae	g__Puia	s__unclassified_g__Puia	OTU5228	9	14	5	3	5	2	0	1	13	7	3	30	0	10	0	102
d__Bacteria	k__norank_d__Bacteria	p__Bacteroidota	c__Bacteroidia	o__Cytophagales	f__Microscillaceae	g__norank_f__Microscillaceae	s__uncultured_bacterium_g__norank_f__Microscillaceae	OTU1550	0	0	1	0	1	5	0	0	0	0	0	0	0	3	0	10
d__Bacteria	k__norank_d__Bacteria	p__Proteobacteria	c__Alphaproteobacteria	o__unclassified_c__Alphaproteobacteria	f__unclassified_c__Alphaproteobacteria	g__unclassified_c__Alphaproteobacteria	s__unclassified_c__Alphaproteobacteria	OTU4726	0	0	0	0	0	0	0	0	0	4	0	0	0	0	0	4
d__Bacteria	k__norank_d__Bacteria	p__Chloroflexi	c__unclassified_p__Chloroflexi	o__unclassified_p__Chloroflexi	f__unclassified_p__Chloroflexi	g__unclassified_p__Chloroflexi	s__unclassified_p__Chloroflexi	OTU3829	0	1	0	0	0	1	3	2	3	0	5	5	1	4	1	26
d__Bacteria	k__norank_d__Bacteria	p__Planctomycetota	c__Planctomycetes	o__Gemmatales	f__Gemmataceae	g__norank_f__Gemmataceae	s__unclassified_g__norank_f__Gemmataceae	OTU2529	2	1	0	1	3	4	2	2	3	0	0	0	2	1	0	21
d__Bacteria	k__norank_d__Bacteria	p__Proteobacteria	c__Alphaproteobacteria	o__Rhodospirillales	f__Magnetospirillaceae	g__Telmatospirillum	s__unclassified_g__Telmatospirillum	OTU2021	4	15	4	0	23	29	72	11	7	2	2	6	10	4	1	190
d__Bacteria	k__norank_d__Bacteria	p__Bacteroidota	c__Bacteroidia	o__Chitinophagales	f__Chitinophagaceae	g__Flavisolibacter	s__unclassified_g__Flavisolibacter	OTU406	0	0	2	0	0	0	0	0	0	0	0	0	0	0	0	2
d__Bacteria	k__norank_d__Bacteria	p__Hydrogenedentes	c__Hydrogenedentia	o__Hydrogenedentiales	f__Hydrogenedensaceae	g__norank_f__Hydrogenedensaceae	s__uncultured_bacterium_g__norank_f__Hydrogenedensaceae	OTU3226	0	0	0	0	0	0	0	0	0	3	0	0	0	0	0	3
d__Bacteria	k__norank_d__Bacteria	p__Chloroflexi	c__Ktedonobacteria	o__B10-SB3A	f__norank_o__B10-SB3A	g__norank_f__norank_o__B10-SB3A	s__uncultured_bacterium_g__norank_f__norank_o__B10-SB3A	OTU3793	2	1	0	0	3	1	4	4	1	0	0	5	28	0	0	49
d__Bacteria	k__norank_d__Bacteria	p__Armatimonadota	c__Armatimonadia	o__Armatimonadales	f__norank_o__Armatimonadales	g__norank_f__norank_o__Armatimonadales	s__uncultured_bacterium_g__norank_f__norank_o__Armatimonadales	OTU2108	0	0	0	0	0	0	3	2	2	0	0	0	2	0	0	9
d__Bacteria	k__norank_d__Bacteria	p__Bacteroidota	c__Bacteroidia	o__Cytophagales	f__Microscillaceae	g__norank_f__Microscillaceae	s__unclassified_g__norank_f__Microscillaceae	OTU3254	0	0	0	0	0	0	0	0	0	6	2	0	0	0	0	8
d__Bacteria	k__norank_d__Bacteria	p__Actinobacteriota	c__Acidimicrobiia	o__Microtrichales	f__unclassified_o__Microtrichales	g__unclassified_o__Microtrichales	s__unclassified_o__Microtrichales	OTU3009	0	0	0	0	0	0	0	0	0	6	0	0	0	0	0	6
d__Bacteria	k__norank_d__Bacteria	p__Chloroflexi	c__Ktedonobacteria	o__Ktedonobacterales	f__Ktedonobacteraceae	g__1921-2	s__uncultured_bacterium_g__1921-2	OTU2391	0	0	0	0	0	0	1	0	0	0	0	0	0	0	0	1
d__Bacteria	k__norank_d__Bacteria	p__Myxococcota	c__Myxococcia	o__Myxococcales	f__Myxococcaceae	g__P3OB-42	s__unclassified_g__P3OB-42	OTU2462	0	0	0	0	0	0	0	1	0	0	0	0	0	0	0	1
d__Bacteria	k__norank_d__Bacteria	p__Patescibacteria	c__Saccharimonadia	o__Saccharimonadales	f__unclassified_o__Saccharimonadales	g__unclassified_o__Saccharimonadales	s__unclassified_o__Saccharimonadales	OTU3977	0	0	0	0	0	0	0	0	0	0	0	0	0	0	1	1
d__Bacteria	k__norank_d__Bacteria	p__Bacteroidota	c__Bacteroidia	o__Cytophagales	f__Microscillaceae	g__norank_f__Microscillaceae	s__unclassified_g__norank_f__Microscillaceae	OTU5488	2	0	3	1	0	0	0	0	0	0	0	0	0	3	6	15
d__Bacteria	k__norank_d__Bacteria	p__Acidobacteriota	c__Vicinamibacteria	o__Vicinamibacterales	f__norank_o__Vicinamibacterales	g__norank_f__norank_o__Vicinamibacterales	s__unclassified_g__norank_f__norank_o__Vicinamibacterales	OTU575	4	3	8	0	9	0	0	0	5	1	11	5	0	32	1	79
d__Bacteria	k__norank_d__Bacteria	p__Planctomycetota	c__Planctomycetes	o__Gemmatales	f__Gemmataceae	g__norank_f__Gemmataceae	s__uncultured_bacterium_g__norank_f__Gemmataceae	OTU3937	0	5	0	0	0	1	0	0	0	0	0	0	0	0	0	6
d__Bacteria	k__norank_d__Bacteria	p__Desulfobacterota	c__norank_p__Desulfobacterota	o__norank_c__norank_p__Desulfobacterota	f__norank_o__norank_c__norank_p__Desulfobacterota	g__norank_f__norank_o__norank_c__norank_p__Desulfobacterota	s__unclassified_g__norank_f__norank_o__norank_c__norank_p__Desulfobacterota	OTU3438	5	0	0	0	0	0	1	0	0	9	8	0	0	5	0	28
d__Bacteria	k__norank_d__Bacteria	p__Firmicutes	c__Clostridia	o__Peptostreptococcales-Tissierellales	f__norank_o__Peptostreptococcales-Tissierellales	g__Peptoniphilus	s__unclassified_g__Peptoniphilus	OTU4903	0	0	0	0	1	0	0	0	2	0	0	0	2	0	0	5
d__Bacteria	k__norank_d__Bacteria	p__Proteobacteria	c__Gammaproteobacteria	o__Xanthomonadales	f__Rhodanobacteraceae	g__Rhodanobacter	s__uncultured_Xanthomonadaceae_bacterium_g__Rhodanobacter	OTU49	18	32	18	2	2	3	2	0	1	26	14	13	1	6	2	140
d__Bacteria	k__norank_d__Bacteria	p__Firmicutes	c__Bacilli	o__Entomoplasmatales	f__type_III	g__norank_f__type_III	s__uncultured_Mollicutes_bacterium_g__norank	OTU3980	0	0	0	0	1	0	0	0	0	2	2	3	0	0	0	8
d__Bacteria	k__norank_d__Bacteria	p__Firmicutes	c__Clostridia	o__Clostridiales	f__Clostridiaceae	g__Clostridium_sensu_stricto_1	s__unclassified_g__Clostridium_sensu_stricto_1	OTU2573	0	3	1	0	0	1	0	4	0	1	0	0	0	0	0	10
d__Bacteria	k__norank_d__Bacteria	p__Desulfobacterota	c__norank_p__Desulfobacterota	o__norank_c__norank_p__Desulfobacterota	f__norank_o__norank_c__norank_p__Desulfobacterota	g__norank_f__norank_o__norank_c__norank_p__Desulfobacterota	s__unclassified_g__norank_f__norank_o__norank_c__norank_p__Desulfobacterota	OTU6167	3	0	0	0	0	0	0	0	0	10	5	1	0	9	5	33
d__Bacteria	k__norank_d__Bacteria	p__Bdellovibrionota	c__Oligoflexia	o__0319-6G20	f__norank_o__0319-6G20	g__norank_f__norank_o__0319-6G20	s__unclassified_g__norank_f__norank_o__0319-6G20	OTU2682	3	2	0	1	2	3	3	7	1	1	0	0	2	2	0	27
d__Bacteria	k__norank_d__Bacteria	p__Myxococcota	c__bacteriap25	o__norank_c__bacteriap25	f__norank_o__norank_c__bacteriap25	g__norank_f__norank_o__norank_c__bacteriap25	s__uncultured_Syntrophobacterales_bacterium_g__norank_f__norank	OTU5513	0	0	0	0	0	0	0	0	3	11	3	0	0	5	3	25
d__Bacteria	k__norank_d__Bacteria	p__Actinobacteriota	c__Acidimicrobiia	o__norank_c__Acidimicrobiia	f__norank_o__norank_c__Acidimicrobiia	g__norank_f__norank_o__norank_c__Acidimicrobiia	s__unclassified_g__norank_f__norank_o__norank_c__Acidimicrobiia	OTU5410	0	0	1	0	1	0	0	0	4	0	0	0	0	2	0	8
d__Bacteria	k__norank_d__Bacteria	p__Acidobacteriota	c__Acidobacteriae	o__Acidobacteriales	f__Acidobacteriaceae_Subgroup_1	g__unclassified_f__Acidobacteriaceae_Subgroup_1	s__unclassified_f__Acidobacteriaceae_Subgroup_1	OTU2483	0	0	0	0	0	0	0	4	0	0	0	0	0	0	0	4
d__Bacteria	k__norank_d__Bacteria	p__Proteobacteria	c__Gammaproteobacteria	o__Legionellales	f__Legionellaceae	g__Legionella	s__unclassified_g__Legionella	OTU2095	0	0	0	0	0	0	2	0	0	0	0	0	0	0	0	2
d__Bacteria	k__norank_d__Bacteria	p__Verrucomicrobiota	c__Verrucomicrobiae	o__Opitutales	f__Opitutaceae	g__unclassified_f__Opitutaceae	s__unclassified_f__Opitutaceae	OTU2602	5	2	9	2	3	2	14	10	7	11	3	3	9	8	1	89
d__Bacteria	k__norank_d__Bacteria	p__Bacteroidota	c__Bacteroidia	o__Chitinophagales	f__norank_o__Chitinophagales	g__norank_f__norank_o__Chitinophagales	s__unclassified_g__norank_f__norank_o__Chitinophagales	OTU1079	0	0	1	4	0	0	0	0	0	0	0	0	0	1	0	6
d__Bacteria	k__norank_d__Bacteria	p__Actinobacteriota	c__Acidimicrobiia	o__IMCC26256	f__norank_o__IMCC26256	g__norank_f__norank_o__IMCC26256	s__uncultured_bacterium_g__norank_f__norank_o__IMCC26256	OTU2996	3	2	0	0	0	0	0	1	1	1	0	0	0	7	2	17
d__Bacteria	k__norank_d__Bacteria	p__Verrucomicrobiota	c__Chlamydiae	o__Chlamydiales	f__Parachlamydiaceae	g__Candidatus_Protochlamydia	s__metagenome_g__Candidatus_Protochlamydia	OTU2234	0	0	0	0	0	1	0	0	0	0	0	0	0	0	0	1
d__Bacteria	k__norank_d__Bacteria	p__Planctomycetota	c__Planctomycetes	o__Gemmatales	f__Gemmataceae	g__norank_f__Gemmataceae	s__unclassified_g__norank_f__Gemmataceae	OTU3697	3	0	0	1	0	4	9	6	0	0	0	2	2	1	0	28
d__Bacteria	k__norank_d__Bacteria	p__Bacteroidota	c__Bacteroidia	o__Flavobacteriales	f__Flavobacteriaceae	g__Flavobacterium	s__unclassified_g__Flavobacterium	OTU1694	0	0	0	0	0	0	0	0	0	1	0	0	0	0	0	1
d__Bacteria	k__norank_d__Bacteria	p__Proteobacteria	c__Gammaproteobacteria	o__Burkholderiales	f__Nitrosomonadaceae	g__Nitrosomonas	s__Nitrosomonas_communis	OTU3191	0	0	0	0	0	0	0	0	0	2	1	0	0	0	1	4
d__Bacteria	k__norank_d__Bacteria	p__Proteobacteria	c__Gammaproteobacteria	o__Xanthomonadales	f__Rhodanobacteraceae	g__Dokdonella	s__uncultured_Dokdonella_sp._g__Dokdonella	OTU2535	127	102	103	11	19	14	54	56	13	188	58	95	16	25	101	982
d__Bacteria	k__norank_d__Bacteria	p__Armatimonadota	c__Fimbriimonadia	o__Fimbriimonadales	f__Fimbriimonadaceae	g__norank_f__Fimbriimonadaceae	s__metagenome_g__norank_f__Fimbriimonadaceae	OTU3190	0	0	0	0	0	0	0	0	0	2	0	0	0	0	0	2
d__Bacteria	k__norank_d__Bacteria	p__Chloroflexi	c__Ktedonobacteria	o__Ktedonobacterales	f__Ktedonobacteraceae	g__unclassified_f__Ktedonobacteraceae	s__unclassified_f__Ktedonobacteraceae	OTU6058	0	11	22	9	1	9	22	62	19	0	7	0	22	0	2	186
d__Bacteria	k__norank_d__Bacteria	p__Acidobacteriota	c__Vicinamibacteria	o__Subgroup_17	f__norank_o__Subgroup_17	g__norank_f__norank_o__Subgroup_17	s__uncultured_Acidobacteria_bacterium_g__norank_f__norank_o__Subgroup_17	OTU3375	1	0	0	0	0	0	0	0	0	1	11	0	0	0	0	13
d__Bacteria	k__norank_d__Bacteria	p__Bacteroidota	c__Bacteroidia	o__Bacteroidales	f__Prevotellaceae	g__Prevotella	s__Prevotella_oralis	OTU3546	0	0	0	0	0	0	0	0	0	0	2	0	0	0	0	2
d__Bacteria	k__norank_d__Bacteria	p__Proteobacteria	c__Gammaproteobacteria	o__unclassified_c__Gammaproteobacteria	f__unclassified_c__Gammaproteobacteria	g__unclassified_c__Gammaproteobacteria	s__unclassified_c__Gammaproteobacteria	OTU2253	0	0	0	0	0	0	1	0	0	0	0	0	0	0	0	1
d__Bacteria	k__norank_d__Bacteria	p__Myxococcota	c__Polyangia	o__Polyangiales	f__BIrii41	g__norank_f__BIrii41	s__uncultured_delta_proteobacterium_g__norank_f__BIrii41	OTU81	3	2	1	1	0	0	0	0	0	23	5	2	0	0	2	39
d__Bacteria	k__norank_d__Bacteria	p__Firmicutes	c__Bacilli	o__Alicyclobacillales	f__Alicyclobacillaceae	g__Tumebacillus	s__unclassified_g__Tumebacillus	OTU321	0	3	0	0	0	0	0	0	0	0	0	0	0	0	0	3
d__Bacteria	k__norank_d__Bacteria	p__Actinobacteriota	c__Actinobacteria	o__Streptosporangiales	f__Thermomonosporaceae	g__Actinomadura	s__unclassified_g__Actinomadura	OTU205	0	20	8	0	0	2	0	5	0	1	1	0	0	3	0	40
d__Bacteria	k__norank_d__Bacteria	p__Proteobacteria	c__Gammaproteobacteria	o__Diplorickettsiales	f__Diplorickettsiaceae	g__Aquicella	s__unclassified_g__Aquicella	OTU1966	0	0	0	0	0	0	3	0	0	0	0	0	0	0	0	3
d__Bacteria	k__norank_d__Bacteria	p__Planctomycetota	c__Phycisphaerae	o__Phycisphaerales	f__Phycisphaeraceae	g__CL500-3	s__uncultured_bacterium_g__CL500-3	OTU3510	0	0	0	0	0	0	0	0	0	0	4	0	0	0	0	4
d__Bacteria	k__norank_d__Bacteria	p__Myxococcota	c__Polyangia	o__Haliangiales	f__Haliangiaceae	g__Haliangium	s__uncultured_bacterium_g__Haliangium	OTU2899	0	0	0	0	0	0	0	0	0	7	1	0	0	1	1	10
d__Bacteria	k__norank_d__Bacteria	p__Acidobacteriota	c__Acidobacteriae	o__Solibacterales	f__Solibacteraceae	g__Candidatus_Solibacter	s__uncultured_bacterium_g__Candidatus_Solibacter	OTU3957	10	2	14	3	3	4	1	3	2	34	17	6	3	15	7	124
d__Bacteria	k__norank_d__Bacteria	p__Firmicutes	c__Bacilli	o__Bacillales	f__Bacillaceae	g__Bacillus	s__Bacillus_infernus	OTU554	0	1	11	0	0	0	0	0	0	0	0	0	0	0	1	13
d__Bacteria	k__norank_d__Bacteria	p__Dependentiae	c__Babeliae	o__Babeliales	f__Vermiphilaceae	g__norank_f__Vermiphilaceae	s__uncultured_bacterium_g__norank_f__Vermiphilaceae	OTU2491	0	0	0	0	8	0	0	1	0	0	0	0	0	0	0	9
d__Bacteria	k__norank_d__Bacteria	p__Proteobacteria	c__Gammaproteobacteria	o__Diplorickettsiales	f__Diplorickettsiaceae	g__Aquicella	s__uncultured_gamma_proteobacterium_g__Aquicella	OTU3117	0	0	0	0	0	0	0	0	0	2	0	1	0	0	0	3
d__Bacteria	k__norank_d__Bacteria	p__Chloroflexi	c__JG30-KF-CM66	o__norank_c__JG30-KF-CM66	f__norank_o__norank_c__JG30-KF-CM66	g__norank_f__norank_o__norank_c__JG30-KF-CM66	s__metagenome_g__norank_f__norank_o__norank_c__JG30-KF-CM66	OTU5536	0	0	0	0	0	0	0	0	0	5	2	2	0	0	1	10
d__Bacteria	k__norank_d__Bacteria	p__Elusimicrobiota	c__Lineage_IIb	o__norank_c__Lineage_IIb	f__norank_o__norank_c__Lineage_IIb	g__norank_f__norank_o__norank_c__Lineage_IIb	s__unclassified_g__norank_f__norank_o__norank_c__Lineage_IIb	OTU6027	1	0	0	0	0	0	0	0	0	0	0	0	0	0	0	1
d__Bacteria	k__norank_d__Bacteria	p__Chloroflexi	c__Ktedonobacteria	o__Ktedonobacterales	f__Ktedonobacteraceae	g__1921-2	s__uncultured_bacterium_g__1921-2	OTU3703	0	1	2	1	0	0	7	2	3	0	0	0	2	0	1	19
d__Bacteria	k__norank_d__Bacteria	p__Chloroflexi	c__Ktedonobacteria	o__B12-WMSP1	f__norank_o__B12-WMSP1	g__norank_f__norank_o__B12-WMSP1	s__unclassified_g__norank_f__norank_o__B12-WMSP1	OTU2170	0	1	2	0	1	2	14	0	1	0	4	0	3	0	0	28
d__Bacteria	k__norank_d__Bacteria	p__Chloroflexi	c__Ktedonobacteria	o__Ktedonobacterales	f__Ktedonobacteraceae	g__unclassified_f__Ktedonobacteraceae	s__unclassified_f__Ktedonobacteraceae	OTU608	0	0	2	1	0	0	0	2	0	0	0	0	0	0	0	5
d__Bacteria	k__norank_d__Bacteria	p__Actinobacteriota	c__Actinobacteria	o__Propionibacteriales	f__Nocardioidaceae	g__Nocardioides	s__unclassified_g__Nocardioides	OTU1529	1	4	1	1	0	7	1	0	3	0	17	1	0	2	0	38
d__Bacteria	k__norank_d__Bacteria	p__Patescibacteria	c__Saccharimonadia	o__Saccharimonadales	f__norank_o__Saccharimonadales	g__norank_f__norank_o__Saccharimonadales	s__unclassified_g__norank_f__norank_o__Saccharimonadales	OTU5664	0	0	0	0	0	0	0	0	0	0	0	0	0	0	2	2
d__Bacteria	k__norank_d__Bacteria	p__Proteobacteria	c__Gammaproteobacteria	o__Burkholderiales	f__Burkholderiaceae	g__norank_f__Burkholderiaceae	s__unclassified_g__norank_f__Burkholderiaceae	OTU6422	0	0	0	0	0	0	0	1	0	0	0	0	0	0	0	1
d__Bacteria	k__norank_d__Bacteria	p__Firmicutes	c__Bacilli	o__Paenibacillales	f__Paenibacillaceae	g__Cohnella	s__unclassified_g__Cohnella	OTU5284	2	4	3	2	0	5	2	7	3	3	4	0	6	4	1	46
d__Bacteria	k__norank_d__Bacteria	p__Actinobacteriota	c__Actinobacteria	o__Propionibacteriales	f__Nocardioidaceae	g__Kribbella	s__Kribbella_karoonensis	OTU3924	53	22	31	12	3	6	0	0	4	12	5	0	1	1	46	196
d__Bacteria	k__norank_d__Bacteria	p__Chloroflexi	c__Ktedonobacteria	o__Ktedonobacterales	f__Ktedonobacteraceae	g__1921-2	s__unclassified_g__1921-2	OTU2125	0	1	3	0	0	7	13	5	32	0	0	0	8	0	1	70
d__Bacteria	k__norank_d__Bacteria	p__Bdellovibrionota	c__Oligoflexia	o__0319-6G20	f__norank_o__0319-6G20	g__norank_f__norank_o__0319-6G20	s__uncultured_bacterium_g__norank_f__norank_o__0319-6G20	OTU5129	2	0	0	0	0	2	2	0	1	1	0	0	0	1	1	10
d__Bacteria	k__norank_d__Bacteria	p__Acidobacteriota	c__Vicinamibacteria	o__Vicinamibacterales	f__norank_o__Vicinamibacterales	g__norank_f__norank_o__Vicinamibacterales	s__unclassified_g__norank_f__norank_o__Vicinamibacterales	OTU1188	0	0	0	0	4	0	0	0	0	1	0	0	0	0	0	5
d__Bacteria	k__norank_d__Bacteria	p__Chloroflexi	c__Ktedonobacteria	o__Ktedonobacterales	f__JG30-KF-AS9	g__norank_f__JG30-KF-AS9	s__unclassified_g__norank_f__JG30-KF-AS9	OTU786	0	0	0	0	0	0	0	0	0	0	1	0	0	0	0	1
d__Bacteria	k__norank_d__Bacteria	p__Firmicutes	c__Bacilli	o__Paenibacillales	f__Paenibacillaceae	g__Paenibacillus	s__Paenibacillus_terrigena	OTU4846	0	2	0	0	1	1	0	1	4	0	0	0	16	0	0	25
d__Bacteria	k__norank_d__Bacteria	p__Bacteroidota	c__Bacteroidia	o__Sphingobacteriales	f__Sphingobacteriaceae	g__Mucilaginibacter	s__uncultured_Mucilaginibacter_sp.	OTU704	78	144	36	458	16	17	46	10	9	0	0	1	2	3	0	820
d__Bacteria	k__norank_d__Bacteria	p__Proteobacteria	c__Gammaproteobacteria	o__Burkholderiales	f__Comamonadaceae	g__Mitsuaria	s__Burkholderiales_bacterium_MSMB34	OTU5355	2	13	7	1	3	23	5	4	3	2	6	0	1	4	0	74
d__Bacteria	k__norank_d__Bacteria	p__Proteobacteria	c__Alphaproteobacteria	o__Rhizobiales	f__Beijerinckiaceae	g__norank_f__Beijerinckiaceae	s__metagenome_g__norank_f__Beijerinckiaceae	OTU2814	0	1	3	6	10	8	16	6	4	3	10	8	17	2	2	96
d__Bacteria	k__norank_d__Bacteria	p__Acidobacteriota	c__Blastocatellia	o__11-24	f__norank_o__11-24	g__norank_f__norank_o__11-24	s__uncultured_Acidobacteriales_bacterium_g__norank	OTU4583	0	0	0	0	0	0	0	0	0	0	0	0	0	1	0	1
d__Bacteria	k__norank_d__Bacteria	p__Proteobacteria	c__Alphaproteobacteria	o__Rickettsiales	f__Rickettsiaceae	g__norank_f__Rickettsiaceae	s__unclassified_g__norank_f__Rickettsiaceae	OTU1343	0	0	0	3	4	0	0	0	0	0	0	0	0	0	0	7
d__Bacteria	k__norank_d__Bacteria	p__Patescibacteria	c__Saccharimonadia	o__Saccharimonadales	f__S32	g__TM7	s__uncultured_bacterium_g__TM7	OTU5643	0	0	0	0	0	0	0	0	0	0	0	0	0	0	2	2
d__Bacteria	k__norank_d__Bacteria	p__Myxococcota	c__Polyangia	o__MSB-4B10	f__norank_o__MSB-4B10	g__norank_f__norank_o__MSB-4B10	s__uncultured_bacterium_g__norank_f__norank_o__MSB-4B10	OTU3649	0	0	0	0	2	0	1	0	0	0	0	2	0	0	0	5
d__Bacteria	k__norank_d__Bacteria	p__Elusimicrobiota	c__Elusimicrobia	o__Lineage_IV	f__norank_o__Lineage_IV	g__norank_f__norank_o__Lineage_IV	s__uncultured_bacterium_g__norank_f__norank_o__Lineage_IV	OTU1172	0	0	0	0	1	1	0	0	0	0	0	0	0	0	0	2
d__Bacteria	k__norank_d__Bacteria	p__Actinobacteriota	c__Acidimicrobiia	o__Microtrichales	f__norank_o__Microtrichales	g__norank_f__norank_o__Microtrichales	s__metagenome_g__norank_f__norank_o__Microtrichales	OTU2901	0	0	0	0	0	0	0	0	0	6	0	0	1	2	7	16
d__Bacteria	k__norank_d__Bacteria	p__Firmicutes	c__Clostridia	o__norank_c__Clostridia	f__Hungateiclostridiaceae	g__unclassified_f__Hungateiclostridiaceae	s__unclassified_f__Hungateiclostridiaceae	OTU669	0	0	3	0	0	0	0	0	0	0	0	0	1	1	0	5
d__Bacteria	k__norank_d__Bacteria	p__Actinobacteriota	c__Thermoleophilia	o__Solirubrobacterales	f__Solirubrobacteraceae	g__Conexibacter	s__unclassified_g__Conexibacter	OTU6517	7	3	5	3	1	0	0	0	0	4	0	0	1	0	0	24
d__Bacteria	k__norank_d__Bacteria	p__Actinobacteriota	c__Actinobacteria	o__Pseudonocardiales	f__Pseudonocardiaceae	g__Pseudonocardia	s__unclassified_g__Pseudonocardia	OTU99	6	1	0	0	0	3	0	0	0	1	0	0	0	0	0	11
d__Bacteria	k__norank_d__Bacteria	p__Proteobacteria	c__Alphaproteobacteria	o__Holosporales	f__Holosporaceae	g__norank_f__Holosporaceae	s__uncultured_bacterium_g__norank_f__Holosporaceae	OTU1231	2	2	6	8	9	3	2	3	1	1	0	2	5	0	1	45
d__Bacteria	k__norank_d__Bacteria	p__Armatimonadota	c__Chthonomonadetes	o__Chthonomonadales	f__Chthonomonadaceae	g__Chthonomonas	s__uncultured_bacterium_g__Chthonomonas	OTU3695	0	3	2	0	0	2	0	1	1	0	1	12	0	1	0	23
d__Bacteria	k__norank_d__Bacteria	p__Bdellovibrionota	c__Bdellovibrionia	o__Bdellovibrionales	f__Bdellovibrionaceae	g__Bdellovibrio	s__metagenome_g__Bdellovibrio	OTU1155	0	0	0	0	2	0	0	0	0	0	0	0	1	0	0	3
d__Bacteria	k__norank_d__Bacteria	p__Chloroflexi	c__Anaerolineae	o__SBR1031	f__A4b	g__norank_f__A4b	s__unclassified_g__norank_f__A4b	OTU2883	0	1	0	0	0	0	0	0	0	4	0	0	0	0	13	18
d__Bacteria	k__norank_d__Bacteria	p__Acidobacteriota	c__Acidobacteriae	o__Solibacterales	f__Solibacteraceae	g__Candidatus_Solibacter	s__unclassified_g__Candidatus_Solibacter	OTU1938	90	116	102	122	150	212	95	70	215	42	68	50	55	81	11	1479
d__Bacteria	k__norank_d__Bacteria	p__Bacteroidota	c__Bacteroidia	o__Chitinophagales	f__Chitinophagaceae	g__Flavisolibacter	s__unclassified_g__Flavisolibacter	OTU410	0	0	5	0	0	0	0	0	0	1	0	0	0	0	0	6
d__Bacteria	k__norank_d__Bacteria	p__Elusimicrobiota	c__Lineage_IIb	o__norank_c__Lineage_IIb	f__norank_o__norank_c__Lineage_IIb	g__norank_f__norank_o__norank_c__Lineage_IIb	s__uncultured_bacterium_g__norank_f__norank_o__norank_c__Lineage_IIb	OTU1102	0	3	0	1	0	0	0	0	0	0	0	0	0	0	0	4
d__Bacteria	k__norank_d__Bacteria	p__Proteobacteria	c__Gammaproteobacteria	o__Diplorickettsiales	f__Diplorickettsiaceae	g__norank_f__Diplorickettsiaceae	s__unclassified_g__norank_f__Diplorickettsiaceae	OTU3361	0	0	0	0	0	0	0	0	0	0	7	0	0	0	0	7
d__Bacteria	k__norank_d__Bacteria	p__Bacteroidota	c__Bacteroidia	o__Sphingobacteriales	f__AKYH767	g__norank_f__AKYH767	s__unclassified_g__norank_f__AKYH767	OTU5593	0	0	0	0	0	0	0	0	0	2	0	0	0	0	1	3
d__Bacteria	k__norank_d__Bacteria	p__Myxococcota	c__Myxococcia	o__Myxococcales	f__Myxococcaceae	g__unclassified_f__Myxococcaceae	s__unclassified_f__Myxococcaceae	OTU3642	0	2	0	0	0	0	0	0	0	0	0	1	0	0	0	3
d__Bacteria	k__norank_d__Bacteria	p__Actinobacteriota	c__Acidimicrobiia	o__Microtrichales	f__Microtrichaceae	g__norank_f__Microtrichaceae	s__metagenome_g__norank_f__Microtrichaceae	OTU434	0	1	2	0	0	0	1	0	0	7	0	0	0	3	3	17
d__Bacteria	k__norank_d__Bacteria	p__Gemmatimonadota	c__Gemmatimonadetes	o__Gemmatimonadales	f__Gemmatimonadaceae	g__norank_f__Gemmatimonadaceae	s__uncultured_bacterium_g__norank_f__Gemmatimonadaceae	OTU4750	0	0	0	0	0	0	0	0	2	2	0	0	0	1	0	5
d__Bacteria	k__norank_d__Bacteria	p__Gemmatimonadota	c__Gemmatimonadetes	o__Gemmatimonadales	f__Gemmatimonadaceae	g__norank_f__Gemmatimonadaceae	s__uncultured_bacterium_g__norank_f__Gemmatimonadaceae	OTU4753	0	0	0	0	0	0	0	0	0	0	0	0	0	1	0	1
d__Bacteria	k__norank_d__Bacteria	p__Desulfobacterota	c__Desulfuromonadia	o__Geobacterales	f__Geobacteraceae	g__Geobacter	s__unclassified_g__Geobacter	OTU530	0	0	3	0	0	0	0	0	0	0	0	0	0	0	0	3
d__Bacteria	k__norank_d__Bacteria	p__Firmicutes	c__Bacilli	o__Thermoactinomycetales	f__Thermoactinomycetaceae	g__Thermoactinomyces	s__Thermoactinomyces_intermedius	OTU3863	0	0	0	0	0	0	0	0	0	1	0	3	0	0	1	5
d__Bacteria	k__norank_d__Bacteria	p__Proteobacteria	c__Gammaproteobacteria	o__Legionellales	f__Legionellaceae	g__Legionella	s__unclassified_g__Legionella	OTU4829	0	0	0	1	1	0	0	0	0	0	0	1	2	0	0	5
d__Bacteria	k__norank_d__Bacteria	p__Gemmatimonadota	c__Gemmatimonadetes	o__Gemmatimonadales	f__Gemmatimonadaceae	g__norank_f__Gemmatimonadaceae	s__uncultured_bacterium_g__norank_f__Gemmatimonadaceae	OTU454	2	0	7	0	1	0	0	0	0	10	1	0	0	0	9	30
d__Bacteria	k__norank_d__Bacteria	p__Bdellovibrionota	c__Oligoflexia	o__0319-6G20	f__norank_o__0319-6G20	g__norank_f__norank_o__0319-6G20	s__bacterium_enrichment_culture_clone_B1262011	OTU6266	0	0	0	0	0	0	1	0	0	0	0	1	0	1	0	3
d__Bacteria	k__norank_d__Bacteria	p__Firmicutes	c__Bacilli	o__Paenibacillales	f__Paenibacillaceae	g__Paenibacillus	s__unclassified_g__Paenibacillus	OTU6145	0	0	0	0	0	0	0	0	0	0	0	0	1	4	0	5
d__Bacteria	k__norank_d__Bacteria	p__Dependentiae	c__Babeliae	o__Babeliales	f__Babeliaceae	g__norank_f__Babeliaceae	s__unclassified_g__norank_f__Babeliaceae	OTU2032	0	0	0	0	0	0	2	0	0	0	0	0	0	0	0	2
d__Bacteria	k__norank_d__Bacteria	p__Verrucomicrobiota	c__Verrucomicrobiae	o__Pedosphaerales	f__Pedosphaeraceae	g__norank_f__Pedosphaeraceae	s__unclassified_g__norank_f__Pedosphaeraceae	OTU3842	0	0	0	0	0	0	0	0	0	1	0	0	0	0	0	1
d__Bacteria	k__norank_d__Bacteria	p__Verrucomicrobiota	c__Verrucomicrobiae	o__Pedosphaerales	f__Pedosphaeraceae	g__norank_f__Pedosphaeraceae	s__unclassified_g__norank_f__Pedosphaeraceae	OTU3845	4	3	9	0	0	0	0	0	0	0	3	4	10	0	5	38
d__Bacteria	k__norank_d__Bacteria	p__Proteobacteria	c__Gammaproteobacteria	o__Acidiferrobacterales	f__Acidiferrobacteraceae	g__Sulfurifustis	s__unclassified_g__Sulfurifustis	OTU3520	0	0	0	0	0	0	0	0	0	0	2	0	0	1	0	3
d__Bacteria	k__norank_d__Bacteria	p__Proteobacteria	c__Gammaproteobacteria	o__Burkholderiales	f__SC-I-84	g__norank_f__SC-I-84	s__unclassified_g__norank_f__SC-I-84	OTU6454	0	1	1	0	12	10	5	0	18	2	14	11	8	7	0	89
d__Bacteria	k__norank_d__Bacteria	p__Patescibacteria	c__Saccharimonadia	o__Saccharimonadales	f__unclassified_o__Saccharimonadales	g__unclassified_o__Saccharimonadales	s__unclassified_o__Saccharimonadales	OTU1077	0	0	0	2	0	0	0	0	0	0	0	0	0	0	0	2
d__Bacteria	k__norank_d__Bacteria	p__Bacteroidota	c__Bacteroidia	o__Chitinophagales	f__Chitinophagaceae	g__Edaphobaculum	s__unclassified_g__Edaphobaculum	OTU386	4	0	4	1	1	1	0	0	0	1	0	0	0	1	0	13
d__Bacteria	k__norank_d__Bacteria	p__Myxococcota	c__Polyangia	o__Polyangiales	f__Polyangiaceae	g__Pajaroellobacter	s__uncultured_delta_proteobacterium_g__Pajaroellobacter	OTU4362	0	4	6	0	5	1	1	5	5	11	4	3	2	7	6	60
d__Bacteria	k__norank_d__Bacteria	p__Bacteroidota	c__Bacteroidia	o__Chitinophagales	f__Chitinophagaceae	g__Edaphobaculum	s__unclassified_g__Edaphobaculum	OTU388	7	4	10	0	2	6	2	4	2	5	0	5	2	4	2	55
d__Bacteria	k__norank_d__Bacteria	p__Proteobacteria	c__Gammaproteobacteria	o__Diplorickettsiales	f__Diplorickettsiaceae	g__norank_f__Diplorickettsiaceae	s__unclassified_g__norank_f__Diplorickettsiaceae	OTU1434	0	0	0	0	0	2	0	0	0	0	0	0	0	0	0	2
d__Bacteria	k__norank_d__Bacteria	p__Chloroflexi	c__JG30-KF-CM66	o__norank_c__JG30-KF-CM66	f__norank_o__norank_c__JG30-KF-CM66	g__norank_f__norank_o__norank_c__JG30-KF-CM66	s__uncultured_bacterium_g__norank_f__norank_o__norank_c__JG30-KF-CM66	OTU676	0	0	1	0	0	0	0	0	0	1	0	0	0	0	0	2
d__Bacteria	k__norank_d__Bacteria	p__Armatimonadota	c__Chthonomonadetes	o__Chthonomonadales	f__Chthonomonadaceae	g__Chthonomonas	s__unclassified_g__Chthonomonas	OTU2590	0	0	0	0	0	1	0	2	3	0	0	0	0	0	0	6
d__Bacteria	k__norank_d__Bacteria	p__Chloroflexi	c__Ktedonobacteria	o__B12-WMSP1	f__norank_o__B12-WMSP1	g__norank_f__norank_o__B12-WMSP1	s__uncultured_Chloroflexi_bacterium_g__norank_f__norank_o__B12-WMSP1	OTU3567	3	8	3	13	0	9	3	0	9	0	2	2	0	3	0	55
d__Bacteria	k__norank_d__Bacteria	p__Actinobacteriota	c__Actinobacteria	o__Frankiales	f__unclassified_o__Frankiales	g__unclassified_o__Frankiales	s__unclassified_o__Frankiales	OTU5782	3	0	0	0	0	0	0	0	0	13	5	1	0	4	7	33
d__Bacteria	k__norank_d__Bacteria	p__Proteobacteria	c__Gammaproteobacteria	o__Gammaproteobacteria_Incertae_Sedis	f__unclassified_o__Gammaproteobacteria_Incertae_Sedis	g__Candidatus_Ovatusbacter	s__uncultured_bacterium_g__Candidatus_Ovatusbacter	OTU1189	0	0	1	0	9	0	0	0	0	0	0	0	0	0	0	10
d__Bacteria	k__norank_d__Bacteria	p__Chloroflexi	c__unclassified_p__Chloroflexi	o__unclassified_p__Chloroflexi	f__unclassified_p__Chloroflexi	g__unclassified_p__Chloroflexi	s__unclassified_p__Chloroflexi	OTU3048	0	0	0	0	0	0	0	0	0	1	0	0	0	1	0	2
d__Bacteria	k__norank_d__Bacteria	p__Chloroflexi	c__Ktedonobacteria	o__B10-SB3A	f__norank_o__B10-SB3A	g__norank_f__norank_o__B10-SB3A	s__uncultured_bacterium_g__norank_f__norank_o__B10-SB3A	OTU3277	0	0	0	0	0	0	1	0	0	0	2	0	0	0	0	3
d__Bacteria	k__norank_d__Bacteria	p__Planctomycetota	c__Phycisphaerae	o__Phycisphaerales	f__Phycisphaeraceae	g__SM1A02	s__metagenome_g__SM1A02	OTU160	4	2	0	0	0	0	0	0	0	10	9	1	1	1	10	38
d__Bacteria	k__norank_d__Bacteria	p__Patescibacteria	c__Saccharimonadia	o__Saccharimonadales	f__LWQ8	g__norank_f__LWQ8	s__uncultured_bacterium_g__norank_f__LWQ8	OTU2485	0	0	0	0	0	0	0	1	0	0	0	0	0	0	0	1
d__Bacteria	k__norank_d__Bacteria	p__Chloroflexi	c__Ktedonobacteria	o__Ktedonobacterales	f__Ktedonobacteraceae	g__1921-2	s__uncultured_bacterium_g__1921-2	OTU418	0	0	2	0	0	0	0	0	0	0	0	0	0	0	0	2
d__Bacteria	k__norank_d__Bacteria	p__Actinobacteriota	c__Thermoleophilia	o__Gaiellales	f__norank_o__Gaiellales	g__norank_f__norank_o__Gaiellales	s__uncultured_Conexibacter_sp._g__norank	OTU3439	25	41	6	10	181	66	38	10	42	22	70	45	34	59	5	654
d__Bacteria	k__norank_d__Bacteria	p__Bacteroidota	c__Bacteroidia	o__Bacteroidales	f__Prevotellaceae	g__Prevotella	s__unclassified_g__Prevotella	OTU3482	0	0	0	0	0	0	0	0	0	0	3	0	0	0	0	3
d__Bacteria	k__norank_d__Bacteria	p__Verrucomicrobiota	c__Verrucomicrobiae	o__Opitutales	f__Opitutaceae	g__Opitutus	s__unclassified_g__Opitutus	OTU735	0	0	3	0	0	0	0	0	0	0	0	0	0	0	1	4
d__Bacteria	k__norank_d__Bacteria	p__Proteobacteria	c__Gammaproteobacteria	o__Gammaproteobacteria_Incertae_Sedis	f__unclassified_o__Gammaproteobacteria_Incertae_Sedis	g__Candidatus_Ovatusbacter	s__uncultured_bacterium_g__Candidatus_Ovatusbacter	OTU4474	0	0	2	0	0	0	0	0	0	0	0	1	0	2	0	5
d__Bacteria	k__norank_d__Bacteria	p__Chloroflexi	c__Ktedonobacteria	o__Ktedonobacterales	f__Ktedonobacteraceae	g__FCPS473	s__uncultured_Thermosporothrix_sp._g__FCPS473	OTU3811	0	1	0	0	0	0	0	0	0	0	0	0	0	0	0	1
d__Bacteria	k__norank_d__Bacteria	p__Armatimonadota	c__Armatimonadia	o__Armatimonadales	f__norank_o__Armatimonadales	g__norank_f__norank_o__Armatimonadales	s__uncultured_bacterium_g__norank_f__norank_o__Armatimonadales	OTU1844	0	0	4	0	0	0	1	0	3	1	0	0	0	4	0	13
d__Bacteria	k__norank_d__Bacteria	p__Armatimonadota	c__Armatimonadia	o__Armatimonadales	f__norank_o__Armatimonadales	g__norank_f__norank_o__Armatimonadales	s__uncultured_bacterium_g__norank_f__norank_o__Armatimonadales	OTU1847	2	0	1	2	0	2	3	1	0	0	0	0	1	4	1	17
d__Bacteria	k__norank_d__Bacteria	p__Verrucomicrobiota	c__Chlamydiae	o__Chlamydiales	f__Simkaniaceae	g__unclassified_f__Simkaniaceae	s__unclassified_f__Simkaniaceae	OTU3668	0	0	0	0	0	1	0	0	0	0	0	3	0	0	0	4
d__Bacteria	k__norank_d__Bacteria	p__Armatimonadota	c__Chthonomonadetes	o__Chthonomonadales	f__Chthonomonadaceae	g__Chthonomonas	s__unclassified_g__Chthonomonas	OTU612	0	0	2	3	0	6	8	0	6	0	0	0	2	0	0	27
d__Bacteria	k__norank_d__Bacteria	p__Proteobacteria	c__Gammaproteobacteria	o__Legionellales	f__Legionellaceae	g__Legionella	s__metagenome_g__Legionella	OTU2567	0	0	2	0	0	0	0	2	0	0	0	0	0	0	0	4
d__Bacteria	k__norank_d__Bacteria	p__Verrucomicrobiota	c__Verrucomicrobiae	o__Pedosphaerales	f__Pedosphaeraceae	g__ADurb.Bin063-1	s__uncultured_bacterium_g__ADurb.Bin063-1	OTU4276	1	4	0	0	0	1	0	0	0	0	3	0	1	0	0	10
d__Bacteria	k__norank_d__Bacteria	p__Myxococcota	c__Myxococcia	o__Myxococcales	f__Anaeromyxobacteraceae	g__Anaeromyxobacter	s__unclassified_g__Anaeromyxobacter	OTU3480	0	0	0	0	0	0	0	0	0	0	11	0	0	0	0	11
d__Bacteria	k__norank_d__Bacteria	p__WPS-2	c__norank_p__WPS-2	o__norank_c__norank_p__WPS-2	f__norank_o__norank_c__norank_p__WPS-2	g__norank_f__norank_o__norank_c__norank_p__WPS-2	s__uncultured_bacterium_g__norank_f__norank_o__norank_c__norank_p__WPS-2	OTU4918	11	3	2	16	33	36	51	71	31	0	1	0	35	0	1	291
d__Bacteria	k__norank_d__Bacteria	p__Planctomycetota	c__Planctomycetes	o__Isosphaerales	f__Isosphaeraceae	g__Aquisphaera	s__uncultured_bacterium_g__Aquisphaera	OTU144	5	0	0	0	0	0	0	0	0	0	0	1	0	0	0	6
d__Bacteria	k__norank_d__Bacteria	p__Proteobacteria	c__Gammaproteobacteria	o__Xanthomonadales	f__Xanthomonadaceae	g__norank_f__Xanthomonadaceae	s__uncultured_bacterium_g__norank_f__Xanthomonadaceae	OTU4462	0	0	0	0	0	0	0	1	0	0	0	0	1	0	0	2
d__Bacteria	k__norank_d__Bacteria	p__Verrucomicrobiota	c__Verrucomicrobiae	o__Chthoniobacterales	f__Chthoniobacteraceae	g__unclassified_f__Chthoniobacteraceae	s__unclassified_f__Chthoniobacteraceae	OTU5997	0	0	0	0	0	0	0	0	0	0	2	0	0	0	0	2
d__Bacteria	k__norank_d__Bacteria	p__Proteobacteria	c__Alphaproteobacteria	o__unclassified_c__Alphaproteobacteria	f__unclassified_c__Alphaproteobacteria	g__unclassified_c__Alphaproteobacteria	s__unclassified_c__Alphaproteobacteria	OTU3351	90	79	78	16	98	62	15	12	54	214	172	110	18	157	44	1219
d__Bacteria	k__norank_d__Bacteria	p__Proteobacteria	c__Alphaproteobacteria	o__Rhizobiales	f__unclassified_o__Rhizobiales	g__unclassified_o__Rhizobiales	s__unclassified_o__Rhizobiales	OTU5067	0	0	0	0	0	0	1	0	0	0	0	1	2	0	0	4
d__Bacteria	k__norank_d__Bacteria	p__Elusimicrobiota	c__Lineage_IIa	o__norank_c__Lineage_IIa	f__norank_o__norank_c__Lineage_IIa	g__norank_f__norank_o__norank_c__Lineage_IIa	s__unclassified_g__norank_f__norank_o__norank_c__Lineage_IIa	OTU9	2	0	0	0	0	0	0	0	0	0	0	0	0	0	0	2
d__Bacteria	k__norank_d__Bacteria	p__Proteobacteria	c__Gammaproteobacteria	o__Burkholderiales	f__Comamonadaceae	g__unclassified_f__Comamonadaceae	s__unclassified_f__Comamonadaceae	OTU3354	1	5	15	0	2	4	2	0	3	4	232	0	2	1	5	276
d__Bacteria	k__norank_d__Bacteria	p__Proteobacteria	c__Gammaproteobacteria	o__Aeromonadales	f__Aeromonadaceae	g__Aeromonas	s__unclassified_g__Aeromonas	OTU1275	1	0	6	1	4	0	0	0	0	1	4	0	0	0	0	17
d__Bacteria	k__norank_d__Bacteria	p__Acidobacteriota	c__Vicinamibacteria	o__Vicinamibacterales	f__norank_o__Vicinamibacterales	g__norank_f__norank_o__Vicinamibacterales	s__unclassified_g__norank_f__norank_o__Vicinamibacterales	OTU3584	14	35	2	1	26	12	11	2	9	0	25	8	0	7	0	152
d__Bacteria	k__norank_d__Bacteria	p__Proteobacteria	c__Gammaproteobacteria	o__Xanthomonadales	f__Rhodanobacteraceae	g__Luteibacter	s__uncultured_bacterium_g__Luteibacter	OTU2927	0	1	0	0	0	1	0	0	0	35	2	0	0	0	0	39
d__Bacteria	k__norank_d__Bacteria	p__Acidobacteriota	c__Acidobacteriae	o__Solibacterales	f__Solibacteraceae	g__Candidatus_Solibacter	s__uncultured_Acidobacteria_bacterium_g__Candidatus_Solibacter	OTU192	110	216	103	93	308	226	115	115	200	123	157	159	59	145	44	2173
d__Bacteria	k__norank_d__Bacteria	p__Proteobacteria	c__Alphaproteobacteria	o__Rhizobiales	f__Rhizobiaceae	g__unclassified_f__Rhizobiaceae	s__unclassified_f__Rhizobiaceae	OTU4963	2	0	1	0	2	0	0	1	0	6	3	2	8	2	3	30
d__Bacteria	k__norank_d__Bacteria	p__Proteobacteria	c__Gammaproteobacteria	o__Burkholderiales	f__Nitrosomonadaceae	g__MND1	s__unclassified_g__MND1	OTU6456	4	3	8	0	0	0	0	0	0	57	14	0	0	0	36	122
d__Bacteria	k__norank_d__Bacteria	p__Proteobacteria	c__Alphaproteobacteria	o__Rhizobiales	f__Rhizobiaceae	g__unclassified_f__Rhizobiaceae	s__unclassified_f__Rhizobiaceae	OTU4960	4	25	19	64	19	4	11	3	12	19	6	9	8	4	20	227
d__Bacteria	k__norank_d__Bacteria	p__RCP2-54	c__norank_p__RCP2-54	o__norank_c__norank_p__RCP2-54	f__norank_o__norank_c__norank_p__RCP2-54	g__norank_f__norank_o__norank_c__norank_p__RCP2-54	s__uncultured_bacterium_g__norank_f__norank_o__norank_c__norank_p__RCP2-54	OTU6522	1	0	1	2	8	4	7	1	3	0	3	0	1	4	0	35
d__Bacteria	k__norank_d__Bacteria	p__Cyanobacteria	c__Cyanobacteriia	o__Chloroplast	f__norank_o__Chloroplast	g__norank_f__norank_o__Chloroplast	s__unclassified_g__norank_f__norank_o__Chloroplast	OTU1050	0	0	0	4	0	1	14	1	2	0	0	0	0	0	0	22
d__Bacteria	k__norank_d__Bacteria	p__Bdellovibrionota	c__Bdellovibrionia	o__Bdellovibrionales	f__Bdellovibrionaceae	g__Bdellovibrio	s__metagenome_g__Bdellovibrio	OTU2178	0	0	0	0	0	7	1	4	2	1	0	1	0	0	2	18
d__Bacteria	k__norank_d__Bacteria	p__Proteobacteria	c__Gammaproteobacteria	o__Coxiellales	f__Coxiellaceae	g__Coxiella	s__unclassified_g__Coxiella	OTU342	0	2	0	0	0	0	0	0	0	0	0	0	0	0	0	2
d__Bacteria	k__norank_d__Bacteria	p__Firmicutes	c__Bacilli	o__Paenibacillales	f__Paenibacillaceae	g__Paenibacillus	s__unclassified_g__Paenibacillus	OTU3235	0	0	0	0	0	0	0	0	0	2	3	0	2	0	0	7
d__Bacteria	k__norank_d__Bacteria	p__Cyanobacteria	c__Cyanobacteriia	o__Chloroplast	f__norank_o__Chloroplast	g__norank_f__norank_o__Chloroplast	s__uncultured_phototrophic_eukaryote_g__norank	OTU2629	0	0	0	0	0	0	0	1	8	0	0	0	0	0	0	9
d__Bacteria	k__norank_d__Bacteria	p__Chloroflexi	c__Ktedonobacteria	o__Ktedonobacterales	f__Ktedonobacteraceae	g__unclassified_f__Ktedonobacteraceae	s__unclassified_f__Ktedonobacteraceae	OTU859	5	6	1	0	0	0	0	0	2	0	0	0	0	0	0	14
d__Bacteria	k__norank_d__Bacteria	p__Proteobacteria	c__Alphaproteobacteria	o__Caulobacterales	f__Caulobacteraceae	g__Brevundimonas	s__Brevundimonas_basaltis	OTU1698	0	2	0	1	7	0	0	0	0	0	0	0	0	3	0	13
d__Bacteria	k__norank_d__Bacteria	p__Planctomycetota	c__Planctomycetes	o__Gemmatales	f__Gemmataceae	g__norank_f__Gemmataceae	s__uncultured_bacterium_g__norank_f__Gemmataceae	OTU550	3	2	2	0	0	0	0	0	0	0	0	0	0	0	0	7
d__Bacteria	k__norank_d__Bacteria	p__Proteobacteria	c__Gammaproteobacteria	o__Burkholderiales	f__Nitrosomonadaceae	g__Ellin6067	s__unclassified_g__Ellin6067	OTU4431	35	19	8	0	3	3	3	0	8	27	18	23	0	20	3	170
d__Bacteria	k__norank_d__Bacteria	p__Bacteroidota	c__Bacteroidia	o__Cytophagales	f__Microscillaceae	g__unclassified_f__Microscillaceae	s__unclassified_f__Microscillaceae	OTU3571	1	7	14	0	0	4	1	4	0	17	2	60	3	34	1	148
d__Bacteria	k__norank_d__Bacteria	p__unclassified_k__norank_d__Bacteria	c__unclassified_k__norank_d__Bacteria	o__unclassified_k__norank_d__Bacteria	f__unclassified_k__norank_d__Bacteria	g__unclassified_k__norank_d__Bacteria	s__unclassified_k__norank_d__Bacteria	OTU2445	0	0	0	0	0	0	0	3	0	0	0	0	0	0	0	3
d__Bacteria	k__norank_d__Bacteria	p__Verrucomicrobiota	c__Verrucomicrobiae	o__Chthoniobacterales	f__Chthoniobacteraceae	g__Chthoniobacter	s__uncultured_Verrucomicrobia_bacterium_g__Chthoniobacter	OTU2414	0	0	0	0	0	0	0	3	0	0	0	0	0	0	0	3
d__Bacteria	k__norank_d__Bacteria	p__Proteobacteria	c__Gammaproteobacteria	o__Burkholderiales	f__A21b	g__norank_f__A21b	s__uncultured_bacterium_g__norank_f__A21b	OTU4458	8	21	0	1	12	19	0	0	13	1	5	1	1	36	0	118
d__Bacteria	k__norank_d__Bacteria	p__Proteobacteria	c__Gammaproteobacteria	o__Enterobacterales	f__Morganellaceae	g__Buchnera	s__Buchnera_aphidicola_Tetraneura_sorini	OTU5503	0	0	0	2	0	0	0	0	0	0	0	0	0	0	1	3
d__Bacteria	k__norank_d__Bacteria	p__Nitrospirota	c__Nitrospiria	o__Nitrospirales	f__Nitrospiraceae	g__Nitrospira	s__uncultured_bacterium_g__Nitrospira	OTU3306	0	0	0	2	0	0	2	0	2	0	1	0	0	2	0	9
d__Bacteria	k__norank_d__Bacteria	p__Dependentiae	c__Babeliae	o__Babeliales	f__unclassified_o__Babeliales	g__unclassified_o__Babeliales	s__unclassified_o__Babeliales	OTU2153	0	0	1	0	0	0	3	0	2	0	0	0	0	0	1	7
d__Bacteria	k__norank_d__Bacteria	p__Chloroflexi	c__AD3	o__norank_c__AD3	f__norank_o__norank_c__AD3	g__norank_f__norank_o__norank_c__AD3	s__unclassified_g__norank_f__norank_o__norank_c__AD3	OTU2620	0	0	0	0	0	0	2	0	3	0	0	0	1	0	0	6
d__Bacteria	k__norank_d__Bacteria	p__Proteobacteria	c__Alphaproteobacteria	o__Acetobacterales	f__Acetobacteraceae	g__Craurococcus-Caldovatus	s__unclassified_g__Craurococcus-Caldovatus	OTU709	0	0	3	0	0	0	0	0	0	0	0	0	0	0	0	3
d__Bacteria	k__norank_d__Bacteria	p__Firmicutes	c__Bacilli	o__Lactobacillales	f__Aerococcaceae	g__Eremococcus	s__uncultured_bacterium_g__Eremococcus	OTU5178	0	0	0	1	1	0	0	0	0	0	5	0	0	0	0	7
d__Bacteria	k__norank_d__Bacteria	p__WPS-2	c__norank_p__WPS-2	o__norank_c__norank_p__WPS-2	f__norank_o__norank_c__norank_p__WPS-2	g__norank_f__norank_o__norank_c__norank_p__WPS-2	s__uncultured_Firmicutes_bacterium_g__norank_f__norank_o__norank_c__norank_p__WPS-2	OTU1969	0	0	2	0	0	0	9	0	0	0	0	0	0	0	0	11
d__Bacteria	k__norank_d__Bacteria	p__Planctomycetota	c__Phycisphaerae	o__Phycisphaerales	f__Phycisphaeraceae	g__SM1A02	s__unclassified_g__SM1A02	OTU4358	0	0	0	0	0	0	0	0	0	3	0	0	0	0	0	3
d__Bacteria	k__norank_d__Bacteria	p__Proteobacteria	c__Gammaproteobacteria	o__Legionellales	f__Legionellaceae	g__Legionella	s__unclassified_g__Legionella	OTU1067	0	0	0	2	0	0	0	0	0	0	0	0	0	0	0	2
d__Bacteria	k__norank_d__Bacteria	p__Verrucomicrobiota	c__Verrucomicrobiae	o__Chthoniobacterales	f__Chthoniobacteraceae	g__Candidatus_Udaeobacter	s__unclassified_g__Candidatus_Udaeobacter	OTU4966	4	8	19	24	13	13	11	25	30	1	1	6	5	1	0	161
d__Bacteria	k__norank_d__Bacteria	p__Bacteroidota	c__Bacteroidia	o__Sphingobacteriales	f__AKYH767	g__norank_f__AKYH767	s__metagenome_g__norank_f__AKYH767	OTU6293	1	0	3	0	0	0	0	0	0	8	9	0	0	0	0	21
d__Bacteria	k__norank_d__Bacteria	p__Proteobacteria	c__Gammaproteobacteria	o__unclassified_c__Gammaproteobacteria	f__unclassified_c__Gammaproteobacteria	g__unclassified_c__Gammaproteobacteria	s__unclassified_c__Gammaproteobacteria	OTU3523	0	0	0	0	0	0	0	0	0	0	4	0	0	0	0	4
d__Bacteria	k__norank_d__Bacteria	p__Proteobacteria	c__Alphaproteobacteria	o__norank_c__Alphaproteobacteria	f__norank_o__norank_c__Alphaproteobacteria	g__norank_f__norank_o__norank_c__Alphaproteobacteria	s__Rhodospirillaceae_bacterium_g__norank	OTU5203	0	8	0	0	0	1	0	0	12	167	44	31	1	78	67	409
d__Bacteria	k__norank_d__Bacteria	p__Chloroflexi	c__Anaerolineae	o__SBR1031	f__A4b	g__norank_f__A4b	s__unclassified_g__norank_f__A4b	OTU5461	0	0	1	0	0	0	0	0	0	4	10	0	0	0	12	27
d__Bacteria	k__norank_d__Bacteria	p__Gemmatimonadota	c__Gemmatimonadetes	o__Gemmatimonadales	f__Gemmatimonadaceae	g__norank_f__Gemmatimonadaceae	s__metagenome_g__norank_f__Gemmatimonadaceae	OTU3626	0	2	0	1	3	7	1	0	0	223	17	131	11	9	6	411
d__Bacteria	k__norank_d__Bacteria	p__Cyanobacteria	c__Sericytochromatia	o__norank_c__Sericytochromatia	f__norank_o__norank_c__Sericytochromatia	g__norank_f__norank_o__norank_c__Sericytochromatia	s__uncultured_soil_bacterium_g__norank_f__norank_o__norank_c__Sericytochromatia	OTU425	1	0	7	2	0	0	0	0	0	1	0	0	0	0	0	11
d__Bacteria	k__norank_d__Bacteria	p__Chloroflexi	c__Ktedonobacteria	o__Ktedonobacterales	f__Ktedonobacteraceae	g__1921-2	s__uncultured_bacterium_g__1921-2	OTU1605	6	0	0	2	0	0	3	0	0	0	0	0	0	0	0	11
d__Bacteria	k__norank_d__Bacteria	p__Actinobacteriota	c__Acidimicrobiia	o__Microtrichales	f__Iamiaceae	g__Iamia	s__uncultured_bacterium_g__Iamia	OTU3061	0	0	2	0	0	0	0	0	0	5	0	0	0	0	1	8
d__Bacteria	k__norank_d__Bacteria	p__Proteobacteria	c__Gammaproteobacteria	o__Burkholderiales	f__Alcaligenaceae	g__Bordetella	s__Bordetella_bronchialis	OTU2211	0	4	3	8	0	1	5	0	0	1	0	0	1	15	0	38
d__Bacteria	k__norank_d__Bacteria	p__Proteobacteria	c__Alphaproteobacteria	o__Micropepsales	f__Micropepsaceae	g__norank_f__Micropepsaceae	s__uncultured_Alphaproteobacteria_bacterium_g__norank_f__Micropepsaceae	OTU5477	23	11	10	0	24	3	2	13	2	13	2	22	1	22	5	153
d__Bacteria	k__norank_d__Bacteria	p__Gemmatimonadota	c__Longimicrobia	o__Longimicrobiales	f__Longimicrobiaceae	g__norank_f__Longimicrobiaceae	s__unclassified_g__norank_f__Longimicrobiaceae	OTU2455	0	0	1	0	0	0	1	3	2	0	0	2	6	0	0	15
d__Bacteria	k__norank_d__Bacteria	p__Firmicutes	c__Bacilli	o__Paenibacillales	f__Paenibacillaceae	g__Paenibacillus	s__unclassified_g__Paenibacillus	OTU3996	0	0	0	1	0	0	0	0	0	0	1	0	0	0	0	2
d__Bacteria	k__norank_d__Bacteria	p__Bdellovibrionota	c__Oligoflexia	o__Oligoflexales	f__norank_o__Oligoflexales	g__norank_f__norank_o__Oligoflexales	s__unclassified_g__norank_f__norank_o__Oligoflexales	OTU3407	0	0	0	0	0	0	0	0	0	0	2	0	0	0	0	2
d__Bacteria	k__norank_d__Bacteria	p__Chloroflexi	c__Ktedonobacteria	o__Ktedonobacterales	f__JG30-KF-AS9	g__norank_f__JG30-KF-AS9	s__uncultured_bacterium_g__norank_f__JG30-KF-AS9	OTU2933	4	1	0	1	0	6	1	7	7	13	41	16	2	1	0	100
d__Bacteria	k__norank_d__Bacteria	p__Firmicutes	c__Bacilli	o__Alicyclobacillales	f__Alicyclobacillaceae	g__Tumebacillus	s__uncultured_bacterium_g__Tumebacillus	OTU766	0	0	0	0	0	0	0	0	1	0	0	0	0	0	0	1
d__Bacteria	k__norank_d__Bacteria	p__Proteobacteria	c__Gammaproteobacteria	o__Diplorickettsiales	f__Diplorickettsiaceae	g__norank_f__Diplorickettsiaceae	s__unclassified_g__norank_f__Diplorickettsiaceae	OTU5765	0	2	0	0	0	0	0	0	0	1	0	0	0	0	0	3
d__Bacteria	k__norank_d__Bacteria	p__Acidobacteriota	c__Subgroup_5	o__norank_c__Subgroup_5	f__norank_o__norank_c__Subgroup_5	g__norank_f__norank_o__norank_c__Subgroup_5	s__unclassified_g__norank_f__norank_o__norank_c__Subgroup_5	OTU1092	13	23	12	12	31	27	15	11	45	1	4	12	6	13	5	230
d__Bacteria	k__norank_d__Bacteria	p__Actinobacteriota	c__Actinobacteria	o__Frankiales	f__Acidothermaceae	g__Acidothermus	s__unclassified_g__Acidothermus	OTU455	15	93	30	19	394	54	97	217	116	21	8	97	256	42	68	1527
d__Bacteria	k__norank_d__Bacteria	p__Bacteroidota	c__Bacteroidia	o__Chitinophagales	f__Chitinophagaceae	g__Lacibacter	s__unclassified_g__Lacibacter	OTU1351	1	0	0	0	3	0	3	1	0	0	0	0	0	0	0	8
d__Bacteria	k__norank_d__Bacteria	p__Bdellovibrionota	c__Oligoflexia	o__0319-6G20	f__norank_o__0319-6G20	g__norank_f__norank_o__0319-6G20	s__unclassified_g__norank_f__norank_o__0319-6G20	OTU1433	0	0	0	0	0	2	0	1	0	0	0	1	0	0	0	4
d__Bacteria	k__norank_d__Bacteria	p__Firmicutes	c__Negativicutes	o__Veillonellales-Selenomonadales	f__Veillonellaceae	g__Dialister	s__Dialister_micraerophilus	OTU3452	0	0	0	0	0	0	0	0	0	0	3	0	0	0	0	3
d__Bacteria	k__norank_d__Bacteria	p__Proteobacteria	c__Gammaproteobacteria	o__Burkholderiales	f__Burkholderiaceae	g__Burkholderia-Caballeronia-Paraburkholderia	s__unclassified_g__Burkholderia-Caballeronia-Paraburkholderia	OTU1543	25	116	36	372	37	562	63	95	201	3	6	23	51	82	9	1681
d__Bacteria	k__norank_d__Bacteria	p__Verrucomicrobiota	c__Verrucomicrobiae	o__Pedosphaerales	f__Pedosphaeraceae	g__norank_f__Pedosphaeraceae	s__uncultured_bacterium_g__norank_f__Pedosphaeraceae	OTU1900	0	0	0	0	1	1	2	0	0	0	0	0	0	0	0	4
d__Bacteria	k__norank_d__Bacteria	p__Cyanobacteria	c__Vampirivibrionia	o__Vampirovibrionales	f__Vampirovibrionaceae	g__norank_f__Vampirovibrionaceae	s__uncultured_bacterium_g__norank_f__Vampirovibrionaceae	OTU4040	0	0	14	0	0	0	0	1	0	0	0	0	0	0	0	15
d__Bacteria	k__norank_d__Bacteria	p__Proteobacteria	c__Gammaproteobacteria	o__Diplorickettsiales	f__Diplorickettsiaceae	g__norank_f__Diplorickettsiaceae	s__unclassified_g__norank_f__Diplorickettsiaceae	OTU625	0	0	3	0	0	0	0	0	0	0	0	0	0	0	0	3
d__Bacteria	k__norank_d__Bacteria	p__Proteobacteria	c__Gammaproteobacteria	o__Burkholderiales	f__Nitrosomonadaceae	g__MND1	s__unclassified_g__MND1	OTU5343	0	2	0	0	1	0	1	0	0	15	16	0	0	15	4	54
d__Bacteria	k__norank_d__Bacteria	p__Cyanobacteria	c__Cyanobacteriia	o__Chloroplast	f__norank_o__Chloroplast	g__norank_f__norank_o__Chloroplast	s__unclassified_g__norank_f__norank_o__Chloroplast	OTU529	0	0	1	1	0	0	0	0	0	0	0	0	1	0	0	3
d__Bacteria	k__norank_d__Bacteria	p__Proteobacteria	c__Alphaproteobacteria	o__Micropepsales	f__Micropepsaceae	g__norank_f__Micropepsaceae	s__unclassified_g__norank_f__Micropepsaceae	OTU2018	1	29	3	2	8	10	12	14	28	4	10	13	2	16	2	154
d__Bacteria	k__norank_d__Bacteria	p__Proteobacteria	c__Gammaproteobacteria	o__Diplorickettsiales	f__Diplorickettsiaceae	g__norank_f__Diplorickettsiaceae	s__metagenome_g__norank_f__Diplorickettsiaceae	OTU4929	0	0	0	0	0	0	0	0	0	0	0	1	2	1	0	4
d__Bacteria	k__norank_d__Bacteria	p__Acidobacteriota	c__Acidobacteriae	o__Bryobacterales	f__Bryobacteraceae	g__Bryobacter	s__uncultured_bacterium_g__Bryobacter	OTU5594	4	1	1	0	1	0	0	0	0	26	0	0	0	0	18	51
d__Bacteria	k__norank_d__Bacteria	p__Bacteroidota	c__Bacteroidia	o__Sphingobacteriales	f__AKYH767	g__norank_f__AKYH767	s__unclassified_g__norank_f__AKYH767	OTU4082	0	0	7	0	0	0	0	0	0	1	0	0	0	0	0	8
d__Bacteria	k__norank_d__Bacteria	p__RCP2-54	c__norank_p__RCP2-54	o__norank_c__norank_p__RCP2-54	f__norank_o__norank_c__norank_p__RCP2-54	g__norank_f__norank_o__norank_c__norank_p__RCP2-54	s__uncultured_bacterium_g__norank_f__norank_o__norank_c__norank_p__RCP2-54	OTU4838	11	24	23	90	37	74	91	28	36	0	22	0	27	3	0	466
d__Bacteria	k__norank_d__Bacteria	p__Patescibacteria	c__Saccharimonadia	o__Saccharimonadales	f__unclassified_o__Saccharimonadales	g__unclassified_o__Saccharimonadales	s__unclassified_o__Saccharimonadales	OTU4897	0	0	0	0	0	0	0	0	0	0	0	0	3	0	0	3
d__Bacteria	k__norank_d__Bacteria	p__RCP2-54	c__norank_p__RCP2-54	o__norank_c__norank_p__RCP2-54	f__norank_o__norank_c__norank_p__RCP2-54	g__norank_f__norank_o__norank_c__norank_p__RCP2-54	s__uncultured_bacterium_g__norank_f__norank_o__norank_c__norank_p__RCP2-54	OTU4835	0	2	3	8	0	7	0	7	4	0	1	0	7	1	0	40
d__Bacteria	k__norank_d__Bacteria	p__Bacteroidota	c__Bacteroidia	o__Chitinophagales	f__Chitinophagaceae	g__norank_f__Chitinophagaceae	s__uncultured_bacterium_g__norank_f__Chitinophagaceae	OTU5251	0	0	0	0	0	0	0	0	0	5	0	0	0	1	0	6
d__Bacteria	k__norank_d__Bacteria	p__Chloroflexi	c__Ktedonobacteria	o__Ktedonobacterales	f__Ktedonobacteraceae	g__unclassified_f__Ktedonobacteraceae	s__unclassified_f__Ktedonobacteraceae	OTU1127	0	0	0	2	0	5	1	1	2	0	0	0	0	0	0	11
d__Bacteria	k__norank_d__Bacteria	p__Verrucomicrobiota	c__Verrucomicrobiae	o__Chthoniobacterales	f__Chthoniobacteraceae	g__LD29	s__unclassified_g__LD29	OTU1270	0	0	0	0	1	0	0	0	0	0	0	1	0	0	0	2
d__Bacteria	k__norank_d__Bacteria	p__Firmicutes	c__Bacilli	o__Thermoactinomycetales	f__Thermoactinomycetaceae	g__Thermoactinomyces	s__uncultured_compost_bacterium_g__Thermoactinomyces	OTU4772	0	0	0	0	0	0	0	0	0	0	0	1	0	0	0	1
d__Bacteria	k__norank_d__Bacteria	p__Acidobacteriota	c__Acidobacteriae	o__Bryobacterales	f__Bryobacteraceae	g__Bryobacter	s__unclassified_g__Bryobacter	OTU3218	3	0	6	0	2	0	0	0	0	10	0	0	0	0	3	24
d__Bacteria	k__norank_d__Bacteria	p__Chloroflexi	c__Ktedonobacteria	o__Ktedonobacterales	f__Ktedonobacteraceae	g__unclassified_f__Ktedonobacteraceae	s__unclassified_f__Ktedonobacteraceae	OTU1129	20	4	14	20	1	2	1	5	0	0	9	1	2	3	0	82
d__Bacteria	k__norank_d__Bacteria	p__Dependentiae	c__Babeliae	o__Babeliales	f__Vermiphilaceae	g__norank_f__Vermiphilaceae	s__uncultured_soil_bacterium_g__norank_f__Vermiphilaceae	OTU2278	11	5	12	13	15	26	2	5	6	7	5	20	3	5	73	208
d__Bacteria	k__norank_d__Bacteria	p__Actinobacteriota	c__Actinobacteria	o__Pseudonocardiales	f__Pseudonocardiaceae	g__Crossiella	s__uncultured_bacterium_g__Crossiella	OTU1526	76	45	55	155	280	118	302	148	67	49	5	8	47	8	9	1372
d__Bacteria	k__norank_d__Bacteria	p__Acidobacteriota	c__Vicinamibacteria	o__Vicinamibacterales	f__norank_o__Vicinamibacterales	g__norank_f__norank_o__Vicinamibacterales	s__uncultured_Acidobacteria_bacterium_g__norank_f__norank_o__Vicinamibacterales	OTU5549	0	0	8	0	0	0	0	0	0	7	43	0	2	0	34	94
d__Bacteria	k__norank_d__Bacteria	p__Actinobacteriota	c__Actinobacteria	o__Corynebacteriales	f__Mycobacteriaceae	g__Mycobacterium	s__unclassified_g__Mycobacterium	OTU1	6	0	0	0	0	0	0	0	0	0	0	0	0	0	0	6
d__Bacteria	k__norank_d__Bacteria	p__Chloroflexi	c__Ktedonobacteria	o__Ktedonobacterales	f__Ktedonobacteraceae	g__HSB_OF53-F07	s__unclassified_g__HSB_OF53-F07	OTU1060	2	4	2	18	7	8	5	4	20	0	2	0	0	4	8	84
d__Bacteria	k__norank_d__Bacteria	p__Chloroflexi	c__Ktedonobacteria	o__Ktedonobacterales	f__Ktedonobacteraceae	g__HSB_OF53-F07	s__unclassified_g__HSB_OF53-F07	OTU1063	0	3	0	5	2	0	0	0	0	0	0	0	0	0	0	10
d__Bacteria	k__norank_d__Bacteria	p__Chloroflexi	c__Anaerolineae	o__SBR1031	f__A4b	g__norank_f__A4b	s__unclassified_g__norank_f__A4b	OTU3928	0	0	0	0	0	0	0	0	0	1	0	0	0	0	0	1
d__Bacteria	k__norank_d__Bacteria	p__Proteobacteria	c__Alphaproteobacteria	o__Rhodospirillales	f__Rhodospirillaceae	g__norank_f__Rhodospirillaceae	s__uncultured_bacterium_g__norank_f__Rhodospirillaceae	OTU5731	8	3	17	12	19	15	18	14	8	28	1	31	9	17	7	207
d__Bacteria	k__norank_d__Bacteria	p__Bacteroidota	c__Bacteroidia	o__Chitinophagales	f__Chitinophagaceae	g__norank_f__Chitinophagaceae	s__unclassified_g__norank_f__Chitinophagaceae	OTU393	0	0	4	0	0	0	0	0	0	0	0	0	0	0	0	4
d__Bacteria	k__norank_d__Bacteria	p__Proteobacteria	c__Gammaproteobacteria	o__Diplorickettsiales	f__Diplorickettsiaceae	g__Aquicella	s__unclassified_g__Aquicella	OTU5084	0	0	0	0	0	0	0	0	0	0	0	0	1	0	0	1
d__Bacteria	k__norank_d__Bacteria	p__Actinobacteriota	c__Acidimicrobiia	o__norank_c__Acidimicrobiia	f__norank_o__norank_c__Acidimicrobiia	g__norank_f__norank_o__norank_c__Acidimicrobiia	s__unclassified_g__norank_f__norank_o__norank_c__Acidimicrobiia	OTU2776	0	0	0	1	1	3	2	1	4	0	0	0	0	0	0	12
d__Bacteria	k__norank_d__Bacteria	p__Proteobacteria	c__Gammaproteobacteria	o__Legionellales	f__Legionellaceae	g__Legionella	s__uncultured_bacterium_g__Legionella	OTU1087	0	0	0	2	0	0	0	0	0	0	0	0	0	0	0	2
d__Bacteria	k__norank_d__Bacteria	p__Verrucomicrobiota	c__Verrucomicrobiae	o__Chthoniobacterales	f__Chthoniobacteraceae	g__unclassified_f__Chthoniobacteraceae	s__unclassified_f__Chthoniobacteraceae	OTU3283	0	0	0	0	0	0	0	0	0	0	1	0	0	0	0	1
d__Bacteria	k__norank_d__Bacteria	p__Bacteroidota	c__Bacteroidia	o__Chitinophagales	f__Chitinophagaceae	g__Edaphobaculum	s__metagenome_g__Edaphobaculum	OTU2671	2	0	1	0	0	0	0	0	2	1	0	1	0	0	0	7
d__Bacteria	k__norank_d__Bacteria	p__Bacteroidota	c__Bacteroidia	o__Flavobacteriales	f__Weeksellaceae	g__Chryseobacterium	s__Chryseobacterium_daecheongense	OTU5590	0	0	0	0	0	0	0	0	0	0	0	0	0	0	2	2
d__Bacteria	k__norank_d__Bacteria	p__Actinobacteriota	c__Actinobacteria	o__Streptosporangiales	f__Thermomonosporaceae	g__Actinocorallia	s__unclassified_g__Actinocorallia	OTU5949	1	0	0	0	0	0	0	0	0	3	0	0	0	1	6	11
d__Bacteria	k__norank_d__Bacteria	p__Acidobacteriota	c__Blastocatellia	o__11-24	f__norank_o__11-24	g__norank_f__norank_o__11-24	s__unclassified_g__norank_f__norank_o__11-24	OTU498	0	0	20	2	0	0	0	0	0	3	0	0	0	0	24	49
d__Bacteria	k__norank_d__Bacteria	p__Chloroflexi	c__Ktedonobacteria	o__Ktedonobacterales	f__Ktedonobacteraceae	g__unclassified_f__Ktedonobacteraceae	s__unclassified_f__Ktedonobacteraceae	OTU4579	0	0	0	0	0	1	0	0	0	0	0	0	0	1	0	2
d__Bacteria	k__norank_d__Bacteria	p__Proteobacteria	c__Alphaproteobacteria	o__Caulobacterales	f__Hyphomonadaceae	g__Hirschia	s__uncultured_bacterium_g__Hirschia	OTU2226	3	1	0	0	0	0	1	0	0	50	31	0	1	0	24	111
d__Bacteria	k__norank_d__Bacteria	p__Proteobacteria	c__Alphaproteobacteria	o__Rhizobiales	f__Beijerinckiaceae	g__unclassified_f__Beijerinckiaceae	s__unclassified_f__Beijerinckiaceae	OTU1972	0	3	0	5	0	0	1	8	0	0	0	0	0	0	0	17
d__Bacteria	k__norank_d__Bacteria	p__Firmicutes	c__Bacilli	o__Alicyclobacillales	f__Alicyclobacillaceae	g__Alicyclobacillus	s__uncultured_bacterium_g__Alicyclobacillus	OTU2464	0	0	1	0	0	1	0	1	0	0	0	0	0	0	0	3
d__Bacteria	k__norank_d__Bacteria	p__Proteobacteria	c__Gammaproteobacteria	o__Gammaproteobacteria_Incertae_Sedis	f__unclassified_o__Gammaproteobacteria_Incertae_Sedis	g__Candidatus_Ovatusbacter	s__uncultured_bacterium_g__Candidatus_Ovatusbacter	OTU979	0	0	0	4	0	0	0	2	0	0	0	0	0	0	0	6
d__Bacteria	k__norank_d__Bacteria	p__Firmicutes	c__Bacilli	o__Paenibacillales	f__Paenibacillaceae	g__unclassified_f__Paenibacillaceae	s__unclassified_f__Paenibacillaceae	OTU871	0	0	0	0	0	0	0	0	0	0	0	1	0	0	0	1
d__Bacteria	k__norank_d__Bacteria	p__Actinobacteriota	c__Acidimicrobiia	o__IMCC26256	f__norank_o__IMCC26256	g__norank_f__norank_o__IMCC26256	s__bacterium_enrichment_culture_clone_auto73_4W	OTU5218	2	0	1	2	13	4	7	5	7	0	5	1	2	2	0	51
d__Bacteria	k__norank_d__Bacteria	p__Verrucomicrobiota	c__Chlamydiae	o__Chlamydiales	f__unclassified_o__Chlamydiales	g__unclassified_o__Chlamydiales	s__unclassified_o__Chlamydiales	OTU609	0	0	4	0	0	0	0	0	0	0	0	0	0	0	0	4
d__Bacteria	k__norank_d__Bacteria	p__Proteobacteria	c__Gammaproteobacteria	o__Diplorickettsiales	f__Diplorickettsiaceae	g__Aquicella	s__unclassified_g__Aquicella	OTU3542	0	0	0	0	0	0	0	0	0	0	3	0	0	0	0	3
d__Bacteria	k__norank_d__Bacteria	p__Chloroflexi	c__Chloroflexia	o__Thermomicrobiales	f__JG30-KF-CM45	g__norank_f__JG30-KF-CM45	s__bacterium_Ellin6537	OTU2972	0	6	5	2	4	3	3	2	5	3	2	3	3	3	0	44
d__Bacteria	k__norank_d__Bacteria	p__Chloroflexi	c__JG30-KF-CM66	o__norank_c__JG30-KF-CM66	f__norank_o__norank_c__JG30-KF-CM66	g__norank_f__norank_o__norank_c__JG30-KF-CM66	s__uncultured_soil_bacterium_g__norank_f__norank_o__norank_c__JG30-KF-CM66	OTU2366	0	0	0	1	0	0	1	0	0	0	0	0	0	1	0	3
d__Bacteria	k__norank_d__Bacteria	p__Bacteroidota	c__Bacteroidia	o__Chitinophagales	f__Chitinophagaceae	g__Puia	s__uncultured_bacterium_g__Puia	OTU2056	40	406	28	322	225	210	291	271	7	10	15	12	11	29	14	1891
d__Bacteria	k__norank_d__Bacteria	p__Patescibacteria	c__Saccharimonadia	o__Saccharimonadales	f__unclassified_o__Saccharimonadales	g__unclassified_o__Saccharimonadales	s__unclassified_o__Saccharimonadales	OTU3201	0	0	0	0	0	0	0	0	0	1	0	0	0	0	0	1
d__Bacteria	k__norank_d__Bacteria	p__Myxococcota	c__Polyangia	o__Polyangiales	f__Polyangiaceae	g__Pajaroellobacter	s__unclassified_g__Pajaroellobacter	OTU1681	13	5	1	8	28	15	10	13	19	6	7	11	8	4	3	151
d__Bacteria	k__norank_d__Bacteria	p__Actinobacteriota	c__Acidimicrobiia	o__IMCC26256	f__norank_o__IMCC26256	g__norank_f__norank_o__IMCC26256	s__uncultured_thermal_soil_bacterium_g__norank_f__norank_o__IMCC26256	OTU820	1	2	0	5	8	20	39	15	6	0	0	0	3	3	0	102
d__Bacteria	k__norank_d__Bacteria	p__Chloroflexi	c__Ktedonobacteria	o__Ktedonobacterales	f__JG30-KF-AS9	g__norank_f__JG30-KF-AS9	s__uncultured_Thermosporothrix_sp._g__norank_f__JG30-KF-AS9	OTU2805	3	0	0	1	0	2	1	1	7	0	0	0	0	0	0	15
d__Bacteria	k__norank_d__Bacteria	p__Firmicutes	c__Limnochordia	o__norank_c__Limnochordia	f__norank_o__norank_c__Limnochordia	g__Hydrogenispora	s__uncultured_bacterium_g__Hydrogenispora	OTU814	0	1	2	0	0	0	0	0	0	0	0	1	0	0	0	4
d__Bacteria	k__norank_d__Bacteria	p__Proteobacteria	c__Gammaproteobacteria	o__Burkholderiales	f__Chromobacteriaceae	g__Pseudogulbenkiania	s__unclassified_g__Pseudogulbenkiania	OTU3120	0	0	0	0	0	0	0	0	0	2	0	0	0	0	0	2
d__Bacteria	k__norank_d__Bacteria	p__Planctomycetota	c__Planctomycetes	o__Gemmatales	f__Gemmataceae	g__norank_f__Gemmataceae	s__unclassified_g__norank_f__Gemmataceae	OTU2102	0	0	0	1	3	1	14	1	2	0	0	5	1	0	0	28
d__Bacteria	k__norank_d__Bacteria	p__Proteobacteria	c__Gammaproteobacteria	o__Diplorickettsiales	f__Diplorickettsiaceae	g__Aquicella	s__unclassified_g__Aquicella	OTU4837	0	0	0	0	0	0	0	0	0	0	0	0	10	0	0	10
d__Bacteria	k__norank_d__Bacteria	p__Planctomycetota	c__Phycisphaerae	o__Phycisphaerales	f__Phycisphaeraceae	g__I-8	s__uncultured_bacterium_g__I-8	OTU3247	0	0	0	0	0	0	0	0	1	2	2	0	0	0	0	5
d__Bacteria	k__norank_d__Bacteria	p__Acidobacteriota	c__Blastocatellia	o__Blastocatellales	f__Blastocatellaceae	g__JGI_0001001-H03	s__uncultured_bacterium_g__JGI_0001001-H03	OTU4937	0	0	0	0	0	0	0	0	0	7	3	0	1	0	8	19
d__Bacteria	k__norank_d__Bacteria	p__Chloroflexi	c__TK10	o__norank_c__TK10	f__norank_o__norank_c__TK10	g__norank_f__norank_o__norank_c__TK10	s__uncultured_bacterium_g__norank_f__norank_o__norank_c__TK10	OTU3826	0	0	0	0	0	0	0	0	0	2	8	9	0	0	1	20
d__Bacteria	k__norank_d__Bacteria	p__Chloroflexi	c__AD3	o__norank_c__AD3	f__norank_o__norank_c__AD3	g__norank_f__norank_o__norank_c__AD3	s__unclassified_g__norank_f__norank_o__norank_c__AD3	OTU2290	0	0	0	0	0	0	2	0	2	1	0	3	0	0	0	8
d__Bacteria	k__norank_d__Bacteria	p__Gemmatimonadota	c__Gemmatimonadetes	o__Gemmatimonadales	f__Gemmatimonadaceae	g__norank_f__Gemmatimonadaceae	s__uncultured_bacterium_g__norank_f__Gemmatimonadaceae	OTU4732	0	0	0	0	0	0	0	0	1	2	0	0	0	14	0	17
d__Bacteria	k__norank_d__Bacteria	p__Firmicutes	c__Negativicutes	o__Veillonellales-Selenomonadales	f__Selenomonadaceae	g__Selenomonas	s__Veillonellaceae_bacterium_oral_taxon_129	OTU3295	0	0	0	0	0	0	0	0	0	0	2	0	0	0	0	2
d__Bacteria	k__norank_d__Bacteria	p__Firmicutes	c__Bacilli	o__Paenibacillales	f__Paenibacillaceae	g__Paenibacillus	s__unclassified_g__Paenibacillus	OTU319	0	2	0	0	0	0	0	0	0	1	1	0	0	0	0	4
d__Bacteria	k__norank_d__Bacteria	p__Gemmatimonadota	c__Gemmatimonadetes	o__Gemmatimonadales	f__Gemmatimonadaceae	g__norank_f__Gemmatimonadaceae	s__uncultured_bacterium_g__norank_f__Gemmatimonadaceae	OTU4739	0	0	0	0	0	0	0	0	0	5	1	0	1	1	0	8
d__Bacteria	k__norank_d__Bacteria	p__Chloroflexi	c__Ktedonobacteria	o__Ktedonobacterales	f__Ktedonobacteraceae	g__FCPS473	s__unclassified_g__FCPS473	OTU3333	0	0	0	0	0	0	0	0	0	0	2	0	0	0	0	2
d__Bacteria	k__norank_d__Bacteria	p__Actinobacteriota	c__Actinobacteria	o__unclassified_c__Actinobacteria	f__unclassified_c__Actinobacteria	g__unclassified_c__Actinobacteria	s__unclassified_c__Actinobacteria	OTU2774	0	0	0	2	0	0	0	0	4	0	0	0	0	0	0	6
d__Bacteria	k__norank_d__Bacteria	p__Firmicutes	c__Bacilli	o__Entomoplasmatales	f__type_III	g__norank_f__type_III	s__uncultured_Mollicutes_bacterium_g__norank	OTU817	0	0	0	0	0	0	0	0	0	0	0	0	2	0	0	2
d__Bacteria	k__norank_d__Bacteria	p__Proteobacteria	c__Gammaproteobacteria	o__Cellvibrionales	f__Spongiibacteraceae	g__BD1-7_clade	s__unclassified_g__BD1-7_clade	OTU1701	0	0	0	0	0	0	0	0	0	1	0	0	0	0	2	3
d__Bacteria	k__norank_d__Bacteria	p__Proteobacteria	c__Gammaproteobacteria	o__Burkholderiales	f__B1-7BS	g__norank_f__B1-7BS	s__unclassified_g__norank_f__B1-7BS	OTU6483	2	0	0	0	0	5	0	2	2	0	0	0	0	0	0	11
d__Bacteria	k__norank_d__Bacteria	p__Verrucomicrobiota	c__Verrucomicrobiae	o__Pedosphaerales	f__Pedosphaeraceae	g__norank_f__Pedosphaeraceae	s__unclassified_g__norank_f__Pedosphaeraceae	OTU3867	0	0	0	0	0	0	0	0	0	0	0	0	0	0	1	1
d__Bacteria	k__norank_d__Bacteria	p__Proteobacteria	c__Alphaproteobacteria	o__Caulobacterales	f__Hyphomonadaceae	g__SWB02	s__uncultured_bacterium_g__SWB02	OTU5287	0	0	0	2	0	0	0	0	0	5	0	0	0	3	4	14
d__Bacteria	k__norank_d__Bacteria	p__Proteobacteria	c__Gammaproteobacteria	o__Burkholderiales	f__SC-I-84	g__norank_f__SC-I-84	s__unclassified_g__norank_f__SC-I-84	OTU6473	1	4	0	0	0	0	1	0	1	3	0	0	0	0	0	10
d__Bacteria	k__norank_d__Bacteria	p__Firmicutes	c__Bacilli	o__Paenibacillales	f__Paenibacillaceae	g__Paenibacillus	s__uncultured_Firmicutes_bacterium_g__Paenibacillus	OTU3633	0	0	0	0	0	0	0	0	2	0	3	3	0	0	0	8
d__Bacteria	k__norank_d__Bacteria	p__Proteobacteria	c__Gammaproteobacteria	o__Burkholderiales	f__SC-I-84	g__norank_f__SC-I-84	s__unclassified_g__norank_f__SC-I-84	OTU2732	0	0	2	0	0	0	1	0	2	2	0	0	0	2	3	12
d__Bacteria	k__norank_d__Bacteria	p__Acidobacteriota	c__Acidobacteriae	o__Acidobacteriales	f__Acidobacteriaceae_Subgroup_1	g__norank_f__Acidobacteriaceae_Subgroup_1	s__unclassified_g__norank_f__Acidobacteriaceae_Subgroup_1	OTU4847	22	38	40	17	38	15	10	16	126	2	36	16	48	8	5	437
d__Bacteria	k__norank_d__Bacteria	p__Bacteroidota	c__Bacteroidia	o__Chitinophagales	f__Saprospiraceae	g__norank_f__Saprospiraceae	s__unclassified_g__norank_f__Saprospiraceae	OTU582	0	0	10	0	0	0	0	0	0	0	0	0	0	0	0	10
d__Bacteria	k__norank_d__Bacteria	p__Acidobacteriota	c__Vicinamibacteria	o__Vicinamibacterales	f__norank_o__Vicinamibacterales	g__norank_f__norank_o__Vicinamibacterales	s__uncultured_Acidobacteriales_bacterium_g__norank_f__norank_o__Vicinamibacterales	OTU2843	25	4	29	0	7	0	3	1	6	14	11	5	4	2	1	112
d__Bacteria	k__norank_d__Bacteria	p__Verrucomicrobiota	c__Chlamydiae	o__Chlamydiales	f__Parachlamydiaceae	g__Neochlamydia	s__metagenome_g__Neochlamydia	OTU409	1	0	3	0	0	0	0	0	0	0	0	0	0	0	0	4
d__Bacteria	k__norank_d__Bacteria	p__Verrucomicrobiota	c__Chlamydiae	o__Chlamydiales	f__Simkaniaceae	g__norank_f__Simkaniaceae	s__unclassified_g__norank_f__Simkaniaceae	OTU1588	0	1	0	0	1	0	1	1	0	0	0	1	0	0	0	5
d__Bacteria	k__norank_d__Bacteria	p__Proteobacteria	c__Gammaproteobacteria	o__Diplorickettsiales	f__Diplorickettsiaceae	g__norank_f__Diplorickettsiaceae	s__unclassified_g__norank_f__Diplorickettsiaceae	OTU1456	0	0	0	0	2	1	2	1	0	0	0	0	0	0	0	6
d__Bacteria	k__norank_d__Bacteria	p__Proteobacteria	c__Gammaproteobacteria	o__Diplorickettsiales	f__Diplorickettsiaceae	g__norank_f__Diplorickettsiaceae	s__unclassified_g__norank_f__Diplorickettsiaceae	OTU1450	0	0	0	0	0	1	0	1	0	0	0	0	0	0	0	2
d__Bacteria	k__norank_d__Bacteria	p__Bdellovibrionota	c__Bdellovibrionia	o__Bacteriovoracales	f__Bacteriovoracaceae	g__Peredibacter	s__metagenome_g__Peredibacter	OTU1262	0	0	0	0	2	0	0	0	0	0	0	0	0	0	0	2
d__Bacteria	k__norank_d__Bacteria	p__Proteobacteria	c__Alphaproteobacteria	o__Caulobacterales	f__Caulobacteraceae	g__Brevundimonas	s__Brevundimonas_vesicularis	OTU2016	4	5	8	2	17	1	9	2	8	1	0	1	3	6	2	69
d__Bacteria	k__norank_d__Bacteria	p__Patescibacteria	c__Saccharimonadia	o__Saccharimonadales	f__norank_o__Saccharimonadales	g__norank_f__norank_o__Saccharimonadales	s__uncultured_bacterium_g__norank_f__norank_o__Saccharimonadales	OTU5482	0	0	0	0	0	0	0	1	0	2	0	0	0	0	5	8
d__Bacteria	k__norank_d__Bacteria	p__Gemmatimonadota	c__Gemmatimonadetes	o__Gemmatimonadales	f__Gemmatimonadaceae	g__norank_f__Gemmatimonadaceae	s__uncultured_proteobacterium_g__norank_f__Gemmatimonadaceae	OTU5999	1	0	1	0	0	0	0	0	0	11	0	0	0	2	1	16
d__Bacteria	k__norank_d__Bacteria	p__Dependentiae	c__Babeliae	o__Babeliales	f__Vermiphilaceae	g__norank_f__Vermiphilaceae	s__unclassified_g__norank_f__Vermiphilaceae	OTU1161	0	1	0	0	3	0	0	0	0	0	0	0	0	0	0	4
d__Bacteria	k__norank_d__Bacteria	p__Acidobacteriota	c__Thermoanaerobaculia	o__Thermoanaerobaculales	f__Thermoanaerobaculaceae	g__Subgroup_10	s__uncultured_bacterium_g__Subgroup_10	OTU4456	0	0	0	0	0	0	0	0	0	2	3	0	0	0	3	8
d__Bacteria	k__norank_d__Bacteria	p__Fusobacteriota	c__Fusobacteriia	o__Fusobacteriales	f__Leptotrichiaceae	g__Leptotrichia	s__Leptotrichia_buccalis_C-1013-b	OTU3319	0	2	1	0	5	0	0	0	0	0	85	0	0	0	0	93
d__Bacteria	k__norank_d__Bacteria	p__Chloroflexi	c__Ktedonobacteria	o__Ktedonobacterales	f__Ktedonobacteraceae	g__HSB_OF53-F07	s__uncultured_bacterium_g__HSB_OF53-F07	OTU193	0	3	2	11	0	4	2	8	5	0	0	0	0	0	0	35
d__Bacteria	k__norank_d__Bacteria	p__Myxococcota	c__Polyangia	o__Polyangiales	f__Polyangiaceae	g__Minicystis	s__metagenome_g__Minicystis	OTU446	11	23	33	12	51	29	21	20	15	1	9	1	3	32	4	265
d__Bacteria	k__norank_d__Bacteria	p__Chloroflexi	c__Ktedonobacteria	o__Ktedonobacterales	f__JG30-KF-AS9	g__norank_f__JG30-KF-AS9	s__uncultured_bacterium_g__norank_f__JG30-KF-AS9	OTU2053	0	0	1	9	3	7	7	1	14	0	1	1	6	1	0	51
d__Bacteria	k__norank_d__Bacteria	p__Bacteroidota	c__Bacteroidia	o__Sphingobacteriales	f__AKYH767	g__norank_f__AKYH767	s__metagenome_g__norank_f__AKYH767	OTU4354	0	1	1	0	0	0	0	0	0	4	14	0	0	0	0	20
d__Bacteria	k__norank_d__Bacteria	p__Proteobacteria	c__Alphaproteobacteria	o__Caulobacterales	f__Caulobacteraceae	g__norank_f__Caulobacteraceae	s__uncultured_Caulobacter_sp._g__norank	OTU3647	10	24	20	32	8	10	10	28	19	14	7	70	19	21	3	295
d__Bacteria	k__norank_d__Bacteria	p__Proteobacteria	c__Gammaproteobacteria	o__Diplorickettsiales	f__Diplorickettsiaceae	g__norank_f__Diplorickettsiaceae	s__metagenome_g__norank_f__Diplorickettsiaceae	OTU2347	0	0	0	0	1	2	1	1	0	0	0	0	3	0	0	8
d__Bacteria	k__norank_d__Bacteria	p__Proteobacteria	c__Gammaproteobacteria	o__CCM19a	f__norank_o__CCM19a	g__norank_f__norank_o__CCM19a	s__uncultured_bacterium_g__norank_f__norank_o__CCM19a	OTU3289	0	0	0	0	0	0	0	0	0	0	4	0	0	0	0	4
d__Bacteria	k__norank_d__Bacteria	p__Bdellovibrionota	c__Bdellovibrionia	o__Bdellovibrionales	f__Bdellovibrionaceae	g__Bdellovibrio	s__unclassified_g__Bdellovibrio	OTU579	0	0	2	0	0	0	0	0	0	0	0	0	0	0	0	2
d__Bacteria	k__norank_d__Bacteria	p__Bdellovibrionota	c__Oligoflexia	o__0319-6G20	f__norank_o__0319-6G20	g__norank_f__norank_o__0319-6G20	s__unclassified_g__norank_f__norank_o__0319-6G20	OTU5252	0	0	0	0	0	0	0	0	2	0	0	0	0	1	0	3
d__Bacteria	k__norank_d__Bacteria	p__Firmicutes	c__Clostridia	o__norank_c__Clostridia	f__Hungateiclostridiaceae	g__unclassified_f__Hungateiclostridiaceae	s__unclassified_f__Hungateiclostridiaceae	OTU47	2	0	0	0	0	0	0	0	0	0	0	0	0	0	0	2
d__Bacteria	k__norank_d__Bacteria	p__Bacteroidota	c__Bacteroidia	o__Chitinophagales	f__Chitinophagaceae	g__norank_f__Chitinophagaceae	s__uncultured_Bacteroidetes_bacterium_g__norank_f__Chitinophagaceae	OTU4316	0	3	0	0	0	0	0	0	0	2	0	0	0	0	1	6
d__Bacteria	k__norank_d__Bacteria	p__Proteobacteria	c__Gammaproteobacteria	o__Diplorickettsiales	f__Diplorickettsiaceae	g__Aquicella	s__uncultured_bacterium_g__Aquicella	OTU1542	0	0	0	0	1	1	0	0	0	0	9	0	0	0	0	11
d__Bacteria	k__norank_d__Bacteria	p__Acidobacteriota	c__Acidobacteriae	o__Acidobacteriales	f__unclassified_o__Acidobacteriales	g__unclassified_o__Acidobacteriales	s__unclassified_o__Acidobacteriales	OTU2771	0	9	0	1	28	11	4	3	18	0	11	2	4	4	0	95
d__Bacteria	k__norank_d__Bacteria	p__Actinobacteriota	c__Thermoleophilia	o__Solirubrobacterales	f__67-14	g__norank_f__67-14	s__uncultured_bacterium_g__norank_f__67-14	OTU5402	16	0	1	0	1	0	0	0	0	19	4	0	0	1	1	43
d__Bacteria	k__norank_d__Bacteria	p__Actinobacteriota	c__Acidimicrobiia	o__IMCC26256	f__norank_o__IMCC26256	g__norank_f__norank_o__IMCC26256	s__unclassified_g__norank_f__norank_o__IMCC26256	OTU2474	0	0	0	0	0	1	23	2	0	0	0	0	0	0	0	26
d__Bacteria	k__norank_d__Bacteria	p__Myxococcota	c__Polyangia	o__mle1-27	f__norank_o__mle1-27	g__norank_f__norank_o__mle1-27	s__unclassified_g__norank_f__norank_o__mle1-27	OTU3246	0	0	0	0	0	0	0	0	0	0	2	0	0	0	0	2
d__Bacteria	k__norank_d__Bacteria	p__Chloroflexi	c__Ktedonobacteria	o__C0119	f__norank_o__C0119	g__norank_f__norank_o__C0119	s__unclassified_g__norank_f__norank_o__C0119	OTU4360	5	7	1	0	1	0	0	0	0	0	5	2	0	0	0	21
d__Bacteria	k__norank_d__Bacteria	p__Myxococcota	c__Myxococcia	o__Myxococcales	f__Myxococcaceae	g__norank_f__Myxococcaceae	s__unclassified_g__norank_f__Myxococcaceae	OTU387	2	2	5	0	1	1	0	0	0	10	6	0	0	7	4	38
d__Bacteria	k__norank_d__Bacteria	p__Verrucomicrobiota	c__Chlamydiae	o__Chlamydiales	f__Simkaniaceae	g__norank_f__Simkaniaceae	s__unclassified_g__norank_f__Simkaniaceae	OTU1776	0	0	0	1	0	0	0	0	1	0	0	0	0	0	0	2
d__Bacteria	k__norank_d__Bacteria	p__Armatimonadota	c__Fimbriimonadia	o__Fimbriimonadales	f__Fimbriimonadaceae	g__Fimbriimonas	s__unclassified_g__Fimbriimonas	OTU5870	5	0	7	0	0	0	0	0	0	0	0	0	0	0	0	12
d__Bacteria	k__norank_d__Bacteria	p__Bacteroidota	c__Bacteroidia	o__Sphingobacteriales	f__env.OPS_17	g__norank_f__env.OPS_17	s__unclassified_g__norank_f__env.OPS_17	OTU2946	0	0	0	0	0	0	0	0	0	1	0	0	0	0	2	3
d__Bacteria	k__norank_d__Bacteria	p__Acidobacteriota	c__Vicinamibacteria	o__Vicinamibacterales	f__norank_o__Vicinamibacterales	g__norank_f__norank_o__Vicinamibacterales	s__unclassified_g__norank_f__norank_o__Vicinamibacterales	OTU1702	0	4	1	6	1	3	3	7	8	0	10	4	3	2	1	53
d__Bacteria	k__norank_d__Bacteria	p__Firmicutes	c__Bacilli	o__Entomoplasmatales	f__type_III	g__norank_f__type_III	s__uncultured_Mollicutes_bacterium_g__norank	OTU1468	0	0	0	2	0	12	0	0	0	0	0	3	1	3	0	21
d__Bacteria	k__norank_d__Bacteria	p__Proteobacteria	c__Alphaproteobacteria	o__Rhizobiales	f__Rhizobiales_Incertae_Sedis	g__norank_f__Rhizobiales_Incertae_Sedis	s__unclassified_g__norank_f__Rhizobiales_Incertae_Sedis	OTU374	19	16	83	1	4	3	19	6	2	9	2	3	4	19	13	203
d__Bacteria	k__norank_d__Bacteria	p__Planctomycetota	c__Planctomycetes	o__Isosphaerales	f__Isosphaeraceae	g__Singulisphaera	s__uncultured_bacterium_g__Singulisphaera	OTU661	0	2	1	1	7	3	4	13	6	0	0	1	1	1	0	40
d__Bacteria	k__norank_d__Bacteria	p__Planctomycetota	c__Planctomycetes	o__Gemmatales	f__Gemmataceae	g__norank_f__Gemmataceae	s__unclassified_g__norank_f__Gemmataceae	OTU6564	3	1	1	0	0	0	5	0	2	0	2	0	2	0	0	16
d__Bacteria	k__norank_d__Bacteria	p__Hydrogenedentes	c__Hydrogenedentia	o__Hydrogenedentiales	f__Hydrogenedensaceae	g__norank_f__Hydrogenedensaceae	s__uncultured_bacterium_g__norank_f__Hydrogenedensaceae	OTU2965	0	1	0	0	0	0	0	0	0	2	0	0	0	0	0	3
d__Bacteria	k__norank_d__Bacteria	p__Firmicutes	c__Bacilli	o__Paenibacillales	f__Paenibacillaceae	g__norank_f__Paenibacillaceae	s__unclassified_g__norank_f__Paenibacillaceae	OTU5020	1	0	3	1	0	3	0	3	5	0	16	6	15	8	1	62
d__Bacteria	k__norank_d__Bacteria	p__Verrucomicrobiota	c__Chlamydiae	o__Chlamydiales	f__cvE6	g__norank_f__cvE6	s__metagenome_g__norank_f__cvE6	OTU6481	4	4	5	4	9	1	6	17	0	0	2	0	2	0	0	54
d__Bacteria	k__norank_d__Bacteria	p__Proteobacteria	c__Gammaproteobacteria	o__Burkholderiales	f__Burkholderiaceae	g__Burkholderia-Caballeronia-Paraburkholderia	s__unclassified_g__Burkholderia-Caballeronia-Paraburkholderia	OTU2787	0	0	14	0	0	0	0	0	1	0	0	0	0	0	0	15
d__Bacteria	k__norank_d__Bacteria	p__Patescibacteria	c__Dojkabacteria	o__norank_c__Dojkabacteria	f__norank_o__norank_c__Dojkabacteria	g__norank_f__norank_o__norank_c__Dojkabacteria	s__uncultured_bacterium_g__norank_f__norank_o__norank_c__Dojkabacteria	OTU2866	0	0	0	0	0	0	0	0	0	2	0	0	0	0	0	2
d__Bacteria	k__norank_d__Bacteria	p__Chloroflexi	c__Anaerolineae	o__Anaerolineales	f__Anaerolineaceae	g__norank_f__Anaerolineaceae	s__unclassified_g__norank_f__Anaerolineaceae	OTU4793	2	0	1	0	0	0	0	0	1	2	0	0	0	1	2	9
d__Bacteria	k__norank_d__Bacteria	p__Proteobacteria	c__Gammaproteobacteria	o__Gammaproteobacteria_Incertae_Sedis	f__unclassified_o__Gammaproteobacteria_Incertae_Sedis	g__Candidatus_Ovatusbacter	s__uncultured_bacterium_g__Candidatus_Ovatusbacter	OTU694	0	1	2	0	1	0	0	0	0	0	0	0	0	0	0	4
d__Bacteria	k__norank_d__Bacteria	p__Proteobacteria	c__Alphaproteobacteria	o__Elsterales	f__norank_o__Elsterales	g__norank_f__norank_o__Elsterales	s__metagenome_g__norank_f__norank_o__Elsterales	OTU4269	0	0	0	0	0	0	0	0	0	3	1	0	0	0	3	7
d__Bacteria	k__norank_d__Bacteria	p__Proteobacteria	c__Alphaproteobacteria	o__Tistrellales	f__Geminicoccaceae	g__Candidatus_Alysiosphaera	s__uncultured_bacterium_g__Candidatus_Alysiosphaera	OTU1089	0	0	0	3	0	0	0	0	0	1	2	0	0	0	0	6
d__Bacteria	k__norank_d__Bacteria	p__Proteobacteria	c__Gammaproteobacteria	o__Diplorickettsiales	f__Diplorickettsiaceae	g__Aquicella	s__unclassified_g__Aquicella	OTU1886	0	0	0	0	0	1	1	0	0	0	0	0	0	0	0	2
d__Bacteria	k__norank_d__Bacteria	p__Dependentiae	c__Babeliae	o__Babeliales	f__unclassified_o__Babeliales	g__unclassified_o__Babeliales	s__unclassified_o__Babeliales	OTU5323	0	7	0	0	1	0	0	0	1	0	2	0	0	3	0	14
d__Bacteria	k__norank_d__Bacteria	p__Proteobacteria	c__Gammaproteobacteria	o__Steroidobacterales	f__Woeseiaceae	g__unclassified_f__Woeseiaceae	s__unclassified_f__Woeseiaceae	OTU3100	0	0	0	0	0	1	0	0	0	1	1	0	0	0	0	3
d__Bacteria	k__norank_d__Bacteria	p__Bdellovibrionota	c__Oligoflexia	o__0319-6G20	f__norank_o__0319-6G20	g__norank_f__norank_o__0319-6G20	s__unclassified_g__norank_f__norank_o__0319-6G20	OTU5458	0	0	0	2	3	0	3	0	0	0	0	0	0	0	2	10
d__Bacteria	k__norank_d__Bacteria	p__Proteobacteria	c__Gammaproteobacteria	o__Diplorickettsiales	f__Diplorickettsiaceae	g__norank_f__Diplorickettsiaceae	s__uncultured_bacterium_g__norank_f__Diplorickettsiaceae	OTU2154	0	1	0	3	0	0	4	1	1	0	0	0	0	5	0	15
d__Bacteria	k__norank_d__Bacteria	p__Firmicutes	c__Limnochordia	o__norank_c__Limnochordia	f__norank_o__norank_c__Limnochordia	g__Hydrogenispora	s__unidentified_eubacterium_clone_BSV81	OTU2495	0	0	0	0	0	0	0	2	0	0	0	0	0	0	0	2
d__Bacteria	k__norank_d__Bacteria	p__Proteobacteria	c__Gammaproteobacteria	o__Burkholderiales	f__Alcaligenaceae	g__Achromobacter	s__unclassified_g__Achromobacter	OTU1757	0	11	8	2	3	1	0	0	0	4	0	0	0	2	3	34
d__Bacteria	k__norank_d__Bacteria	p__Actinobacteriota	c__Actinobacteria	o__Propionibacteriales	f__Nocardioidaceae	g__Nocardioides	s__unclassified_g__Nocardioides	OTU6427	6	2	1	3	2	0	1	0	0	1	10	0	0	2	1	29
d__Bacteria	k__norank_d__Bacteria	p__Proteobacteria	c__Gammaproteobacteria	o__Gammaproteobacteria_Incertae_Sedis	f__unclassified_o__Gammaproteobacteria_Incertae_Sedis	g__Acidibacter	s__uncultured_bacterium_g__Acidibacter	OTU2137	8	7	19	3	60	30	22	57	174	0	4	8	6	10	2	410
d__Bacteria	k__norank_d__Bacteria	p__Actinobacteriota	c__Actinobacteria	o__Pseudonocardiales	f__Pseudonocardiaceae	g__unclassified_f__Pseudonocardiaceae	s__unclassified_f__Pseudonocardiaceae	OTU1535	55	100	22	87	236	58	116	68	32	1	21	55	84	2	2	939
d__Bacteria	k__norank_d__Bacteria	p__Gemmatimonadota	c__Gemmatimonadetes	o__Gemmatimonadales	f__Gemmatimonadaceae	g__norank_f__Gemmatimonadaceae	s__Gemmatimonadetes_bacterium_WY71	OTU6127	0	1	2	0	0	2	0	0	0	1	0	0	0	0	0	6
d__Bacteria	k__norank_d__Bacteria	p__Dependentiae	c__Babeliae	o__Babeliales	f__unclassified_o__Babeliales	g__unclassified_o__Babeliales	s__unclassified_o__Babeliales	OTU111	3	0	0	0	0	0	0	0	0	0	0	0	0	0	0	3
d__Bacteria	k__norank_d__Bacteria	p__Armatimonadota	c__Armatimonadia	o__Armatimonadales	f__norank_o__Armatimonadales	g__norank_f__norank_o__Armatimonadales	s__uncultured_Chloroflexi_bacterium_g__norank_f__norank_o__Armatimonadales	OTU911	1	0	0	5	1	0	0	2	4	0	1	2	0	3	2	21
d__Bacteria	k__norank_d__Bacteria	p__Proteobacteria	c__Gammaproteobacteria	o__Diplorickettsiales	f__Diplorickettsiaceae	g__Aquicella	s__uncultured_bacterium_g__Aquicella	OTU4641	0	0	0	2	0	1	0	0	0	0	0	0	0	0	0	3
d__Bacteria	k__norank_d__Bacteria	p__Bdellovibrionota	c__Oligoflexia	o__Silvanigrellales	f__Silvanigrellaceae	g__Silvanigrella	s__uncultured_bacterium_g__Silvanigrella	OTU6550	0	0	0	0	0	0	0	0	1	0	0	0	0	0	0	1
d__Bacteria	k__norank_d__Bacteria	p__Proteobacteria	c__Alphaproteobacteria	o__Paracaedibacterales	f__Paracaedibacteraceae	g__Candidatus_Paracaedibacter	s__uncultured_Alphaproteobacteria_bacterium_g__Candidatus_Paracaedibacter	OTU2804	0	0	0	0	0	1	0	0	1	0	0	0	0	0	0	2
d__Bacteria	k__norank_d__Bacteria	p__Proteobacteria	c__Alphaproteobacteria	o__Elsterales	f__norank_o__Elsterales	g__norank_f__norank_o__Elsterales	s__unclassified_g__norank_f__norank_o__Elsterales	OTU1832	3	8	0	14	8	36	37	35	10	0	0	0	3	1	0	155
d__Bacteria	k__norank_d__Bacteria	p__Bdellovibrionota	c__Oligoflexia	o__Oligoflexales	f__norank_o__Oligoflexales	g__norank_f__norank_o__Oligoflexales	s__uncultured_bacterium_g__norank_f__norank_o__Oligoflexales	OTU3418	0	0	0	0	1	0	0	0	0	0	2	0	0	0	0	3
d__Bacteria	k__norank_d__Bacteria	p__Actinobacteriota	c__Thermoleophilia	o__Solirubrobacterales	f__67-14	g__norank_f__67-14	s__unclassified_g__norank_f__67-14	OTU3036	1	0	0	0	0	0	0	0	0	5	0	1	1	0	0	8
d__Bacteria	k__norank_d__Bacteria	p__Firmicutes	c__Bacilli	o__Paenibacillales	f__Paenibacillaceae	g__Paenibacillus	s__unclassified_g__Paenibacillus	OTU5062	0	1	0	0	3	0	0	2	0	0	0	0	2	0	0	8
d__Bacteria	k__norank_d__Bacteria	p__Verrucomicrobiota	c__Verrucomicrobiae	o__Opitutales	f__Opitutaceae	g__unclassified_f__Opitutaceae	s__unclassified_f__Opitutaceae	OTU1387	1	7	4	2	2	4	4	2	0	0	0	1	0	2	0	29
d__Bacteria	k__norank_d__Bacteria	p__Planctomycetota	c__Phycisphaerae	o__Phycisphaerales	f__Phycisphaeraceae	g__SM1A02	s__unclassified_g__SM1A02	OTU323	0	2	0	0	0	0	0	0	0	0	1	0	0	0	0	3
d__Bacteria	k__norank_d__Bacteria	p__Acidobacteriota	c__Vicinamibacteria	o__Vicinamibacterales	f__norank_o__Vicinamibacterales	g__norank_f__norank_o__Vicinamibacterales	s__unclassified_g__norank_f__norank_o__Vicinamibacterales	OTU4118	0	0	0	0	0	0	0	0	0	0	0	0	0	0	2	2
d__Bacteria	k__norank_d__Bacteria	p__Firmicutes	c__Clostridia	o__Peptostreptococcales-Tissierellales	f__Anaerovoracaceae	g__Eubacterium_saphenum_group	s__Eubacterium_saphenum_ATCC_49989	OTU1208	1	0	0	0	1	0	0	0	0	0	3	0	0	0	0	5
d__Bacteria	k__norank_d__Bacteria	p__Bdellovibrionota	c__Oligoflexia	o__0319-6G20	f__norank_o__0319-6G20	g__norank_f__norank_o__0319-6G20	s__bacterium_enrichment_culture_clone_B1262011	OTU810	0	0	0	0	0	0	0	2	0	0	0	0	0	0	0	2
d__Bacteria	k__norank_d__Bacteria	p__Dependentiae	c__Babeliae	o__Babeliales	f__unclassified_o__Babeliales	g__unclassified_o__Babeliales	s__unclassified_o__Babeliales	OTU2364	0	0	0	0	0	0	2	3	0	0	0	0	0	0	0	5
d__Bacteria	k__norank_d__Bacteria	p__Chloroflexi	c__Ktedonobacteria	o__Ktedonobacterales	f__JG30-KF-AS9	g__norank_f__JG30-KF-AS9	s__unclassified_g__norank_f__JG30-KF-AS9	OTU3536	0	0	0	0	0	0	1	0	0	0	1	0	0	0	0	2
d__Bacteria	k__norank_d__Bacteria	p__Proteobacteria	c__Alphaproteobacteria	o__Rhodospirillales	f__norank_o__Rhodospirillales	g__norank_f__norank_o__Rhodospirillales	s__uncultured_proteobacterium_g__norank_f__norank_o__Rhodospirillales	OTU5054	3	0	6	1	24	5	4	5	3	1	1	4	5	0	3	65
d__Bacteria	k__norank_d__Bacteria	p__Bacteroidota	c__Bacteroidia	o__Bacteroidales	f__Porphyromonadaceae	g__Porphyromonas	s__Porphyromonas_gingivalis	OTU5114	0	0	2	0	0	0	0	0	0	0	20	0	0	0	0	22
d__Bacteria	k__norank_d__Bacteria	p__Bacteroidota	c__Bacteroidia	o__Flavobacteriales	f__Flavobacteriaceae	g__Flavobacterium	s__unclassified_g__Flavobacterium	OTU3084	3	0	0	0	0	0	0	0	0	2	0	0	0	0	0	5
d__Bacteria	k__norank_d__Bacteria	p__Myxococcota	c__Polyangia	o__Nannocystales	f__Nannocystaceae	g__Nannocystis	s__Nannocystis_pusilla	OTU86	3	0	10	0	0	0	0	2	0	1	3	0	0	0	0	19
d__Bacteria	k__norank_d__Bacteria	p__Proteobacteria	c__Gammaproteobacteria	o__Legionellales	f__Legionellaceae	g__Legionella	s__unclassified_g__Legionella	OTU1233	0	0	0	0	2	1	0	0	0	0	0	0	0	0	0	3
d__Bacteria	k__norank_d__Bacteria	p__Gemmatimonadota	c__Gemmatimonadetes	o__Gemmatimonadales	f__Gemmatimonadaceae	g__norank_f__Gemmatimonadaceae	s__unclassified_g__norank_f__Gemmatimonadaceae	OTU3952	0	0	2	0	0	0	0	0	0	17	2	0	0	0	3	24
d__Bacteria	k__norank_d__Bacteria	p__Chloroflexi	c__Anaerolineae	o__SBR1031	f__norank_o__SBR1031	g__norank_f__norank_o__SBR1031	s__unclassified_g__norank_f__norank_o__SBR1031	OTU958	0	1	8	2	0	0	0	0	0	0	0	0	0	1	0	12
d__Bacteria	k__norank_d__Bacteria	p__Bdellovibrionota	c__Oligoflexia	o__0319-6G20	f__norank_o__0319-6G20	g__norank_f__norank_o__0319-6G20	s__unclassified_g__norank_f__norank_o__0319-6G20	OTU2720	0	0	0	0	0	0	0	0	2	0	0	0	0	0	0	2
d__Bacteria	k__norank_d__Bacteria	p__Myxococcota	c__Myxococcia	o__Myxococcales	f__Myxococcaceae	g__norank_f__Myxococcaceae	s__uncultured_bacterium_g__norank_f__Myxococcaceae	OTU3665	0	0	0	0	0	0	0	0	0	0	0	1	0	0	0	1
d__Bacteria	k__norank_d__Bacteria	p__Actinobacteriota	c__Actinobacteria	o__Kineosporiales	f__Kineosporiaceae	g__Kineococcus	s__unclassified_g__Kineococcus	OTU3458	0	0	0	1	0	0	1	0	0	0	8	0	0	0	0	10
d__Bacteria	k__norank_d__Bacteria	p__Bacteroidota	c__Bacteroidia	o__Chitinophagales	f__Chitinophagaceae	g__norank_f__Chitinophagaceae	s__uncultured_bacterium_g__norank_f__Chitinophagaceae	OTU6254	0	0	0	0	0	0	0	0	0	1	5	4	0	0	0	10
d__Bacteria	k__norank_d__Bacteria	p__Bacteroidota	c__Bacteroidia	o__Sphingobacteriales	f__Sphingobacteriaceae	g__Mucilaginibacter	s__Mucilaginibacter_gossypiicola	OTU5799	5	6	7	0	0	0	1	0	0	0	0	0	0	8	2	29
d__Bacteria	k__norank_d__Bacteria	p__Actinobacteriota	c__Actinobacteria	o__Glycomycetales	f__Glycomycetaceae	g__Glycomyces	s__unclassified_g__Glycomyces	OTU626	4	7	83	0	0	0	0	0	0	1	0	0	0	0	1	96
d__Bacteria	k__norank_d__Bacteria	p__Proteobacteria	c__Gammaproteobacteria	o__Burkholderiales	f__A21b	g__norank_f__A21b	s__uncultured_Rhodocyclaceae_bacterium_g__norank_f__A21b	OTU4386	5	13	0	4	6	7	0	2	1	3	5	2	0	12	0	60
d__Bacteria	k__norank_d__Bacteria	p__Proteobacteria	c__Gammaproteobacteria	o__Burkholderiales	f__Nitrosomonadaceae	g__Ellin6067	s__uncultured_bacterium_g__Ellin6067	OTU2166	38	31	60	3	16	0	3	2	15	203	77	32	10	53	20	563
d__Bacteria	k__norank_d__Bacteria	p__Proteobacteria	c__Alphaproteobacteria	o__Rhizobiales	f__Rhizobiales_Incertae_Sedis	g__Nordella	s__Nordella_oligomobilis	OTU4007	13	18	65	0	2	4	1	13	0	96	58	18	5	24	109	426
d__Bacteria	k__norank_d__Bacteria	p__Chloroflexi	c__Chloroflexia	o__unclassified_c__Chloroflexia	f__unclassified_c__Chloroflexia	g__unclassified_c__Chloroflexia	s__unclassified_c__Chloroflexia	OTU940	7	1	0	3	0	2	1	1	1	0	0	0	0	0	0	16
d__Bacteria	k__norank_d__Bacteria	p__Firmicutes	c__Bacilli	o__Alicyclobacillales	f__Alicyclobacillaceae	g__Tumebacillus	s__unclassified_g__Tumebacillus	OTU2156	0	0	0	0	0	1	1	0	0	0	0	0	0	1	0	3
d__Bacteria	k__norank_d__Bacteria	p__Proteobacteria	c__Gammaproteobacteria	o__Diplorickettsiales	f__Diplorickettsiaceae	g__norank_f__Diplorickettsiaceae	s__unclassified_g__norank_f__Diplorickettsiaceae	OTU602	0	0	4	0	0	0	0	0	0	0	0	0	0	0	0	4
d__Bacteria	k__norank_d__Bacteria	p__Chloroflexi	c__Anaerolineae	o__SBR1031	f__A4b	g__norank_f__A4b	s__unclassified_g__norank_f__A4b	OTU3121	0	0	0	0	0	0	0	0	0	2	2	0	0	0	3	7
d__Bacteria	k__norank_d__Bacteria	p__Proteobacteria	c__Gammaproteobacteria	o__Diplorickettsiales	f__Diplorickettsiaceae	g__norank_f__Diplorickettsiaceae	s__unclassified_g__norank_f__Diplorickettsiaceae	OTU2396	0	0	0	0	0	0	2	1	0	0	0	0	0	0	0	3
d__Bacteria	k__norank_d__Bacteria	p__Armatimonadota	c__Chthonomonadetes	o__Chthonomonadales	f__Chthonomonadaceae	g__Chthonomonas	s__unclassified_g__Chthonomonas	OTU3899	0	0	0	0	0	0	0	0	0	0	1	0	0	0	0	1
d__Bacteria	k__norank_d__Bacteria	p__Patescibacteria	c__WWE3	o__norank_c__WWE3	f__norank_o__norank_c__WWE3	g__norank_f__norank_o__norank_c__WWE3	s__bacterium_enrichment_culture_clone_EBa3	OTU2711	0	0	0	0	0	0	0	0	5	0	0	0	0	0	0	5
d__Bacteria	k__norank_d__Bacteria	p__Actinobacteriota	c__Actinobacteria	o__Micromonosporales	f__Micromonosporaceae	g__unclassified_f__Micromonosporaceae	s__unclassified_f__Micromonosporaceae	OTU6484	29	15	52	6	4	4	1	1	3	47	36	9	0	17	76	300
d__Bacteria	k__norank_d__Bacteria	p__Proteobacteria	c__Alphaproteobacteria	o__Rhizobiales	f__unclassified_o__Rhizobiales	g__unclassified_o__Rhizobiales	s__unclassified_o__Rhizobiales	OTU5642	7	0	1	0	0	0	0	0	0	2	0	0	0	0	6	16
d__Bacteria	k__norank_d__Bacteria	p__Actinobacteriota	c__Acidimicrobiia	o__Microtrichales	f__unclassified_o__Microtrichales	g__unclassified_o__Microtrichales	s__unclassified_o__Microtrichales	OTU3059	2	4	6	0	2	0	1	2	3	110	45	23	2	15	10	225
d__Bacteria	k__norank_d__Bacteria	p__Myxococcota	c__Myxococcia	o__Myxococcales	f__Anaeromyxobacteraceae	g__Anaeromyxobacter	s__uncultured_bacterium_g__Anaeromyxobacter	OTU4437	0	0	0	0	0	0	0	0	0	0	0	0	0	3	0	3
d__Bacteria	k__norank_d__Bacteria	p__Chloroflexi	c__Ktedonobacteria	o__C0119	f__norank_o__C0119	g__norank_f__norank_o__C0119	s__uncultured_bacterium_g__norank_f__norank_o__C0119	OTU353	0	0	3	0	0	0	0	0	0	0	0	0	0	0	0	3
d__Bacteria	k__norank_d__Bacteria	p__Bdellovibrionota	c__Oligoflexia	o__0319-6G20	f__norank_o__0319-6G20	g__norank_f__norank_o__0319-6G20	s__unclassified_g__norank_f__norank_o__0319-6G20	OTU3854	0	0	0	0	0	1	0	0	1	0	0	0	0	0	0	2
d__Bacteria	k__norank_d__Bacteria	p__Proteobacteria	c__Gammaproteobacteria	o__Burkholderiales	f__Burkholderiaceae	g__Cupriavidus	s__unclassified_g__Cupriavidus	OTU2998	2	4	9	0	9	5	2	4	2	68	16	16	0	29	32	198
d__Bacteria	k__norank_d__Bacteria	p__Acidobacteriota	c__Subgroup_11	o__norank_c__Subgroup_11	f__norank_o__norank_c__Subgroup_11	g__norank_f__norank_o__norank_c__Subgroup_11	s__uncultured_bacterium_g__norank_f__norank_o__norank_c__Subgroup_11	OTU4295	0	0	1	0	0	0	0	0	1	2	0	0	0	0	1	5
d__Bacteria	k__norank_d__Bacteria	p__Patescibacteria	c__Parcubacteria	o__norank_c__Parcubacteria	f__norank_o__norank_c__Parcubacteria	g__norank_f__norank_o__norank_c__Parcubacteria	s__uncultured_bacterium_g__norank_f__norank_o__norank_c__Parcubacteria	OTU2722	0	1	0	0	0	0	0	0	4	0	0	0	0	0	0	5
d__Bacteria	k__norank_d__Bacteria	p__Proteobacteria	c__Gammaproteobacteria	o__unclassified_c__Gammaproteobacteria	f__unclassified_c__Gammaproteobacteria	g__unclassified_c__Gammaproteobacteria	s__unclassified_c__Gammaproteobacteria	OTU1260	0	0	0	0	5	0	0	0	0	0	0	0	0	0	0	5
d__Bacteria	k__norank_d__Bacteria	p__Chloroflexi	c__Ktedonobacteria	o__Ktedonobacterales	f__Ktedonobacteraceae	g__FCPS473	s__unclassified_g__FCPS473	OTU265	0	8	0	0	0	1	0	0	1	0	0	0	0	0	0	10
d__Bacteria	k__norank_d__Bacteria	p__Actinobacteriota	c__Actinobacteria	o__Frankiales	f__Acidothermaceae	g__Acidothermus	s__unclassified_g__Acidothermus	OTU4987	6	6	9	1	4	4	4	2	2	1	3	1	22	5	1	71
d__Bacteria	k__norank_d__Bacteria	p__Actinobacteriota	c__Actinobacteria	o__Corynebacteriales	f__Corynebacteriaceae	g__Corynebacterium	s__Corynebacterium_imitans	OTU52	4	8	17	3	33	0	7	19	7	0	12	0	8	2	1	121
d__Bacteria	k__norank_d__Bacteria	p__Verrucomicrobiota	c__Chlamydiae	o__Chlamydiales	f__cvE6	g__norank_f__cvE6	s__unclassified_g__norank_f__cvE6	OTU1169	1	0	0	0	3	0	0	0	2	0	0	0	0	0	0	6
d__Bacteria	k__norank_d__Bacteria	p__Proteobacteria	c__Gammaproteobacteria	o__Diplorickettsiales	f__Diplorickettsiaceae	g__Aquicella	s__uncultured_bacterium_g__Aquicella	OTU2177	0	0	0	0	0	0	0	0	0	0	1	0	1	0	0	2
d__Bacteria	k__norank_d__Bacteria	p__Bdellovibrionota	c__Bdellovibrionia	o__Bdellovibrionales	f__Bdellovibrionaceae	g__Bdellovibrio	s__unclassified_g__Bdellovibrio	OTU715	3	0	4	4	1	4	0	0	1	0	0	0	1	0	0	18
d__Bacteria	k__norank_d__Bacteria	p__Verrucomicrobiota	c__Verrucomicrobiae	o__Methylacidiphilales	f__Methylacidiphilaceae	g__norank_f__Methylacidiphilaceae	s__Verrucomicrobium_sp._GAS474	OTU1463	0	1	0	4	0	1	2	0	0	0	0	0	0	0	0	8
d__Bacteria	k__norank_d__Bacteria	p__RCP2-54	c__norank_p__RCP2-54	o__norank_c__norank_p__RCP2-54	f__norank_o__norank_c__norank_p__RCP2-54	g__norank_f__norank_o__norank_c__norank_p__RCP2-54	s__uncultured_bacterium_g__norank_f__norank_o__norank_c__norank_p__RCP2-54	OTU4033	0	0	0	0	0	0	0	0	0	4	0	0	0	0	1	5
d__Bacteria	k__norank_d__Bacteria	p__Chloroflexi	c__Ktedonobacteria	o__C0119	f__norank_o__C0119	g__norank_f__norank_o__C0119	s__uncultured_soil_bacterium_g__norank_f__norank_o__C0119	OTU3860	0	0	3	0	0	0	0	0	0	0	0	0	0	0	0	3
d__Bacteria	k__norank_d__Bacteria	p__Verrucomicrobiota	c__Verrucomicrobiae	o__Pedosphaerales	f__Pedosphaeraceae	g__norank_f__Pedosphaeraceae	s__uncultured_bacterium_g__norank_f__Pedosphaeraceae	OTU6583	2	0	3	0	0	0	0	0	0	0	0	0	0	0	1	6
d__Bacteria	k__norank_d__Bacteria	p__Chloroflexi	c__Ktedonobacteria	o__Ktedonobacterales	f__JG30-KF-AS9	g__norank_f__JG30-KF-AS9	s__unclassified_g__norank_f__JG30-KF-AS9	OTU1703	8	6	1	32	9	26	25	19	20	1	0	2	49	1	1	200
d__Bacteria	k__norank_d__Bacteria	p__Bacteroidota	c__Bacteroidia	o__Chitinophagales	f__Chitinophagaceae	g__Filimonas	s__eubacterium_sp._11-14	OTU6577	1	7	7	0	0	1	0	4	0	8	1	29	1	3	2	64
d__Bacteria	k__norank_d__Bacteria	p__Actinobacteriota	c__Actinobacteria	o__Propionibacteriales	f__Nocardioidaceae	g__Nocardioides	s__unclassified_g__Nocardioides	OTU2847	2	2	0	0	0	0	0	2	0	4	0	1	1	0	1	13
d__Bacteria	k__norank_d__Bacteria	p__Actinobacteriota	c__Thermoleophilia	o__Solirubrobacterales	f__Solirubrobacteraceae	g__Conexibacter	s__metagenome_g__Conexibacter	OTU887	0	0	0	0	0	0	0	0	0	0	0	0	0	0	1	1
d__Bacteria	k__norank_d__Bacteria	p__Bacteroidota	c__Kryptonia	o__Kryptoniales	f__BSV26	g__norank_f__BSV26	s__uncultured_bacterium_g__norank_f__BSV26	OTU4544	0	2	0	0	0	0	0	2	1	0	0	0	0	2	0	7
d__Bacteria	k__norank_d__Bacteria	p__Bacteroidota	c__Bacteroidia	o__Bacteroidales	f__Prevotellaceae	g__Alloprevotella	s__unclassified_g__Alloprevotella	OTU125	10	0	2	0	1	0	0	0	0	0	8	0	0	0	0	21
d__Bacteria	k__norank_d__Bacteria	p__Acidobacteriota	c__Vicinamibacteria	o__Vicinamibacterales	f__Vicinamibacteraceae	g__norank_f__Vicinamibacteraceae	s__uncultured_Acidobacteria_bacterium_g__norank_f__Vicinamibacteraceae	OTU6471	13	4	103	1	10	0	4	0	0	76	124	0	0	0	60	395
d__Bacteria	k__norank_d__Bacteria	p__Acidobacteriota	c__Vicinamibacteria	o__Vicinamibacterales	f__norank_o__Vicinamibacterales	g__norank_f__norank_o__Vicinamibacterales	s__unclassified_g__norank_f__norank_o__Vicinamibacterales	OTU4708	0	2	1	0	0	0	0	0	1	2	0	0	0	0	0	6
d__Bacteria	k__norank_d__Bacteria	p__Proteobacteria	c__Alphaproteobacteria	o__Rhizobiales	f__Rhizobiales_Incertae_Sedis	g__Phreatobacter	s__uncultured_bacterium_g__Phreatobacter	OTU3032	0	0	0	0	0	0	0	0	0	2	0	0	0	0	0	2
d__Bacteria	k__norank_d__Bacteria	p__Acidobacteriota	c__Vicinamibacteria	o__Vicinamibacterales	f__norank_o__Vicinamibacterales	g__norank_f__norank_o__Vicinamibacterales	s__unclassified_g__norank_f__norank_o__Vicinamibacterales	OTU4704	1	2	2	0	0	0	1	0	0	1	29	0	0	1	3	40
d__Bacteria	k__norank_d__Bacteria	p__Bacteroidota	c__Bacteroidia	o__Sphingobacteriales	f__env.OPS_17	g__norank_f__env.OPS_17	s__unclassified_g__norank_f__env.OPS_17	OTU6141	0	0	0	0	0	0	0	0	0	1	0	0	0	0	0	1
d__Bacteria	k__norank_d__Bacteria	p__Proteobacteria	c__Alphaproteobacteria	o__Rickettsiales	f__Rickettsiaceae	g__unclassified_f__Rickettsiaceae	s__unclassified_f__Rickettsiaceae	OTU1051	0	0	0	3	0	0	0	0	0	0	0	0	0	0	0	3
d__Bacteria	k__norank_d__Bacteria	p__Proteobacteria	c__Gammaproteobacteria	o__Burkholderiales	f__Oxalobacteraceae	g__unclassified_f__Oxalobacteraceae	s__unclassified_f__Oxalobacteraceae	OTU2676	0	0	0	0	0	0	0	0	4	0	0	0	0	0	0	4
d__Bacteria	k__norank_d__Bacteria	p__Actinobacteriota	c__Actinobacteria	o__Streptomycetales	f__Streptomycetaceae	g__Streptomyces	s__unclassified_g__Streptomyces	OTU3149	315	418	1407	389	169	288	290	513	412	1336	1098	2305	60	310	683	9993
d__Bacteria	k__norank_d__Bacteria	p__Acidobacteriota	c__Vicinamibacteria	o__Vicinamibacterales	f__norank_o__Vicinamibacterales	g__norank_f__norank_o__Vicinamibacterales	s__metagenome_g__norank_f__norank_o__Vicinamibacterales	OTU6041	2	4	1	1	7	0	1	0	0	1	0	0	0	0	5	22
d__Bacteria	k__norank_d__Bacteria	p__Myxococcota	c__Polyangia	o__Haliangiales	f__Haliangiaceae	g__Haliangium	s__unclassified_g__Haliangium	OTU1218	0	1	1	4	2	2	2	0	0	0	3	0	0	0	2	17
d__Bacteria	k__norank_d__Bacteria	p__Proteobacteria	c__Gammaproteobacteria	o__Diplorickettsiales	f__Diplorickettsiaceae	g__norank_f__Diplorickettsiaceae	s__unclassified_g__norank_f__Diplorickettsiaceae	OTU986	0	0	0	2	0	0	0	0	0	0	0	0	0	0	0	2
d__Bacteria	k__norank_d__Bacteria	p__Chloroflexi	c__AD3	o__norank_c__AD3	f__norank_o__norank_c__AD3	g__norank_f__norank_o__norank_c__AD3	s__unclassified_g__norank_f__norank_o__norank_c__AD3	OTU3804	0	12	5	5	2	6	2	2	25	1	8	23	11	1	0	103
d__Bacteria	k__norank_d__Bacteria	p__Myxococcota	c__Polyangia	o__Polyangiales	f__Phaselicystidaceae	g__Phaselicystis	s__metagenome_g__Phaselicystis	OTU6179	0	0	0	0	0	0	0	0	0	0	0	0	0	0	4	4
d__Bacteria	k__norank_d__Bacteria	p__Gemmatimonadota	c__Longimicrobia	o__Longimicrobiales	f__Longimicrobiaceae	g__norank_f__Longimicrobiaceae	s__uncultured_bacterium_g__norank_f__Longimicrobiaceae	OTU6003	0	0	1	0	0	0	2	0	1	1	3	0	4	3	1	16
d__Bacteria	k__norank_d__Bacteria	p__Proteobacteria	c__Gammaproteobacteria	o__Diplorickettsiales	f__Diplorickettsiaceae	g__norank_f__Diplorickettsiaceae	s__unclassified_g__norank_f__Diplorickettsiaceae	OTU988	0	0	0	2	0	0	0	0	0	0	0	0	0	0	0	2
d__Bacteria	k__norank_d__Bacteria	p__Chloroflexi	c__TK10	o__norank_c__TK10	f__norank_o__norank_c__TK10	g__norank_f__norank_o__norank_c__TK10	s__bacterium_Ellin6519	OTU844	12	22	18	24	20	19	37	17	29	18	28	30	8	12	11	305
d__Bacteria	k__norank_d__Bacteria	p__Chloroflexi	c__Ktedonobacteria	o__Ktedonobacterales	f__Ktedonobacteraceae	g__Thermosporothrix	s__uncultured_bacterium_g__Thermosporothrix	OTU604	0	0	5	0	0	0	0	0	0	0	0	0	0	0	0	5
d__Bacteria	k__norank_d__Bacteria	p__Bacteroidota	c__Bacteroidia	o__Cytophagales	f__Microscillaceae	g__norank_f__Microscillaceae	s__unclassified_g__norank_f__Microscillaceae	OTU5662	0	0	0	0	0	0	0	0	0	1	0	0	0	0	3	4
d__Bacteria	k__norank_d__Bacteria	p__Proteobacteria	c__Alphaproteobacteria	o__Rhodobacterales	f__Rhodobacteraceae	g__Rubellimicrobium	s__uncultured_bacterium_g__Rubellimicrobium	OTU5147	0	0	0	0	0	0	0	0	0	0	1	0	0	0	0	1
d__Bacteria	k__norank_d__Bacteria	p__Actinobacteriota	c__Actinobacteria	o__Micrococcales	f__Micrococcaceae	g__Renibacterium	s__unclassified_g__Renibacterium	OTU3478	0	0	0	0	0	0	0	0	0	0	4	0	1	0	0	5
d__Bacteria	k__norank_d__Bacteria	p__Acidobacteriota	c__Acidobacteriae	o__Subgroup_13	f__norank_o__Subgroup_13	g__norank_f__norank_o__Subgroup_13	s__unclassified_g__norank_f__norank_o__Subgroup_13	OTU122	3	0	0	0	0	0	0	0	0	0	0	0	0	0	1	4
d__Bacteria	k__norank_d__Bacteria	p__Myxococcota	c__Polyangia	o__Polyangiales	f__Sandaracinaceae	g__norank_f__Sandaracinaceae	s__metagenome_g__norank_f__Sandaracinaceae	OTU1688	2	6	2	3	2	0	0	12	0	12	6	2	3	2	32	84
d__Bacteria	k__norank_d__Bacteria	p__Proteobacteria	c__Gammaproteobacteria	o__Diplorickettsiales	f__Diplorickettsiaceae	g__norank_f__Diplorickettsiaceae	s__metagenome_g__norank_f__Diplorickettsiaceae	OTU1443	0	0	0	0	0	2	0	0	1	0	0	0	0	0	0	3
d__Bacteria	k__norank_d__Bacteria	p__Cyanobacteria	c__Cyanobacteriia	o__Oxyphotobacteria_Incertae_Sedis	f__unclassified_o__Oxyphotobacteria_Incertae_Sedis	g__Leptolyngbya_ANT.L52.2	s__uncultured_bacterium_g__Leptolyngbya_ANT.L52.2	OTU5725	0	0	0	0	0	0	0	0	0	2	0	0	0	0	0	2
d__Bacteria	k__norank_d__Bacteria	p__Bacteroidota	c__Bacteroidia	o__Bacteroidales	f__Prevotellaceae	g__Prevotella	s__Prevotella_sp._oral_clone_DA058	OTU3501	0	0	0	0	0	0	0	0	1	0	3	0	0	0	0	4
d__Bacteria	k__norank_d__Bacteria	p__Armatimonadota	c__Chthonomonadetes	o__Chthonomonadales	f__Chthonomonadaceae	g__Chthonomonas	s__uncultured_bacterium_g__Chthonomonas	OTU4430	4	1	4	1	9	1	0	0	3	1	1	4	0	2	1	32
d__Bacteria	k__norank_d__Bacteria	p__Verrucomicrobiota	c__Verrucomicrobiae	o__Opitutales	f__Opitutaceae	g__Lacunisphaera	s__uncultured_bacterium_g__Lacunisphaera	OTU4691	0	0	0	0	0	0	0	0	0	0	0	0	1	0	0	1
d__Bacteria	k__norank_d__Bacteria	p__Verrucomicrobiota	c__Verrucomicrobiae	o__Chthoniobacterales	f__Chthoniobacteraceae	g__Chthoniobacter	s__metagenome_g__Chthoniobacter	OTU5672	0	0	3	0	3	0	0	0	0	0	1	1	0	0	0	8
d__Bacteria	k__norank_d__Bacteria	p__Verrucomicrobiota	c__Chlamydiae	o__Chlamydiales	f__Parachlamydiaceae	g__unclassified_f__Parachlamydiaceae	s__unclassified_f__Parachlamydiaceae	OTU1347	0	0	0	0	1	0	0	1	0	0	0	0	0	0	0	2
d__Bacteria	k__norank_d__Bacteria	p__Acidobacteriota	c__Acidobacteriae	o__norank_c__Acidobacteriae	f__norank_o__norank_c__Acidobacteriae	g__Paludibaculum	s__metagenome_g__Paludibaculum	OTU140	5	1	0	0	0	0	0	1	0	72	10	0	0	1	4	94
d__Bacteria	k__norank_d__Bacteria	p__Actinobacteriota	c__Acidimicrobiia	o__norank_c__Acidimicrobiia	f__norank_o__norank_c__Acidimicrobiia	g__norank_f__norank_o__norank_c__Acidimicrobiia	s__uncultured_bacterium_g__norank_f__norank_o__norank_c__Acidimicrobiia	OTU3065	0	0	0	0	0	0	0	0	0	13	1	0	1	2	0	17
d__Bacteria	k__norank_d__Bacteria	p__Firmicutes	c__Bacilli	o__Lactobacillales	f__Lactobacillaceae	g__Lactobacillus	s__Lactobacillus_paralimentarius	OTU6273	0	0	0	0	0	0	0	0	3	0	0	0	0	0	0	3
d__Bacteria	k__norank_d__Bacteria	p__Acidobacteriota	c__Vicinamibacteria	o__Vicinamibacterales	f__Vicinamibacteraceae	g__norank_f__Vicinamibacteraceae	s__unclassified_g__norank_f__Vicinamibacteraceae	OTU5570	0	2	0	1	0	0	1	0	0	1	1	0	0	1	3	10
d__Bacteria	k__norank_d__Bacteria	p__Chloroflexi	c__Ktedonobacteria	o__Ktedonobacterales	f__Ktedonobacteraceae	g__HSB_OF53-F07	s__uncultured_bacterium_g__HSB_OF53-F07	OTU5494	0	0	0	0	0	0	1	1	2	0	0	0	0	0	1	5
d__Bacteria	k__norank_d__Bacteria	p__Verrucomicrobiota	c__Verrucomicrobiae	o__Chthoniobacterales	f__Chthoniobacteraceae	g__Chthoniobacter	s__unclassified_g__Chthoniobacter	OTU722	11	1	33	13	7	8	39	10	15	0	3	9	8	2	2	161
d__Bacteria	k__norank_d__Bacteria	p__Chloroflexi	c__Ktedonobacteria	o__Ktedonobacterales	f__JG30-KF-AS9	g__norank_f__JG30-KF-AS9	s__unclassified_g__norank_f__JG30-KF-AS9	OTU3701	0	3	0	0	0	0	0	0	0	0	0	0	0	0	0	3
d__Bacteria	k__norank_d__Bacteria	p__Bacteroidota	c__Bacteroidia	o__Flavobacteriales	f__Flavobacteriaceae	g__Flavobacterium	s__unclassified_g__Flavobacterium	OTU2634	0	0	1	0	0	0	0	0	3	1	0	0	0	0	0	5
d__Bacteria	k__norank_d__Bacteria	p__Verrucomicrobiota	c__Verrucomicrobiae	o__Chthoniobacterales	f__Xiphinematobacteraceae	g__Candidatus_Xiphinematobacter	s__uncultured_bacterium_g__Candidatus_Xiphinematobacter	OTU3578	0	0	0	0	0	0	2	0	3	0	0	1	0	0	0	6
d__Bacteria	k__norank_d__Bacteria	p__Planctomycetota	c__Planctomycetes	o__Gemmatales	f__Gemmataceae	g__norank_f__Gemmataceae	s__unclassified_g__norank_f__Gemmataceae	OTU2803	1	2	0	3	0	2	2	9	6	0	2	1	1	1	0	30
d__Bacteria	k__norank_d__Bacteria	p__Armatimonadota	c__Chthonomonadetes	o__Chthonomonadales	f__Chthonomonadaceae	g__Chthonomonas	s__uncultured_bacterium_g__Chthonomonas	OTU975	3	0	1	3	1	4	0	0	10	0	1	0	0	0	0	23
d__Bacteria	k__norank_d__Bacteria	p__Gemmatimonadota	c__Gemmatimonadetes	o__Gemmatimonadales	f__Gemmatimonadaceae	g__norank_f__Gemmatimonadaceae	s__uncultured_bacterium_g__norank_f__Gemmatimonadaceae	OTU5630	0	0	0	0	0	0	0	0	0	1	0	0	0	0	4	5
d__Bacteria	k__norank_d__Bacteria	p__Proteobacteria	c__Gammaproteobacteria	o__Diplorickettsiales	f__Diplorickettsiaceae	g__norank_f__Diplorickettsiaceae	s__uncultured_bacterium_g__norank_f__Diplorickettsiaceae	OTU4492	0	0	0	0	0	0	0	0	1	0	0	1	0	0	0	2
d__Bacteria	k__norank_d__Bacteria	p__RCP2-54	c__norank_p__RCP2-54	o__norank_c__norank_p__RCP2-54	f__norank_o__norank_c__norank_p__RCP2-54	g__norank_f__norank_o__norank_c__norank_p__RCP2-54	s__unclassified_g__norank_f__norank_o__norank_c__norank_p__RCP2-54	OTU1419	0	0	3	0	0	3	0	0	0	0	0	0	0	0	0	6
d__Bacteria	k__norank_d__Bacteria	p__Actinobacteriota	c__Actinobacteria	o__Propionibacteriales	f__Propionibacteriaceae	g__Microlunatus	s__Microlunatus_soli	OTU3823	0	0	0	0	0	0	0	1	0	0	0	0	0	0	0	1
d__Bacteria	k__norank_d__Bacteria	p__Verrucomicrobiota	c__Chlamydiae	o__Chlamydiales	f__Simkaniaceae	g__unclassified_f__Simkaniaceae	s__unclassified_f__Simkaniaceae	OTU614	0	1	2	0	0	0	0	0	0	0	0	0	0	0	0	3
d__Bacteria	k__norank_d__Bacteria	p__Verrucomicrobiota	c__Verrucomicrobiae	o__Pedosphaerales	f__Pedosphaeraceae	g__norank_f__Pedosphaeraceae	s__uncultured_Prosthecobacter_sp._g__norank	OTU5856	1	1	4	1	2	5	0	1	2	0	0	3	0	1	0	21
d__Bacteria	k__norank_d__Bacteria	p__Firmicutes	c__unclassified_p__Firmicutes	o__unclassified_p__Firmicutes	f__unclassified_p__Firmicutes	g__unclassified_p__Firmicutes	s__unclassified_p__Firmicutes	OTU4253	0	0	0	0	0	0	0	0	0	0	0	1	0	0	0	1
d__Bacteria	k__norank_d__Bacteria	p__Dependentiae	c__Babeliae	o__Babeliales	f__norank_o__Babeliales	g__norank_f__norank_o__Babeliales	s__uncultured_bacterium_g__norank_f__norank_o__Babeliales	OTU1577	0	0	1	0	1	2	0	0	0	0	0	2	0	0	0	6
d__Bacteria	k__norank_d__Bacteria	p__Bacteroidota	c__Bacteroidia	o__Flavobacteriales	f__Flavobacteriaceae	g__Flavobacterium	s__unclassified_g__Flavobacterium	OTU5609	0	0	0	0	0	0	0	0	0	2	0	0	0	0	2	4
d__Bacteria	k__norank_d__Bacteria	p__Firmicutes	c__Symbiobacteriia	o__Symbiobacteriales	f__Symbiobacteraceae	g__norank_f__Symbiobacteraceae	s__unclassified_g__norank_f__Symbiobacteraceae	OTU778	3	0	1	1	0	0	0	0	0	0	0	0	0	0	0	5
d__Bacteria	k__norank_d__Bacteria	p__Myxococcota	c__Polyangia	o__Polyangiales	f__Polyangiaceae	g__Pajaroellobacter	s__uncultured_Polyangiaceae_bacterium_g__Pajaroellobacter	OTU6385	30	49	62	23	85	90	79	88	99	3	22	39	70	53	38	830
d__Bacteria	k__norank_d__Bacteria	p__Proteobacteria	c__Gammaproteobacteria	o__Legionellales	f__Legionellaceae	g__Legionella	s__uncultured_bacterium_g__Legionella	OTU3299	0	3	0	0	0	0	0	0	0	0	1	0	0	0	0	4
d__Bacteria	k__norank_d__Bacteria	p__Bacteroidota	c__Bacteroidia	o__Cytophagales	f__Microscillaceae	g__norank_f__Microscillaceae	s__unclassified_g__norank_f__Microscillaceae	OTU3907	2	0	1	0	0	0	0	0	0	25	14	0	0	0	3	45
d__Bacteria	k__norank_d__Bacteria	p__Desulfobacterota	c__Desulfuromonadia	o__PB19	f__norank_o__PB19	g__norank_f__norank_o__PB19	s__metagenome_g__norank_f__norank_o__PB19	OTU3176	0	0	0	0	0	0	0	0	0	2	0	0	0	0	0	2
d__Bacteria	k__norank_d__Bacteria	p__Actinobacteriota	c__Acidimicrobiia	o__IMCC26256	f__norank_o__IMCC26256	g__norank_f__norank_o__IMCC26256	s__uncultured_bacterium_g__norank_f__norank_o__IMCC26256	OTU2731	20	22	12	7	28	13	3	7	16	14	11	14	4	15	7	193
d__Bacteria	k__norank_d__Bacteria	p__Patescibacteria	c__Saccharimonadia	o__Saccharimonadales	f__unclassified_o__Saccharimonadales	g__unclassified_o__Saccharimonadales	s__unclassified_o__Saccharimonadales	OTU72	7	0	0	0	0	0	0	0	0	0	0	0	0	0	0	7
d__Bacteria	k__norank_d__Bacteria	p__Proteobacteria	c__Gammaproteobacteria	o__Diplorickettsiales	f__Diplorickettsiaceae	g__norank_f__Diplorickettsiaceae	s__uncultured_Coxiellaceae_bacterium_g__norank_f__Diplorickettsiaceae	OTU2283	0	0	0	0	0	0	30	4	18	0	0	1	1	0	1	55
d__Bacteria	k__norank_d__Bacteria	p__Patescibacteria	c__Parcubacteria	o__norank_c__Parcubacteria	f__norank_o__norank_c__Parcubacteria	g__norank_f__norank_o__norank_c__Parcubacteria	s__uncultured_bacterium_g__norank_f__norank_o__norank_c__Parcubacteria	OTU1251	0	0	0	0	3	0	0	0	0	1	0	0	0	0	0	4
d__Bacteria	k__norank_d__Bacteria	p__Actinobacteriota	c__Thermoleophilia	o__Gaiellales	f__norank_o__Gaiellales	g__norank_f__norank_o__Gaiellales	s__unclassified_g__norank_f__norank_o__Gaiellales	OTU6163	1	0	0	0	0	0	0	0	0	4	4	2	0	2	0	13
d__Bacteria	k__norank_d__Bacteria	p__Proteobacteria	c__Gammaproteobacteria	o__Diplorickettsiales	f__Diplorickettsiaceae	g__Aquicella	s__unclassified_g__Aquicella	OTU4110	0	0	0	0	0	0	0	0	0	0	1	0	0	1	0	2
d__Bacteria	k__norank_d__Bacteria	p__Acidobacteriota	c__Acidobacteriae	o__Acidobacteriales	f__Acidobacteriaceae_Subgroup_1	g__Occallatibacter	s__uncultured_bacterium_g__Occallatibacter	OTU1940	111	169	208	154	353	253	790	190	460	6	35	172	319	36	53	3309
d__Bacteria	k__norank_d__Bacteria	p__Nitrospirota	c__Nitrospiria	o__Nitrospirales	f__Nitrospiraceae	g__Nitrospira	s__unclassified_g__Nitrospira	OTU6419	2	5	8	1	0	0	0	0	3	18	3	1	0	4	3	48
d__Bacteria	k__norank_d__Bacteria	p__Verrucomicrobiota	c__Chlamydiae	o__Chlamydiales	f__unclassified_o__Chlamydiales	g__unclassified_o__Chlamydiales	s__unclassified_o__Chlamydiales	OTU5349	0	0	0	1	0	0	0	0	0	0	0	1	2	1	0	5
d__Bacteria	k__norank_d__Bacteria	p__Armatimonadota	c__Chthonomonadetes	o__Chthonomonadales	f__Chthonomonadaceae	g__Chthonomonas	s__uncultured_bacterium_g__Chthonomonas	OTU361	0	6	1	1	0	6	0	4	0	0	0	0	0	0	0	18
d__Bacteria	k__norank_d__Bacteria	p__Chloroflexi	c__JG30-KF-CM66	o__norank_c__JG30-KF-CM66	f__norank_o__norank_c__JG30-KF-CM66	g__norank_f__norank_o__norank_c__JG30-KF-CM66	s__uncultured_Caldilinea_sp._g__norank	OTU1093	0	8	3	9	28	26	9	13	19	0	0	1	3	1	0	120
d__Bacteria	k__norank_d__Bacteria	p__Chloroflexi	c__Ktedonobacteria	o__Ktedonobacterales	f__JG30-KF-AS9	g__norank_f__JG30-KF-AS9	s__uncultured_bacterium_g__norank_f__JG30-KF-AS9	OTU2074	0	0	0	0	0	1	1	2	0	0	0	0	0	0	0	4
d__Bacteria	k__norank_d__Bacteria	p__Chloroflexi	c__Ktedonobacteria	o__Ktedonobacterales	f__JG30-KF-AS9	g__norank_f__JG30-KF-AS9	s__unclassified_g__norank_f__JG30-KF-AS9	OTU897	5	3	6	24	16	36	14	31	33	0	2	0	6	3	0	179
d__Bacteria	k__norank_d__Bacteria	p__Planctomycetota	c__Planctomycetes	o__Isosphaerales	f__Isosphaeraceae	g__unclassified_f__Isosphaeraceae	s__unclassified_f__Isosphaeraceae	OTU1405	9	14	23	14	12	22	59	27	29	1	0	6	32	6	0	254
d__Bacteria	k__norank_d__Bacteria	p__Actinobacteriota	c__Thermoleophilia	o__Solirubrobacterales	f__67-14	g__norank_f__67-14	s__uncultured_bacterium_g__norank_f__67-14	OTU5397	0	0	0	0	0	0	0	0	0	5	0	0	0	1	0	6
d__Bacteria	k__norank_d__Bacteria	p__Proteobacteria	c__Gammaproteobacteria	o__KF-JG30-C25	f__norank_o__KF-JG30-C25	g__norank_f__norank_o__KF-JG30-C25	s__uncultured_bacterium_g__norank_f__norank_o__KF-JG30-C25	OTU3026	2	0	0	0	0	0	0	0	0	2	2	0	0	0	1	7
d__Bacteria	k__norank_d__Bacteria	p__Armatimonadota	c__Chthonomonadetes	o__Chthonomonadales	f__Chthonomonadaceae	g__Chthonomonas	s__uncultured_bacterium_g__Chthonomonas	OTU2295	0	1	0	0	0	1	0	0	2	0	0	0	2	0	0	6
d__Bacteria	k__norank_d__Bacteria	p__MBNT15	c__norank_p__MBNT15	o__norank_c__norank_p__MBNT15	f__norank_o__norank_c__norank_p__MBNT15	g__norank_f__norank_o__norank_c__norank_p__MBNT15	s__unclassified_g__norank_f__norank_o__norank_c__norank_p__MBNT15	OTU4628	0	0	0	0	0	0	0	0	0	0	0	0	0	2	0	2
d__Bacteria	k__norank_d__Bacteria	p__Verrucomicrobiota	c__Chlamydiae	o__Chlamydiales	f__Simkaniaceae	g__norank_f__Simkaniaceae	s__uncultured_Chlamydiales_bacterium_g__norank	OTU1362	0	0	0	0	5	0	0	0	0	0	0	0	0	0	0	5
d__Bacteria	k__norank_d__Bacteria	p__Bacteroidota	c__Bacteroidia	o__Chitinophagales	f__Chitinophagaceae	g__Aurantisolimonas	s__uncultured_bacterium_g__Aurantisolimonas	OTU3174	0	2	0	0	0	0	0	2	0	16	3	0	0	0	0	23
d__Bacteria	k__norank_d__Bacteria	p__Chloroflexi	c__Chloroflexia	o__Elev-1554	f__norank_o__Elev-1554	g__norank_f__norank_o__Elev-1554	s__uncultured_bacterium_g__norank_f__norank_o__Elev-1554	OTU1855	0	0	0	0	0	0	4	0	0	0	0	0	0	0	0	4
d__Bacteria	k__norank_d__Bacteria	p__Proteobacteria	c__Gammaproteobacteria	o__Diplorickettsiales	f__Diplorickettsiaceae	g__norank_f__Diplorickettsiaceae	s__uncultured_gamma_proteobacterium_g__norank_f__Diplorickettsiaceae	OTU290	0	3	0	0	0	0	0	0	0	0	0	0	2	0	0	5
d__Bacteria	k__norank_d__Bacteria	p__Actinobacteriota	c__Actinobacteria	o__Pseudonocardiales	f__Pseudonocardiaceae	g__Pseudonocardia	s__unclassified_g__Pseudonocardia	OTU5956	2	5	16	17	1	5	9	47	0	3	0	0	3	6	7	121
d__Bacteria	k__norank_d__Bacteria	p__Bdellovibrionota	c__Oligoflexia	o__0319-6G20	f__norank_o__0319-6G20	g__norank_f__norank_o__0319-6G20	s__uncultured_bacterium_g__norank_f__norank_o__0319-6G20	OTU4251	0	0	0	0	0	0	0	0	0	0	0	0	0	2	0	2
d__Bacteria	k__norank_d__Bacteria	p__Verrucomicrobiota	c__Chlamydiae	o__Chlamydiales	f__Simkaniaceae	g__norank_f__Simkaniaceae	s__unclassified_g__norank_f__Simkaniaceae	OTU2036	0	0	0	0	0	0	1	0	0	0	0	0	0	0	0	1
d__Bacteria	k__norank_d__Bacteria	p__Bdellovibrionota	c__Bdellovibrionia	o__Bdellovibrionales	f__Bdellovibrionaceae	g__Bdellovibrio	s__unclassified_g__Bdellovibrio	OTU2588	3	1	0	0	2	2	3	3	3	1	0	1	1	1	0	21
d__Bacteria	k__norank_d__Bacteria	p__Chloroflexi	c__Ktedonobacteria	o__Ktedonobacterales	f__Ktedonobacteraceae	g__norank_f__Ktedonobacteraceae	s__uncultured_Thermosporothrix_sp._g__norank	OTU927	0	1	2	2	4	0	6	0	0	0	0	0	1	0	0	16
d__Bacteria	k__norank_d__Bacteria	p__Myxococcota	c__Myxococcia	o__Myxococcales	f__Myxococcaceae	g__norank_f__Myxococcaceae	s__uncultured_bacterium_g__norank_f__Myxococcaceae	OTU1170	3	0	0	1	2	7	0	0	1	0	0	0	2	3	0	19
d__Bacteria	k__norank_d__Bacteria	p__Bdellovibrionota	c__Oligoflexia	o__Silvanigrellales	f__Silvanigrellaceae	g__Silvanigrella	s__unclassified_g__Silvanigrella	OTU4879	0	0	0	0	0	0	0	0	0	0	0	0	2	0	0	2
d__Bacteria	k__norank_d__Bacteria	p__Proteobacteria	c__Alphaproteobacteria	o__Rickettsiales	f__Mitochondria	g__norank_f__Mitochondria	s__unclassified_g__norank_f__Mitochondria	OTU384	0	0	2	0	0	0	0	0	0	0	0	0	0	0	0	2
d__Bacteria	k__norank_d__Bacteria	p__Acidobacteriota	c__Blastocatellia	o__Blastocatellales	f__Blastocatellaceae	g__JGI_0001001-H03	s__uncultured_bacterium_g__JGI_0001001-H03	OTU6548	15	1	11	1	1	0	3	0	4	12	6	10	5	1	3	73
d__Bacteria	k__norank_d__Bacteria	p__Proteobacteria	c__Alphaproteobacteria	o__Rhodospirillales	f__Magnetospirillaceae	g__Telmatospirillum	s__unclassified_g__Telmatospirillum	OTU417	0	0	3	0	0	0	0	0	0	0	0	0	0	5	0	8
d__Bacteria	k__norank_d__Bacteria	p__Bacteroidota	c__Bacteroidia	o__Chitinophagales	f__Chitinophagaceae	g__norank_f__Chitinophagaceae	s__unclassified_g__norank_f__Chitinophagaceae	OTU5610	3	0	13	6	3	7	0	0	3	19	36	2	1	0	5	98
d__Bacteria	k__norank_d__Bacteria	p__Bacteroidota	c__Kapabacteria	o__Kapabacteriales	f__norank_o__Kapabacteriales	g__norank_f__norank_o__Kapabacteriales	s__uncultured_bacterium_KF-JG30-B11	OTU5963	1	0	0	1	0	0	0	0	0	0	0	0	0	0	0	2
d__Bacteria	k__norank_d__Bacteria	p__Planctomycetota	c__Phycisphaerae	o__Phycisphaerales	f__Phycisphaeraceae	g__SM1A02	s__uncultured_planctomycete_g__SM1A02	OTU98	2	0	0	0	0	0	0	0	0	2	0	0	0	0	0	4
d__Bacteria	k__norank_d__Bacteria	p__Verrucomicrobiota	c__Chlamydiae	o__Chlamydiales	f__Parachlamydiaceae	g__Neochlamydia	s__uncultured_bacterium_g__Neochlamydia	OTU556	0	0	2	0	0	0	0	0	0	0	0	0	0	0	0	2
d__Bacteria	k__norank_d__Bacteria	p__Proteobacteria	c__Gammaproteobacteria	o__Burkholderiales	f__Nitrosomonadaceae	g__Ellin6067	s__unclassified_g__Ellin6067	OTU6455	51	31	62	3	26	14	6	12	17	85	63	87	7	36	7	507
d__Bacteria	k__norank_d__Bacteria	p__Chloroflexi	c__Chloroflexia	o__Thermomicrobiales	f__JG30-KF-CM45	g__norank_f__JG30-KF-CM45	s__uncultured_bacterium_g__norank_f__JG30-KF-CM45	OTU3511	0	0	0	0	0	0	0	0	0	0	3	1	0	0	0	4
d__Bacteria	k__norank_d__Bacteria	p__Bdellovibrionota	c__Oligoflexia	o__0319-6G20	f__norank_o__0319-6G20	g__norank_f__norank_o__0319-6G20	s__unclassified_g__norank_f__norank_o__0319-6G20	OTU990	0	0	0	7	3	16	0	1	0	0	0	0	1	0	0	28
d__Bacteria	k__norank_d__Bacteria	p__Firmicutes	c__Bacilli	o__Staphylococcales	f__Staphylococcaceae	g__Staphylococcus	s__unclassified_g__Staphylococcus	OTU3249	31	35	199	50	169	15	63	22	61	1	582	1	178	27	9	1443
d__Bacteria	k__norank_d__Bacteria	p__Planctomycetota	c__Planctomycetes	o__Gemmatales	f__Gemmataceae	g__norank_f__Gemmataceae	s__unclassified_g__norank_f__Gemmataceae	OTU836	0	4	2	0	4	1	4	5	0	0	0	2	1	0	1	24
d__Bacteria	k__norank_d__Bacteria	p__Acidobacteriota	c__Acidobacteriae	o__Bryobacterales	f__Bryobacteraceae	g__Bryobacter	s__uncultured_Acidobacteria_bacterium_g__Bryobacter	OTU1949	46	94	25	87	234	280	198	107	256	19	122	31	81	129	10	1719
d__Bacteria	k__norank_d__Bacteria	p__Myxococcota	c__Polyangia	o__Polyangiales	f__Phaselicystidaceae	g__Phaselicystis	s__unclassified_g__Phaselicystis	OTU3524	0	5	0	0	0	0	0	0	0	1	5	0	0	4	0	15
d__Bacteria	k__norank_d__Bacteria	p__Proteobacteria	c__Gammaproteobacteria	o__Burkholderiales	f__Burkholderiaceae	g__Limnobacter	s__uncultured_bacterium_g__Limnobacter	OTU3090	0	0	0	0	0	0	0	0	0	13	0	0	0	0	0	13
d__Bacteria	k__norank_d__Bacteria	p__Actinobacteriota	c__Acidimicrobiia	o__norank_c__Acidimicrobiia	f__norank_o__norank_c__Acidimicrobiia	g__norank_f__norank_o__norank_c__Acidimicrobiia	s__uncultured_forest_soil_bacterium_g__norank_f__norank_o__norank_c__Acidimicrobiia	OTU857	19	26	22	37	100	67	41	82	40	1	8	3	16	5	3	470
d__Bacteria	k__norank_d__Bacteria	p__Proteobacteria	c__Gammaproteobacteria	o__Diplorickettsiales	f__Diplorickettsiaceae	g__norank_f__Diplorickettsiaceae	s__unclassified_g__norank_f__Diplorickettsiaceae	OTU4844	0	0	0	0	0	0	0	0	1	5	22	1	2	0	3	34
d__Bacteria	k__norank_d__Bacteria	p__Verrucomicrobiota	c__Verrucomicrobiae	o__Pedosphaerales	f__Pedosphaeraceae	g__DEV008	s__uncultured_Verrucomicrobia_bacterium_g__DEV008	OTU277	0	3	0	0	0	0	0	0	0	0	1	0	0	0	0	4
d__Bacteria	k__norank_d__Bacteria	p__Dependentiae	c__Babeliae	o__Babeliales	f__norank_o__Babeliales	g__norank_f__norank_o__Babeliales	s__uncultured_bacterium_g__norank_f__norank_o__Babeliales	OTU4874	0	0	0	0	2	3	2	0	0	0	0	0	1	0	0	8
d__Bacteria	k__norank_d__Bacteria	p__Proteobacteria	c__Gammaproteobacteria	o__Diplorickettsiales	f__Diplorickettsiaceae	g__norank_f__Diplorickettsiaceae	s__uncultured_bacterium_g__norank_f__Diplorickettsiaceae	OTU6099	0	0	0	0	0	0	0	0	0	1	0	0	0	0	0	1
d__Bacteria	k__norank_d__Bacteria	p__Chloroflexi	c__Anaerolineae	o__SBR1031	f__norank_o__SBR1031	g__norank_f__norank_o__SBR1031	s__unclassified_g__norank_f__norank_o__SBR1031	OTU4336	0	3	0	0	0	0	0	0	0	0	0	10	0	0	0	13
d__Bacteria	k__norank_d__Bacteria	p__Firmicutes	c__Clostridia	o__Peptostreptococcales-Tissierellales	f__norank_o__Peptostreptococcales-Tissierellales	g__Peptoniphilus	s__uncultured_organism_g__Peptoniphilus	OTU5099	10	2	23	10	36	1	10	3	6	0	141	0	13	1	0	256
d__Bacteria	k__norank_d__Bacteria	p__Elusimicrobiota	c__Elusimicrobia	o__Lineage_IV	f__norank_o__Lineage_IV	g__norank_f__norank_o__Lineage_IV	s__uncultured_bacterium_g__norank_f__norank_o__Lineage_IV	OTU4459	0	0	0	0	0	0	0	0	1	0	0	0	0	0	0	1
d__Bacteria	k__norank_d__Bacteria	p__Chloroflexi	c__TK10	o__norank_c__TK10	f__norank_o__norank_c__TK10	g__norank_f__norank_o__norank_c__TK10	s__uncultured_soil_bacterium_g__norank_f__norank_o__norank_c__TK10	OTU5700	0	1	14	0	4	0	0	0	1	0	0	1	0	0	0	21
d__Bacteria	k__norank_d__Bacteria	p__Acidobacteriota	c__Vicinamibacteria	o__Vicinamibacterales	f__norank_o__Vicinamibacterales	g__norank_f__norank_o__Vicinamibacterales	s__unclassified_g__norank_f__norank_o__Vicinamibacterales	OTU4395	0	0	7	1	0	0	0	0	0	1	0	0	0	0	0	9
d__Bacteria	k__norank_d__Bacteria	p__Acidobacteriota	c__Vicinamibacteria	o__Vicinamibacterales	f__norank_o__Vicinamibacterales	g__norank_f__norank_o__Vicinamibacterales	s__unclassified_g__norank_f__norank_o__Vicinamibacterales	OTU4133	0	0	0	0	0	0	0	0	0	3	1	1	0	0	2	7
d__Bacteria	k__norank_d__Bacteria	p__Cyanobacteria	c__Vampirivibrionia	o__Vampirovibrionales	f__norank_o__Vampirovibrionales	g__norank_f__norank_o__Vampirovibrionales	s__uncultured_bacterium_g__norank_f__norank_o__Vampirovibrionales	OTU318	0	5	0	0	0	0	0	0	0	0	0	0	0	0	0	5
d__Bacteria	k__norank_d__Bacteria	p__Proteobacteria	c__Alphaproteobacteria	o__Micropepsales	f__Micropepsaceae	g__norank_f__Micropepsaceae	s__unclassified_g__norank_f__Micropepsaceae	OTU375	75	50	102	22	59	17	18	19	39	25	17	14	11	30	15	513
d__Bacteria	k__norank_d__Bacteria	p__Verrucomicrobiota	c__Verrucomicrobiae	o__Pedosphaerales	f__Pedosphaeraceae	g__norank_f__Pedosphaeraceae	s__uncultured_bacterium_g__norank_f__Pedosphaeraceae	OTU5156	0	0	8	4	0	0	7	19	1	0	0	0	1	0	0	40
d__Bacteria	k__norank_d__Bacteria	p__Chloroflexi	c__Anaerolineae	o__SBR1031	f__norank_o__SBR1031	g__norank_f__norank_o__SBR1031	s__uncultured_Gemmatimonadetes_bacterium_g__norank_f__norank	OTU3588	0	7	0	0	2	8	0	0	2	0	2	3	0	1	0	25
d__Bacteria	k__norank_d__Bacteria	p__Proteobacteria	c__Gammaproteobacteria	o__Burkholderiales	f__Comamonadaceae	g__unclassified_f__Comamonadaceae	s__unclassified_f__Comamonadaceae	OTU5383	0	0	0	0	0	0	0	1	2	11	0	0	0	6	8	28
d__Bacteria	k__norank_d__Bacteria	p__Proteobacteria	c__Gammaproteobacteria	o__Burkholderiales	f__Burkholderiaceae	g__Burkholderia-Caballeronia-Paraburkholderia	s__unclassified_g__Burkholderia-Caballeronia-Paraburkholderia	OTU739	2755	603	3795	2074	1726	781	867	153	97	10	41	231	36	202	109	13480
d__Bacteria	k__norank_d__Bacteria	p__Proteobacteria	c__Gammaproteobacteria	o__unclassified_c__Gammaproteobacteria	f__unclassified_c__Gammaproteobacteria	g__unclassified_c__Gammaproteobacteria	s__unclassified_c__Gammaproteobacteria	OTU3486	0	0	0	0	2	0	1	0	0	0	6	0	0	0	0	9
d__Bacteria	k__norank_d__Bacteria	p__Firmicutes	c__Clostridia	o__Clostridiales	f__Clostridiaceae	g__Clostridium_sensu_stricto_11	s__unclassified_g__Clostridium_sensu_stricto_11	OTU751	0	0	0	0	0	0	0	0	0	0	0	0	0	0	2	2
d__Bacteria	k__norank_d__Bacteria	p__Bdellovibrionota	c__Oligoflexia	o__0319-6G20	f__norank_o__0319-6G20	g__norank_f__norank_o__0319-6G20	s__unclassified_g__norank_f__norank_o__0319-6G20	OTU1371	0	0	0	0	2	0	0	0	0	0	0	0	0	0	0	2
d__Bacteria	k__norank_d__Bacteria	p__Chloroflexi	c__Chloroflexia	o__Chloroflexales	f__Roseiflexaceae	g__norank_f__Roseiflexaceae	s__unclassified_g__norank_f__Roseiflexaceae	OTU2912	0	0	0	0	0	0	0	0	0	3	0	0	0	0	0	3
d__Bacteria	k__norank_d__Bacteria	p__Verrucomicrobiota	c__Verrucomicrobiae	o__Pedosphaerales	f__Pedosphaeraceae	g__unclassified_f__Pedosphaeraceae	s__unclassified_f__Pedosphaeraceae	OTU4578	0	0	0	0	0	0	0	0	0	1	0	0	0	0	0	1
d__Bacteria	k__norank_d__Bacteria	p__Chloroflexi	c__Ktedonobacteria	o__Ktedonobacterales	f__Ktedonobacteraceae	g__1921-2	s__uncultured_bacterium_g__1921-2	OTU4466	0	0	0	0	0	0	0	0	0	0	0	1	0	0	0	1
d__Bacteria	k__norank_d__Bacteria	p__Cyanobacteria	c__Cyanobacteriia	o__Cyanobacteriales	f__Coleofasciculaceae	g__Microcoleus_Es-Yyy1400	s__Microcoleus_paludosus_Es_Yyy1400	OTU6258	0	0	0	0	0	0	0	0	0	0	1	4	0	0	3	8
d__Bacteria	k__norank_d__Bacteria	p__Bacteroidota	c__Bacteroidia	o__Chitinophagales	f__Chitinophagaceae	g__norank_f__Chitinophagaceae	s__unclassified_g__norank_f__Chitinophagaceae	OTU3348	0	0	0	0	0	0	0	0	0	0	1	0	0	0	1	2
d__Bacteria	k__norank_d__Bacteria	p__Chloroflexi	c__Anaerolineae	o__SBR1031	f__norank_o__SBR1031	g__norank_f__norank_o__SBR1031	s__unclassified_g__norank_f__norank_o__SBR1031	OTU4490	0	0	0	0	0	0	0	0	0	1	3	0	0	0	0	4
d__Bacteria	k__norank_d__Bacteria	p__Chloroflexi	c__Anaerolineae	o__SBR1031	f__norank_o__SBR1031	g__norank_f__norank_o__SBR1031	s__unclassified_g__norank_f__norank_o__SBR1031	OTU4494	0	2	0	0	0	2	0	0	0	0	2	4	1	1	0	12
d__Bacteria	k__norank_d__Bacteria	p__Proteobacteria	c__Alphaproteobacteria	o__Defluviicoccales	f__Defluviicoccaceae	g__Defluviicoccus	s__unclassified_g__Defluviicoccus	OTU3025	0	0	0	0	0	0	0	0	0	9	0	0	0	0	0	9
d__Bacteria	k__norank_d__Bacteria	p__Planctomycetota	c__Planctomycetes	o__Gemmatales	f__Gemmataceae	g__norank_f__Gemmataceae	s__unclassified_g__norank_f__Gemmataceae	OTU1386	0	0	0	0	0	2	2	0	0	0	0	0	0	0	0	4
d__Bacteria	k__norank_d__Bacteria	p__Planctomycetota	c__Planctomycetes	o__Gemmatales	f__Gemmataceae	g__norank_f__Gemmataceae	s__unclassified_g__norank_f__Gemmataceae	OTU1385	0	0	1	0	0	1	0	0	1	0	0	0	0	0	0	3
d__Bacteria	k__norank_d__Bacteria	p__Proteobacteria	c__Alphaproteobacteria	o__Micropepsales	f__Micropepsaceae	g__norank_f__Micropepsaceae	s__uncultured_bacterium_g__norank_f__Micropepsaceae	OTU2401	0	0	3	1	6	6	0	5	7	0	0	0	1	0	2	31
d__Bacteria	k__norank_d__Bacteria	p__Proteobacteria	c__Gammaproteobacteria	o__Diplorickettsiales	f__Diplorickettsiaceae	g__norank_f__Diplorickettsiaceae	s__unclassified_g__norank_f__Diplorickettsiaceae	OTU5399	0	0	0	0	0	0	0	0	1	0	0	0	0	1	0	2
d__Bacteria	k__norank_d__Bacteria	p__Proteobacteria	c__Gammaproteobacteria	o__Salinisphaerales	f__Solimonadaceae	g__Polycyclovorans	s__unclassified_g__Polycyclovorans	OTU3195	2	2	0	0	0	0	0	0	0	17	0	0	0	0	1	22
d__Bacteria	k__norank_d__Bacteria	p__Firmicutes	c__Bacilli	o__Bacillales	f__Bacillaceae	g__norank_f__Bacillaceae	s__uncultured_bacterium_g__norank_f__Bacillaceae	OTU5583	1	2	5	0	0	1	1	2	0	1	18	1	1	0	75	108
d__Bacteria	k__norank_d__Bacteria	p__Actinobacteriota	c__Actinobacteria	o__Catenulisporales	f__Actinospicaceae	g__Actinospica	s__unclassified_g__Actinospica	OTU1404	0	0	0	0	0	1	0	0	0	0	0	0	0	0	0	1
d__Bacteria	k__norank_d__Bacteria	p__Verrucomicrobiota	c__Verrucomicrobiae	o__Pedosphaerales	f__Pedosphaeraceae	g__unclassified_f__Pedosphaeraceae	s__unclassified_f__Pedosphaeraceae	OTU4611	0	0	0	0	0	0	0	0	0	0	0	0	0	1	0	1
d__Bacteria	k__norank_d__Bacteria	p__Myxococcota	c__Polyangia	o__Polyangiales	f__Polyangiaceae	g__Pajaroellobacter	s__unclassified_g__Pajaroellobacter	OTU3165	2	0	0	0	0	0	0	0	0	7	0	0	0	3	1	13
d__Bacteria	k__norank_d__Bacteria	p__Proteobacteria	c__Gammaproteobacteria	o__Diplorickettsiales	f__Diplorickettsiaceae	g__Aquicella	s__uncultured_bacterium_g__Aquicella	OTU989	0	0	0	2	0	0	0	0	0	0	0	0	0	0	0	2
d__Bacteria	k__norank_d__Bacteria	p__Proteobacteria	c__Gammaproteobacteria	o__Diplorickettsiales	f__Diplorickettsiaceae	g__norank_f__Diplorickettsiaceae	s__unclassified_g__norank_f__Diplorickettsiaceae	OTU1479	0	0	0	0	0	1	0	0	0	0	0	0	0	0	0	1
d__Bacteria	k__norank_d__Bacteria	p__Armatimonadota	c__Armatimonadia	o__Armatimonadales	f__norank_o__Armatimonadales	g__norank_f__norank_o__Armatimonadales	s__uncultured_bacterium_g__norank_f__norank_o__Armatimonadales	OTU6575	2	0	3	0	0	0	1	0	0	0	1	0	0	0	0	7
d__Bacteria	k__norank_d__Bacteria	p__Acidobacteriota	c__Acidobacteriae	o__Subgroup_2	f__norank_o__Subgroup_2	g__norank_f__norank_o__Subgroup_2	s__uncultured_Acidobacteria_bacterium_g__norank_f__norank_o__Subgroup_2	OTU6450	2	1	1	0	11	0	0	0	3	0	9	4	0	7	1	39
d__Bacteria	k__norank_d__Bacteria	p__Armatimonadota	c__Armatimonadia	o__Armatimonadales	f__norank_o__Armatimonadales	g__norank_f__norank_o__Armatimonadales	s__uncultured_bacterium_g__norank_f__norank_o__Armatimonadales	OTU6570	0	1	3	9	6	0	4	5	22	0	0	0	2	1	0	53
d__Bacteria	k__norank_d__Bacteria	p__Acidobacteriota	c__Acidobacteriae	o__Subgroup_13	f__norank_o__Subgroup_13	g__norank_f__norank_o__Subgroup_13	s__uncultured_bacterium_g__norank_f__norank_o__Subgroup_13	OTU6505	1	2	18	17	15	19	14	15	30	0	9	2	6	2	2	152
d__Bacteria	k__norank_d__Bacteria	p__Actinobacteriota	c__Acidimicrobiia	o__norank_c__Acidimicrobiia	f__norank_o__norank_c__Acidimicrobiia	g__norank_f__norank_o__norank_c__Acidimicrobiia	s__uncultured_Acidimicrobiia_bacterium_g__norank	OTU3013	1	1	16	0	0	0	0	1	0	49	8	0	0	0	7	83
d__Bacteria	k__norank_d__Bacteria	p__Verrucomicrobiota	c__Chlamydiae	o__Chlamydiales	f__unclassified_o__Chlamydiales	g__unclassified_o__Chlamydiales	s__unclassified_o__Chlamydiales	OTU3404	0	0	0	0	1	0	0	1	1	0	9	0	0	0	0	12
d__Bacteria	k__norank_d__Bacteria	p__Proteobacteria	c__Gammaproteobacteria	o__Diplorickettsiales	f__Diplorickettsiaceae	g__norank_f__Diplorickettsiaceae	s__unclassified_g__norank_f__Diplorickettsiaceae	OTU2301	0	0	0	0	0	4	0	0	2	0	0	0	0	0	0	6
d__Bacteria	k__norank_d__Bacteria	p__Chloroflexi	c__Ktedonobacteria	o__Ktedonobacterales	f__JG30-KF-AS9	g__norank_f__JG30-KF-AS9	s__uncultured_bacterium_g__norank_f__JG30-KF-AS9	OTU2687	0	0	0	0	0	0	0	0	2	0	0	0	0	0	0	2
d__Bacteria	k__norank_d__Bacteria	p__Myxococcota	c__Polyangia	o__Haliangiales	f__Haliangiaceae	g__Haliangium	s__uncultured_bacterium_g__Haliangium	OTU5239	0	0	0	0	0	0	0	0	0	0	0	0	0	8	0	8
d__Bacteria	k__norank_d__Bacteria	p__Chloroflexi	c__Ktedonobacteria	o__Ktedonobacterales	f__Ktedonobacteraceae	g__HSB_OF53-F07	s__unclassified_g__HSB_OF53-F07	OTU5024	0	0	0	0	0	4	1	0	0	0	0	0	2	0	0	7
d__Bacteria	k__norank_d__Bacteria	p__Proteobacteria	c__Alphaproteobacteria	o__Sphingomonadales	f__Sphingomonadaceae	g__unclassified_f__Sphingomonadaceae	s__unclassified_f__Sphingomonadaceae	OTU4944	1	4	9	14	1	1	6	8	1	14	41	5	4	5	12	126
d__Bacteria	k__norank_d__Bacteria	p__Patescibacteria	c__Saccharimonadia	o__Saccharimonadales	f__WWH38	g__norank_f__WWH38	s__uncultured_bacterium_g__norank_f__WWH38	OTU2872	0	0	0	0	0	0	0	0	0	3	0	0	0	0	0	3
d__Bacteria	k__norank_d__Bacteria	p__Actinobacteriota	c__Thermoleophilia	o__Solirubrobacterales	f__unclassified_o__Solirubrobacterales	g__unclassified_o__Solirubrobacterales	s__unclassified_o__Solirubrobacterales	OTU2151	0	0	0	0	0	0	1	0	0	0	0	0	0	0	0	1
d__Bacteria	k__norank_d__Bacteria	p__Proteobacteria	c__Gammaproteobacteria	o__unclassified_c__Gammaproteobacteria	f__unclassified_c__Gammaproteobacteria	g__unclassified_c__Gammaproteobacteria	s__unclassified_c__Gammaproteobacteria	OTU1248	0	0	0	0	1	0	0	0	0	0	0	0	0	0	0	1
d__Bacteria	k__norank_d__Bacteria	p__Proteobacteria	c__Alphaproteobacteria	o__Rhizobiales	f__Beijerinckiaceae	g__Methylovirgula	s__uncultured_bacterium_g__Methylovirgula	OTU1157	39	85	24	175	222	413	355	228	78	2	18	54	288	13	23	2017
d__Bacteria	k__norank_d__Bacteria	p__Gemmatimonadota	c__Gemmatimonadetes	o__Gemmatimonadales	f__Gemmatimonadaceae	g__Gemmatimonas	s__unclassified_g__Gemmatimonas	OTU692	3	0	5	0	0	0	0	0	1	8	0	0	0	2	13	32
d__Bacteria	k__norank_d__Bacteria	p__Acidobacteriota	c__Blastocatellia	o__Blastocatellales	f__Blastocatellaceae	g__Blastocatella	s__unclassified_g__Blastocatella	OTU2922	0	0	0	0	0	0	0	0	0	1	0	0	3	0	0	4
d__Bacteria	k__norank_d__Bacteria	p__Chloroflexi	c__Ktedonobacteria	o__Ktedonobacterales	f__Ktedonobacteraceae	g__HSB_OF53-F07	s__unclassified_g__HSB_OF53-F07	OTU4958	0	0	0	0	0	0	0	0	0	0	0	0	1	0	0	1
d__Bacteria	k__norank_d__Bacteria	p__Proteobacteria	c__Alphaproteobacteria	o__Rickettsiales	f__Rickettsiaceae	g__Rickettsia	s__unclassified_g__Rickettsia	OTU937	0	0	1	3	3	1	1	0	0	0	0	0	2	0	0	11
d__Bacteria	k__norank_d__Bacteria	p__Acidobacteriota	c__Vicinamibacteria	o__Vicinamibacterales	f__norank_o__Vicinamibacterales	g__norank_f__norank_o__Vicinamibacterales	s__uncultured_Acidobacteria_bacterium_g__norank_f__norank_o__Vicinamibacterales	OTU4180	0	0	3	0	0	0	0	0	2	0	0	0	0	0	0	5
d__Bacteria	k__norank_d__Bacteria	p__Verrucomicrobiota	c__Verrucomicrobiae	o__Pedosphaerales	f__Pedosphaeraceae	g__unclassified_f__Pedosphaeraceae	s__unclassified_f__Pedosphaeraceae	OTU3736	0	0	0	0	1	3	3	1	2	0	0	0	0	0	0	10
d__Bacteria	k__norank_d__Bacteria	p__Armatimonadota	c__Armatimonadia	o__Armatimonadales	f__norank_o__Armatimonadales	g__norank_f__norank_o__Armatimonadales	s__uncultured_bacterium_g__norank_f__norank_o__Armatimonadales	OTU1339	3	0	0	0	1	0	0	0	0	1	0	0	0	0	2	7
d__Bacteria	k__norank_d__Bacteria	p__Actinobacteriota	c__Actinobacteria	o__Frankiales	f__Acidothermaceae	g__Acidothermus	s__uncultured_actinobacterium_g__Acidothermus	OTU6466	35	38	23	76	31	151	54	93	147	1	21	21	174	25	5	895
d__Bacteria	k__norank_d__Bacteria	p__Planctomycetota	c__Planctomycetes	o__Isosphaerales	f__Isosphaeraceae	g__Aquisphaera	s__unclassified_g__Aquisphaera	OTU753	24	40	25	52	48	56	117	101	107	4	9	34	109	5	2	733
d__Bacteria	k__norank_d__Bacteria	p__Proteobacteria	c__Alphaproteobacteria	o__Caulobacterales	f__Caulobacteraceae	g__norank_f__Caulobacteraceae	s__unclassified_g__norank_f__Caulobacteraceae	OTU141	5	0	0	0	0	0	0	0	0	1	0	0	0	1	2	9
d__Bacteria	k__norank_d__Bacteria	p__Patescibacteria	c__Saccharimonadia	o__Saccharimonadales	f__norank_o__Saccharimonadales	g__norank_f__norank_o__Saccharimonadales	s__unclassified_g__norank_f__norank_o__Saccharimonadales	OTU847	0	2	0	1	0	0	3	1	2	0	0	0	0	0	0	9
d__Bacteria	k__norank_d__Bacteria	p__Acidobacteriota	c__Vicinamibacteria	o__Subgroup_17	f__norank_o__Subgroup_17	g__norank_f__norank_o__Subgroup_17	s__uncultured_Acidobacteria_bacterium_g__norank_f__norank_o__Subgroup_17	OTU4403	1	4	0	0	0	0	0	0	0	0	2	0	0	2	0	9
d__Bacteria	k__norank_d__Bacteria	p__Patescibacteria	c__Saccharimonadia	o__Saccharimonadales	f__LWQ8	g__norank_f__LWQ8	s__unclassified_g__norank_f__LWQ8	OTU5076	5	9	2	1	17	2	6	5	4	0	0	0	54	11	2	118
d__Bacteria	k__norank_d__Bacteria	p__Chloroflexi	c__Chloroflexia	o__Thermomicrobiales	f__Thermomicrobiaceae	g__Nitrolancea	s__uncultured_bacterium_g__Nitrolancea	OTU3922	0	2	0	0	0	1	3	0	0	30	23	53	14	1	1	128
d__Bacteria	k__norank_d__Bacteria	p__Firmicutes	c__Bacilli	o__Paenibacillales	f__Paenibacillaceae	g__Paenibacillus	s__unclassified_g__Paenibacillus	OTU3300	0	0	0	0	0	0	0	0	0	0	5	0	0	0	0	5
d__Bacteria	k__norank_d__Bacteria	p__Planctomycetota	c__Planctomycetes	o__Isosphaerales	f__Isosphaeraceae	g__norank_f__Isosphaeraceae	s__unclassified_g__norank_f__Isosphaeraceae	OTU14	5	1	2	1	1	1	11	7	2	0	0	1	3	0	0	35
d__Bacteria	k__norank_d__Bacteria	p__Actinobacteriota	c__Thermoleophilia	o__Solirubrobacterales	f__Solirubrobacteraceae	g__Conexibacter	s__unclassified_g__Conexibacter	OTU1467	1	2	6	3	9	9	13	8	11	1	6	2	8	1	1	81
d__Bacteria	k__norank_d__Bacteria	p__Actinobacteriota	c__Actinobacteria	o__Micrococcales	f__Microbacteriaceae	g__Agromyces	s__unclassified_g__Agromyces	OTU3320	1	0	4	0	0	0	0	0	0	20	10	0	0	0	57	92
d__Bacteria	k__norank_d__Bacteria	p__Acidobacteriota	c__Acidobacteriae	o__Acidobacteriales	f__Acidobacteriaceae_Subgroup_1	g__Acidicapsa	s__unclassified_g__Acidicapsa	OTU3576	116	185	173	450	361	293	365	392	51	0	0	69	92	6	34	2587
d__Bacteria	k__norank_d__Bacteria	p__Acidobacteriota	c__Acidobacteriae	o__Bryobacterales	f__Bryobacteraceae	g__Bryobacter	s__uncultured_Acidobacteria_bacterium_g__Bryobacter	OTU159	4	29	3	4	4	10	4	5	67	0	46	5	2	10	2	195
d__Bacteria	k__norank_d__Bacteria	p__Firmicutes	c__Bacilli	o__Paenibacillales	f__Paenibacillaceae	g__unclassified_f__Paenibacillaceae	s__unclassified_f__Paenibacillaceae	OTU3557	0	0	0	0	0	0	0	0	0	1	0	1	0	0	5	7
d__Bacteria	k__norank_d__Bacteria	p__Chloroflexi	c__Anaerolineae	o__SBR1031	f__A4b	g__norank_f__A4b	s__wastewater_metagenome_g__norank_f__A4b	OTU3948	68	4	35	1	3	0	2	2	0	24	20	9	0	19	60	247
d__Bacteria	k__norank_d__Bacteria	p__Gemmatimonadota	c__Gemmatimonadetes	o__Gemmatimonadales	f__Gemmatimonadaceae	g__Gemmatimonas	s__uncultured_bacterium_g__Gemmatimonas	OTU1375	0	0	0	0	5	8	9	3	7	0	4	0	0	0	0	36
d__Bacteria	k__norank_d__Bacteria	p__Proteobacteria	c__Gammaproteobacteria	o__Coxiellales	f__Coxiellaceae	g__Coxiella	s__uncultured_bacterium_g__Coxiella	OTU3280	0	0	0	0	0	0	0	0	0	0	2	0	0	0	0	2
d__Bacteria	k__norank_d__Bacteria	p__Bdellovibrionota	c__Bdellovibrionia	o__Bdellovibrionales	f__Bdellovibrionaceae	g__Bdellovibrio	s__uncultured_bacterium_g__Bdellovibrio	OTU6117	0	0	0	0	0	0	0	0	0	1	0	0	0	0	0	1
d__Bacteria	k__norank_d__Bacteria	p__Patescibacteria	c__Parcubacteria	o__Candidatus_Jorgensenbacteria	f__norank_o__Candidatus_Jorgensenbacteria	g__norank_f__norank_o__Candidatus_Jorgensenbacteria	s__Candidatus_Adlerbacteria_bacterium_GW2011_GWC1_50_9	OTU5950	0	0	0	0	0	1	1	0	0	0	0	0	1	0	0	3
d__Bacteria	k__norank_d__Bacteria	p__Firmicutes	c__Bacilli	o__Paenibacillales	f__Paenibacillaceae	g__norank_f__Paenibacillaceae	s__uncultured_Paenibacillus_sp._g__norank	OTU242	0	4	0	0	0	0	0	1	1	0	0	0	0	0	0	6
d__Bacteria	k__norank_d__Bacteria	p__unclassified_k__norank_d__Bacteria	c__unclassified_k__norank_d__Bacteria	o__unclassified_k__norank_d__Bacteria	f__unclassified_k__norank_d__Bacteria	g__unclassified_k__norank_d__Bacteria	s__unclassified_k__norank_d__Bacteria	OTU1295	0	0	0	0	2	0	0	0	0	0	0	0	0	0	0	2
d__Bacteria	k__norank_d__Bacteria	p__Planctomycetota	c__OM190	o__norank_c__OM190	f__norank_o__norank_c__OM190	g__norank_f__norank_o__norank_c__OM190	s__uncultured_bacterium_g__norank_f__norank_o__norank_c__OM190	OTU4313	0	1	0	0	0	0	0	0	0	0	1	0	0	1	0	3
d__Bacteria	k__norank_d__Bacteria	p__Actinobacteriota	c__Thermoleophilia	o__Solirubrobacterales	f__Solirubrobacteraceae	g__Solirubrobacter	s__metagenome_g__Solirubrobacter	OTU3127	32	65	24	7	3	2	2	15	0	55	23	2	2	7	8	247
d__Bacteria	k__norank_d__Bacteria	p__Actinobacteriota	c__Actinobacteria	o__Propionibacteriales	f__Propionibacteriaceae	g__Friedmanniella	s__uncultured_bacterium_g__Friedmanniella	OTU1061	0	1	0	1	0	0	1	0	0	0	0	0	0	0	0	3
d__Bacteria	k__norank_d__Bacteria	p__Actinobacteriota	c__Actinobacteria	o__unclassified_c__Actinobacteria	f__unclassified_c__Actinobacteria	g__unclassified_c__Actinobacteria	s__unclassified_c__Actinobacteria	OTU1047	0	0	0	4	0	0	0	1	0	0	0	0	0	0	0	5
d__Bacteria	k__norank_d__Bacteria	p__Chloroflexi	c__Chloroflexia	o__Chloroflexales	f__Roseiflexaceae	g__norank_f__Roseiflexaceae	s__uncultured_bacterium_g__norank_f__Roseiflexaceae	OTU5543	0	0	0	0	0	0	0	0	2	0	0	0	0	0	1	3
d__Bacteria	k__norank_d__Bacteria	p__Bacteroidota	c__Bacteroidia	o__Sphingobacteriales	f__AKYH767	g__norank_f__AKYH767	s__unclassified_g__norank_f__AKYH767	OTU4328	0	0	0	0	0	0	0	0	0	4	0	0	0	0	1	5
d__Bacteria	k__norank_d__Bacteria	p__Chloroflexi	c__Ktedonobacteria	o__Ktedonobacterales	f__JG30-KF-AS9	g__norank_f__JG30-KF-AS9	s__uncultured_bacterium_g__norank_f__JG30-KF-AS9	OTU1485	1	1	1	10	0	4	0	3	2	0	6	0	0	1	0	29
d__Bacteria	k__norank_d__Bacteria	p__Gemmatimonadota	c__Gemmatimonadetes	o__Gemmatimonadales	f__Gemmatimonadaceae	g__Gemmatimonas	s__uncultured_bacterium_g__Gemmatimonas	OTU3028	0	0	2	0	0	0	0	0	0	8	0	0	0	1	0	11
d__Bacteria	k__norank_d__Bacteria	p__Firmicutes	c__Bacilli	o__Paenibacillales	f__Paenibacillaceae	g__Paenibacillus	s__Paenibacillus_favisporus	OTU48	2	0	1	0	0	2	3	1	0	0	0	0	0	3	0	12
d__Bacteria	k__norank_d__Bacteria	p__Firmicutes	c__Clostridia	o__norank_c__Clostridia	f__unclassified_o__norank_c__Clostridia	g__unclassified_o__norank_c__Clostridia	s__unclassified_o__norank_c__Clostridia	OTU2833	0	0	1	0	0	0	0	0	2	0	0	0	0	0	0	3
d__Bacteria	k__norank_d__Bacteria	p__Acidobacteriota	c__Vicinamibacteria	o__Vicinamibacterales	f__norank_o__Vicinamibacterales	g__norank_f__norank_o__Vicinamibacterales	s__unclassified_g__norank_f__norank_o__Vicinamibacterales	OTU598	2	0	3	0	0	0	0	1	0	5	7	1	0	0	3	22
d__Bacteria	k__norank_d__Bacteria	p__Acidobacteriota	c__Acidobacteriae	o__Bryobacterales	f__Bryobacteraceae	g__Bryobacter	s__uncultured_Acidobacteria_bacterium_g__Bryobacter	OTU5050	6	17	9	12	61	82	54	46	70	10	7	26	24	13	4	441
d__Bacteria	k__norank_d__Bacteria	p__Armatimonadota	c__Fimbriimonadia	o__Fimbriimonadales	f__Fimbriimonadaceae	g__norank_f__Fimbriimonadaceae	s__unclassified_g__norank_f__Fimbriimonadaceae	OTU4300	0	0	2	0	0	0	0	0	0	1	0	0	0	1	0	4
d__Bacteria	k__norank_d__Bacteria	p__Acidobacteriota	c__Vicinamibacteria	o__Vicinamibacterales	f__Vicinamibacteraceae	g__norank_f__Vicinamibacteraceae	s__unclassified_g__norank_f__Vicinamibacteraceae	OTU5511	3	4	2	0	0	2	1	0	0	21	55	1	0	3	15	107
d__Bacteria	k__norank_d__Bacteria	p__Abditibacteriota	c__Abditibacteria	o__Abditibacteriales	f__Abditibacteriaceae	g__Abditibacterium	s__unclassified_g__Abditibacterium	OTU1511	0	2	0	0	0	2	0	0	0	0	0	0	0	0	0	4
d__Bacteria	k__norank_d__Bacteria	p__Chloroflexi	c__Ktedonobacteria	o__B10-SB3A	f__norank_o__B10-SB3A	g__norank_f__norank_o__B10-SB3A	s__uncultured_bacterium_g__norank_f__norank_o__B10-SB3A	OTU1895	0	0	0	0	0	0	3	0	0	0	0	0	0	0	0	3
d__Bacteria	k__norank_d__Bacteria	p__Firmicutes	c__Bacilli	o__unclassified_c__Bacilli	f__unclassified_c__Bacilli	g__unclassified_c__Bacilli	s__unclassified_c__Bacilli	OTU5242	0	3	0	0	0	0	0	0	2	0	0	1	0	7	1	14
d__Bacteria	k__norank_d__Bacteria	p__Chloroflexi	c__Ktedonobacteria	o__Ktedonobacterales	f__JG30-KF-AS9	g__norank_f__JG30-KF-AS9	s__Chloroflexi_bacterium_Ellin7237	OTU6091	8	1	1	5	0	9	7	8	11	0	3	1	0	0	0	54
d__Bacteria	k__norank_d__Bacteria	p__Actinobacteriota	c__Acidimicrobiia	o__IMCC26256	f__norank_o__IMCC26256	g__norank_f__norank_o__IMCC26256	s__uncultured_Acidimicrobiia_bacterium_g__norank_f__norank	OTU5430	0	0	0	0	1	0	0	0	0	9	5	1	0	0	4	20
d__Bacteria	k__norank_d__Bacteria	p__Proteobacteria	c__Gammaproteobacteria	o__PLTA13	f__norank_o__PLTA13	g__norank_f__norank_o__PLTA13	s__metagenome_g__norank_f__norank_o__PLTA13	OTU2251	0	0	0	0	0	0	0	0	0	3	0	0	0	0	23	26
d__Bacteria	k__norank_d__Bacteria	p__Proteobacteria	c__Alphaproteobacteria	o__Rhizobiales	f__Beijerinckiaceae	g__Psychroglaciecola	s__uncultured_bacterium_g__Psychroglaciecola	OTU5069	0	5	0	4	0	0	0	0	0	0	4	0	9	0	0	22
d__Bacteria	k__norank_d__Bacteria	p__Chloroflexi	c__Ktedonobacteria	o__Ktedonobacterales	f__JG30-KF-AS9	g__norank_f__JG30-KF-AS9	s__unclassified_g__norank_f__JG30-KF-AS9	OTU6137	0	2	0	0	0	1	1	0	0	0	0	0	0	0	0	4
d__Bacteria	k__norank_d__Bacteria	p__Bacteroidota	c__Bacteroidia	o__Cytophagales	f__Spirosomaceae	g__Spirosoma	s__Spirosoma_knui	OTU3526	0	0	0	0	0	0	0	0	0	0	6	0	0	0	0	6
d__Bacteria	k__norank_d__Bacteria	p__Myxococcota	c__Myxococcia	o__Myxococcales	f__Myxococcaceae	g__P3OB-42	s__unclassified_g__P3OB-42	OTU5294	0	0	0	0	0	0	0	0	0	1	0	0	0	2	0	3
d__Bacteria	k__norank_d__Bacteria	p__Chloroflexi	c__Anaerolineae	o__SBR1031	f__norank_o__SBR1031	g__norank_f__norank_o__SBR1031	s__uncultured_soil_bacterium_g__norank_f__norank_o__SBR1031	OTU427	1	1	8	1	0	0	0	0	0	1	0	0	0	0	0	12
d__Bacteria	k__norank_d__Bacteria	p__Bacteroidota	c__Bacteroidia	o__Chitinophagales	f__Chitinophagaceae	g__Edaphobaculum	s__metagenome_g__Edaphobaculum	OTU24	5	0	5	0	0	0	0	1	0	0	0	0	0	0	1	12
d__Bacteria	k__norank_d__Bacteria	p__Armatimonadota	c__Fimbriimonadia	o__Fimbriimonadales	f__Fimbriimonadaceae	g__norank_f__Fimbriimonadaceae	s__unclassified_g__norank_f__Fimbriimonadaceae	OTU3330	0	0	0	0	0	0	3	0	0	0	6	0	0	1	0	10
d__Bacteria	k__norank_d__Bacteria	p__Acidobacteriota	c__Vicinamibacteria	o__Vicinamibacterales	f__Vicinamibacteraceae	g__Vicinamibacter	s__uncultured_bacterium_g__Vicinamibacter	OTU5309	9	4	14	0	1	0	0	0	0	10	11	0	3	8	71	131
d__Bacteria	k__norank_d__Bacteria	p__Proteobacteria	c__Gammaproteobacteria	o__Diplorickettsiales	f__Diplorickettsiaceae	g__norank_f__Diplorickettsiaceae	s__unclassified_g__norank_f__Diplorickettsiaceae	OTU1390	0	0	0	2	1	1	1	3	0	0	3	0	0	0	0	11
d__Bacteria	k__norank_d__Bacteria	p__Gemmatimonadota	c__Gemmatimonadetes	o__Gemmatimonadales	f__Gemmatimonadaceae	g__norank_f__Gemmatimonadaceae	s__uncultured_bacterium_g__norank_f__Gemmatimonadaceae	OTU5381	0	1	0	0	0	0	0	0	2	1	0	0	0	5	0	9
d__Bacteria	k__norank_d__Bacteria	p__Dependentiae	c__Babeliae	o__Babeliales	f__unclassified_o__Babeliales	g__unclassified_o__Babeliales	s__unclassified_o__Babeliales	OTU4153	6	0	0	0	0	0	0	0	0	1	0	0	0	0	0	7
d__Bacteria	k__norank_d__Bacteria	p__Cyanobacteria	c__Sericytochromatia	o__norank_c__Sericytochromatia	f__norank_o__norank_c__Sericytochromatia	g__norank_f__norank_o__norank_c__Sericytochromatia	s__CyanobacteriaMelainabacteria_group_bacterium_S15B-MN24_CBMW_12	OTU3900	0	0	4	0	0	0	0	0	0	2	0	1	0	5	1	13
d__Bacteria	k__norank_d__Bacteria	p__Bacteroidota	c__Bacteroidia	o__Chitinophagales	f__Chitinophagaceae	g__norank_f__Chitinophagaceae	s__uncultured_bacterium_g__norank_f__Chitinophagaceae	OTU6277	0	0	0	0	0	0	0	0	0	2	0	0	0	0	0	2
d__Bacteria	k__norank_d__Bacteria	p__Firmicutes	c__Clostridia	o__Oscillospirales	f__Ruminococcaceae	g__Candidatus_Soleaferrea	s__uncultured_Clostridiales_bacterium_g__Candidatus_Soleaferrea	OTU2675	0	0	0	0	0	0	0	0	2	0	0	0	0	0	0	2
d__Bacteria	k__norank_d__Bacteria	p__Planctomycetota	c__Planctomycetes	o__Isosphaerales	f__Isosphaeraceae	g__unclassified_f__Isosphaeraceae	s__unclassified_f__Isosphaeraceae	OTU674	1	0	2	0	3	2	5	3	1	0	0	0	0	0	0	17
d__Bacteria	k__norank_d__Bacteria	p__RCP2-54	c__norank_p__RCP2-54	o__norank_c__norank_p__RCP2-54	f__norank_o__norank_c__norank_p__RCP2-54	g__norank_f__norank_o__norank_c__norank_p__RCP2-54	s__unclassified_g__norank_f__norank_o__norank_c__norank_p__RCP2-54	OTU4684	2	4	2	0	0	0	1	0	2	16	27	0	2	6	6	68
d__Bacteria	k__norank_d__Bacteria	p__Firmicutes	c__Bacilli	o__Bacillales	f__Bacillaceae	g__unclassified_f__Bacillaceae	s__unclassified_f__Bacillaceae	OTU6036	4	0	2	0	0	0	0	0	0	26	4	4	2	1	7	50
d__Bacteria	k__norank_d__Bacteria	p__Chloroflexi	c__TK10	o__norank_c__TK10	f__norank_o__norank_c__TK10	g__norank_f__norank_o__norank_c__TK10	s__unclassified_g__norank_f__norank_o__norank_c__TK10	OTU146	30	94	51	65	34	110	56	39	134	11	37	46	8	24	9	748
d__Bacteria	k__norank_d__Bacteria	p__Actinobacteriota	c__Actinobacteria	o__Micrococcales	f__Microbacteriaceae	g__Agromyces	s__unclassified_g__Agromyces	OTU294	0	3	0	0	0	0	0	0	0	0	0	0	0	0	0	3
d__Bacteria	k__norank_d__Bacteria	p__Proteobacteria	c__Gammaproteobacteria	o__Cellvibrionales	f__Cellvibrionaceae	g__Cellvibrio	s__metagenome_g__Cellvibrio	OTU6338	0	1	0	3	0	0	1	0	0	0	0	0	0	0	0	5
d__Bacteria	k__norank_d__Bacteria	p__Proteobacteria	c__Alphaproteobacteria	o__Paracaedibacterales	f__Paracaedibacteraceae	g__norank_f__Paracaedibacteraceae	s__unclassified_g__norank_f__Paracaedibacteraceae	OTU1922	2	4	7	2	7	1	1	0	7	0	0	0	1	4	2	38
d__Bacteria	k__norank_d__Bacteria	p__Proteobacteria	c__Gammaproteobacteria	o__Burkholderiales	f__Nitrosomonadaceae	g__mle1-7	s__uncultured_soil_bacterium_g__mle1-7	OTU4338	0	0	0	0	0	0	0	0	0	0	0	0	0	1	0	1
d__Bacteria	k__norank_d__Bacteria	p__Planctomycetota	c__Planctomycetes	o__Gemmatales	f__Gemmataceae	g__norank_f__Gemmataceae	s__unclassified_g__norank_f__Gemmataceae	OTU4455	0	1	0	0	1	2	11	0	0	0	0	0	0	0	0	15
d__Bacteria	k__norank_d__Bacteria	p__Patescibacteria	c__Saccharimonadia	o__Saccharimonadales	f__unclassified_o__Saccharimonadales	g__unclassified_o__Saccharimonadales	s__unclassified_o__Saccharimonadales	OTU1544	0	0	0	0	4	2	0	1	0	0	0	0	0	0	0	7
d__Bacteria	k__norank_d__Bacteria	p__Patescibacteria	c__Saccharimonadia	o__Saccharimonadales	f__norank_o__Saccharimonadales	g__norank_f__norank_o__Saccharimonadales	s__metal-contaminated_soil_clone_K20-27	OTU5395	0	0	0	0	0	0	0	0	0	0	0	0	0	1	0	1
d__Bacteria	k__norank_d__Bacteria	p__Proteobacteria	c__Alphaproteobacteria	o__Acetobacterales	f__Acetobacteraceae	g__Rhodovastum	s__metagenome_g__Rhodovastum	OTU126	8	11	12	4	17	11	9	4	1	20	26	36	4	8	0	171
d__Bacteria	k__norank_d__Bacteria	p__Proteobacteria	c__Gammaproteobacteria	o__Enterobacterales	f__Enterobacteriaceae	g__Escherichia-Shigella	s__Escherichia_coli_g__Escherichia-Shigella	OTU5181	5	2	14	0	7	1	0	0	0	0	36	0	0	0	0	65
d__Bacteria	k__norank_d__Bacteria	p__Verrucomicrobiota	c__Chlamydiae	o__Chlamydiales	f__Parachlamydiaceae	g__Neochlamydia	s__uncultured_bacterium_g__Neochlamydia	OTU2652	0	0	0	0	0	0	0	0	2	0	0	0	0	0	0	2
d__Bacteria	k__norank_d__Bacteria	p__Proteobacteria	c__Gammaproteobacteria	o__Coxiellales	f__Coxiellaceae	g__Coxiella	s__unclassified_g__Coxiella	OTU2608	2	0	0	6	0	3	0	0	2	0	0	0	0	0	0	13
d__Bacteria	k__norank_d__Bacteria	p__Bacteroidota	c__Bacteroidia	o__Chitinophagales	f__Chitinophagaceae	g__Edaphobaculum	s__unclassified_g__Edaphobaculum	OTU3857	0	1	11	0	0	0	0	0	0	2	3	0	0	0	0	17
d__Bacteria	k__norank_d__Bacteria	p__Actinobacteriota	c__Acidimicrobiia	o__norank_c__Acidimicrobiia	f__norank_o__norank_c__Acidimicrobiia	g__norank_f__norank_o__norank_c__Acidimicrobiia	s__uncultured_bacterium_g__norank_f__norank_o__norank_c__Acidimicrobiia	OTU2128	0	0	0	0	0	1	1	1	2	0	0	0	0	2	0	7
d__Bacteria	k__norank_d__Bacteria	p__Myxococcota	c__Polyangia	o__Polyangiales	f__Sandaracinaceae	g__norank_f__Sandaracinaceae	s__metagenome_g__norank_f__Sandaracinaceae	OTU407	0	5	4	0	0	0	0	5	0	4	2	1	0	0	0	21
d__Bacteria	k__norank_d__Bacteria	p__Bacteroidota	c__Bacteroidia	o__Sphingobacteriales	f__CWT_CU03-E12	g__norank_f__CWT_CU03-E12	s__uncultured_bacterium_g__norank_f__CWT_CU03-E12	OTU1416	0	0	0	0	1	2	2	0	1	0	0	0	1	0	0	7
d__Bacteria	k__norank_d__Bacteria	p__Elusimicrobiota	c__Lineage_IIa	o__norank_c__Lineage_IIa	f__norank_o__norank_c__Lineage_IIa	g__norank_f__norank_o__norank_c__Lineage_IIa	s__uncultured_bacterium_g__norank_f__norank_o__norank_c__Lineage_IIa	OTU1840	0	0	0	0	2	1	1	0	2	0	0	0	0	0	0	6
d__Bacteria	k__norank_d__Bacteria	p__Proteobacteria	c__Gammaproteobacteria	o__Burkholderiales	f__Neisseriaceae	g__norank_f__Neisseriaceae	s__unclassified_g__norank_f__Neisseriaceae	OTU1070	0	0	0	2	0	0	1	0	0	0	0	0	0	0	0	3
d__Bacteria	k__norank_d__Bacteria	p__Firmicutes	c__Clostridia	o__Lachnospirales	f__Lachnospiraceae	g__unclassified_f__Lachnospiraceae	s__unclassified_f__Lachnospiraceae	OTU2550	0	0	0	0	0	0	0	2	0	0	0	0	0	0	0	2
d__Bacteria	k__norank_d__Bacteria	p__Proteobacteria	c__Gammaproteobacteria	o__Diplorickettsiales	f__Diplorickettsiaceae	g__Aquicella	s__unclassified_g__Aquicella	OTU2729	0	0	3	0	0	0	1	0	13	0	0	1	0	0	0	18
d__Bacteria	k__norank_d__Bacteria	p__Patescibacteria	c__Microgenomatia	o__norank_c__Microgenomatia	f__norank_o__norank_c__Microgenomatia	g__norank_f__norank_o__norank_c__Microgenomatia	s__uncultured_candidate_division_WS6_bacterium_g__norank_f__norank_o__norank	OTU3912	0	0	0	0	0	0	0	0	0	1	0	1	0	0	0	2
d__Bacteria	k__norank_d__Bacteria	p__Dependentiae	c__Babeliae	o__Babeliales	f__Vermiphilaceae	g__norank_f__Vermiphilaceae	s__uncultured_bacterium_g__norank_f__Vermiphilaceae	OTU2437	1	0	0	0	2	1	3	2	3	0	0	0	0	0	0	12
d__Bacteria	k__norank_d__Bacteria	p__Planctomycetota	c__Planctomycetes	o__Isosphaerales	f__Isosphaeraceae	g__norank_f__Isosphaeraceae	s__uncultured_bacterium_g__norank_f__Isosphaeraceae	OTU2566	1	0	0	0	0	2	0	2	0	0	0	0	0	0	0	5
d__Bacteria	k__norank_d__Bacteria	p__Verrucomicrobiota	c__Chlamydiae	o__Chlamydiales	f__Parachlamydiaceae	g__Neochlamydia	s__uncultured_bacterium_g__Neochlamydia	OTU536	1	0	3	0	0	0	0	0	1	0	0	0	0	0	0	5
d__Bacteria	k__norank_d__Bacteria	p__Actinobacteriota	c__Thermoleophilia	o__Solirubrobacterales	f__67-14	g__norank_f__67-14	s__uncultured_bacterium_g__norank_f__67-14	OTU45	8	0	0	0	0	0	0	0	0	0	0	0	0	0	1	9
d__Bacteria	k__norank_d__Bacteria	p__Proteobacteria	c__Alphaproteobacteria	o__Reyranellales	f__Reyranellaceae	g__Reyranella	s__uncultured_bacterium_g__Reyranella	OTU429	2	0	3	0	0	0	0	1	0	10	11	0	0	1	3	31
d__Bacteria	k__norank_d__Bacteria	p__Verrucomicrobiota	c__Verrucomicrobiae	o__Methylacidiphilales	f__Methylacidiphilaceae	g__norank_f__Methylacidiphilaceae	s__uncultured_bacterium_g__norank_f__Methylacidiphilaceae	OTU3807	0	0	2	0	0	3	0	0	0	0	1	2	0	0	0	8
d__Bacteria	k__norank_d__Bacteria	p__Proteobacteria	c__Gammaproteobacteria	o__Diplorickettsiales	f__Diplorickettsiaceae	g__Aquicella	s__unclassified_g__Aquicella	OTU2230	0	0	0	0	0	0	2	0	1	0	0	0	0	0	0	3
d__Bacteria	k__norank_d__Bacteria	p__Verrucomicrobiota	c__Chlamydiae	o__Chlamydiales	f__unclassified_o__Chlamydiales	g__unclassified_o__Chlamydiales	s__unclassified_o__Chlamydiales	OTU1948	0	0	0	0	1	0	2	0	0	0	0	0	0	0	0	3
d__Bacteria	k__norank_d__Bacteria	p__Proteobacteria	c__Alphaproteobacteria	o__Rhizobiales	f__unclassified_o__Rhizobiales	g__unclassified_o__Rhizobiales	s__unclassified_o__Rhizobiales	OTU58	2	0	0	0	0	0	0	0	0	1	0	0	0	0	0	3
d__Bacteria	k__norank_d__Bacteria	p__Chloroflexi	c__Ktedonobacteria	o__Ktedonobacterales	f__Ktedonobacteraceae	g__unclassified_f__Ktedonobacteraceae	s__unclassified_f__Ktedonobacteraceae	OTU3986	5	2	3	0	0	0	2	0	1	0	0	5	0	1	0	19
d__Bacteria	k__norank_d__Bacteria	p__Gemmatimonadota	c__Gemmatimonadetes	o__Gemmatimonadales	f__Gemmatimonadaceae	g__norank_f__Gemmatimonadaceae	s__Gemmatimonas_sp._WX54	OTU3259	0	0	0	0	0	0	0	0	0	12	2	2	1	0	1	18
d__Bacteria	k__norank_d__Bacteria	p__Planctomycetota	c__Planctomycetes	o__Gemmatales	f__Gemmataceae	g__norank_f__Gemmataceae	s__uncultured_bacterium_g__norank_f__Gemmataceae	OTU437	0	0	2	0	1	2	0	0	1	0	0	2	0	0	1	9
d__Bacteria	k__norank_d__Bacteria	p__Proteobacteria	c__Alphaproteobacteria	o__Elsterales	f__norank_o__Elsterales	g__norank_f__norank_o__Elsterales	s__unclassified_g__norank_f__norank_o__Elsterales	OTU1599	10	14	4	33	38	28	107	24	45	1	4	9	40	6	3	366
d__Bacteria	k__norank_d__Bacteria	p__Proteobacteria	c__Alphaproteobacteria	o__Elsterales	f__norank_o__Elsterales	g__norank_f__norank_o__Elsterales	s__uncultured_bacterium_g__norank_f__norank_o__Elsterales	OTU1002	4	3	1	8	6	10	5	10	9	1	7	2	4	4	1	75
d__Bacteria	k__norank_d__Bacteria	p__Latescibacterota	c__norank_p__Latescibacterota	o__norank_c__norank_p__Latescibacterota	f__norank_o__norank_c__norank_p__Latescibacterota	g__norank_f__norank_o__norank_c__norank_p__Latescibacterota	s__uncultured_bacterium_g__norank_f__norank_o__norank_c__norank_p__Latescibacterota	OTU4556	0	0	0	0	0	0	0	0	0	2	0	0	0	4	0	6
d__Bacteria	k__norank_d__Bacteria	p__Chloroflexi	c__Ktedonobacteria	o__Ktedonobacterales	f__Ktedonobacteraceae	g__1921-3	s__uncultured_bacterium_g__1921-3	OTU4279	0	0	0	0	1	0	0	0	1	0	0	0	0	0	0	2
d__Bacteria	k__norank_d__Bacteria	p__Bdellovibrionota	c__Bdellovibrionia	o__Bdellovibrionales	f__Bdellovibrionaceae	g__OM27_clade	s__unclassified_g__OM27_clade	OTU106	2	1	0	0	0	0	0	0	0	0	0	0	0	0	0	3
d__Bacteria	k__norank_d__Bacteria	p__Chloroflexi	c__Ktedonobacteria	o__Ktedonobacterales	f__Ktedonobacteraceae	g__unclassified_f__Ktedonobacteraceae	s__unclassified_f__Ktedonobacteraceae	OTU4537	0	4	0	0	0	0	2	0	0	0	0	0	2	0	0	8
d__Bacteria	k__norank_d__Bacteria	p__Verrucomicrobiota	c__Verrucomicrobiae	o__Pedosphaerales	f__Pedosphaeraceae	g__ADurb.Bin063-1	s__uncultured_bacterium_g__ADurb.Bin063-1	OTU4790	2	4	2	0	2	2	0	0	3	0	2	9	1	2	1	30
d__Bacteria	k__norank_d__Bacteria	p__Verrucomicrobiota	c__Chlamydiae	o__Chlamydiales	f__Parachlamydiaceae	g__Neochlamydia	s__unclassified_g__Neochlamydia	OTU6042	0	1	0	0	0	0	0	0	0	0	0	0	0	0	0	1
d__Bacteria	k__norank_d__Bacteria	p__Chloroflexi	c__TK10	o__norank_c__TK10	f__norank_o__norank_c__TK10	g__norank_f__norank_o__norank_c__TK10	s__unclassified_g__norank_f__norank_o__norank_c__TK10	OTU2479	0	0	0	0	1	0	1	2	0	0	0	1	0	0	0	5
d__Bacteria	k__norank_d__Bacteria	p__Planctomycetota	c__Phycisphaerae	o__Phycisphaerales	f__Phycisphaeraceae	g__SM1A02	s__metagenome_g__SM1A02	OTU5316	2	0	2	0	0	0	0	0	0	0	0	5	0	3	2	14
d__Bacteria	k__norank_d__Bacteria	p__Myxococcota	c__Polyangia	o__Polyangiales	f__Sandaracinaceae	g__norank_f__Sandaracinaceae	s__metagenome_g__norank_f__Sandaracinaceae	OTU5450	0	0	0	0	0	0	0	0	0	2	0	0	0	0	1	3
d__Bacteria	k__norank_d__Bacteria	p__Proteobacteria	c__Alphaproteobacteria	o__Rhizobiales	f__Rhizobiales_Incertae_Sedis	g__norank_f__Rhizobiales_Incertae_Sedis	s__metagenome_g__norank_f__Rhizobiales_Incertae_Sedis	OTU964	0	1	2	3	2	0	0	0	0	2	0	0	0	0	0	10
d__Bacteria	k__norank_d__Bacteria	p__Myxococcota	c__Polyangia	o__Polyangiales	f__Sandaracinaceae	g__norank_f__Sandaracinaceae	s__metagenome_g__norank_f__Sandaracinaceae	OTU5457	0	0	0	0	0	0	0	0	0	18	13	0	0	0	2	33
d__Bacteria	k__norank_d__Bacteria	p__Actinobacteriota	c__Acidimicrobiia	o__norank_c__Acidimicrobiia	f__norank_o__norank_c__Acidimicrobiia	g__norank_f__norank_o__norank_c__Acidimicrobiia	s__uncultured_bacterium_g__norank_f__norank_o__norank_c__Acidimicrobiia	OTU3181	2	1	1	10	12	10	23	8	14	4	16	27	28	4	0	160
d__Bacteria	k__norank_d__Bacteria	p__Proteobacteria	c__Gammaproteobacteria	o__Burkholderiales	f__SC-I-84	g__norank_f__SC-I-84	s__unclassified_g__norank_f__SC-I-84	OTU3095	0	0	0	0	0	0	4	0	0	70	32	24	13	4	12	159
d__Bacteria	k__norank_d__Bacteria	p__Acidobacteriota	c__Vicinamibacteria	o__Vicinamibacterales	f__Vicinamibacteraceae	g__norank_f__Vicinamibacteraceae	s__uncultured_Acidobacteriales_bacterium_g__norank_f__Vicinamibacteraceae	OTU77	4	0	5	0	0	1	0	0	0	1	0	0	0	0	2	13
d__Bacteria	k__norank_d__Bacteria	p__Patescibacteria	c__Saccharimonadia	o__Saccharimonadales	f__LWQ8	g__norank_f__LWQ8	s__unclassified_g__norank_f__LWQ8	OTU1459	0	0	0	0	0	871	0	22	0	0	0	0	0	0	0	893
d__Bacteria	k__norank_d__Bacteria	p__GAL15	c__norank_p__GAL15	o__norank_c__norank_p__GAL15	f__norank_o__norank_c__norank_p__GAL15	g__norank_f__norank_o__norank_c__norank_p__GAL15	s__uncultured_Firmicutes_bacterium_g__norank_f__norank_o__norank_c__norank_p__GAL15	OTU1682	9	2	0	21	1	19	9	8	18	0	0	0	0	0	3	90
d__Bacteria	k__norank_d__Bacteria	p__Acidobacteriota	c__Vicinamibacteria	o__Vicinamibacterales	f__norank_o__Vicinamibacterales	g__norank_f__norank_o__Vicinamibacterales	s__uncultured_Acidobacteria_bacterium_g__norank_f__norank_o__Vicinamibacterales	OTU5647	2	0	2	0	0	0	0	0	0	1	0	0	0	0	2	7
d__Bacteria	k__norank_d__Bacteria	p__Proteobacteria	c__Alphaproteobacteria	o__Sphingomonadales	f__Sphingomonadaceae	g__Novosphingobium	s__unclassified_g__Novosphingobium	OTU154	24	15	12	7	12	7	9	4	26	1	1	1	13	2	23	157
d__Bacteria	k__norank_d__Bacteria	p__Verrucomicrobiota	c__Chlamydiae	o__Chlamydiales	f__cvE6	g__norank_f__cvE6	s__uncultured_bacterium_g__norank_f__cvE6	OTU2358	0	0	0	0	1	0	1	1	0	0	0	0	0	0	0	3
d__Bacteria	k__norank_d__Bacteria	p__Firmicutes	c__Bacilli	o__Paenibacillales	f__Paenibacillaceae	g__Paenibacillus	s__Paenibacillus_alginolyticus	OTU1928	9	8	0	3	2	2	3	6	0	1	0	0	1	1	2	38
d__Bacteria	k__norank_d__Bacteria	p__Dependentiae	c__Babeliae	o__Babeliales	f__norank_o__Babeliales	g__norank_f__norank_o__Babeliales	s__uncultured_bacterium_g__norank_f__norank_o__Babeliales	OTU2603	0	0	0	0	0	0	0	1	0	0	1	0	0	0	0	2
d__Bacteria	k__norank_d__Bacteria	p__Acidobacteriota	c__Subgroup_5	o__norank_c__Subgroup_5	f__norank_o__norank_c__Subgroup_5	g__norank_f__norank_o__norank_c__Subgroup_5	s__metagenome_g__norank_f__norank_o__norank_c__Subgroup_5	OTU4436	4	0	1	0	2	0	0	0	1	1	0	0	0	1	1	11
d__Bacteria	k__norank_d__Bacteria	p__Chloroflexi	c__Chloroflexia	o__Thermomicrobiales	f__JG30-KF-CM45	g__norank_f__JG30-KF-CM45	s__uncultured_bacterium_g__norank_f__JG30-KF-CM45	OTU2910	0	0	0	0	0	0	0	0	0	26	0	0	0	0	8	34
d__Bacteria	k__norank_d__Bacteria	p__Proteobacteria	c__Gammaproteobacteria	o__Burkholderiales	f__unclassified_o__Burkholderiales	g__unclassified_o__Burkholderiales	s__unclassified_o__Burkholderiales	OTU635	0	0	4	0	0	0	0	0	0	1	0	0	0	0	0	5
d__Bacteria	k__norank_d__Bacteria	p__MBNT15	c__norank_p__MBNT15	o__norank_c__norank_p__MBNT15	f__norank_o__norank_c__norank_p__MBNT15	g__norank_f__norank_o__norank_c__norank_p__MBNT15	s__uncultured_bacterium_g__norank_f__norank_o__norank_c__norank_p__MBNT15	OTU4602	1	1	0	0	3	4	0	0	0	11	2	0	0	9	4	35
d__Bacteria	k__norank_d__Bacteria	p__Proteobacteria	c__Gammaproteobacteria	o__BD72BR169	f__norank_o__BD72BR169	g__norank_f__norank_o__BD72BR169	s__uncultured_bacterium_g__norank_f__norank_o__BD72BR169	OTU2019	2	0	0	0	0	1	3	0	0	0	0	0	2	0	0	8
d__Bacteria	k__norank_d__Bacteria	p__Firmicutes	c__Bacilli	o__Bacillales	f__Bacillaceae	g__Virgibacillus	s__unclassified_g__Virgibacillus	OTU6165	5	0	2	0	0	0	0	0	0	13	5	3	4	1	5	38
d__Bacteria	k__norank_d__Bacteria	p__Bacteroidota	c__Bacteroidia	o__Chitinophagales	f__Chitinophagaceae	g__Edaphobaculum	s__uncultured_bacterium_g__Edaphobaculum	OTU2551	0	0	3	0	0	0	0	17	0	0	3	0	0	0	0	23
d__Bacteria	k__norank_d__Bacteria	p__Myxococcota	c__Polyangia	o__Nannocystales	f__Nannocystaceae	g__Nannocystis	s__unclassified_g__Nannocystis	OTU3081	6	0	2	0	0	0	0	0	0	11	0	0	0	0	9	28
d__Bacteria	k__norank_d__Bacteria	p__Firmicutes	c__Bacilli	o__Paenibacillales	f__Paenibacillaceae	g__Paenibacillus	s__Paenibacillus_puldeungensis	OTU6222	0	0	0	1	0	0	0	0	0	1	0	2	0	0	6	10
d__Bacteria	k__norank_d__Bacteria	p__Firmicutes	c__Clostridia	o__Peptostreptococcales-Tissierellales	f__norank_o__Peptostreptococcales-Tissierellales	g__Ezakiella	s__uncultured_bacterium_g__Ezakiella	OTU5838	0	0	2	0	0	0	2	0	0	0	3	0	1	0	0	8
d__Bacteria	k__norank_d__Bacteria	p__unclassified_k__norank_d__Bacteria	c__unclassified_k__norank_d__Bacteria	o__unclassified_k__norank_d__Bacteria	f__unclassified_k__norank_d__Bacteria	g__unclassified_k__norank_d__Bacteria	s__unclassified_k__norank_d__Bacteria	OTU1475	1	0	0	0	0	1	8	1	0	0	1	0	0	0	0	12
d__Bacteria	k__norank_d__Bacteria	p__Abditibacteriota	c__Abditibacteria	o__Abditibacteriales	f__Abditibacteriaceae	g__Abditibacterium	s__unclassified_g__Abditibacterium	OTU6530	0	0	1	0	0	0	0	1	0	0	0	0	0	0	0	2
d__Bacteria	k__norank_d__Bacteria	p__unclassified_k__norank_d__Bacteria	c__unclassified_k__norank_d__Bacteria	o__unclassified_k__norank_d__Bacteria	f__unclassified_k__norank_d__Bacteria	g__unclassified_k__norank_d__Bacteria	s__unclassified_k__norank_d__Bacteria	OTU4324	0	0	0	0	0	0	0	0	0	0	1	0	0	0	0	1
d__Bacteria	k__norank_d__Bacteria	p__unclassified_k__norank_d__Bacteria	c__unclassified_k__norank_d__Bacteria	o__unclassified_k__norank_d__Bacteria	f__unclassified_k__norank_d__Bacteria	g__unclassified_k__norank_d__Bacteria	s__unclassified_k__norank_d__Bacteria	OTU1471	0	0	0	0	0	3	0	0	0	0	0	0	0	0	0	3
d__Bacteria	k__norank_d__Bacteria	p__Patescibacteria	c__Saccharimonadia	o__Saccharimonadales	f__norank_o__Saccharimonadales	g__norank_f__norank_o__Saccharimonadales	s__wastewater_metagenome_g__norank_f__norank_o__Saccharimonadales	OTU570	2	0	5	0	2	0	0	0	0	0	0	0	0	0	0	9
d__Bacteria	k__norank_d__Bacteria	p__Myxococcota	c__Myxococcia	o__Myxococcales	f__Myxococcaceae	g__P3OB-42	s__uncultured_bacterium_g__P3OB-42	OTU4194	0	3	0	0	0	0	0	0	0	0	0	0	0	3	0	6
d__Bacteria	k__norank_d__Bacteria	p__Bacteroidota	c__Bacteroidia	o__Chitinophagales	f__Chitinophagaceae	g__Flavisolibacter	s__unclassified_g__Flavisolibacter	OTU5955	0	0	1	0	0	0	0	0	0	0	0	0	0	0	0	1
d__Bacteria	k__norank_d__Bacteria	p__Proteobacteria	c__Alphaproteobacteria	o__Rhizobiales	f__Xanthobacteraceae	g__norank_f__Xanthobacteraceae	s__Rhizobiales_bacterium_GAS113	OTU1964	12	11	15	17	25	26	27	26	11	3	5	9	8	4	2	201
d__Bacteria	k__norank_d__Bacteria	p__Chloroflexi	c__Chloroflexia	o__Thermomicrobiales	f__Thermomicrobiaceae	g__Nitrolancea	s__Nitrolancea_hollandica_Lb	OTU5417	0	0	0	0	0	0	0	0	0	0	0	1	0	0	2	3
d__Bacteria	k__norank_d__Bacteria	p__Chloroflexi	c__Anaerolineae	o__SBR1031	f__A4b	g__norank_f__A4b	s__uncultured_bacterium_g__norank_f__A4b	OTU3374	0	0	0	0	0	0	0	0	0	0	1	0	0	0	0	1
d__Bacteria	k__norank_d__Bacteria	p__Verrucomicrobiota	c__Verrucomicrobiae	o__Pedosphaerales	f__Pedosphaeraceae	g__norank_f__Pedosphaeraceae	s__unclassified_g__norank_f__Pedosphaeraceae	OTU3820	0	0	2	0	0	0	0	0	1	0	6	3	0	1	1	14
d__Bacteria	k__norank_d__Bacteria	p__Bdellovibrionota	c__Oligoflexia	o__0319-6G20	f__norank_o__0319-6G20	g__norank_f__norank_o__0319-6G20	s__unclassified_g__norank_f__norank_o__0319-6G20	OTU6071	0	3	0	0	18	1	2	3	5	0	0	0	2	1	0	35
d__Bacteria	k__norank_d__Bacteria	p__Proteobacteria	c__Alphaproteobacteria	o__norank_c__Alphaproteobacteria	f__norank_o__norank_c__Alphaproteobacteria	g__norank_f__norank_o__norank_c__Alphaproteobacteria	s__uncultured_Acetobacteraceae_bacterium_g__norank_f__norank	OTU152	9	2	1	1	0	0	0	0	3	25	3	5	0	10	4	63
d__Bacteria	k__norank_d__Bacteria	p__Chloroflexi	c__Ktedonobacteria	o__Ktedonobacterales	f__Ktedonobacteraceae	g__FCPS473	s__uncultured_Thermosporothrix_sp._g__FCPS473	OTU451	0	0	5	0	0	0	0	0	0	0	0	0	0	0	0	5
d__Bacteria	k__norank_d__Bacteria	p__Cyanobacteria	c__Cyanobacteriia	o__Cyanobacteriales	f__Chroococcidiopsaceae	g__norank_f__Chroococcidiopsaceae	s__uncultured_bacterium_g__norank_f__Chroococcidiopsaceae	OTU5179	0	0	2	0	0	0	0	0	0	0	1	0	0	0	0	3
d__Bacteria	k__norank_d__Bacteria	p__Patescibacteria	c__Saccharimonadia	o__Saccharimonadales	f__LWQ8	g__norank_f__LWQ8	s__uncultured_bacterium_g__norank_f__LWQ8	OTU1056	40	146	17	14	459	92	213	118	9	0	0	3	179	0	8	1298
d__Bacteria	k__norank_d__Bacteria	p__Planctomycetota	c__Planctomycetes	o__Gemmatales	f__Gemmataceae	g__norank_f__Gemmataceae	s__unclassified_g__norank_f__Gemmataceae	OTU2116	0	0	0	0	2	0	11	2	0	0	0	0	2	2	0	19
d__Bacteria	k__norank_d__Bacteria	p__Bacteroidota	c__Bacteroidia	o__Sphingobacteriales	f__AKYH767	g__norank_f__AKYH767	s__metagenome_g__norank_f__AKYH767	OTU4066	0	0	3	0	0	0	0	0	0	0	0	0	0	1	0	4
d__Bacteria	k__norank_d__Bacteria	p__Verrucomicrobiota	c__Verrucomicrobiae	o__Chthoniobacterales	f__Chthoniobacteraceae	g__unclassified_f__Chthoniobacteraceae	s__unclassified_f__Chthoniobacteraceae	OTU595	0	0	3	0	0	0	0	0	0	0	0	0	0	0	0	3
d__Bacteria	k__norank_d__Bacteria	p__Firmicutes	c__Bacilli	o__Bacillales	f__Bacillaceae	g__unclassified_f__Bacillaceae	s__unclassified_f__Bacillaceae	OTU6306	0	3	0	1	0	1	1	0	3	11	7	26	16	11	7	87
d__Bacteria	k__norank_d__Bacteria	p__Proteobacteria	c__Alphaproteobacteria	o__Elsterales	f__norank_o__Elsterales	g__norank_f__norank_o__Elsterales	s__unclassified_g__norank_f__norank_o__Elsterales	OTU2248	7	38	2	30	13	56	34	64	55	5	15	5	109	6	1	440
d__Bacteria	k__norank_d__Bacteria	p__Proteobacteria	c__Gammaproteobacteria	o__Cardiobacteriales	f__Cardiobacteriaceae	g__Cardiobacterium	s__uncultured_bacterium_g__Cardiobacterium	OTU3447	0	0	0	0	0	0	0	0	0	0	3	0	0	0	0	3
d__Bacteria	k__norank_d__Bacteria	p__Bacteroidota	c__Kryptonia	o__Kryptoniales	f__BSV26	g__norank_f__BSV26	s__uncultured_bacterium_g__norank_f__BSV26	OTU1516	0	0	0	0	1	2	0	0	0	0	0	0	0	0	0	3
d__Bacteria	k__norank_d__Bacteria	p__Proteobacteria	c__Gammaproteobacteria	o__Diplorickettsiales	f__Diplorickettsiaceae	g__norank_f__Diplorickettsiaceae	s__uncultured_bacterium_g__norank_f__Diplorickettsiaceae	OTU653	7	0	12	0	0	0	0	0	0	0	0	0	0	0	0	19
d__Bacteria	k__norank_d__Bacteria	p__Chloroflexi	c__Ktedonobacteria	o__Ktedonobacterales	f__JG30-KF-AS9	g__norank_f__JG30-KF-AS9	s__unclassified_g__norank_f__JG30-KF-AS9	OTU2115	0	1	1	2	1	1	3	0	2	0	0	0	2	0	0	13
d__Bacteria	k__norank_d__Bacteria	p__Bacteroidota	c__Bacteroidia	o__Chitinophagales	f__Chitinophagaceae	g__Puia	s__uncultured_bacterium_g__Puia	OTU2984	30	37	57	14	15	28	11	6	150	11	62	56	6	20	49	552
d__Bacteria	k__norank_d__Bacteria	p__Firmicutes	c__Limnochordia	o__Limnochordales	f__Limnochordaceae	g__norank_f__Limnochordaceae	s__uncultured_Firmicutes_bacterium_g__norank_f__Limnochordaceae	OTU6343	0	0	0	0	0	0	0	0	0	0	0	4	0	0	0	4
d__Bacteria	k__norank_d__Bacteria	p__Elusimicrobiota	c__Lineage_IIa	o__norank_c__Lineage_IIa	f__norank_o__norank_c__Lineage_IIa	g__norank_f__norank_o__norank_c__Lineage_IIa	s__uncultured_actinobacterium_g__norank_f__norank	OTU2799	0	3	0	7	0	0	1	1	9	0	0	0	0	0	0	21
d__Bacteria	k__norank_d__Bacteria	p__Proteobacteria	c__Gammaproteobacteria	o__Legionellales	f__Legionellaceae	g__Legionella	s__unclassified_g__Legionella	OTU317	0	3	0	0	0	0	0	0	0	1	0	0	0	0	2	6
d__Bacteria	k__norank_d__Bacteria	p__Bacteroidota	c__Bacteroidia	o__Cytophagales	f__Spirosomaceae	g__Spirosoma	s__unclassified_g__Spirosoma	OTU702	0	0	1	1	0	0	0	0	0	0	0	0	0	0	0	2
d__Bacteria	k__norank_d__Bacteria	p__Bdellovibrionota	c__Oligoflexia	o__0319-6G20	f__norank_o__0319-6G20	g__norank_f__norank_o__0319-6G20	s__unclassified_g__norank_f__norank_o__0319-6G20	OTU5857	0	0	0	0	0	0	0	3	0	0	0	0	0	0	0	3
d__Bacteria	k__norank_d__Bacteria	p__Proteobacteria	c__Alphaproteobacteria	o__Rickettsiales	f__norank_o__Rickettsiales	g__Candidatus_Jidaibacter	s__unclassified_g__Candidatus_Jidaibacter	OTU5034	0	0	0	0	0	1	1	0	0	0	0	0	1	0	0	3
d__Bacteria	k__norank_d__Bacteria	p__Bacteroidota	c__Bacteroidia	o__Chitinophagales	f__Saprospiraceae	g__norank_f__Saprospiraceae	s__uncultured_Devosia_sp._g__norank_f__Saprospiraceae	OTU2724	23	10	8	10	16	4	29	19	36	0	0	0	18	15	7	195
d__Bacteria	k__norank_d__Bacteria	p__Actinobacteriota	c__Actinobacteria	o__Streptosporangiales	f__Thermomonosporaceae	g__unclassified_f__Thermomonosporaceae	s__unclassified_f__Thermomonosporaceae	OTU1107	6	7	4	38	2	8	11	19	36	2	17	5	19	0	0	174
d__Bacteria	k__norank_d__Bacteria	p__Firmicutes	c__Negativicutes	o__Veillonellales-Selenomonadales	f__Veillonellaceae	g__Dialister	s__unclassified_g__Dialister	OTU5121	0	0	2	0	2	0	0	0	0	0	0	0	0	0	0	4
d__Bacteria	k__norank_d__Bacteria	p__Chloroflexi	c__Chloroflexia	o__Chloroflexales	f__Roseiflexaceae	g__norank_f__Roseiflexaceae	s__uncultured_bacterium_g__norank_f__Roseiflexaceae	OTU5755	5	0	1	0	17	0	0	0	0	16	0	0	0	2	3	44
d__Bacteria	k__norank_d__Bacteria	p__Cyanobacteria	c__Vampirivibrionia	o__Obscuribacterales	f__Obscuribacteraceae	g__norank_f__Obscuribacteraceae	s__uncultured_bacterium_g__norank_f__Obscuribacteraceae	OTU2719	0	0	0	0	2	0	2	5	5	0	0	4	14	0	1	33
d__Bacteria	k__norank_d__Bacteria	p__Myxococcota	c__Myxococcia	o__Myxococcales	f__Anaeromyxobacteraceae	g__Anaeromyxobacter	s__unclassified_g__Anaeromyxobacter	OTU572	0	1	1	0	0	0	0	0	0	0	0	1	0	2	0	5
d__Bacteria	k__norank_d__Bacteria	p__Proteobacteria	c__Gammaproteobacteria	o__unclassified_c__Gammaproteobacteria	f__unclassified_c__Gammaproteobacteria	g__unclassified_c__Gammaproteobacteria	s__unclassified_c__Gammaproteobacteria	OTU1184	0	0	0	1	2	2	1	1	0	0	0	0	0	0	0	7
d__Bacteria	k__norank_d__Bacteria	p__Verrucomicrobiota	c__Chlamydiae	o__Chlamydiales	f__Parachlamydiaceae	g__unclassified_f__Parachlamydiaceae	s__unclassified_f__Parachlamydiaceae	OTU5078	0	0	0	0	0	0	0	0	0	0	0	0	2	0	0	2
d__Bacteria	k__norank_d__Bacteria	p__Armatimonadota	c__Chthonomonadetes	o__Chthonomonadales	f__Chthonomonadaceae	g__Chthonomonas	s__uncultured_bacterium_g__Chthonomonas	OTU340	0	1	2	0	0	0	0	0	1	0	3	0	0	0	0	7
d__Bacteria	k__norank_d__Bacteria	p__Proteobacteria	c__Gammaproteobacteria	o__Xanthomonadales	f__Rhodanobacteraceae	g__unclassified_f__Rhodanobacteraceae	s__unclassified_f__Rhodanobacteraceae	OTU3241	0	0	0	0	0	0	0	0	0	3	0	0	0	0	0	3
d__Bacteria	k__norank_d__Bacteria	p__Firmicutes	c__Bacilli	o__Paenibacillales	f__Paenibacillaceae	g__Paenibacillus	s__unclassified_g__Paenibacillus	OTU3566	0	0	0	0	0	0	0	0	0	0	0	3	0	0	1	4
d__Bacteria	k__norank_d__Bacteria	p__Actinobacteriota	c__Actinobacteria	o__Corynebacteriales	f__Dietziaceae	g__Dietzia	s__Dietzia_timorensis	OTU1722	3	1	10	0	5	1	1	4	0	1	11	0	8	0	0	45
d__Bacteria	k__norank_d__Bacteria	p__Bdellovibrionota	c__Oligoflexia	o__Silvanigrellales	f__Silvanigrellaceae	g__Silvanigrella	s__uncultured_bacterium_g__Silvanigrella	OTU3225	0	0	0	0	0	0	0	0	0	1	0	0	0	0	0	1
d__Bacteria	k__norank_d__Bacteria	p__Acidobacteriota	c__Vicinamibacteria	o__Vicinamibacterales	f__Vicinamibacteraceae	g__norank_f__Vicinamibacteraceae	s__uncultured_Acidobacteria_bacterium_g__norank_f__Vicinamibacteraceae	OTU5980	0	8	6	1	1	0	0	0	0	2	8	0	1	0	12	39
d__Bacteria	k__norank_d__Bacteria	p__Cyanobacteria	c__Cyanobacteriia	o__Chloroplast	f__norank_o__Chloroplast	g__norank_f__norank_o__Chloroplast	s__Lolium_perenne	OTU841	32	0	5	0	0	0	0	0	0	0	0	12	0	0	0	49
d__Bacteria	k__norank_d__Bacteria	p__Cyanobacteria	c__Cyanobacteriia	o__Cyanobacteriales	f__Coleofasciculaceae	g__norank_f__Coleofasciculaceae	s__unclassified_g__norank_f__Coleofasciculaceae	OTU6243	0	0	1	0	0	0	0	0	0	0	0	0	0	0	0	1
d__Bacteria	k__norank_d__Bacteria	p__Proteobacteria	c__Gammaproteobacteria	o__unclassified_c__Gammaproteobacteria	f__unclassified_c__Gammaproteobacteria	g__unclassified_c__Gammaproteobacteria	s__unclassified_c__Gammaproteobacteria	OTU2237	0	0	0	2	1	0	0	0	0	0	0	0	0	0	0	3
d__Bacteria	k__norank_d__Bacteria	p__Proteobacteria	c__Gammaproteobacteria	o__unclassified_c__Gammaproteobacteria	f__unclassified_c__Gammaproteobacteria	g__unclassified_c__Gammaproteobacteria	s__unclassified_c__Gammaproteobacteria	OTU2986	0	0	0	0	0	0	0	0	0	3	0	0	0	0	0	3
d__Bacteria	k__norank_d__Bacteria	p__Proteobacteria	c__Gammaproteobacteria	o__Gammaproteobacteria_Incertae_Sedis	f__unclassified_o__Gammaproteobacteria_Incertae_Sedis	g__Acidibacter	s__uncultured_bacterium_g__Acidibacter	OTU5367	24	39	21	20	72	159	29	105	38	11	16	78	9	44	32	697
d__Bacteria	k__norank_d__Bacteria	p__Cyanobacteria	c__Vampirivibrionia	o__Vampirovibrionales	f__norank_o__Vampirovibrionales	g__norank_f__norank_o__Vampirovibrionales	s__uncultured_bacterium_g__norank_f__norank_o__Vampirovibrionales	OTU1324	0	0	1	0	2	0	0	0	0	0	0	0	0	0	0	3
d__Bacteria	k__norank_d__Bacteria	p__Proteobacteria	c__Gammaproteobacteria	o__Diplorickettsiales	f__Diplorickettsiaceae	g__Aquicella	s__unclassified_g__Aquicella	OTU1283	0	0	0	0	18	0	0	0	0	0	0	0	0	0	0	18
d__Bacteria	k__norank_d__Bacteria	p__Proteobacteria	c__Gammaproteobacteria	o__Oceanospirillales	f__Pseudohongiellaceae	g__BIyi10	s__uncultured_bacterium_g__BIyi10	OTU63	2	0	0	0	0	0	0	0	0	0	0	0	0	0	0	2
d__Bacteria	k__norank_d__Bacteria	p__Proteobacteria	c__Gammaproteobacteria	o__Diplorickettsiales	f__Diplorickettsiaceae	g__Aquicella	s__unclassified_g__Aquicella	OTU2532	0	0	1	0	0	2	0	1	0	0	0	0	0	0	0	4
d__Bacteria	k__norank_d__Bacteria	p__Myxococcota	c__Polyangia	o__mle1-27	f__norank_o__mle1-27	g__norank_f__norank_o__mle1-27	s__uncultured_delta_proteobacterium_g__norank_f__norank_o__mle1-27	OTU62	1	0	0	0	0	1	0	0	0	0	0	1	0	2	0	5
d__Bacteria	k__norank_d__Bacteria	p__Bacteroidota	c__Bacteroidia	o__Chitinophagales	f__Chitinophagaceae	g__Puia	s__uncultured_bacterium_g__Puia	OTU4912	9	29	1	0	5	4	2	5	0	3	9	35	6	1	8	117
d__Bacteria	k__norank_d__Bacteria	p__Acidobacteriota	c__Acidobacteriae	o__Acidobacteriales	f__unclassified_o__Acidobacteriales	g__unclassified_o__Acidobacteriales	s__unclassified_o__Acidobacteriales	OTU4888	2	5	3	0	8	1	0	1	2	1	0	8	3	3	3	40
d__Bacteria	k__norank_d__Bacteria	p__Bdellovibrionota	c__Oligoflexia	o__0319-6G20	f__norank_o__0319-6G20	g__norank_f__norank_o__0319-6G20	s__bacterium_enrichment_culture_clone_B1262011	OTU3455	0	0	0	0	0	0	0	0	0	0	2	0	0	0	0	2
d__Bacteria	k__norank_d__Bacteria	p__Actinobacteriota	c__Thermoleophilia	o__Gaiellales	f__norank_o__Gaiellales	g__norank_f__norank_o__Gaiellales	s__unclassified_g__norank_f__norank_o__Gaiellales	OTU4588	5	4	0	0	1	2	1	0	0	0	0	0	0	7	0	20
d__Bacteria	k__norank_d__Bacteria	p__Acidobacteriota	c__Acidobacteriae	o__Bryobacterales	f__Bryobacteraceae	g__Bryobacter	s__unclassified_g__Bryobacter	OTU4935	3	9	8	5	18	20	5	12	14	1	5	6	7	4	9	126
d__Bacteria	k__norank_d__Bacteria	p__Proteobacteria	c__Gammaproteobacteria	o__Diplorickettsiales	f__Diplorickettsiaceae	g__Aquicella	s__unclassified_g__Aquicella	OTU3913	0	0	0	0	0	0	0	0	0	20	0	0	0	6	12	38
d__Bacteria	k__norank_d__Bacteria	p__Chloroflexi	c__Anaerolineae	o__SBR1031	f__norank_o__SBR1031	g__norank_f__norank_o__SBR1031	s__uncultured_bacterium_g__norank_f__norank_o__SBR1031	OTU3211	7	0	0	0	0	0	0	0	0	1	0	0	0	0	0	8
d__Bacteria	k__norank_d__Bacteria	p__Proteobacteria	c__Alphaproteobacteria	o__Sphingomonadales	f__Sphingomonadaceae	g__Sphingoaurantiacus	s__uncultured_bacterium_g__Sphingoaurantiacus	OTU1700	0	1	2	0	0	0	0	2	0	0	0	0	0	0	0	5
d__Bacteria	k__norank_d__Bacteria	p__Verrucomicrobiota	c__Verrucomicrobiae	o__Pedosphaerales	f__Pedosphaeraceae	g__unclassified_f__Pedosphaeraceae	s__unclassified_f__Pedosphaeraceae	OTU1039	0	0	0	2	0	0	0	0	1	0	0	0	0	0	0	3
d__Bacteria	k__norank_d__Bacteria	p__Bacteroidota	c__Bacteroidia	o__unclassified_c__Bacteroidia	f__unclassified_c__Bacteroidia	g__unclassified_c__Bacteroidia	s__unclassified_c__Bacteroidia	OTU158	2	0	0	0	1	0	0	0	0	0	0	0	0	0	0	3
d__Bacteria	k__norank_d__Bacteria	p__Chloroflexi	c__Ktedonobacteria	o__B12-WMSP1	f__norank_o__B12-WMSP1	g__norank_f__norank_o__B12-WMSP1	s__uncultured_Chloroflexi_bacterium_g__norank_f__norank_o__B12-WMSP1	OTU5068	1	3	0	12	31	6	12	15	6	0	0	0	3	1	0	90
d__Bacteria	k__norank_d__Bacteria	p__Actinobacteriota	c__Actinobacteria	o__Micromonosporales	f__Micromonosporaceae	g__Actinocatenispora	s__Actinocatenispora_thailandica	OTU1528	82	17	10	23	15	25	0	0	0	3	0	0	1	0	0	176
d__Bacteria	k__norank_d__Bacteria	p__Planctomycetota	c__Phycisphaerae	o__Phycisphaerales	f__Phycisphaeraceae	g__SM1A02	s__metagenome_g__SM1A02	OTU457	0	0	2	0	0	0	0	0	0	7	9	1	0	0	1	20
d__Bacteria	k__norank_d__Bacteria	p__Gemmatimonadota	c__Gemmatimonadetes	o__Gemmatimonadales	f__Gemmatimonadaceae	g__unclassified_f__Gemmatimonadaceae	s__unclassified_f__Gemmatimonadaceae	OTU2846	0	0	0	0	0	0	0	0	0	2	0	0	0	0	0	2
d__Bacteria	k__norank_d__Bacteria	p__Fusobacteriota	c__Fusobacteriia	o__Fusobacteriales	f__Leptotrichiaceae	g__Leptotrichia	s__uncultured_bacterium_g__Leptotrichia	OTU3399	0	0	0	0	0	0	0	0	0	0	7	0	0	0	0	7
d__Bacteria	k__norank_d__Bacteria	p__Proteobacteria	c__Gammaproteobacteria	o__Gammaproteobacteria_Incertae_Sedis	f__unclassified_o__Gammaproteobacteria_Incertae_Sedis	g__Acidibacter	s__uncultured_bacterium_g__Acidibacter	OTU2163	1	0	7	0	4	2	4	1	8	4	3	1	0	1	35	71
d__Bacteria	k__norank_d__Bacteria	p__Chloroflexi	c__unclassified_p__Chloroflexi	o__unclassified_p__Chloroflexi	f__unclassified_p__Chloroflexi	g__unclassified_p__Chloroflexi	s__unclassified_p__Chloroflexi	OTU1457	0	0	1	1	0	2	0	0	0	0	0	1	4	0	0	9
d__Bacteria	k__norank_d__Bacteria	p__Gemmatimonadota	c__Gemmatimonadetes	o__Gemmatimonadales	f__Gemmatimonadaceae	g__norank_f__Gemmatimonadaceae	s__unclassified_g__norank_f__Gemmatimonadaceae	OTU2813	1	0	0	0	0	0	0	0	1	1	0	0	0	0	0	3
d__Bacteria	k__norank_d__Bacteria	p__Myxococcota	c__Polyangia	o__Haliangiales	f__Haliangiaceae	g__Haliangium	s__unclassified_g__Haliangium	OTU4694	0	0	1	0	0	0	1	0	0	0	0	1	0	2	3	8
d__Bacteria	k__norank_d__Bacteria	p__Actinobacteriota	c__Acidimicrobiia	o__IMCC26256	f__norank_o__IMCC26256	g__norank_f__norank_o__IMCC26256	s__uncultured_Ferrimicrobium_sp._g__norank	OTU1131	24	48	20	30	48	34	11	33	45	1	8	7	10	25	5	349
d__Bacteria	k__norank_d__Bacteria	p__Myxococcota	c__Polyangia	o__Polyangiales	f__BIrii41	g__norank_f__BIrii41	s__unclassified_g__norank_f__BIrii41	OTU2869	3	3	35	0	0	0	0	0	0	58	125	0	0	1	14	239
d__Bacteria	k__norank_d__Bacteria	p__Chloroflexi	c__Ktedonobacteria	o__B12-WMSP1	f__norank_o__B12-WMSP1	g__norank_f__norank_o__B12-WMSP1	s__uncultured_Chloroflexi_bacterium_g__norank_f__norank_o__B12-WMSP1	OTU2518	0	0	0	0	0	0	0	5	0	0	0	0	0	0	0	5
d__Bacteria	k__norank_d__Bacteria	p__Firmicutes	c__Bacilli	o__Bacillales	f__Bacillaceae	g__norank_f__Bacillaceae	s__uncultured_bacterium_g__norank_f__Bacillaceae	OTU3657	0	0	0	0	0	0	0	0	0	1	0	1	0	0	0	2
d__Bacteria	k__norank_d__Bacteria	p__Planctomycetota	c__Phycisphaerae	o__Tepidisphaerales	f__WD2101_soil_group	g__norank_f__WD2101_soil_group	s__unclassified_g__norank_f__WD2101_soil_group	OTU2631	0	0	0	0	0	0	0	0	2	0	0	0	0	0	0	2
d__Bacteria	k__norank_d__Bacteria	p__Actinobacteriota	c__Acidimicrobiia	o__IMCC26256	f__norank_o__IMCC26256	g__norank_f__norank_o__IMCC26256	s__unclassified_g__norank_f__norank_o__IMCC26256	OTU2902	0	0	0	0	0	0	0	0	0	2	0	0	0	1	0	3
d__Bacteria	k__norank_d__Bacteria	p__Proteobacteria	c__Gammaproteobacteria	o__Salinisphaerales	f__Solimonadaceae	g__Nevskia	s__uncultured_bacterium_g__Nevskia	OTU1393	10	17	4	8	46	24	52	2	6	1	0	5	0	5	2	182
d__Bacteria	k__norank_d__Bacteria	p__Cyanobacteria	c__Cyanobacteriia	o__Chloroplast	f__norank_o__Chloroplast	g__norank_f__norank_o__Chloroplast	s__Monodopsis_sp._MarTras21_g__norank_f__norank	OTU1553	0	3	2	12	2	8	10	8	2	0	0	0	2	0	1	50
d__Bacteria	k__norank_d__Bacteria	p__Proteobacteria	c__Gammaproteobacteria	o__Diplorickettsiales	f__Diplorickettsiaceae	g__norank_f__Diplorickettsiaceae	s__unclassified_g__norank_f__Diplorickettsiaceae	OTU4862	0	0	0	0	0	0	0	0	0	0	0	0	6	0	0	6
d__Bacteria	k__norank_d__Bacteria	p__Firmicutes	c__Clostridia	o__Clostridiales	f__Clostridiaceae	g__Clostridium_sensu_stricto_12	s__Clostridium_magnum_DSM_2767	OTU740	0	2	71	0	0	2	0	0	0	1	0	0	1	2	1	80
d__Bacteria	k__norank_d__Bacteria	p__Proteobacteria	c__Gammaproteobacteria	o__Gammaproteobacteria_Incertae_Sedis	f__unclassified_o__Gammaproteobacteria_Incertae_Sedis	g__Candidatus_Ovatusbacter	s__uncultured_bacterium_g__Candidatus_Ovatusbacter	OTU523	0	0	5	0	0	0	0	0	1	0	0	0	0	0	0	6
d__Bacteria	k__norank_d__Bacteria	p__Proteobacteria	c__Gammaproteobacteria	o__Diplorickettsiales	f__Diplorickettsiaceae	g__norank_f__Diplorickettsiaceae	s__unclassified_g__norank_f__Diplorickettsiaceae	OTU4865	0	0	0	0	0	0	0	0	0	0	0	0	4	0	0	4
d__Bacteria	k__norank_d__Bacteria	p__Proteobacteria	c__Alphaproteobacteria	o__Paracaedibacterales	f__Paracaedibacteraceae	g__Candidatus_Captivus	s__Candidatus_Captivus_acidiprotistae	OTU2463	0	0	0	0	0	0	0	1	1	0	0	0	0	0	0	2
d__Bacteria	k__norank_d__Bacteria	p__Planctomycetota	c__Planctomycetes	o__Gemmatales	f__Gemmataceae	g__norank_f__Gemmataceae	s__unclassified_g__norank_f__Gemmataceae	OTU2441	0	0	1	0	0	0	0	1	0	0	0	0	1	0	0	3
d__Bacteria	k__norank_d__Bacteria	p__Chloroflexi	c__AD3	o__norank_c__AD3	f__norank_o__norank_c__AD3	g__norank_f__norank_o__norank_c__AD3	s__uncultured_soil_bacterium_g__norank_f__norank_o__norank_c__AD3	OTU4889	0	0	3	5	4	1	3	3	2	3	0	8	6	0	0	38
d__Bacteria	k__norank_d__Bacteria	p__Bacteroidota	c__unclassified_p__Bacteroidota	o__unclassified_p__Bacteroidota	f__unclassified_p__Bacteroidota	g__unclassified_p__Bacteroidota	s__unclassified_p__Bacteroidota	OTU3896	1	0	0	0	0	0	0	0	3	0	0	2	2	0	0	8
d__Bacteria	k__norank_d__Bacteria	p__Bdellovibrionota	c__Bdellovibrionia	o__Bdellovibrionales	f__Bdellovibrionaceae	g__Bdellovibrio	s__metagenome_g__Bdellovibrio	OTU1429	1	1	1	7	2	7	3	1	0	0	0	0	0	0	1	24
d__Bacteria	k__norank_d__Bacteria	p__Gemmatimonadota	c__Gemmatimonadetes	o__Gemmatimonadales	f__Gemmatimonadaceae	g__unclassified_f__Gemmatimonadaceae	s__unclassified_f__Gemmatimonadaceae	OTU4039	0	0	0	0	0	0	0	0	0	1	0	0	1	0	0	2
d__Bacteria	k__norank_d__Bacteria	p__Desulfobacterota	c__norank_p__Desulfobacterota	o__norank_c__norank_p__Desulfobacterota	f__norank_o__norank_c__norank_p__Desulfobacterota	g__norank_f__norank_o__norank_c__norank_p__Desulfobacterota	s__delta_proteobacterium_WX81	OTU3376	5	2	0	0	2	0	0	0	1	2	13	0	0	6	1	32
d__Bacteria	k__norank_d__Bacteria	p__Proteobacteria	c__Gammaproteobacteria	o__Xanthomonadales	f__Rhodanobacteraceae	g__Dokdonella	s__unclassified_g__Dokdonella	OTU2244	0	0	12	0	0	14	0	0	2	2	3	0	0	0	6	39
d__Bacteria	k__norank_d__Bacteria	p__Firmicutes	c__Clostridia	o__Clostridiales	f__Clostridiaceae	g__Clostridium_sensu_stricto_1	s__unclassified_g__Clostridium_sensu_stricto_1	OTU295	0	2	0	0	0	0	0	0	0	0	0	0	0	1	0	3
d__Bacteria	k__norank_d__Bacteria	p__Bacteroidota	c__Bacteroidia	o__Chitinophagales	f__Chitinophagaceae	g__norank_f__Chitinophagaceae	s__uncultured_Chitinophagaceae_bacterium_g__norank_f__Chitinophagaceae	OTU3698	11	9	5	0	2	3	0	0	3	16	16	3	1	4	6	79
d__Bacteria	k__norank_d__Bacteria	p__Myxococcota	c__Polyangia	o__Polyangiales	f__Sandaracinaceae	g__norank_f__Sandaracinaceae	s__unclassified_g__norank_f__Sandaracinaceae	OTU4116	0	2	4	1	0	0	0	0	0	11	6	0	0	0	1	25
d__Bacteria	k__norank_d__Bacteria	p__Actinobacteriota	c__Actinobacteria	o__Kineosporiales	f__Kineosporiaceae	g__Kineosporia	s__Kineosporia_aurantiaca	OTU2559	4	0	9	1	0	0	0	26	0	4	2	0	0	1	3	50
d__Bacteria	k__norank_d__Bacteria	p__Verrucomicrobiota	c__Chlamydiae	o__Chlamydiales	f__Parachlamydiaceae	g__Neochlamydia	s__unclassified_g__Neochlamydia	OTU3539	0	0	0	0	0	0	0	0	1	0	1	0	0	0	0	2
d__Bacteria	k__norank_d__Bacteria	p__Bacteroidota	c__Bacteroidia	o__Cytophagales	f__Microscillaceae	g__norank_f__Microscillaceae	s__uncultured_bacterium_g__norank_f__Microscillaceae	OTU5419	2	0	0	0	0	0	0	0	0	6	1	0	0	0	2	11
d__Bacteria	k__norank_d__Bacteria	p__Proteobacteria	c__Alphaproteobacteria	o__Elsterales	f__norank_o__Elsterales	g__norank_f__norank_o__Elsterales	s__unclassified_g__norank_f__norank_o__Elsterales	OTU5048	6	5	1	19	0	23	3	20	13	0	0	0	3	2	0	95
d__Bacteria	k__norank_d__Bacteria	p__Chloroflexi	c__Ktedonobacteria	o__Ktedonobacterales	f__Ktedonobacteraceae	g__unclassified_f__Ktedonobacteraceae	s__unclassified_f__Ktedonobacteraceae	OTU3402	0	0	0	0	0	0	0	0	0	0	4	0	0	0	0	4
d__Bacteria	k__norank_d__Bacteria	p__Proteobacteria	c__Alphaproteobacteria	o__Paracaedibacterales	f__Paracaedibacteraceae	g__norank_f__Paracaedibacteraceae	s__uncultured_bacterium_g__norank_f__Paracaedibacteraceae	OTU2820	0	0	0	0	0	0	0	0	2	0	0	0	0	0	0	2
d__Bacteria	k__norank_d__Bacteria	p__Bdellovibrionota	c__Oligoflexia	o__0319-6G20	f__norank_o__0319-6G20	g__norank_f__norank_o__0319-6G20	s__unclassified_g__norank_f__norank_o__0319-6G20	OTU453	0	0	5	1	4	0	1	1	1	0	0	0	0	0	0	13
d__Bacteria	k__norank_d__Bacteria	p__Chloroflexi	c__Ktedonobacteria	o__Ktedonobacterales	f__Ktedonobacteraceae	g__JG30a-KF-32	s__unclassified_g__JG30a-KF-32	OTU1858	0	0	0	0	0	0	2	0	0	0	0	0	0	0	0	2
d__Bacteria	k__norank_d__Bacteria	p__Myxococcota	c__Polyangia	o__mle1-27	f__norank_o__mle1-27	g__norank_f__norank_o__mle1-27	s__uncultured_bacterium_mle1-27	OTU5486	0	0	0	0	1	1	1	0	0	0	0	0	1	3	1	8
d__Bacteria	k__norank_d__Bacteria	p__Acidobacteriota	c__Vicinamibacteria	o__Vicinamibacterales	f__norank_o__Vicinamibacterales	g__norank_f__norank_o__Vicinamibacterales	s__unclassified_g__norank_f__norank_o__Vicinamibacterales	OTU470	1	2	2	0	0	0	0	0	0	1	0	0	0	1	2	9
d__Bacteria	k__norank_d__Bacteria	p__Proteobacteria	c__Gammaproteobacteria	o__Diplorickettsiales	f__Diplorickettsiaceae	g__norank_f__Diplorickettsiaceae	s__unclassified_g__norank_f__Diplorickettsiaceae	OTU1971	0	0	0	0	0	0	8	0	0	0	3	0	0	0	0	11
[truncated: 4,304 more rows]
